# Supplementary material for: Differences in the Stool Metabolome between Vegans and Omnivores: Analyzing the NIST Stool Reference Material
Source: Metabolites. 2023 Aug 7;13(8):921. doi: 10.3390/metabo13080921 (PMC10456543; doi:10.3390/metabo13080921)
Supplement: Supplementary file 1 [file metabolites-13-00921-s001.zip › Cumeras et al_NIST_stool_Metabolites_07-2023_Supplement data.xlsx]

## Sheet: Untargeted
	10 measurements were done per RM per technique and mode																							Matrix	RM10162_vg-ly	RM10162_vg-ly	RM10162_vg-ly	RM10162_vg-ly	RM10162_vg-ly	RM10162_vg-ly	RM10162_vg-ly	RM10162_vg-ly	RM10162_vg-ly	RM10162_vg-ly	RM10171_vg-aq	RM10171_vg-aq	RM10171_vg-aq	RM10171_vg-aq	RM10171_vg-aq	RM10171_vg-aq	RM10171_vg-aq	RM10171_vg-aq	RM10171_vg-aq	RM10171_vg-aq	RM10172_om-ly	RM10172_om-ly	RM10172_om-ly	RM10172_om-ly	RM10172_om-ly
	data normalized to sum of internal standards (LC-MS/MS) or mTIC (GC-MS)																							File type	Sample	Sample	Sample	Sample	Sample	Sample	Sample	Sample	Sample	Sample	Sample	Sample	Sample	Sample	Sample	Sample	Sample	Sample	Sample	Sample	Sample	Sample	Sample	Sample	Sample
#	identifier	quantification mass	ret.time / ret.index	adduct	MSI	assay	Chemical Name	InChIKey	MW	Chemical formula	SMILES	CID	HMDB	KEGG	LIPIDMAPS	DrugBank	EPA DSSTox	ChEBI	BioCyc	Kingdom	Superclass	Main Class	Class	Subclass	RM10162_vegan-lyophilized_UCDavis_01	RM10162_vegan-lyophilized_UCDavis_02	RM10162_vegan-lyophilized_UCDavis_03	RM10162_vegan-lyophilized_UCDavis_04	RM10162_vegan-lyophilized_UCDavis_05	RM10162_vegan-lyophilized_UCDavis_06	RM10162_vegan-lyophilized_UCDavis_07	RM10162_vegan-lyophilized_UCDavis_08	RM10162_vegan-lyophilized_UCDavis_09	RM10162_vegan-lyophilized_UCDavis_10	RM10171_vegan-aqueous_UCDavis_01	RM10171_vegan-aqueous_UCDavis_02	RM10171_vegan-aqueous_UCDavis_03	RM10171_vegan-aqueous_UCDavis_04	RM10171_vegan-aqueous_UCDavis_05	RM10171_vegan-aqueous_UCDavis_06	RM10171_vegan-aqueous_UCDavis_07	RM10171_vegan-aqueous_UCDavis_08	RM10171_vegan-aqueous_UCDavis_09	RM10171_vegan-aqueous_UCDavis_10	RM10172_omnivore-lyophilized_UCDavis_01	RM10172_omnivore-lyophilized_UCDavis_02	RM10172_omnivore-lyophilized_UCDavis_03	RM10172_omnivore-lyophilized_UCDavis_04	RM10172_omnivore-lyophilized_UCDavis_05
1	6.23_593.55	593.552	6.232	[M-H]-	MSI 2	lipidomics	AAHFA 38:0;O|AAHFA 15:0/23:0;O	YBBSECCJCXWFAW-UHFFFAOYSA-N												Organic compounds	Lipids and lipid-like molecules	Fatty Acyls	Fatty acids and conjugates	Very long-chain fatty acids	322803	292918	326232	313384	297839	400940	302415	345844	203714	277745	23763	46638	671759	585203	508807	587571	708388	548803	541360	673258
2	6.55_607.57	607.568	6.55	[M-H]-	MSI 2	lipidomics	AAHFA 39:0;O|AAHFA 15:0/24:0;O	WPEFEDDPAPUHLL-UHFFFAOYSA-N	608.574	C39H76O4	CCCCCCCCCCCCCCCCCCCCCCC(C(=O)O)OC(=O)CCCCCCCCCCCCCC	133048691								Organic compounds	Lipids and lipid-like molecules	Fatty Acyls	Fatty acids and conjugates	Very long-chain fatty acids	879213	1140986	1208107	1086103	1234304	1104611	1007432	1323208	1051051	927148	91309	115057	2228271	2696990	2253641	2196019	2385373	2206097	2013780	2505512
3	5.87_605.55	605.552	5.873	[M-H]-	MSI 2	lipidomics	AAHFA 39:1;O|AAHFA 15:0/24:1;O	PORDMPXVLMRAMQ-UHFFFAOYSA-N												Organic compounds	Lipids and lipid-like molecules	Fatty Acyls	Fatty acids and conjugates	Very long-chain fatty acids	632216	748171	808927	704789	802099	886257	748533	810878	747125	676746	114381	104533	312618	1399542	1468733	1220838	1493713	1464410	1421643	1522644
4	4.57_551.37	551.371	4.572	[M+Na]+	MSI 2	lipidomics	DG 30:6	PWMYYBPVKIRNSF-UHFFFAOYSA-N												Organic compounds	Lipids and lipid-like molecules	Glycerolipids	Diradylglycerols	DG	196995	293513	243610	187123	258305	264211	263837	203764	233805	167389	923915	610843	1058807	401659	1041309	886304	1042150	980930	1046186	1339503
5	3.92_547.34	547.34	3.915	[M+Na]+	MSI 2	lipidomics	DG 30:8	RHGQOYKCPQKFHE-VOMRAVJHSA-N	524.35	C33H48O5	CC/C=C/C/C=C/C/C=C/CCCC(=O)OC(CO)COC(=O)CCC/C=C/C=C/C=C/C=C/C=C/CC	134763740								Organic compounds	Lipids and lipid-like molecules	Glycerolipids	Diradylglycerols	DG	276149	346742	236208	227412	322690	338735	223588	254733	358501	280793	382637	444138	460982	507955	391961	402509	363050	414916	452621	530562
6	10.18_777.64	777.637	10.178	[M+Na]+	MSI 2	lipidomics	DG 46:5	LXQUYODTYPDGEY-UHFFFAOYSA-N												Organic compounds	Lipids and lipid-like molecules	Glycerolipids	Diradylglycerols	DG	82823	115590	25757	152214	23175	96172	25731	106365	138983	132181	366211	367171	206712	453845	389014	294270	310276	414028	305961	387934
7	10.65_805.67	805.669	10.648	[M+Na]+	MSI 2	lipidomics	DG 48:5	UDKURZGBWUTUPZ-UHFFFAOYSA-N												Organic compounds	Lipids and lipid-like molecules	Glycerolipids	Diradylglycerols	DG	176303	168645	136475	166537	144610	128959	129987	132493	178104	183043	202922	269538	254897	254214	262861	277369	282236	251112	271931	246173
8	10.22_803.65	803.653	10.217	[M+Na]+	MSI 2	lipidomics	DG 48:6	RTUBAYXDBLNMAN-UHFFFAOYSA-N												Organic compounds	Lipids and lipid-like molecules	Glycerolipids	Diradylglycerols	DG	201832	228124	149565	248294	136046	236944	168253	235121	210307	234972	375047	458142	271377	539137	491404	386047	428766	436627	465643	504812
9	5.25_551.51	551.506	5.255	[M-H]-	MSI 2	lipidomics	FAHFA 35:0;O|FAHFA 15:0/20:0;O	WCGCCOOAQXUIDZ-UHFFFAOYSA-N	552.512	C35H68O4	CCCCCCCCCCCCCCCCCCC(C(=O)O)OC(=O)CCCCCCCCCCCCCC	133048653								Organic compounds	Lipids and lipid-like molecules	Fatty Acyls	Fatty acids and conjugates	Long-chain fatty acids	223474	381375	321662	285149	263189	313583	326505	404929	249977	344251	356614	372395	344118	485275	817296	592876	729282	630778	637357	797250
10	5.04_244.17	244.17	5.043	[M+H]+	MSI 2	biogenic amines	3-Hydroxymorphinan	IYNWSQDZXMGGGI-NUEKZKHPSA-N	243.345	C16H21NO	C1CC[C@@]23CCN[C@@H]([C@@H]2C1)CC4=C3C=C(C=C4)O	5463854								Organic compounds	Alkaloids and derivatives	Morphinans		Morphinans	311788	306053	264257	278983	322683	273020	302744	287203	427653	242112	465869	517490	595735	635847	452617	483575	562391	520362	444241	583016
11	9.52_109.03	109.028	9.524	[M+H-C6H4BrClO]+	MSI 2	biogenic amines	5-(Hydroxymethyl)-2-furaldehyde	FRTHNPVVIYLESX-UHFFFAOYSA-N	315.547	C12H8BrClO3	C1=CC(=C(C=C1Br)Cl)OCC2=CC=C(O2)C=O	4250163								Organic compounds	Benzenoids	Phenol ethers		Phenol ethers	134148	201697	147586	175120	66605	156996	257887	220017	186496	227708		4595		6863				4388
12	1.08_369.13	369.134	1.076	[M+H]+	MSI 2	biogenic amines	Curcumin	VFLDPWHFBUODDF-FCXRPNKRSA-N	368.381	C21H20O6	COC1=C(C=CC(=C1)/C=C/C(=O)CC(=O)/C=C/C2=CC(=C(C=C2)O)OC)O	969516	HMDB0002269				21421	CHEBI:3962		Organic compounds	Phenylpropanoids and polyketides	Diarylheptanoids	Linear diarylheptanoids	Curcuminoids	150023	65677	37060	176062	197645	22831	21803	60767	54851	42350	188696	112980	156461	249142	151324	148586	97057	203377	117662
13	6.13_325.14	325.144	6.135	[M+H]+	MSI 3	polyphenols	(E)-1-(2,4-dihydroxyphenyl)-3-[4-(3-methylbut-2-enoxy)phenyl]prop-2-en-1-one	VVSZRCIUFBADJQ-BJMVGYQFSA-N	324.371	C20H20O4	CC(=CCOC1=CC=C(C=C1)/C=C/C(=O)C2=C(C=C(C=C2)O)O)C	38355910								Organic compounds	Phenylpropanoids and polyketides	Linear 1,3-diarylpropanoids	Chalcones and dihydrochalcones	2'-Hydroxychalcones	29172	82155	29977	16850	26136	52966	22259	14504	16906	22399	31966	18960	54577	59472	47489	68930	52470	43905	36031	63368
14	5.81_193.09	193.087	5.812	[M+H-C12H18O4]+	MSI 2	polyphenols	2-(2,6-Dimethoxy-4-prop-2-enylphenoxy)-1-(3,4,5-trimethoxyphenyl)propan-1-ol	KKEKLEUWEJUCRA-UHFFFAOYSA-N	418.481	C23H30O7	CC(C(C1=CC(=C(C(=C1)OC)OC)OC)O)OC2=C(C=C(C=C2OC)CC=C)OC	10477119	HMDB0030828							Organic compounds	Lignans, neolignans and related compounds			Lignans, neolignans and related compounds	33885	146463	79458	47210	58030	85017	28972	111734	56574	94262	198431	251019	102380	186615	265477	216891	168702	109086	181028	145461
15	5.84_173.06	173.06	5.845	[M+H-C6H6]+	MSI 2	polyphenols	4-Phenyl-3-(phenylmethyl)-2(5H)-furanone	KJGOARVXLMFYCA-UHFFFAOYSA-N	250.292	C17H14O2	C1C(=C(C(=O)O1)CC2=CC=CC=C2)C3=CC=CC=C3	38351931								Organic compounds	Organoheterocyclic compounds	Dihydrofurans	Furanones	Butenolides	63009	264112	221526	47966	224964	149335	164065	401062	1265436	91201	156384	266554	88413	183206	309633	217541	193929	258825	129812	254326
16	5.82_229.09	229.087	5.82	[M+H]+	MSI 2	polyphenols	Oxybenzone	DXGLGDHPHMLXJC-UHFFFAOYSA-N	228.244	C14H12O3	COC1=CC(=C(C=C1)C(=O)C2=CC=CC=C2)O	4632	HMDB0015497	C14285		DB01428	22405	CHEBI:34283		Organic compounds	Benzenoids	Benzene and substituted derivatives	Benzophenones	Benzophenones																					287017	292501	285724	370221	485020
17	1.39_154.07	154.074	1.391	[M+H-NO2]+	MSI 2	biogenic amines	4,6-Dimethoxy-2-methyl-5-nitropyrimidine	YOCZCPSNNGRGHZ-UHFFFAOYSA-N	199.164	C7H9N3O4	CC1=NC(=C(C(=N1)OC)[N+](=O)[O-])OC	121596								Organic compounds	Organic 1,3-dipolar compounds	Allyl-type 1,3-dipolar organic compounds	Organic nitro compounds	C-nitro compounds																					74869	42027	67491	63747	152572
18	3.63_271.10	271.097	3.626	[M+H]+	MSI 3	polyphenols	Dalbergione, 4-Methoxy-4'-Hydroxy-	DLCVFIMWFKVRTM-UHFFFAOYSA-N	270.281	C16H14O4	COC1=CC(=O)C(=CC1=O)C(C=C)C2=CC=C(C=C2)O	3950721								Organic compounds	Phenylpropanoids and polyketides	Neoflavonoids	Dalbergiones	Dalbergiones																					29821	37126	19295	30206	38101
19	4.37_529.39	529.387	4.366	[M+Na]+	MSI 2	lipidomics	DG 28:3	KNXDAIUHOAZPRZ-UHFFFAOYSA-N												Organic compounds	Lipids and lipid-like molecules	Glycerolipids	Diradylglycerols	DG																					168815	158693	185911	365881	207588
20	5.76_683.47	683.465	5.756	[M+Na]+	MSI 2	lipidomics	DG 40:10	DXCUMVQPEABBLI-UHFFFAOYSA-N												Organic compounds	Lipids and lipid-like molecules	Glycerolipids	Diradylglycerols	DG																					609310	508788	402121	617852	646030
21	8.91_783.59	783.59	8.912	[M+Na]+	MSI 2	lipidomics	DG 47:9	MKQMYUQJCJEYTE-UHFFFAOYSA-N												Organic compounds	Lipids and lipid-like molecules	Glycerolipids	Diradylglycerols	DG																					290985	842515	182843	548808	452266
22	8.62_600.59	600.592	8.624	[M+NH4]+	MSI 2	lipidomics	DG O-34:0|DG O-18:0_16:0	GPKLYFVEVWPJKU-UHFFFAOYSA-N	582.982	C37H74O4	CCCCCCCCCCCCCCCCCCOCC(CO)OC(=O)CCCCCCCCCCCCCCC	11071977								Organic compounds	Lipids and lipid-like molecules	Glycerolipids	Diradylglycerols	1-alkyl,2-acylglycerols																					216368	211736	232292	257424	249318
23	5.10_844.62	844.619	5.102	[M+H-H2O]+	MSI 3	lipidomics	GlcCer 34:1;O2	QIUDOQCPONPOLS-TWQPPMLVSA-N	699.565	C40H77NO8	CCCCCCCCCCCCCCCC(=O)N[C@@H](CO[C@H]1C(C([C@@H]([C@H](O1)CO)O)O)O)[C@@H](CC=CCCCCCCCCCCCC)O	154573118								Organic compounds	Lipids and lipid-like molecules	Sphingolipids	Glycosphingolipids	Neutral glycosphingolipids																					17227		5824		8561
24	1.67_204.12	204.123	1.672	[M+H]+	MSI 3	biogenic amines	N6-(delta2-Isopentenyl)-adenine	HYVABZIGRDEKCD-UHFFFAOYSA-N	203.244	C10H13N5	CC(=CCNC1=NC=NC2=C1NC=N2)C	92180		C04083		DB08768		CHEBI:17660	CPD-4209	Organic compounds	Organoheterocyclic compounds	Imidazopyrimidines	Purines and purine derivatives	6-aminopurines																					90539	60315	93351	53267	72664
25	1.17_279.23	279.233	1.174	[M-H]-	MSI 3	biogenic amines	FA 18:2 (linoleic acid)	OYHQOLUKZRVURQ-HZJYTTRNSA-N	280.446	C18H32O2	CCCCC/C=C\C/C=C\CCCCCCCC(=O)O	5280450	HMDB0000673	C01595	LMFA01030120		26346	CHEBI:17351		Organic compounds	Lipids and lipid-like molecules	Fatty Acyls	Lineolic acids and derivatives	Lineolic acids and derivatives																					8161	8966	3429	8327	11491
26	6.51_464.45	464.447	6.513	[M+H-H2O]+	MSI 2	polyphenols	Cer 30:1;O2|Cer 18:1;O2/12:0	HXFPPRPLRSPNIB-UHFFFAOYSA-N	481.795	C30H59NO3	CCCCCCCCCCCCCC=CC(C(CO)NC(=O)CCCCCCCCCCC)O	53901181								Organic compounds	Lipids and lipid-like molecules	Sphingolipids	Ceramides	Ceramides																					1889		57011	111872	447149
27	1.31_191.07	191.071	1.312	[M+H-C2H8O4]+	MSI 2	polyphenols	Orcinol .beta.-D-glucoside	YTXIGTCAQNODGD-UJPOAAIJSA-N	286.278	C13H18O7	CC1=CC(=CC(=C1)O[C@H]2[C@@H]([C@H]([C@@H]([C@H](O2)CO)O)O)O)O	12315192								Organic compounds	Organic oxygen compounds	Organooxygen compounds	Carbohydrates and carbohydrate conjugates	Glycosyl compounds																					519040	687529	414051	704351	641911
28	1.66_349.26	349.259	1.66	[M+H]+	MSI 3	biogenic amines	Oxyphenonium	GFRUPHOKLBPHTQ-UHFFFAOYSA-N	348.5	C21H34NO3	CC[N+](C)(CC)CCOC(=O)C(C1CCCCC1)(C2=CC=CC=C2)O	5749	HMDB0014364			DB00219				Organic compounds	Benzenoids	Benzene and substituted derivatives		Benzene and substituted derivatives																					293517	192793	236113	204420	277165
29	4.21_483.13	483.129	4.213	[M+H]+	MSI 3	polyphenols	Silibinin	SEBFKMXJBCUCAI-HKTJVKLFSA-N	482.437	C25H22O10	COC1=C(C=CC(=C1)[C@@H]2[C@H](OC3=C(O2)C=C(C=C3)[C@@H]4[C@H](C(=O)C5=C(C=C(C=C5O4)O)O)O)CO)O	31553		D08515			32044	CHEBI:9144		Organic compounds	Lignans, neolignans and related compounds	Flavonolignans		Flavonolignans																					6894	10147		5869	7027
30	10.70_839.75	839.748	10.703	[M+Na]+	MSI 2	lipidomics	TG O-50:2|TG O-18:2_16:0_16:0	KZIFRMZWILOTPZ-UHFFFAOYSA-N												Organic compounds	Lipids and lipid-like molecules	Glycerolipids	Triradylcglycerols	TG																					230620	292505	222919	253319	215578
31	10.24_832.77	832.775	10.24	[M+NH4]+	MSI 2	lipidomics	TG O-50:3|TG O-19:2_15:1_16:0	CUVMUEYWDFRRQJ-UHFFFAOYSA-N												Organic compounds	Lipids and lipid-like molecules	Glycerolipids	Triradylcglycerols	TG																					484423	346213	400416	544247	414445
32	5.96_275.10	275.103	5.96	[2M+H]+	MSI 2	biogenic amines	Trigonelline	WWNNZCOKKKDOPX-UHFFFAOYSA-N	137.136	C7H7NO2	C[N+]1=CC=CC(=C1)C(=O)[O-]	5570	HMDB0000875	C01004			32229	CHEBI:18123	METHYLNICOTINATE	Organic compounds	Alkaloids and derivatives			Alkaloids and derivatives								4066			6859	5698					10914			6143	19951554	11276008	18699366	14701381	25380949
33	5.07_553.39	553.386	5.07	[M+Na]+	MSI 2	lipidomics	DG 30:5	DJXJTJKDICBWFD-UHFFFAOYSA-N												Organic compounds	Lipids and lipid-like molecules	Glycerolipids	Diradylglycerols	DG	16715072	17678471	16249595	17161696	15165060	19304896	17225931	16289817	20443681	15313371	13360187	14399226	15787685	42804068	14625966	14919070	15932098	14086058	14380437	14496666	5089	9292	16721
34	8.17_682.60_8.18_687.55	682.5984_687.5536	8.173_8.176	[M+NH4]+_[M+Na]+	MSI 2	lipidomics	TG 38:1|TG 8:0_12:0_18:1	LJDCFPONKMZCBE-UHFFFAOYSA-N												Organic compounds	Lipids and lipid-like molecules	Glycerolipids	Triradylcglycerols	TG	4590		759													2810		3895			10396632	12588303	16790323	16007387	14255143
35	6.76_605.48_6.75_600.52	605.475_600.5201	6.757_6.755	[M+Na]+_[M+NH4]+	MSI 2	lipidomics	TG 32:0|TG 8:0_12:0_12:0	JUSFMNAZAGJNRN-UHFFFAOYSA-N	582.486	C35H66O6	CCCCCCCCCCCC(=O)OCC(COC(=O)CCCCCCC)OC(=O)CCCCCCCCCCC	15904520								Organic compounds	Lipids and lipid-like molecules	Glycerolipids	Triradylcglycerols	TG	15749	37755	57891	19901	26333	74756	33646	11765	15711	4660	15976	321152	28772	40783	18812	12857	13927	37595	23806	78690	42569354	37759391	50864387	39630715	54891738
36	1.62_437.23	437.235	1.616	[M+H]+	MSI 2	biogenic amines	HC toxin	GNYCTMYOHGBSBI-SVZOTFJBSA-N	436.503	C21H32N4O6	C[C@@H]1C(=O)N[C@H](C(=O)N2CCC[C@@H]2C(=O)N[C@H](C(=O)N1)C)CCCCCC(=O)[C@@H]3CO3	13889849								Organic compounds	Organic acids and derivatives	Carboxylic acids and derivatives	Amino acids, peptides, and analogues	Peptides	5715737	6198881	5937265	5730829	4864602	6836359	8132949	5994081		7055280	9554323	9928719	8841706	11232789	9411194	10216729	11548110	11864291	10406552
37	6.06_572.49	572.489	6.062	[M+NH4]+	MSI 2	lipidomics	TG 30:0|TG 8:0_10:0_12:0	UPRCMDWLDNCPMM-UHFFFAOYSA-N												Organic compounds	Lipids and lipid-like molecules	Glycerolipids	Triradylcglycerols	TG			19310			5774								182226					11501		26995174	25964136	36340559	25499408	38661516
38	1.58_393.21	393.209	1.582	[M+H]+	MSI 2	biogenic amines	Indacaterol	QZZUEBNBZAPZLX-QFIPXVFZSA-N	392.492	C24H28N2O3	CCC1=C(C=C2CC(CC2=C1)NC[C@@H](C3=C4C=CC(=O)NC4=C(C=C3)O)O)CC	6918554	HMDB0015608	D09318		DB05039		CHEBI:68575		Organic compounds	Organoheterocyclic compounds	Quinolines and derivatives	Quinolones and derivatives	Hydroxyquinolones	3657057	3832839	3811182	3076129	2658410	3774906	5463104	3908291		4316854	6725631	7768223	7348712	7895565	8104155	8575733	7999778	9833147	6590013	6789		4261
39	1.93_426.36	426.358	1.931	[M+H]+	MSI 2	lipidomics	CAR 18:1	IPOLTUVFXFHAHI-UHFFFAOYSA-N	425.646	C25H47NO4	CCCCCCCCC=CCCCCCCCC(=O)OC(CC(=O)[O-])C[N+](C)(C)C	166951								Organic compounds	Lipids and lipid-like molecules	Fatty Acyls	Fatty acid esters	Acyl carnitines	5274		6351			5664	7896	5539										7141			6233735	8736639	6885731	6910338	7021098
40	3.61_174.02	174.022	3.612	[M+H]+	MSI 2	biogenic amines	(4-Aminophenyl)phosphonic acid	OAOBMEMWHJWPNA-UHFFFAOYSA-N	173.107	C6H8NO3P	C1=CC(=CC=C1N)P(=O)(O)O	53590								Organic compounds	Benzenoids	Benzene and substituted derivatives	Aniline and substituted anilines	Aniline and substituted anilines	5691	5052					7489				9555		11935	22819		9198		11780	12281		5878259	4552134	5656894	5704806	7241761
41	9.91_842.76	842.76	9.908	[M+NH4]+	MSI 2	lipidomics	TG O-51:5|TG O-15:0_18:2_18:3	OSNSOSWVUVUMPK-UHFFFAOYSA-N												Organic compounds	Lipids and lipid-like molecules	Glycerolipids	Triradylcglycerols	TG	1225658	1249586	1276830	1038820	1232543	1270270	1257238	1210867	1431351	1229815	1597543	1534787	1762144	1647757	1373011	1405351	1582332	1365703	1697865	1550044	2517	1970	4576	914	5971
42	12.23_964.93_12.22_969.88	964.9275_969.8794	12.226_12.225	[M+NH4]+_[M+Na]+	MSI 1	lipidomics	TG 58:0|TG 18:0_18:0_22:0	KFFURWDSOSXFNL-UHFFFAOYSA-N	946.893	C61H118O6	CCCCCCCCCCCCCCCCCCCCCC(=O)OCC(COC(=O)CCCCCCCCCCCCCCCCC)OC(=O)CCCCCCCCCCCCCCCCC	132975204								Organic compounds	Lipids and lipid-like molecules	Glycerolipids	Triradylcglycerols	TG	7749321	8375906	4388569	5101430	5542331	4002995	4229147	4078994	5840794	7350648	6204128	5058877	6633165	8878349	6259596	7045123	5846678	7600538	7183156	7093880	9282	25520	11223	9382	18099
43	7.46_633.51_7.44_628.55	633.5061_628.5513	7.458_7.443	[M+Na]+_[M+NH4]+	MSI 2	lipidomics	TG 34:0|TG 8:0_12:0_14:0	RJHHICMBDSUIHF-UHFFFAOYSA-N												Organic compounds	Lipids and lipid-like molecules	Glycerolipids	Triradylcglycerols	TG	30983	56148	106913	54926	67906	126377	35199	37469	59044	30738	54647	344326	80367	108106	71048	55916	67362	82582	70236	150916	49191305	47205033	52389025	48036439	70071407
44	1.76_400.34	400.342	1.759	[M+H]+	MSI 2	lipidomics	CAR 16:0	XOMRRQXKHMYMOC-NRFANRHFSA-N	399.609	C23H45NO4	CCCCCCCCCCCCCCCC(=O)O[C@@H](CC(=O)[O-])C[N+](C)(C)C	16902								Organic compounds	Lipids and lipid-like molecules	Fatty Acyls	Fatty acid esters	Acyl carnitines	10490	14299	9502				12625	9773			8349		4894	16196		10434	8183	13554	20339	11716	7340317	8824796	6713755	6782817	6443979
45	2.79_241.07	241.071	2.791	[M+H]+	MSI 2	biogenic amines	4,6,8-Trihydroxy-7-methoxy-3-methyl-3,4-dihydroisochromen-1-one	ZLLQQKITWRWKTD-UHFFFAOYSA-N	240.21	C11H12O6	CC1C(C2=CC(=C(C(=C2C(=O)O1)O)OC)O)O	23757117								Organic compounds	Benzenoids	Benzene and substituted derivatives	Benzoic acids and derivatives	Hydroxybenzoic acid derivatives	2274542	2431497	1972058	1900994	1856428	2151448	2968255	1916411	2114562	2282226	5135768	5609246	5502201	5615495	5119065	5547606	5611848	5122627	4664229	5121449	5111		6273
46	5.51_202.18	202.18	5.507	[M+H]+	MSI 2	biogenic amines	1-(2-Hydroxyethyl)-2,2,6,6-tetramethyl-4-piperidinol	STEYNUVPFMIUOY-UHFFFAOYSA-N	201.306	C11H23NO2	CC1(CC(CC(N1CCO)(C)C)O)C	104301								Organic compounds	Organoheterocyclic compounds	Piperidines		Piperidines	72161	13417	43734	20822	75751	90868	61526	24843	17660	44910	136055167	145371867	132643623	143122005	119581502	147553569	136419422	127017070	125373399	135079167	75263	35163	96084	20586	36759
47	0.99_531.40	531.404	0.995	[M+H]+	MSI 2	biogenic amines	D-.alpha.-Tocopherol succinate	IELOKBJPULMYRW-UHFFFAOYSA-N	530.78	C33H54O5	CC1=C(C(=C(C2=C1OC(CC2)(C)CCCC(C)CCCC(C)CCCC(C)C)C)OC(=O)CCC(=O)O)C	425400	HMDB0033685							Organic compounds	Lipids and lipid-like molecules	Prenol lipids	Quinone and hydroquinone lipids	Vitamin E compounds	1065529	308324	477756	199635	1562884	207004	329004	378926	293536	256523	659430	607390	703053	1156542	933452	889111	636781	1593501	925814	249179			1437
48	3.55_307.11	307.108	3.554	[M+H]+	MSI 2	polyphenols	2-Methyl-3-oxo-5,6-diphenyl-2,3-dihydro-4-pyridazinecarboxylic acid	JLZANJDGGAPGOF-UHFFFAOYSA-N	306.316	C18H14N2O3	CN1C(=O)C(=C(C(=N1)C2=CC=CC=C2)C3=CC=CC=C3)C(=O)O	7454223								Organic compounds	Organoheterocyclic compounds	Diazines	Pyridazines and derivatives	Phenylpyridazines			3221		3503						4096			3617						4101	1420368	1842542	1162152	1843598	1540286
49	6.18_307.11	307.108	6.177	[M+H]+	MSI 2	biogenic amines	2-Methyl-3-oxo-5,6-diphenyl-2,3-dihydro-4-pyridazinecarboxylic acid	JLZANJDGGAPGOF-UHFFFAOYSA-N	306.316	C18H14N2O3	CN1C(=O)C(=C(C(=N1)C2=CC=CC=C2)C3=CC=CC=C3)C(=O)O	7454223								Organic compounds	Organoheterocyclic compounds	Diazines	Pyridazines and derivatives	Phenylpyridazines		5057		5276	4120			3876			14570	12722	17551	20924		14026	10655	13024	5527	16313	5656286	5441912	5368022	5400588	5786589
50	8.78_274.10	274.105	8.784	[M-H]-	MSI 2	biogenic amines	(4E,6E)-3-(4-Formylanilino)-8-hydroxyocta-4,6-dienoic acid	DRKWUQGWCYRVJI-ZPUQHVIOSA-N	275.3	C15H17NO4	C1=CC(=CC=C1C=O)NC(CC(=O)O)/C=C/C=C/CO	44715362								Organic compounds	Organic acids and derivatives	Carboxylic acids and derivatives	Amino acids, peptides, and analogues	Amino acids and derivatives	2594	10553	601	9574	5854	7789	8219	11296	6899	3259	9774	17651	6260	1523	11881		833	12369	654	6748	2501337	2301898	2425825	2759402	2927244
51	7.63_680.58_7.63_685.54	680.5824_685.5401	7.632_7.63	[M+NH4]+_[M+Na]+	MSI 2	lipidomics	TG 38:2|TG 8:0_12:0_18:2	GKFMNESBEDDOOX-UHFFFAOYSA-N												Organic compounds	Lipids and lipid-like molecules	Glycerolipids	Triradylcglycerols	TG	17344	7210	4113	4379	12452	2608	6890	3373	5602	1991	1953	6655	1862	1516	5623	2527	74230	7775	10846	3176	3674812	4777393	6485102	5772837	7818498
52	8.26_708.61_8.26_713.57	708.6141_713.5693	8.26_8.258	[M+NH4]+_[M+Na]+	MSI 2	lipidomics	TG 40:2|TG 10:0_12:0_18:2	GXRODSBSDBCXSO-UHFFFAOYSA-N												Organic compounds	Lipids and lipid-like molecules	Glycerolipids	Triradylcglycerols	TG															3713						2640932	3052043	4009858	4042363	3671801
53	5.26_177.09	177.091	5.26	[M+H-NH3]+	MSI 2	polyphenols	(S)-Salsoline	YTPRLBGPGZHUPD-ZETCQYMHSA-N	193.243	C11H15NO2	C[C@H]1C2=CC(=C(C=C2CCN1)O)OC	442356	HMDB0012469	C09640				CHEBI:112		Organic compounds	Organoheterocyclic compounds	Tetrahydroisoquinolines		Tetrahydroisoquinolines	1852884	2754444	1328193	727341	2760009	4142699	4239696	5577894	3785481	4190360	2292454	2696278	2179523	2138734	2841435	2374159	2211758	3038309	2034426	1725275	8603	9551	8781	164018
54	9.34_738.66_9.34_743.62	738.6603_743.6158	9.339_9.338	[M+NH4]+_[M+Na]+	MSI 1	lipidomics	TG 42:1|TG 12:0_12:0_18:1	VHSCSWKCDUHRCW-UHFFFAOYSA-N	721.147	C45H84O6		54392586								Organic compounds	Lipids and lipid-like molecules	Glycerolipids	Triradylcglycerols	TG	11710	29161	22333	20914	9933	19011		28806	44557	17170	23204	38986	13968	78312	22035	22451	50752	42996	29647	22096	11505856	11859182	18580439	19009429	15134819
55	7.68_212.04	212.038	7.677	[M+H-CH5N]+	MSI 2	biogenic amines	Ethyl 2-amino-4-methyl-5-[(methylamino)carbonyl]-3-thiophenecarboxylate	BWHSRARJTQMOJM-UHFFFAOYSA-N	242.296	C10H14N2O3S	CCOC(=O)C1=C(SC(=C1C)C(=O)NC)N	2435390								Organic compounds	Organoheterocyclic compounds	Thiophenes	Aminothiophenes	2-aminothiophenes	1127150	1259720	903163	1063108	915448	1255917	1804478	1216544	1353638	1212896	1832766	2196926	2031841	2042736	1941886	2301617	1859745	2115276	1737369	2368306	4946
56	5.96_138.05	138.055	5.961	[M+H]+	MSI 2	biogenic amines	3-Pyridylacetic acid	QZDWODWEESGPLC-UHFFFAOYSA-N	137.136	C7H7NO2	CC(=O)OC1=CN=CC=C1	87289								Organic compounds	Organoheterocyclic compounds	Pyridines and derivatives		Pyridines and derivatives	2650448	3299099	2108294	2603451	1990868	2370839	3540610	2536848	2567304	2625214	5656180	5890428	6776884	6552537	5381906	5574505	5512360	5546135	5160995	7621097	1248777224	992922057	1214631495	1100090444	1435958741
57	1.58_409.18	409.183	1.581	[M+Na]+	MSI 2	biogenic amines	(3E)-4-(2-(Hydroxymethyl)-6,6-dimethyl-4-oxocyclohex-2-en-1-yl)but-3-en-2-yl .beta.-D-glucopyranoside	AURHKHAKYLTFJN-YLZFFJMTSA-N	386.194	C19H30O8	CC(/C=C/C1C(=CC(=O)CC1(C)C)CO)O[C@H]2[C@@H]([C@H]([C@@H]([C@H](O2)CO)O)O)O	102502407								Organic compounds	Lipids and lipid-like molecules	Fatty Acyls	Fatty acyl glycosides	Fatty acyl glycosides of mono- and disaccharides	1297318	1527846	1258553	1314132	808716	1374080	1807102	1199358		1293413	2234460	2566867	2184387	2439653	2530025	3366795	2796548	2679004	2337578	4502
58	8.16_264.12	264.123	8.156	[M+H]+	MSI 2	biogenic amines	4-Phenyl-3,4-dihydro[1,3,5]triazino[1,2-a]benzimidazol-2-amine	INKZIWWVJYBNOA-UHFFFAOYSA-N	263.298	C15H13N5	C1=CC=C(C=C1)C2N=C(NC3=NC4=CC=CC=C4N23)N	5337618								Organic compounds	Organoheterocyclic compounds	Benzimidazoles		Benzimidazoles	1347927	1304250	1137223	1177825	1049314	1155656	1806824	1173664	1288657	1422318	3154410	3088866	3167081	3182491	2877739	2758562	3278037	3019788	2618735	2841649
59	5.14_502.45	502.447	5.14	[M+NH4]+	MSI 2	lipidomics	DG 26:0|DG 12:0_14:0	PHOVHROLCJBNRG-UHFFFAOYSA-N	484.753	C29H56O5	CCCCCCCCCCCCCC(=O)OC(CO)COC(=O)CCCCCCCCCCC	76047375								Organic compounds	Lipids and lipid-like molecules	Glycerolipids	Diradylglycerols	DG								5004													1277259	1233332	1585326	2028785	1534846
60	0.92_414.05_0.92_419.00_0.92_416.05	414.0493_419.0047_416.0462	0.916_0.917_0.916	[M+NH4]+_[M+Na]+_[M+H+NH3+2i]+	MSI 2	polyphenols	Sucralose	BAQAVOSOZGMPRM-QBMZZYIRSA-N	397.634	C12H19Cl3O8	C([C@@H]1[C@@H]([C@@H]([C@H]([C@H](O1)O[C@]2([C@H]([C@@H]([C@H](O2)CCl)O)O)CCl)O)O)Cl)O	71485		C12285			40829	CHEBI:32159		Organic compounds	Organic oxygen compounds	Organooxygen compounds	Carbohydrates and carbohydrate conjugates	Glycosyl compounds	8318128	8673472	11186294	7682394	8699245	11974491	4960952	11441300	7454863	7406007	13596368	15586181	12401335	12925407	13150852	13107001	13344428	12155906	11317135	9172519	60740	80967	24859	47744	43245
61	8.10_661.54_8.10_656.58	661.5377_656.5828	8.096_8.098	[M+Na]+_[M+NH4]+	MSI 2	lipidomics	TG 36:0|TG 10:0_12:0_14:0	IGFLMGKVDGKBEZ-UHFFFAOYSA-N												Organic compounds	Lipids and lipid-like molecules	Glycerolipids	Triradylcglycerols	TG	144359	192620	253987	139287	159290	193486	136998	106156	87873	110250	136727	458912	135545	247221	107966	96084	164236	135947	103397	240877	45820830	36862642	49068144	40614171	55031132
62	2.58_443.01_2.58_441.01_2.51_397.00_2.51_432.98	443.0103_441.0132_397.0041_432.9809	2.575_2.581_2.507_2.506	[M+CHO2+2i]-_[M+CHO2]-_[M-H]-_[M+Cl+2i]-	MSI 2	biogenic amines	Sucralose	BAQAVOSOZGMPRM-QBMZZYIRSA-N	397.634	C12H19Cl3O8	C([C@@H]1[C@@H]([C@@H]([C@H]([C@H](O1)O[C@]2([C@H]([C@@H]([C@H](O2)CCl)O)O)CCl)O)O)Cl)O	71485		C12285			40829	CHEBI:32159		Organic compounds	Organic oxygen compounds	Organooxygen compounds	Carbohydrates and carbohydrate conjugates	Glycosyl compounds	556912	938465	428022	895864	1438567	562173	1597392	1092277	1295428	1218300	8178744	7155260	6299420	5173806	2478168	5021098	2077295	2156028	4905798	2086858	5326	6918	9037	2848	9295
63	5.26_317.17	317.173	5.256	[M+H-2H2O]+	MSI 1	polyphenols	(5R)-5-hydroxy-1-(4-hydroxy-3-methoxyphenyl)decan-3-one	NLDDIKRKFXEWBK-CQSZACIVSA-N	294.387	C17H26O4	CCCCC[C@H](CC(=O)CCC1=CC(=C(C=C1)O)OC)O	12310197								Organic compounds	Benzenoids	Phenols	Methoxyphenols	Gingerols	2087868	2814554	1162883	1188270	2427903	2782864	5969932	3829597	4599968	3388676	1191407	1407802	2219229	1554402	1530354	1703151	1274568	1640973	1177659	1063686				131120	4435
64	7.83_389.20	389.204	7.825	[M+H]+	MSI 2	biogenic amines	3-[3-(2-Piperidinoethoxy)phenyl]-5-(1H-1,2,4-triazol-5-yl)-1H-indazole	XDJCLCLBSGGNKS-UHFFFAOYSA-N	388.466	C22H24N6O	C1CCN(CC1)CCOC2=CC=CC(=C2)C3=NNC4=C3C=C(C=C4)C5=NC=NN5	10430360								Organic compounds	Organoheterocyclic compounds	Azoles	Pyrazoles	Phenylpyrazoles	3251003	2820189	1946935	2178540	1900280	2165765	4310439	2486721	2368121	3112192	7282674	5417494	6861605	6478024	7271433	6909623	8254005	7994220	5762106	9377679	4063	24943	7611		16139
65	8.79_715.58_8.78_710.63	715.585_710.6295	8.786_8.776	[M+Na]+_[M+NH4]+	MSI 1	lipidomics	TG 40:1|TG 10:0_12:0_18:1	GIEHMANYVZHXTR-UHFFFAOYSA-N												Organic compounds	Lipids and lipid-like molecules	Glycerolipids	Triradylcglycerols	TG	17203	12838	21582	4796	10534	22561	8163	29825	11987	4994	8347	21788	11701	41950		17213		16379	20426	11423	8187926	5877323	9783821	8170863	7808003
66	8.92_762.66_8.91_767.62	762.6603_767.6161	8.92_8.914	[M+NH4]+_[M+Na]+	MSI 2	lipidomics	TG 44:3|TG 8:0_18:1_18:2	MXPYGYYPZOZCCJ-UHFFFAOYSA-N												Organic compounds	Lipids and lipid-like molecules	Glycerolipids	Triradylcglycerols	TG	5549	23422	6501	11394	12306	85760		6835												11089	2741616	3314178	4556004	3937985	3771414
67	8.72_684.61_8.72_689.57	684.6139_689.5689	8.724_8.719	[M+NH4]+_[M+Na]+	MSI 2	lipidomics	TG 38:0|TG 12:0_12:0_14:0	SMUUMIRCIBXLGI-UHFFFAOYSA-N	667.056	C41H78O6	CCCCCCCCCCCCCC(=O)OCC(COC(=O)CCCCCCCCCCC)OC(=O)CCCCCCCCCCC	4589033	HMDB0031124							Organic compounds	Lipids and lipid-like molecules	Glycerolipids	Triradylcglycerols	TG	145393	162956	210370	164388	162034	249341	161157	146812	133747	166670	117239	383114	143856	268046	123953	127767	169236	122723	154963	212967	39492684	37647602	43498119	41369263	58808138
68	9.02_274.09	274.086	9.022	[M+H-H2O]+	MSI 2	biogenic amines	Alanap	JXTHEWSKYLZVJC-UHFFFAOYSA-N	291.301	C18H13NO3	C1=CC=C2C(=C1)C=CC=C2NC(=O)C3=CC=CC=C3C(=O)O	8594		C18869			44149	CHEBI:60833		Organic compounds	Benzenoids	Naphthalenes		Naphthalenes		3175	9746	743	2259	11032	16662	17085	17720	10627	13305	20248	3575	18950	37146	34614	26990	53046	20843	29145	3299476	2298226	2839645	2775180	3882740
69	8.00_266.14	266.139	8.003	[M+H]+	MSI 2	biogenic amines	Anisomycin	YKJYKKNCCRKFSL-RDBSUJKOSA-N	265.305	C14H19NO4	CC(=O)O[C@@H]1[C@H](CN[C@@H]1CC2=CC=C(C=C2)OC)O	253602		C11281		DB07374	48305	CHEBI:338412		Organic compounds	Benzenoids	Phenol ethers	Anisoles	Anisoles	405764	435963	294020	347519	271436	371631	536712	368931	402910	388376	798933	820549	980482	893004	876467	959908	732043	808469	811117	857244		2999
70	4.48_479.37_4.49_474.42	479.371_474.4155	4.484_4.487	[M+Na]+_[M+NH4]+	MSI 2	lipidomics	DG 24:0|DG 12:0_12:0	ULWFPIOQPKBMLO-UHFFFAOYSA-N	456.7	C27H52O5	CCCCCCCCCCCCCCCC(=O)OCC(CO)OC(=O)CCCCCCC	54360019								Organic compounds	Lipids and lipid-like molecules	Glycerolipids	Diradylglycerols	DG	4155	17627	24793	3937		10962	6080	14906		7596	2886	18579	8189	12310	4524	4304	7989	6129	3477	7997	1417647	2246135	1827817	2224905	2353979
71	7.11_294.21	294.207	7.108	[M+H]+	MSI 2	polyphenols	Pramocaine	DQKXQSGTHWVTAD-UHFFFAOYSA-N	293.402	C17H27NO3	CCCCOC1=CC=C(C=C1)OCCCN2CCOCC2	4886		C07892			57886	CHEBI:8357		Organic compounds	Benzenoids	Phenol ethers		Phenol ethers								1166				5370		632					8273		375178	461726	408718	583389	604618
72	2.10_329.25	329.248	2.103	[M-H]-	MSI 2	lipidomics	Docosapentaenoic acid	YUFFSWGQGVEMMI-JLNKQSITSA-N	330.505	C22H34O2	CC/C=C\C/C=C\C/C=C\C/C=C\C/C=C\CCCCCC(=O)O	5497182	HMDB0006528	C16513	LMFA04000044			CHEBI:53488		Organic compounds	Lipids and lipid-like molecules	Fatty Acyls	Fatty acids and conjugates	Very long-chain fatty acids	126033	318953	210625	225516	341796	222527	180532	449891	196882	433169	783722	737057	764375	1051777	761457	654650	879723	711881	535103	734033	85009135	93516004	83654145	78418625	78352416
73	5.43_582.47	582.466	5.426	[M+CH3COO]-	MSI 2	lipidomics	Cer 32:2;O3|Cer 18:1;O2/14:1;O	OTZJKMMOYAQABJ-UHFFFAOYSA-N												Organic compounds	Lipids and lipid-like molecules	Sphingolipids	Ceramides	Long-chain ceramides					5439																900259	1111030	626834	729633	681259
74	5.16_586.48_5.17_602.46	586.4801_602.4569	5.164_5.167	[M+H-H2O]+_[M+H]+	MSI 2	lipidomics	Cer 37:5;O4	YFHVRBBASNTMPP-UHFFFAOYSA-N												Organic compounds	Lipids and lipid-like molecules	Sphingolipids	Ceramides	Long-chain ceramides				9404								6858							6938		1216880	1801078	1193294	906536	1083484
75	3.61_172.01	172.006	3.614	[M+OH]-	MSI 2	biogenic amines	2-Nitrophenyl hydrosulfide	JKIFPWHZEZQCQA-UHFFFAOYSA-N	155.176	C6H5NO2S	C1=CC=C(C(=C1)[N+](=O)[O-])S	21002								Organic compounds	Benzenoids	Benzene and substituted derivatives	Nitrobenzenes	Nitrobenzenes	4891	583	2421	2534	5520			2620	2020	2955									4050		229099	358849	443102	465202	518698
76	5.28_156.08	156.077	5.283	[M-H-C2H7N]-	MSI 2	biogenic amines	N,N-dimethylarginine	YDGMGEXADBMOMJ-LURJTMIESA-N	202.254	C8H18N4O2	CN(C)C(=NCCC[C@@H](C(=O)O)N)N	123831	HMDB0001539	C03626		DB01686	44033	CHEBI:17929		Organic compounds	Organic acids and derivatives	Carboxylic acids and derivatives	Amino acids, peptides, and analogues	Amino acids and derivatives	921	1050	844	826	453	548	596		1054	776	7121	2946	2776	1077	3855	3644	1902	2002	1845	1459	130285	103614	123953	131524	158466
77	8.09_195.08	195.077	8.086	[M+H-H2O]+	MSI 2	biogenic amines	2-Benzylbenzoic acid	FESDHLLVLYZNFY-UHFFFAOYSA-N	212.244	C14H12O2	C1=CC=C(C=C1)CC2=CC=CC=C2C(=O)O	11924								Organic compounds	Benzenoids	Benzene and substituted derivatives	Diphenylmethanes	Diphenylmethanes	9417	21141	12122	20523	8239	18190	24288	29583	23087	20083	66665	58426	32971	49610	54956	55842	76569	38662	69257	60296	4716318	3417366	4468051	4113726	5086807
78	8.98_788.68_8.99_793.63	788.6761_793.6331	8.984_8.99	[M+NH4]+_[M+Na]+	MSI 1	lipidomics	TG 46:4|TG 10:0_18:2_18:2	GTDWNYZZRCJYOX-UHFFFAOYSA-N												Organic compounds	Lipids and lipid-like molecules	Glycerolipids	Triradylcglycerols	TG	5295	4680	6839	5939	13843				11370												810986	1061432	1162124	1150573	1289009
79	9.30_717.60_9.31_712.65	717.5997_712.6453	9.304_9.314	[M+Na]+_[M+NH4]+	MSI 1	lipidomics	TG 40:0|TG 12:0_14:0_14:0	UGBCBXMLXHJYBS-UHFFFAOYSA-N	695.109	C43H82O6	CCCCCCCCCCCCCC(=O)OCC(COC(=O)CCCCCCCCCCC)OC(=O)CCCCCCCCCCCCC	5127847								Organic compounds	Lipids and lipid-like molecules	Glycerolipids	Triradylcglycerols	TG	110431	134941	158010	78575	121014	147250	69629	85044	53759	179375	3041	124776	116841	278788	138810	130612	89274	49070	35606	163233	19857207	20040096	24296218	25667116	28971585
80	6.14_369.30	369.298	6.138	[2M+H]+	MSI 2	polyphenols	.gamma.-Undecalactone	PHXATPHONSXBIL-UHFFFAOYSA-N	184.276	C11H20O2	CCCCCCCC1CCC(=O)O1	7714	HMDB0038311		LMFA07040030					Organic compounds	Organoheterocyclic compounds	Lactones	Gamma butyrolactones	Gamma butyrolactones		22889	18880			40781	7205	30489					11368							11847	1553935	2530542	1987897	2341145	2314140
81	5.60_186.06	186.055	5.6	[M-H]-	MSI 2	biogenic amines	3-Indoleacrylic acid	PLVPPLCLBIEYEA-AATRIKPKSA-N	187.195	C11H9NO2	C1=CC=C2C(=C1)C(=CN2)/C=C/C(=O)O	5375048							CPD-11578	Organic compounds	Organoheterocyclic compounds	Indoles and derivatives	Indoles	Indoles	147505	161169	113984	123645	102654	150918	174530	131100	144385	134396	304385	340997	343346	279653	296317	361005	340910	280826	289554	334031	1485
82	2.33_140.03	140.034	2.329	[M+H-H2O]+	MSI 2	biogenic amines	2,6-Dioxo-4-piperidinecarboxylic acid	QQGLSDQDZJVJSB-UHFFFAOYSA-N	157.124	C6H7NO4	C1C(CC(=O)NC1=O)C(=O)O	237026								Organic compounds	Organoheterocyclic compounds	Piperidines	Piperidinecarboxylic acids and derivatives	Piperidinecarboxylic acids		5215	5529	686	3644			5384	8273				7871				5198			8112	746625	632257	752025	708200	783058
83	4.96_481.43_4.97_517.40	481.4263_517.4033	4.963_4.966	[M-H]-_[M+Cl]-	MSI 2	lipidomics	FAHFA 30:0;O|FAHFA 12:0/18:0;O	UMCCQNGMFKETPC-UHFFFAOYSA-N	482.434	C30H58O4	CCCCCCCCCCCC(=O)OC(CCCCCCCCC)CCCCCCCC(=O)O	101527404								Organic compounds	Lipids and lipid-like molecules	Fatty Acyls	Fatty acids and conjugates	Long-chain fatty acids	119095	154346	138853	135287	111862	119578	92454	149705	108729	102592	254378	209801	248404	260065	223412	149988	243723	196860	216830	262183	17617521	21917639	17110753	15227695	15977414
84	5.59_144.11	144.113	5.591	[M+H-CH3NO]+	MSI 2	biogenic amines	L-NG-Monomethylarginine	NTNWOCRCBQPEKQ-YFKPBYRVSA-N	188.228	C7H16N4O2	CN=C(N)NCCC[C@@H](C(=O)O)N	132862	HMDB0029416	C03884			43284	CHEBI:28229		Organic compounds	Organic acids and derivatives	Carboxylic acids and derivatives	Amino acids, peptides, and analogues	Amino acids and derivatives		10275	6859	4209	6181	3886	5868	3576		3130	3387	6730	9630	8719	14883	17395	9128	16399	2953	6665	904407	612107	866998	727957	991757
85	8.04_246.11	246.109	8.037	[M+H]+	MSI 2	biogenic amines	4-[3-(Trifluoromethyl)phenyl]-4-piperidinol	ILKPZCKFWLTEBQ-UHFFFAOYSA-N	245.241	C12H14F3NO	C1CNCCC1(C2=CC(=CC=C2)C(F)(F)F)O	75255								Organic compounds	Organoheterocyclic compounds	Piperidines	Phenylpiperidines	Phenylpiperidines	190642	215513	117514	148710	112151	125950	202615	138836	150031	144474	358693	368215	407351	370585	336624	359402	275065	328495	327811	404282	30655264	23189259	25816608	24178368	33251988
86	1.33_451.22	451.216	1.333	[M+H]+	MSI 2	polyphenols	Cediranib	XXJWYDDUDKYVKI-UHFFFAOYSA-N	450.506	C25H27FN4O3	CC1=CC2=C(N1)C=CC(=C2F)OC3=NC=NC4=CC(=C(C=C43)OC)OCCCN5CCCC5	9933475		D08881		DB04849				Organic compounds	Organic oxygen compounds	Organooxygen compounds	Ethers	Diarylethers	1188074	1243791	1427117	978992	1159982	1629824	724871	1678971	1053451	1105016	1894515	2201848	1748817	1736599	1916667	1756791	1704129	1865714	1683689	1336707	7182	9209	3952	12700	6040
87	8.23_245.11	245.113	8.235	[M+H]+	MSI 2	biogenic amines	Pro-Glu	QLROSWPKSBORFJ-BQBZGAKWSA-N	244.245	C10H16N2O5	C1C[C@H](NC1)C(=O)N[C@@H](CCC(=O)O)C(=O)O	194260						CHEBI:74762		Organic compounds	Organic acids and derivatives	Carboxylic acids and derivatives	Amino acids, peptides, and analogues	Peptides	244877	286292	170665	236018	158734	223367	351409	187522	210815	220377	736727	719648	631782	649995	737397	680080	643589	589024	738886	791677	53739652	42671561	50646092	48849359	60197884
88	5.61_247.14	247.144	5.61	[M+H]+	MSI 2	biogenic amines	Lenticin	AOHCBEAZXHZMOR-ZDUSSCGKSA-N	246.305	C14H18N2O2	C[N+](C)(C)[C@@H](CC1=CNC2=CC=CC=C21)C(=O)[O-]	442106	HMDB0061115	C09213				CHEBI:5832		Organic compounds	Organic acids and derivatives	Carboxylic acids and derivatives	Amino acids, peptides, and analogues	Amino acids and derivatives	15849233	20645737	13720367	15179877	13389786	15471030	22198727	15615491	16618834	15168185	38359824	38936808	44139539	41863937	39403502	40500840	38239863	38585657	36486324	36326865	207531	149128	233159	174185	228421
89	3.04_174.10	174.103	3.039	[M+H]+	MSI 2	polyphenols	2-(1H-Pyrazol-1-yl)benzylamine	SJMJUZRSTJBVPG-UHFFFAOYSA-N	173.215	C10H11N3	C1=CC=C(C(=C1)CN)N2C=CC=N2	7015036								Organic compounds	Organoheterocyclic compounds	Azoles	Pyrazoles	Phenylpyrazoles	330694	387732	380937	210690	343954	485507	291053	488087	243786	390543	523245	637358	353633	453431	604267	523976	494044	528726	500794	426154
90	2.40_161.11_2.40_144.08	161.1077_144.0811	2.396_2.396	[M+H]+_[M+H-CH5N]+	MSI 1	polyphenols	Tryptamine	APJYDQYYACXCRM-UHFFFAOYSA-N	160.216	C10H12N2	C1=CC=C2C(=C1)C(=CN2)CCN	1150	HMDB0000303	C00398		DB08653		CHEBI:16765		Organic compounds	Organoheterocyclic compounds	Indoles and derivatives	Tryptamines and derivatives	Tryptamines and derivatives	29514	18165	65873	39597	27944	54918	14821	56762	18379	35902	55940	57463	39304	43902	53648	66861	48574	75801	33439	37766	2854679	4423040	2979157	3900500	4683185
91	1.27_247.14	247.145	1.269	[M+H]+	MSI 2	polyphenols	Lenticin	AOHCBEAZXHZMOR-ZDUSSCGKSA-N	246.305	C14H18N2O2	C[N+](C)(C)[C@@H](CC1=CNC2=CC=CC=C21)C(=O)[O-]	442106	HMDB0061115	C09213				CHEBI:5832		Organic compounds	Organic acids and derivatives	Carboxylic acids and derivatives	Amino acids, peptides, and analogues	Amino acids and derivatives	1325882	1119843	1432704	994789	1232997	1720420	655642	1745565	1108385	1268316	2146034	2497648	2098299	2019588	2168974	2106429	2106741	2305215	2151156	1636054	4373	15388	5287	17593
92	1.11_437.14	437.143	1.11	[M+H]+	MSI 3	polyphenols	1-[2,4-dihydroxy-3-[(2S,3R,4R,5S,6R)-3,4,5-trihydroxy-6-(hydroxymethyl)oxan-2-yl]phenyl]-2-hydroxy-3-(4-hydroxyphenyl)propan-1-one	CSATWRZOLKGPRW-KXIDKYMXSA-N	436.41	C21H24O10	C1=CC(=CC=C1CC(C(=O)C2=C(C(=C(C=C2)O)[C@H]3[C@@H]([C@H]([C@@H]([C@H](O3)CO)O)O)O)O)O)O	21722189								Organic compounds	Phenylpropanoids and polyketides	Linear 1,3-diarylpropanoids	Chalcones and dihydrochalcones	2'-Hydroxy-dihydrochalcones	350846	317074	503313	156600	409877	708875	79295	536336	218668	383335	1059517	1168862	525641	701879	1041289	750442	966698	938942	902828	718561		4714
93	7.22_635.60	635.599	7.224	[M-H]-	MSI 2	lipidomics	AAHFA 41:0;O|AAHFA 15:0/26:0;O	TVVDAQZAWMEXHI-UHFFFAOYSA-N												Organic compounds	Lipids and lipid-like molecules	Fatty Acyls	Fatty acids and conjugates	Very long-chain fatty acids	274900	273695	212408	214847	264926	272338	216747	325228	193422	234869	604798	639084	639606	618506	557890	499907	635976	489069	435752	524401
94	8.43_760.65_8.42_765.60	760.645_765.6021	8.427_8.422	[M+NH4]+_[M+Na]+	MSI 2	lipidomics	TG 44:4|TG 8:0_18:2_18:2	CRYXQZXZHAUBAH-UHFFFAOYSA-N												Organic compounds	Lipids and lipid-like molecules	Glycerolipids	Triradylcglycerols	TG	6574	21475	12091	5090	51086	11561	8047		19256	5037			5798								934637	2088250	1747298	1738103	1940750
95	5.14_355.15	355.155	5.137	[M+H]+	MSI 1	polyphenols	Arnicolide D	NZESEVTYUVXOTC-APDQSUQKSA-N	332.392	C19H24O5	C[C@@H]1C[C@@H]2[C@@H]([C@@H](C(=O)O2)C)[C@@H]([C@]3([C@H]1C=CC3=O)C)OC(=O)C(=C)C	182199								Organic compounds	Lipids and lipid-like molecules	Prenol lipids	Terpene lactones	Sesquiterpene lactones											4432							5098			414235	485849	389182	561259	478361
96	10.36_948.80_10.35_953.76	948.8019_953.7597	10.357_10.353	[M+NH4]+_[M+K]+	MSI 2	lipidomics	TG 58:8|TG 18:1_18:2_22:5	ZMFFWUOLHWWCNZ-UHFFFAOYSA-N												Organic compounds	Lipids and lipid-like molecules	Glycerolipids	Triradylcglycerols	TG					1391		4539		6563												542787	500756	506261	700035	534234
97	10.24_806.76_10.24_811.72	806.7612_811.7156	10.236_10.244	[M+NH4]+_[M+Na]+	MSI 2	lipidomics	TG O-48:2|TG O-16:1_16:0_16:1	ZYSWIEKXFPHIEV-UHFFFAOYSA-N												Organic compounds	Lipids and lipid-like molecules	Glycerolipids	Triradylcglycerols	TG		1927		3252								4520									416843	337955	308137	474981	389690
98	8.87_736.65_8.86_741.60	736.6454_741.6005	8.866_8.86	[M+NH4]+_[M+Na]+	MSI 1	lipidomics	TG 42:2|TG 12:0_12:0_18:2	NGJOPKIPWMIMHJ-UHFFFAOYSA-N												Organic compounds	Lipids and lipid-like molecules	Glycerolipids	Triradylcglycerols	TG	80517	295074	369361	30168	664715	168490	44818	152155	91323	33547	9027	3471	13122		3084		17946	3233	6015	4773	6443362	8518079	9285042	9597499	9912482
99	4.33_453.40	453.395	4.329	[M-H]-	MSI 2	lipidomics	FAHFA 28:0;O|FAHFA 10:0/18:0;O	VJELOLHZHOGTKE-UHFFFAOYSA-N	454.402	C28H54O4	CCCCCCCCCC(CCCCCCCC(=O)O)OC(=O)CCCCCCCCC	133053746								Organic compounds	Lipids and lipid-like molecules	Fatty Acyls	Fatty acids and conjugates	Long-chain fatty acids	12972	19539	27433	12180	27324	20686	13519	23605	29137	13678	48239	35936	63830	27899	64578	42394	53166	38570	53759	55199	2320182	2226386	1999932	1777023	1765710
100	10.71_865.76	865.763	10.711	[M+Na]+	MSI 2	lipidomics	TG O-52:3|TG O-16:1_18:1_18:1	RZFPANUEXINSPS-UHFFFAOYSA-N												Organic compounds	Lipids and lipid-like molecules	Glycerolipids	Triradylcglycerols	TG		6731		4492	14674	5134		8723	7269	4518											773429	927545	674406	815159	645623
101	1.03_341.21	341.212	1.026	[M-H]-	MSI 2	biogenic amines	(15:3)-Anacardic acid	QUVGEKPNSCFQIR-UTOQUPLUSA-N	342.473	C22H30O3	C=CC/C=C\C/C=C\CCCCCCCC1=C(C(=CC=C1)O)C(=O)O	9875131								Organic compounds	Benzenoids	Benzene and substituted derivatives	Benzoic acids and derivatives	Hydroxybenzoic acid derivatives	657083	356179	226759	189281	838228	274592	313084	243202	221880	251422	280308	328613	304167	598364	424274	403104	174734	549892	255088	43121		4098		2473
102	1.19_309.10	309.097	1.194	[M+H-C15H22O10]+	MSI 2	polyphenols	(1aS,1bS,2S,5aR,6S,6aS)-6-((6-Deoxy-2-O-((2E)-3-(3,4-dihydroxyphenyl)prop-2-enoyl)-.alpha.-L-mannopyranosyl)oxy)-1a-(hydroxymethyl)-1a,1b,2,5a,6,6a-hexahydrooxireno[4,5]cyclopenta[1,2-c]pyran-2-yl .beta.-D-glucopyranoside	DZJHQAIWIGSEOY-LAJFDIHTSA-N	670.614	C30H38O17	C[C@H]1[C@@H]([C@H]([C@H]([C@@H](O1)O[C@H]2[C@@H]3C=CO[C@H]([C@@H]3[C@@]4([C@H]2O4)CO)O[C@H]5[C@@H]([C@H]([C@@H]([C@H](O5)CO)O)O)O)OC(=O)/C=C/C6=CC(=C(C=C6)O)O)O)O	14263156								Organic compounds	Phenylpropanoids and polyketides	Cinnamic acids and derivatives	Hydroxycinnamic acids and derivatives	Coumaric acids and derivatives	5392	4405			10266	15320				14781		6640	7315	11788	7478	7777	7028	5706	6466	7764	681903	825098	926546	920488	1233284
103	6.44_597.39	597.395	6.441	[M+K]+	MSI 1	polyphenols	Astaxanthin	MQZIGYBFDRPAKN-UWFIBFSHSA-N	596.84	C40H52O4	CC1=C(C(C[C@@H](C1=O)O)(C)C)/C=C/C(=C/C=C/C(=C/C=C/C=C(/C=C/C=C(/C=C/C2=C(C(=O)[C@H](CC2(C)C)O)C)\C)\C)/C)/C	5281224	HMDB0002204	C08580	LMPR01070263			CHEBI:40968	CPD-7847	Organic compounds	Lipids and lipid-like molecules	Prenol lipids	Tetraterpenoids	Carotenoids	15309	36927	30407		6480		29251	11101	35132	12738	25714		8965		35572	20835	15869	20425	49641	20382	1201438	1580289	1336121	1801524	2077177
104	1.00_327.23	327.233	1.002	[M-H]-	MSI 1	biogenic amines	DHA	ZJDMTWUYUXJUEE-BMJXUZCVSA-N	222.149	C7H10O8	C1[C@H]([C@H]([C@H](OC1(C(=O)O)O)C(=O)O)O)O	15608515								Organic compounds	Organic oxygen compounds	Organooxygen compounds	Carbohydrates and carbohydrate conjugates	Glycosyl compounds	1473		1421	2807	1587			1186	1994			2152									132203	167775	132596	100597	148196
105	4.60_482.46_4.60_464.45	482.4567_464.4461	4.598_4.6	[M+H]+_[M+H-H2O]+	MSI 2	lipidomics	Cer 30:1;O2|Cer 18:1;O2/12:0	HXFPPRPLRSPNIB-UHFFFAOYSA-N	481.795	C30H59NO3	CCCCCCCCCCCCCC=CC(C(CO)NC(=O)CCCCCCCCCCC)O	53901181								Organic compounds	Lipids and lipid-like molecules	Sphingolipids	Ceramides	Ceramides	4586	10426	4939	7803	7554	7559	7680	4717		8108	31234	29313	55031		33618	53819	19270	31096	25349	40100	1172801	1023352	1316008	999917	1234806
106	2.44_477.25_2.43_513.23	477.2499_513.2264	2.441_2.434	[M-H]-_[M+Cl]-	MSI 2	biogenic amines	1H-Benz[e]indene-6-propanoic acid, dodecahydro-2-hydroxy-7-(1-hydroxy-1-methylethyl)-9b-(methoxycarbonyl)-2,3a,6,9a-tetramethyl-4-methylene-1,3-dioxo-	ARHZXCIVYQVVOK-UHFFFAOYSA-N	478.576	C26H38O8	CC12CCC(C(C1CC(=C)C3(C2(C(=O)C(C3=O)(C)O)C(=O)OC)C)(C)CCC(=O)O)C(C)(C)O	45782807								Organic compounds	Lipids and lipid-like molecules	Fatty Acyls	Eicosanoids	Prostaglandins and related compounds	873366	829688	508406	531615	479028	738733	826054	499252	722343	705119	993358	1634286	1723209	1613587	1693978	1810603	1683411	1759780	1215972	1994495	9211	5917	4051	3941
107	2.31_175.09	175.087	2.309	[M+H-H2O]+	MSI 2	polyphenols	3-(4-Formylaminobutyryl)pyridine	VBBSCQOGXSQFNC-UHFFFAOYSA-N	192.215	C10H12N2O2	C1=CC(=CN=C1)C(=O)CCCNC=O	3684366								Organic compounds	Organic oxygen compounds	Organooxygen compounds	Carbonyl compounds	Ketones	457579	500843	598393	349906	582091	807555	386634	785472	341552	508893	879978	1097513	552956	728648	1103568	855023	866398	963086	840971	756016	3676			3387
108	2.56_305.25	305.248	2.558	[M-H]-	MSI 1	lipidomics	FA 20:3 (eicosatrienoic acid)	UNSRRHDPHVZAHH-WYTUUNCASA-N	306.484	C20H34O2	CCCCCCCC/C=C/C/C=C/C/C=C/CCCC(=O)O	5282825			LMFA01030157					Organic compounds	Lipids and lipid-like molecules	Fatty Acyls	Fatty acids and conjugates	Long-chain fatty acids	668307	742871	636859	486416	701557	739794	791820	901001	620164	598457	2301429	1978114	1890994	2599836	1627141	1953914	2070613	2027375	1792361	2056774	104137437	112754467	114663077	97533788	96590988
109	6.05_728.60_6.06_750.58	728.6029_750.5845	6.047_6.058	[M+H]+_[M+Na]+	MSI 2	lipidomics	HexCer 36:1;2O|HexCer 18:1;2O/18:0	YMYQEDCYNANIPI-UHFFFAOYSA-N	728.096	C42H81NO8	CCCCCCCCCCCCCCCCCC(=O)NC(COC1C(C(C(C(O1)CO)O)O)O)C(C=CCCCCCCCCCCCCC)O	4517717								Organic compounds	Lipids and lipid-like molecules	Sphingolipids	Glycosphingolipids	HexCer		8890							11610		12328					8803	10892				652594	506682	670626	685940	875055
110	10.26_837.73	837.731	10.261	[M+Na]+	MSI 2	lipidomics	TG O-50:3|TG O-14:1_18:1_18:1	IDBJFFMPJMCQAN-UHFFFAOYSA-N												Organic compounds	Lipids and lipid-like molecules	Glycerolipids	Triradylcglycerols	TG	4037					5180															488332	551072	267432	619885	435025
111	5.77_369.13	369.134	5.774	[M+H]+	MSI 1	polyphenols	(1E,4Z,6E)-5-hydroxy-1,7-bis(4-hydroxy-3-methoxyphenyl)hepta-1,4,6-trien-3-one	ZIUSSTSXXLLKKK-KOBPDPAPSA-N	368.381	C21H20O6	COC1=C(C=CC(=C1)/C=C/C(=C/C(=O)/C=C/C2=CC(=C(C=C2)O)OC)/O)O	5281767		C10443					CPD-6602	Organic compounds	Phenylpropanoids and polyketides	Diarylheptanoids	Linear diarylheptanoids	Curcuminoids	883691	6053452	2520335	2678118	1265389	1989879	980722	2739274	702325	1252750	1934357	3142631	1232473	1836704	1798407	1843826	1525620	1980104	1346778	1208617		16161			75685
112	9.45_790.69_9.45_795.65	790.6919_795.648	9.45_9.452	[M+NH4]+_[M+Na]+	MSI 1	lipidomics	TG 46:3 |TG 10:0_18:1_18:2	KJTNBMXTRCBORQ-UHFFFAOYSA-N												Organic compounds	Lipids and lipid-like molecules	Glycerolipids	Triradylcglycerols	TG	16583	26751	104460	6865	98308	33003	12223	20605	84630	8500	9667	2705	6445	13826	2641			3471	7394		2186362	2683838	3148500	2698007	2447543
113	2.96_480.41	480.405	2.958	[M+H]+	MSI 2	lipidomics	CAR 22:2	LDIMXAXYWUCEAM-UHFFFAOYSA-N												Organic compounds	Lipids and lipid-like molecules	Fatty Acyls	Fatty esters	Fatty acyl carnitines		6197	11513	4709		9943		10215	9752	5250	7081	7519	11020		5063	11352	9652	5181	4734	4329	626148	613191	548397	643293	613635
114	1.91_227.08	227.082	1.914	[M+H]+	MSI 2	polyphenols	Ethyl 2-(allylamino)-4-methyl-1,3-thiazole-5-carboxylate	LOGDHFSRTYALOP-UHFFFAOYSA-N	226.297	C10H14N2O2S	CCOC(=O)C1=C(N=C(S1)NCC=C)C	1867630								Organic compounds	Organoheterocyclic compounds	Azoles	Thiazoles	Thiazolecarboxylic acids and derivatives	614923	581849	644378	428155	649055	954396	444068	932158	382882	639381	1179821	1323139	778253	937132	1261973	997549	1109140	1191948	1082794	945164	9477	4746
115	8.00_598.58	598.577	8.002	[M+NH4]+	MSI 2	lipidomics	DG O-34:1|DG O-16:0_18:1	ZDRGKGZHXIWXJD-UHFFFAOYSA-N	580.967	C37H72O4	CCCCCCCCCCCCCCCCOCC(CO)OC(=O)CCCCCCCC=CCCCCCCCC									Organic compounds	Lipids and lipid-like molecules	Glycerolipids	Diradylglycerols	1-alkyl,2-acylglycerols	4788	5929	4609	4116	8086		5233	6986	1875	4071										4333	758881	808781	864855	732263	898854
116	5.47_775.53	775.533	5.472	[M+Na]+	MSI 2	lipidomics	DG 47:13	CSKPOXDJPWJHHX-UHFFFAOYSA-N												Organic compounds	Lipids and lipid-like molecules	Glycerolipids	Diradylglycerols	DG	605651	795660	744783	628914	643379	962305	622442	861112	768822	791359	896257	823649	732521	743180	863824	741408	1361767	627292	737004	1572110			7927		8904
117	5.62_157.06	157.061	5.619	[M+H]+	MSI 2	biogenic amines	5-Hydroxymethyl-6-methyluracil	XBAVGYMDOXCWQU-UHFFFAOYSA-N	156.14	C6H8N2O3	CC1=C(C(=O)NC(=O)N1)CO	8983	HMDB0000544							Organic compounds	Organoheterocyclic compounds	Diazines	Pyrimidines and pyrimidine derivatives	Pyrimidones				3266					3601				6741	5952	7851		4188	6411		10295	518586	374025	464239	417820	549555
118	6.27_331.26	331.264	6.267	[M+H]+	MSI 2	polyphenols	cis-7,10,13,16,19-Docosapentaenoic acid	YUFFSWGQGVEMMI-JLNKQSITSA-N	330.505	C22H34O2	CC/C=C\C/C=C\C/C=C\C/C=C\C/C=C\CCCCCC(=O)O	5497182	HMDB0006528	C16513	LMFA04000044			CHEBI:53488		Organic compounds	Lipids and lipid-like molecules	Fatty Acyls	Fatty acids and conjugates	Very long-chain fatty acids		15553		17065					9753		13690			16237			15008	36578	14753	16780	511470	921597	616503	717603	1052736
119	4.93_384.22	384.217	4.926	[M+H-H2O]+	MSI 2	biogenic amines	Antibiotic F 1839A	RUBLIKRGQGISNL-GJFQRQSPSA-N	401.503	C23H31NO5	C[C@H]1CC[C@H]2[C@]([C@]13CC4=C(C=C5C(=C4O3)CNC5=O)O)(C[C@@H]([C@@H](C2(C)C)O)O)C	133556413								Organic compounds	Organoheterocyclic compounds	Isoindoles and derivatives	Isoindolines	Isoindolones	499150	456816	352428	372948	364451	397254	542261	425065	424109	401896	1038165	1147791	1287263	1011779	933504	900317	918079	1060381	736381	792652			8409
120	3.15_383.30	383.296	3.145	[M-H]-	MSI 2	lipidomics	Hexacosahexaenoic acid	SEWCVOZMZWXWNV-UHFFFAOYSA-N	384.604	C26H40O2	CCCCCCCCCCCCCC=CC=CC=CC=CC=CC=CC(=O)O	129727323								Organic compounds	Lipids and lipid-like molecules	Fatty Acyls	Fatty acids and conjugates	Very long-chain fatty acids																				4871	354096	401889	337642	266353	278264
121	2.18_315.16	315.158	2.18	[M+H]+	MSI 2	polyphenols	cis-Dehydrocrotonin	PHTWCRQCDPNVLQ-PITHAFQJSA-N	314.381	C19H22O4	C[C@@H]1CC[C@H]2[C@@H]([C@@]13C[C@@H](OC3=O)C4=COC=C4)CC(=O)C=C2C	101616216								Organic compounds	Lipids and lipid-like molecules	Prenol lipids	Terpene lactones	Diterpene lactones	540402	502302	611128	426784	542101	930571	308230	797010	421611	525604	801700	1025656	831058	747547	969622	839989	931162	1027127	1086932	701097	12204	3712	4106	6687	10252
122	2.05_414.36	414.358	2.046	[M+H]+	MSI 2	lipidomics	CAR 17:0	DWSFAVOTORHAAL-UHFFFAOYSA-N	413.635	C24H47NO4	CCCCCCCCCCCCCCCCC(=O)OC(CC(=O)[O-])C[N+](C)(C)C	53477803	HMDB0006210							Organic compounds	Lipids and lipid-like molecules	Fatty Acyls	Fatty acid esters	Acyl carnitines	4667	11999	15217	4695	3461	3560	15521	4286	5102	4108	3323	18574	16799		4749	2108	5223		16574	8270	435699	484314	351494	425517	374141
123	3.19_219.10	219.102	3.189	[M+H-H2O]+	MSI 2	polyphenols	Carboxyibuprofen	DIVLBIVDYADZPL-UHFFFAOYSA-N	236.264	C13H16O4	CC(CC1=CC=C(C=C1)C(C)C(=O)O)C(=O)O	10444113	HMDB0060564							Organic compounds	Phenylpropanoids and polyketides	Phenylpropanoic acids		Phenylpropanoic acids		2119	6074	4327	7812	9719	4199	7178		7746	26877	34521	17142	7605	39619	26806	42464	38673	33444	30495	829292	1096464	657105	1162010	992993
124	3.68_142.10	142.097	3.679	[M+H]+	MSI 2	biogenic amines	L-Histidinol	ZQISRDCJNBUVMM-YFKPBYRVSA-N	141.171	C6H11N3O	C1=C(NC=N1)C[C@@H](CO)N	165271	HMDB0003431	C00860				CHEBI:16255		Organic compounds	Organic nitrogen compounds	Organonitrogen compounds	Amines	Aralkylamines	148462	229814	174119	157548	159603	145754	178496	165962	205716	124703	315865	302615	317649	239643	128551	282330	280726	216626	224324	270185	16545068	12437097	16641397	15306594	18364361
125	9.41_764.68_9.42_769.63	764.6765_769.632	9.412_9.419	[M+NH4]+_[M+Na]+	MSI 1	lipidomics	TG 44:2|TG 12:0_14:0_18:2	LXHJRBQAAZJFFA-UHFFFAOYSA-N												Organic compounds	Lipids and lipid-like molecules	Glycerolipids	Triradylcglycerols	TG	64305	113729	125557	66437	146086	181010	138902	52061	168366	44789	12375	3862	38780	15880	33812	7176	15903	6007	4643	4443	7073665	6120690	11503292	10094596	8912325
126	7.87_425.16	425.163	7.869	[M+Na]+	MSI 2	biogenic amines	(7-Hydroxy-7-methyl-8-oxo-3-propyl-5,6-dihydro-1H-isochromen-6-yl) 2-hydroxy-4-methoxy-6-methylbenzoate	PHCSXGHZIAKXHR-UHFFFAOYSA-N	402.438	C22H26O7	CCCC1=CC2=C(CO1)C(=O)C(C(C2)OC(=O)C3=C(C=C(C=C3C)OC)O)(C)O	45782800								Organic compounds	Organoheterocyclic compounds	Azaphilones		Azaphilones	9944	5493	10731	4895	7206	6916	7473	15378	13622	3681	7130	6658	39706		36438		11788			11352	690002	706868	638100	524649	640583
127	5.03_161.11	161.107	5.028	[M+H]+	MSI 1	biogenic amines	Tryptamine	APJYDQYYACXCRM-UHFFFAOYSA-N	160.216	C10H12N2	C1=CC=C2C(=C1)C(=CN2)CCN	1150	HMDB0000303	C00398		DB08653		CHEBI:16765		Organic compounds	Organoheterocyclic compounds	Indoles and derivatives	Tryptamines and derivatives	Tryptamines and derivatives	4962		3237				3307	3513		3871		8353			7629	7007	6943		11924	7102	495095	438928	453469	486380	601419
128	1.04_423.16	423.164	1.043	[M+H]+	MSI 2	polyphenols	Calealactone B	BRBRVKOYZAMSBL-PXFMFDQNSA-N	422.427	C21H26O9	C[C@@H]1C[C@@H]2[C@@H]([C@@H]([C@H]([C@@](C(=O)[C@@H]3[C@H]1O3)(C)O)OC(=O)C)OC(=O)C(=C)C)C(=C)C(=O)O2	11464346								Organic compounds	Lipids and lipid-like molecules	Prenol lipids	Terpene lactones	Sesquiterpene lactones	366506	388408	501884	247995	375986	660338	189155	526689	326059	395124	850541	1010706	543388	626757	879912	663511	837259	857418	879430	653656		4573
129	6.66_257.21	257.212	6.66	[M+H-H2O]+	MSI 2	polyphenols	MG 12:0	ARIWANIATODDMH-AWEZNQCLSA-N	274.397	C15H30O4	CCCCCCCCCCCC(=O)OC[C@H](CO)O	656773		C13854	LMGL01010008			CHEBI:75529		Organic compounds	Lipids and lipid-like molecules	Glycerolipids	Monoradylglycerols	Monoacylglycerols			6299		5159	8227				6450	4356	6370							6348		802859	1192910	2633299	1142743	1255480
130	6.75_531.41	531.406	6.753	[M+H]+	MSI 2	polyphenols	D-.alpha.-Tocopherol succinate	IELOKBJPULMYRW-UHFFFAOYSA-N	530.78	C33H54O5	CC1=C(C(=C(C2=C1OC(CC2)(C)CCCC(C)CCCC(C)CCCC(C)C)C)OC(=O)CCC(=O)O)C	425400	HMDB0033685							Organic compounds	Lipids and lipid-like molecules	Prenol lipids	Quinone and hydroquinone lipids	Vitamin E compounds	13516765	18185199	20822605	12806275	14460093	21356264	9940519	19122548	11628897	12739717	15464839	19580489	12951588	18719359	20724880	19595782	18876640	21432204	19657623	15737693	190877	238728	302751	206321	305793
131	12.28_992.96_12.28_997.91	992.9589_997.9142	12.281_12.282	[M+NH4]+_[M+Na]+	MSI 2	lipidomics	TG 60:0|TG 18:0_20:0_22:0	HFAVJFLUFWVWGB-UHFFFAOYSA-N	974.924	C63H122O6	CCCCCCCCCCCCCCCCCCCCCC(=O)OCC(COC(=O)CCCCCCCCCCCCCCCCC)OC(=O)CCCCCCCCCCCCCCCCCCC	132977329								Organic compounds	Lipids and lipid-like molecules	Glycerolipids	Triradylcglycerols	TG	16833622	11862383	5116186	9974575	12528334	6468382	6744244	7067683	9812012	13565053	8602286	9892862	6560418	12049626	8910089	10034332	12192398	12535283	10552661	15233491	309903	819617	273793	108148	7100
132	5.66_611.51	611.505	5.655	[M-H]-	MSI 2	lipidomics	FAHFA 40:5;O|FAHFA 22:5/18:0;O	SUQHWTGMQSRDBK-UHFFFAOYSA-N												Organic compounds	Lipids and lipid-like molecules	Fatty Acyls	Fatty acids and conjugates	Long-chain fatty acids	17423	14830	8930	10675	11519	16425	8166	11305	9502	9507	17988	9656	42491	19108	21501	14994	28772	11293	14025	8156	628405	840420	473180	487792	729404
133	4.54_479.41	479.411	4.544	[M-H]-	MSI 2	lipidomics	FAHFA 30:1;O|FAHFA 12:0/18:1;O	NFUMZUPRNACHCW-UHFFFAOYSA-N												Organic compounds	Lipids and lipid-like molecules	Fatty Acyls	Fatty acids and conjugates	Long-chain fatty acids		3742		4102	9221	4012		4318		3171	8418	11598	5332	18862	6726	5005	14187	11513	11734	15785	279786	238808	281268	246256	255768
134	8.17_463.45	463.452	8.169	[M-H]-	MSI 2	lipidomics	Hentriacontenoic acid	GHCWLAYQAFCWCT-UHFFFAOYSA-N	464.808	C31H60O2	CCCCCCCCCCCCCCCCCCCCCCCCCCCCC=CC(=O)O	53838072								Organic compounds	Lipids and lipid-like molecules	Fatty Acyls	Fatty acids and conjugates	Very long-chain fatty acids	4253	9077	598	4000			4405			8721	4708	6760	8687	12383	13305	11493	6907	17877	11923	16081	583408	500354	454969	452333	405859
135	10.73_950.82_10.72_955.77	950.8173_955.7717	10.726_10.718	[M+NH4]+_[M+H]+	MSI 2	lipidomics	TG 58:7|TG 18:1_18:1_22:5	XSJRKDQVEHTWNV-UHFFFAOYSA-N	932.783	C61H104O6	CCCCCCCCC=CCCCCCCCC(=O)OCC(COC(=O)CCCCCC=CCC=CCC=CCC=CCC=CCC)OC(=O)CCCCCCCC=CCCCCCCCC	85035481								Organic compounds	Lipids and lipid-like molecules	Glycerolipids	Triradylcglycerols	TG	4483	9514	7196	4464	12994	2728	69005	35725					7305								536543	627516	603895	1079452	539410
136	8.18_171.09	171.088	8.18	[Cat]+	MSI 2	biogenic amines	Linsidomine cation	XZYRDNUZENBYFI-UHFFFAOYSA-N	171.177	C6H11N4O2	C1COCCN1[N+]2=NOC(=C2)N	65388								Organic compounds	Organoheterocyclic compounds	Oxazinanes	Morpholines	Morpholines																				4140	263745	210074	250730	244092	305325
137	2.45_309.10	309.096	2.447	[M+Na]+	MSI 2	biogenic amines	(1aS,1bS,2S,5aR,6S,6aS)-6-((6-Deoxy-2-O-((2E)-3-(3,4-dihydroxyphenyl)prop-2-enoyl)-.alpha.-L-mannopyranosyl)oxy)-1a-(hydroxymethyl)-1a,1b,2,5a,6,6a-hexahydrooxireno[4,5]cyclopenta[1,2-c]pyran-2-yl .beta.-D-glucopyranoside	DZJHQAIWIGSEOY-LAJFDIHTSA-N	670.614	C30H38O17	C[C@H]1[C@@H]([C@H]([C@H]([C@@H](O1)O[C@H]2[C@@H]3C=CO[C@H]([C@@H]3[C@@]4([C@H]2O4)CO)O[C@H]5[C@@H]([C@H]([C@@H]([C@H](O5)CO)O)O)O)OC(=O)/C=C/C6=CC(=C(C=C6)O)O)O)O	14263156								Organic compounds	Phenylpropanoids and polyketides	Cinnamic acids and derivatives	Hydroxycinnamic acids and derivatives	Coumaric acids and derivatives	6386		6098		4474			5199	12882	4819	7025	9069	18831	11097	12426	10791					507659	542871	548815	513808	565527
138	3.34_482.42	482.421	3.343	[M+H]+	MSI 2	lipidomics	CAR 22:1	WDWXOVLPQSTGNY-UHFFFAOYSA-N												Organic compounds	Lipids and lipid-like molecules	Fatty Acyls	Fatty esters	Fatty acyl carnitines	12882	17788		8232	4607	5544	11331	5610	12287	6443	34633	32906	61007		29300	33002	39026	40531	34117	87014	1288377	1610662	1565468	1207347	1120127
139	4.60_500.43_4.60_505.39	500.4312_505.3866	4.597_4.599	[M+NH4]+_[M+Na]+	MSI 2	lipidomics	DG 26:1|DG 8:0_18:1	KJIDXLFNTLKOKK-UHFFFAOYSA-N	482.737	C29H54O5	CCCCCCCCC=CCCCCCCCC(=O)OC(CO)COC(=O)CCCCCCC	53997766								Organic compounds	Lipids and lipid-like molecules	Glycerolipids	Diradylglycerols	DG	3834		4879		3967	8683				4056			3317								488228	534225	694590	673017	565619
140	6.23_329.25	329.248	6.228	[2M+H]+	MSI 1	polyphenols	Totarol Acetate	ORVBSFQTFRBNRP-UHFFFAOYSA-N	328.489	C22H32O2	CC(C)C1=C(C=CC2=C1CCC3C2(CCCC3(C)C)C)OC(=O)C	623264								Organic compounds	Lipids and lipid-like molecules	Prenol lipids	Diterpenoids	Diterpenoids			2837	17042	3043	22711	12076	40146			31632	22223			44746	44334	11927		41015	19851	921098	1484381	1008194	1068219	1098593
141	5.13_507.40	507.402	5.129	[M+Na]+	MSI 2	lipidomics	DG 26:0	OTXDUPRFHFQSSG-UHFFFAOYSA-N	484.753	C29H56O5	CCCCCCCCCCCCCCCCCC(=O)OCC(CO)OC(=O)CCCCCCC	54169333								Organic compounds	Lipids and lipid-like molecules	Glycerolipids	Diradylglycerols	DG	31579	36607	44827	24106	34568	47654	18421	43197	11242	34423	9658	27094	21520	47169	5115	21475	14141		6641	21246	1687863	1801155	2264758	2711735	2292054
142	10.65_837.73_10.65_832.78	837.7308_832.7754	10.654_10.653	[M+Na]+_[M+NH4]+	MSI 2	lipidomics	DG 50:3	QOLWLTFPGHNFKP-UHFFFAOYSA-N												Organic compounds	Lipids and lipid-like molecules	Glycerolipids	Diradylglycerols	DG					18254	4948	9889	5561		9122											662141	604359	757267	641443	591529
143	0.59_207.07	207.066	0.592	[M+H-C2H6O]+	MSI 2	polyphenols	[3-Ethoxy-4-(ethoxycarbonyl)phenyl]acetic acid	OTGSESBEJUHCES-UHFFFAOYSA-N	252.264	C13H16O5	CCOC1=C(C=CC(=C1)CC(=O)O)C(=O)OCC	10131212								Organic compounds	Benzenoids	Benzene and substituted derivatives	Benzoic acids and derivatives	Benzoic acid esters	17913	12818	11836	14914	24031	20902		7842	8871	6605	1140861	24741	16038	14493	34608	1017689	12059	18802		860645	987791	1301462	851180	1287638	1311599
144	8.42_781.57	781.575	8.422	[M+Na]+	MSI 2	lipidomics	DG 47:10	GPQKHIJZOQBYHF-UHFFFAOYSA-N												Organic compounds	Lipids and lipid-like molecules	Glycerolipids	Diradylglycerols	DG		5154																			191378	765161	366655	356556	461716
145	2.01_162.06	162.055	2.011	[M+H]+	MSI 2	biogenic amines	3-Aminocoumarin	QWZHDKGQKYEBKK-UHFFFAOYSA-N	161.158	C9H7NO2	C1=CC=C2C(=C1)C=C(C(=O)O2)N	74217								Organic compounds	Phenylpropanoids and polyketides	Coumarins and derivatives		Coumarins and derivatives					12619																712336	680467	680139	724019	719912
146	6.62_439.38	439.379	6.624	[M+H-H2O]+	MSI 2	polyphenols	.alpha.,.alpha.'-Dilaurin	KUVAEMGNHJQSMH-UHFFFAOYSA-N	456.7	C27H52O5	CCCCCCCCCCCC(=O)OCC(COC(=O)CCCCCCCCCCC)O	101758	HMDB0093028							Organic compounds	Lipids and lipid-like molecules	Glycerolipids	Diradylglycerols	DG			993	1600	6167	4384							10615								54152	97707	2743498	1272955	1244354
147	3.51_244.17	244.171	3.507	[M+H]+	MSI 2	polyphenols	3-Hydroxymorphinan	IYNWSQDZXMGGGI-NUEKZKHPSA-N	243.345	C16H21NO	C1CC[C@@]23CCN[C@@H]([C@@H]2C1)CC4=C3C=C(C=C4)O	5463854								Organic compounds	Alkaloids and derivatives	Morphinans		Morphinans	533073	605395	648299	363315	476039	643129	512866	717640	389560	477288	678961	789397	516634	721449	768982	751422	641166	748660	690035	586489				4882
148	8.81_329.13	329.135	8.806	[M+Na]+	MSI 2	biogenic amines	Yuehgesin C	ZEJUDJOXRYEYKX-UHFFFAOYSA-N	306.354	C17H22O5	CCOC(C)(C)C(CC1=C(C=CC2=C1OC(=O)C=C2)OC)O	5319451								Organic compounds	Phenylpropanoids and polyketides	Coumarins and derivatives		Coumarins and derivatives	30921	24558	31405	14799	10183	46649	49098	60091	37339	13296	68483	38583	72457	23276	53485	74932	20886	112555	40302	69325	2633306	1874998	2572584	2130016	2706145
149	4.15_503.37_4.15_498.42	503.3706_498.4153	4.15_4.15	[M+Na]+_[M+NH4]+	MSI 2	lipidomics	DG 26:2|DG 8:0_18:2	BGDIOBIONVKNIY-UHFFFAOYSA-N	480.721	C29H52O5	CCCCCCCC(=O)OCC(CO)OC(=O)CCCCCCCC=CCC=CCCCCC	91589731								Organic compounds	Lipids and lipid-like molecules	Fatty Acyls	Lineolic acids and derivatives	Lineolic acids and derivatives	3763	5750	6707		16626	12262	4653	3556									3471			4526	534869	564057	851053	758731	585268
150	3.65_216.03_3.64_276.06	216.0332_276.0625	3.655_3.636	[M-H-CO2]-_[M-H]-	MSI 2	biogenic amines	2,3-Dimethoxy-5-sulfamoylbenzoic acid	YEVQOPOKMKTXMD-UHFFFAOYSA-N	261.253	C9H11NO6S	COC1=CC(=CC(=C1OC)C(=O)O)S(=O)(=O)N	3017698								Organic compounds	Benzenoids	Benzene and substituted derivatives	Benzoic acids and derivatives	Methoxybenzoic acids and derivatives	49835	54466	52930	41276	23525	39746	63257	28526	54830	40121	115418	136639	143226	109486	113304	108473	119986	115172	98583	123273	5057886	2488694	3129920	3971183	5045590
151	12.30_1006.97	1006.97	12.3	[M+NH4]+	MSI 2	lipidomics	TG 61:0|TG 18:0_21:0_22:0	VCTVDXJMAPSLAW-UHFFFAOYSA-N	988.94	C64H124O6	CCCCCCCCCCCCCCCCCCCCCC(=O)OCC(COC(=O)CCCCCCCCCCCCCCCCC)OC(=O)CCCCCCCCCCCCCCCCCCCC	138277981								Organic compounds	Lipids and lipid-like molecules	Glycerolipids	Triradylcglycerols	TG	372591	349365	144052	216922	255909	146120	183075	169636	212864	325427	186001	208707	168180	394148	230033	245153	276149	340064	244208	295610
152	9.21_879.74	879.741	9.212	[M+Na]+	MSI 2	lipidomics	TG 52:3|TG 16:1_18:1_18:1	YBWITEZBUYUNFC-UHFFFAOYSA-N	856.752	C55H100O6	CCCCCCCCC=CCCCCCCCC(=O)OCC(COC(=O)CCCCCCCC=CCCCCCC)OC(=O)CCCCCCCC=CCCCCCCCC	85034386								Organic compounds	Lipids and lipid-like molecules	Glycerolipids	Triradylcglycerols	TG	5318		4175			6065									3923						589442	508146	507646	602853	542893
153	3.45_438.24	438.24	3.454	[M+H]+	MSI 1	polyphenols	Lunarine	YIWJEBPTHXRHQF-LLMLIWGDSA-N	437.532	C25H31N3O4	C1CCNC(=O)/C=C/[C@]23CCC(=O)C[C@H]2OC4=C3C=C(C=C4)/C=C/C(=O)NCCCNC1	6477011		C10603				CHEBI:6566		Organic compounds	Phenylpropanoids and polyketides	Macrolactams		Macrolactams		2877	7837					4910			6102	9510		5552		8106	12020	8826	4599	1503	253542	308728	318990	387042	376898
154	5.62_107.05	107.049	5.623	[M+H-C5H8O]+	MSI 2	biogenic amines	4-Hydroxy-3-(3-methyl-2-butenyl)benzaldehyde	XHFURSFUHFDPTB-UHFFFAOYSA-N	190.239	C12H14O2	CC(=CCC1=C(C=CC(=C1)C=O)O)C	443853		C12459				CHEBI:31110		Organic compounds	Organic oxygen compounds	Organooxygen compounds	Carbonyl compounds	Aldehydes	282664	323320	281942	232325	253325	270757	398817	257763	272233	218028	763408	796545	816882	825380	771771	821022	758334	804650	800283	720141	12909	7642	7115	6708	9661
155	12.33_1020.99_12.33_1025.94	1020.9904_1025.9448	12.327_12.329	[M+NH4]+_[M+Na]+	MSI 2	lipidomics	TG 62:0|TG 18:0_22:0_22:0	JFYAITPMPUPERR-UHFFFAOYSA-N	1002.96	C65H126O6	CCCCCCCCCCCCCCCCCCCCCC(=O)OCC(COC(=O)CCCCCCCCCCCCCCCCC)OC(=O)CCCCCCCCCCCCCCCCCCCCC	132978986								Organic compounds	Lipids and lipid-like molecules	Glycerolipids	Triradylcglycerols	TG	35199296	40480889	12605748	23878911	23674142	13067231	16943870	16914858	22070123	37218627	20388196	18212808	11473335	36276876	15711702	27862538	23943491	30753310	23791381	27725723	748565	1691903	466526	186307	184200
156	6.41_154.01	154.014	6.413	[M-H]-	MSI 2	biogenic amines	Citrazinic acid	CSGQJHQYWJLPKY-UHFFFAOYSA-N	155.108	C6H5NO4	C1=C(C=C(NC1=O)O)C(=O)O	7425								Organic compounds	Organoheterocyclic compounds	Pyridines and derivatives	Pyridinecarboxylic acids and derivatives	Pyridinecarboxylic acids	10055	10571	9565	10026	8081	9234	14674	7653	11621	9164	16070	13575	14605	17329	11971	20121	10414	16808	11520	16013	528333	377598	474152	536391	577427
157	10.72_891.78	891.778	10.719	[M+Na]+	MSI 2	lipidomics	TG O-54:4|TG O-18:1_18:1_18:2	BNOQPFWRMHCRRN-UHFFFAOYSA-N												Organic compounds	Lipids and lipid-like molecules	Glycerolipids	Triradylcglycerols	TG										5680								4685	6808		899121	1154812	842956	1126700	838327
158	1.65_327.23_1.67_363.21	327.2328_363.2097	1.654_1.669	[M-H]-_[M+Cl]-	MSI 1	lipidomics	FA 22:6 (docosahexaenoic acid)	MBMBGCFOFBJSGT-KUBAVDMBSA-N	328.489	C22H32O2	CC/C=C\C/C=C\C/C=C\C/C=C\C/C=C\C/C=C\CCC(=O)O	445580	HMDB0002183	C06429	LMFA01030185			CHEBI:28125		Organic compounds	Lipids and lipid-like molecules	Fatty Acyls	Fatty acids and conjugates	Very long-chain fatty acids	678195	703235	591593	743512	753026	665220	673348	827511	583071	985967	1757297	1746535	1959367	2019825	1540439	1563346	1766141	1258568	1543756	2043187	53031622	74672111	51972109	58542249	52354745
159	10.77_640.60_10.76_645.56	640.6031_645.5581	10.768_10.764	[M+NH4]+_[M+Na]+	MSI 1	lipidomics	CE 16:1	HODJWNWCVNUPAQ-XDOSKZMUSA-N	623.048	C43H74O2	CCCCCC/C=C\CCCCCCCC(=O)O[C@H]1CC[C@@]2([C@H]3CC[C@]4([C@H]([C@@H]3CC=C2C1)CC[C@@H]4[C@H](C)CCCC(C)C)C)C	13828666			LMST01020006			CHEBI:84323		Organic compounds	Lipids and lipid-like molecules	Sterol lipids	Steroid esters	Cholesteryl esters	3835							5159	6826										3781		389445	1104635	325084	456584	430222
160	7.47_428.37	428.375	7.472	[M+H]+	MSI 2	polyphenols	CAR 18:0	FNPHNLNTJNMAEE-HSZRJFAPSA-N	427.662	C25H49NO4	CCCCCCCCCCCCCCCCCC(=O)O[C@H](CC(=O)[O-])C[N+](C)(C)C	52922056			LMFA07070008			CHEBI:84644		Organic compounds	Lipids and lipid-like molecules	Fatty Acyls	Fatty acid esters	Acyl carnitines	338736	59570	73986	131007	81715	128226	90440	123800	79198	64697	88071	106010	80633	72160	224627	47808	63320	94110	53929	146194	3517573	4655298	4522365	5793343	4930432
161	7.04_289.21	289.212	7.044	[M+H]+	MSI 2	biogenic amines	5.alpha.-Androstane-3,17-dione	RAJWOBJTTGJROA-WZNAKSSCSA-N	288.425	C19H28O2	C[C@]12CCC(=O)C[C@@H]1CC[C@@H]3[C@@H]2CC[C@]4([C@H]3CCC4=O)C	222865	HMDB0000899	C00674	LMST02020085	DB01561		CHEBI:15994	CPD-342	Organic compounds	Lipids and lipid-like molecules	Sterol lipids	Androstane steroids	Androgens and derivatives			6132			4187	9081									6205	5543				307795	276584	296399	309533	382976
162	5.40_549.41_5.39_544.46	549.4127_544.4575	5.396_5.39	[M+Na]+_[M+NH4]+	MSI 2	lipidomics	TG 28:0|TG 8:0_8:0_12:0	DSRUPIUWBWOXGJ-UHFFFAOYSA-N	526.79	C31H58O6	CCCCCCCCCCCC(=O)OCC(COC(=O)CCCCCCC)OC(=O)CCCCCCC	45278891								Organic compounds	Lipids and lipid-like molecules	Glycerolipids	Triradylcglycerols	TG	211260	173116	147852	284728	113247	144877	167134	234641	209637	207983	94221	92570	77065	480173	118339	114984	149373	133112	171125	165169	16269913	17505024	16114761	18491144	16548846
163	1.92_342.17	342.168	1.924	[M+H]+	MSI 2	polyphenols	Naltrexone	DQCKKXVULJGBQN-XFWGSAIBSA-N	341.402	C20H23NO4	C1CC1CN2CC[C@]34[C@@H]5C(=O)CC[C@]3([C@H]2CC6=C4C(=C(C=C6)O)O5)O	5360515	HMDB0014842	C07253		DB00704		CHEBI:7465		Organic compounds	Benzenoids	Phenanthrenes and derivatives		Phenanthrenes and derivatives		3785				3791		5958	4684	1776	7531	9397			1158	16411	8451	3119	19684	61599	312824	420768	337045	412306	490722
164	9.13_172.06	172.061	9.131	[M-H]-	MSI 2	biogenic amines	(1S,3R)-1-Aminocyclopentane-1,3-dicarboxylic acid	YFYNOWXBIBKGHB-FBCQKBJTSA-N	173.167	C7H11NO4	C1C[C@](C[C@@H]1C(=O)O)(C(=O)O)N	104766								Organic compounds	Organic acids and derivatives	Carboxylic acids and derivatives	Amino acids, peptides, and analogues	Amino acids and derivatives	31162	33848	25820	28902	20895	28443	36152	28707	27649	25676	51723	48807	50823	54834	46082	54309	48399	50060	49825	58735	1611034	1417342	1858629	1689188	1907601
165	4.43_227.08	227.082	4.43	[M+H]+	MSI 2	biogenic amines	Ethyl 2-(allylamino)-4-methyl-1,3-thiazole-5-carboxylate	LOGDHFSRTYALOP-UHFFFAOYSA-N	226.297	C10H14N2O2S	CCOC(=O)C1=C(N=C(S1)NCC=C)C	1867630								Organic compounds	Organoheterocyclic compounds	Azoles	Thiazoles	Thiazolecarboxylic acids and derivatives	720929	620535	739266	750514	911916	904758	904574	803947	819490	907983	1239695	1187528	1515384	1407428	1738497	1968075	2095677	2010344	1640407	2256773	8937	9142	9714	15315	12271
166	3.44_508.44	508.436	3.442	[M+H]+	MSI 2	lipidomics	CAR 24:2	RQTPQNXGVPRWNV-UHFFFAOYSA-N												Organic compounds	Lipids and lipid-like molecules	Fatty Acyls	Fatty esters	Fatty acyl carnitines	8714	7620	9793	5650	8480	9942		9622		8751	5904	6430	8871		8390	6009	12360				368822	334736	413844	377571	365036
167	4.00_457.22	457.223	4.001	[M+H-H2O]+	MSI 1	polyphenols	6-[(3E,6E)-2,5-dihydroxy-4,6-dimethyl-7-(1,2,4-trimethyl-3,6-dioxabicyclo[3.1.0]hexan-4-yl)hepta-3,6-dien-2-yl]-4-methoxy-3,5-dimethylpyran-2-one	YAEGHQJYDLCTMR-DCIPZJNNSA-N	434.523	C24H34O7	CC1C2(C(O2)C(O1)(C)/C=C(\C)/C(/C(=C/C(C)(C3=C(C(=C(C(=O)O3)C)OC)C)O)/C)O)C	51136340								Organic compounds	Organoheterocyclic compounds	Pyrans	Pyranones and derivatives	Pyranones and derivatives			4224					5834	3541		4684	6925	4783	8488	6341	7977			8538		331773	339824	269607	358055	336012
168	10.66_863.75	863.745	10.661	[M+Na]+	MSI 2	lipidomics	TG O-52:4|TG O-18:3_16:0_18:1	FUTDSFFUYDDYOB-UHFFFAOYSA-N												Organic compounds	Lipids and lipid-like molecules	Glycerolipids	Triradylcglycerols	TG	5882	7242		26114	32460		5226	8236	6555	10498	6070					6875	8965	1182		1199	838576	1096120	876937	869226	845510
169	12.33_1035.00	1035	12.331	[M+NH4]+	MSI 2	lipidomics	TG 63:0|TG 18:0_22:0_23:0	YDUWUEXWJCQKET-UHFFFAOYSA-N												Organic compounds	Lipids and lipid-like molecules	Glycerolipids	Triradylcglycerols	TG	374764	445267	145109	255291	261129	148743	223964	226978	288470	368221	215243	217708	138769	518466	171883	294103	218574	328843	267576	270837		14579
170	6.59_290.15	290.15	6.591	[M+H]+	MSI 2	biogenic amines	Imazethapyr	XVOKUMIPKHGGTN-UHFFFAOYSA-N	289.33	C15H19N3O3	CCC1=CC(=C(N=C1)C2=NC(C(=O)N2)(C)C(C)C)C(=O)O	54740		C18865			40494	CHEBI:82022		Organic compounds	Organic acids and derivatives	Carboxylic acids and derivatives	Amino acids, peptides, and analogues	Amino acids and derivatives	1015600	1103935	930274	900271	872795	884226	1283961	918776	963100	1036344	2087172	2453882	2512304	2359247	2099730	2480853	2382697	2339427	1639309	2099600	16234	24693	34979	5782	51539
171	9.91_763.62	763.621	9.907	[M+Na]+	MSI 2	lipidomics	DG 45:5	VJYVZGJTQHZYIY-UHFFFAOYSA-N												Organic compounds	Lipids and lipid-like molecules	Glycerolipids	Diradylglycerols	DG	1024044	992778	930996	859883	857161	962787	842066	881639	1134744	1039509	1307780	1241677	1292943	1662766	1169265	1144756	1229379	1182656	1426701	1197690	66354	20312			64219
172	2.30_260.20	260.201	2.304	[M+H-2H2O]+	MSI 3	biogenic amines	Vesamicol	YSSBJODGIYRAMI-UHFFFAOYSA-N	259.387	C17H25NO	C1CCC(C(C1)N2CCC(CC2)C3=CC=CC=C3)O	5662								Organic compounds	Organoheterocyclic compounds	Piperidines	Phenylpiperidines	Phenylpiperidines	252535	258572	180875	162466	203337	199718	210293	213010	192973	169966	489574	491907	607998	580518	510885	565790	600742	463710	376077	514773			6152
173	8.66_626.61_8.65_631.56	626.6085_631.5638	8.661_8.655	[M+NH4]+_[M+Na]+	MSI 2	lipidomics	DG O-36:1|DG O-18:0_18:1	JGNCHBVZFASAST-UHFFFAOYSA-N	609.02	C39H76O4	CCCCCCCCCCCCCCCCCCOCC(CO)OC(=O)CCCCCCCC=CCCCCCCCC	53954180								Organic compounds	Lipids and lipid-like molecules	Glycerolipids	Diradylglycerols	1-alkyl,2-acylglycerols	14034	32171	12848	22405	17395	21226	4563	16407	11206	30212	13540		19465		14029	12104	9037	8018	5286	13175	1320500	1912323	1124308	1412357	1665480
174	9.52_816.71_9.52_821.66	816.7082_821.6638	9.522_9.519	[M+NH4]+_[M+Na]+	MSI 1	lipidomics	TG 48:4|TG 12:0_18:2_18:2	QYGNVKAJARKXER-UHFFFAOYSA-N												Organic compounds	Lipids and lipid-like molecules	Glycerolipids	Triradylcglycerols	TG	70901	133319	254875	80645	271963	144867	239780	121569	305704	115454	16792	22100	34159	10520	15537	20691	28251	11300	17899	23084	5524199	6943819	6827465	7399272	7300126
175	5.34_263.11	263.114	5.336	[M+H]+	MSI 2	biogenic amines	3-Deazaneplanocin A	OMKHWTRUYNAGFG-IEBDPFPHSA-N	262.265	C12H14N4O3	C1=CN=C(C2=C1N(C=N2)[C@@H]3C=C([C@H]([C@H]3O)O)CO)N	73087								Organic compounds	Organoheterocyclic compounds	Imidazopyridines	Imidazo-[4,5-c]pyridines	Imidazo-[4,5-c]pyridines			13242	6525	2258	6435	3425	4525	12157	7040			1409	8026		6600	1241		3140	4925	307187	254450	261282	259137	297467
176	8.20_630.58	630.582	8.204	[M+H-H2O]+	MSI 2	lipidomics	Cer 41:3;O3|Cer 18:2;O2/23:1;O	ZPIHKUPAGJAVQL-UHFFFAOYSA-N												Organic compounds	Lipids and lipid-like molecules	Sphingolipids	Ceramides	Long-chain ceramides	4042	4754			7546																324700	211508	251520	334620	292509
177	4.20_272.13	272.129	4.195	[M+H]+	MSI 2	polyphenols	Taxol side chain diol	OCRUDDLKDFDNGT-GJZGRUSLSA-N	271.316	C16H17NO3	C1=CC=C(C=C1)[C@@H]([C@H](CO)O)NC(=O)C2=CC=CC=C2	12986278								Organic compounds	Benzenoids	Benzene and substituted derivatives		Benzene and substituted derivatives	4145	18872	16002		23525	31730	3082	22320	7598	24033	19963	17028	16758	18885	19099	28933	28652	9957	17736	12673	719555	1085186	535240	1054969	895713
178	7.97_180.03	180.033	7.969	[M-H]-	MSI 2	biogenic amines	4-(Methoxycarbonyl)nicotinic acid	QLOYEIURVSRKOV-UHFFFAOYSA-N	181.146	C8H7NO4	COC(=O)C1=C(C=NC=C1)C(=O)O	327525								Organic compounds	Organoheterocyclic compounds	Pyridines and derivatives	Pyridinecarboxylic acids and derivatives	Pyridinecarboxylic acids	4253	4979	6026	6487	3457	5301	8082	5537	7302	6109	10228	5845	5965	11524	12908	10461	5748	8590	6754	9550	237498	243030	262594	269104	267570
179	8.62_243.02	243.018	8.625	[M-H-CO2]-	MSI 2	biogenic amines	4-Amino-3-[3-(trifluoromethyl)phenyl]-1,2-thiazole-5-carboxylic acid	KVMCEGAWQYTFKC-UHFFFAOYSA-N	288.247	C11H7F3N2O2S	C1=CC(=CC(=C1)C(F)(F)F)C2=NSC(=C2N)C(=O)O	54833		D02896						Organic compounds	Benzenoids	Benzene and substituted derivatives	Trifluoromethylbenzenes	Trifluoromethylbenzenes	122668	110644	83504	97481	76064	101134	142139	105735	114960	95372	257977	228082	236776	259831	250050	253362	270386	255099	239639	257448	6231886	5216004	6631997	6542229	7728163
180	5.36_158.15	158.154	5.364	[M+H]+	MSI 2	biogenic amines	N-Isobutyl-3-methylbutanamide	BPDCZYLPNNLOBD-UHFFFAOYSA-N	157.254	C9H19NO	CC(C)CC(=O)NCC(C)C	233652								Organic compounds	Lipids and lipid-like molecules	Fatty Acyls	Fatty amides	N-acyl amines	147934	138610	154134	124044	118938	156589	147203	123836	145993	125852	22222724	24594775	24135064	25699994	20295877	25941930	25987009	23666946	18493339	24040585	147529	115533	158202	172413	171056
181	4.86_533.42	533.418	4.861	[M+Na]+	MSI 2	lipidomics	DG 28:1	VXNZLPLSNMXOKQ-UHFFFAOYSA-N												Organic compounds	Lipids and lipid-like molecules	Glycerolipids	Diradylglycerols	DG				6361	3353	3180						5610	4185				525	3744		4020	435301	390670	338309	470752	429887
182	1.02_345.24	345.244	1.016	[M-H]-	MSI 2	biogenic amines	Ginkgolic acid I	YXHVCZZLWZYHSA-FPLPWBNLSA-N	346.504	C22H34O3	CCCCCC/C=C\CCCCCCCC1=C(C(=CC=C1)O)C(=O)O	5281858		C10794				CHEBI:5354		Organic compounds	Benzenoids	Benzene and substituted derivatives	Benzoic acids and derivatives	Hydroxybenzoic acid derivatives	586232	247971	169440	137252	760333	234188	328151	204541	200497	237995	265421	354336	369144	659307	422384	471376	211954	548874	359094	55038	2818			5997	2985
183	8.55_584.54	584.54	8.551	[M+H-H2O]+	MSI 2	lipidomics	Cer 39:4;O2|Cer 18:1;O2/21:3	ZUVQNNWZZPZQDA-UHFFFAOYSA-N												Organic compounds	Lipids and lipid-like molecules	Sphingolipids	Ceramides	Long-chain ceramides	5718	3948	7154		3699	5199	7261		6388	5264											389391	477173	400719	421929	369578
184	7.46_426.36	426.359	7.458	[M+H]+	MSI 2	polyphenols	Oleoyl-L-carnitine	IPOLTUVFXFHAHI-WHIOSMTNSA-N	425.646	C25H47NO4	CCCCCCCC/C=C\CCCCCCCC(=O)O[C@H](CC(=O)[O-])C[N+](C)(C)C	46907933						CHEBI:84651		Organic compounds	Lipids and lipid-like molecules	Fatty Acyls	Fatty acid esters	Acyl carnitines	113388	206231	229433	123828	149219	267694	110704	218297	101839	125184	55319	17923	21214	50754	71416	38291	24154	54053	63728	60824	3498274	5139642	4870030	5451934	5876997
185	7.12_656.58	656.584	7.125	[M+NH4]+	MSI 2	polyphenols	Glycerol trilaurate	VMPHSYLJUKZBJJ-UHFFFAOYSA-N	639.003	C39H74O6	CCCCCCCCCCCC(=O)OCC(COC(=O)CCCCCCCCCCC)OC(=O)CCCCCCCCCCC	10851	HMDB0011188		LMGL03012618			CHEBI:77389		Organic compounds	Lipids and lipid-like molecules	Glycerolipids	Triradylcglycerols	TG	4978																				550135	686781	1344593	538061	630811
186	1.70_269.11	269.113	1.703	[M+H]+	MSI 1	biogenic amines	Moclobemide	YHXISWVBGDMDLQ-UHFFFAOYSA-N	268.74	C13H17ClN2O2	C1COCCN1CCNC(=O)C2=CC=C(C=C2)Cl	4235	HMDB0015302	D02561		DB01171	44241	CHEBI:83531		Organic compounds	Benzenoids	Benzene and substituted derivatives	Benzoic acids and derivatives	Halobenzoic acids and derivatives	105199	70866	68474	161217	163550	162618	147013	129096	170394	69218	162303		132303	118321	101872	42685	115514	83009	142020	128649	5339976	4040303	5724179	4901727	6252876
187	7.42_114.07	114.066	7.425	[M+H-C3H6N2]+	MSI 2	biogenic amines	Simazine hydroxy	YQIXRXMOJFQVBV-UHFFFAOYSA-N	183.211	C7H13N5O	CCNC1=NC(=NC(=O)N1)NCC	17448						CHEBI:83476		Organic compounds	Organoheterocyclic compounds	Triazines	Aminotriazines	N-aliphatic s-triazines	7833	11953	13827	14728	11442	16870	15948	11376	12920	7314		11519	3008	1406	2532	17497	3599	6205	13415	6773	484189	389278	479146	463261	625364
188	1.32_343.09	343.086	1.324	[M-H]-	MSI 2	biogenic amines	Tricin methyl ether	CPCPHNWWTJLXKQ-UHFFFAOYSA-N	344.316	C18H16O7	COC1=CC(=CC(=C1OC)OC)C2=CC(=O)C3=C(C=C(C=C3O2)O)O	5379265	HMDB0037692	C19807	LMPK12110880			CHEBI:543745		Organic compounds	Phenylpropanoids and polyketides	Flavonoids	O-methylated flavonoids	4'-O-methylated flavonoids	14972	12241	7023	17058	8456	11372	19485	14152	18637	22315	65998	73076	56949	73769	59444	40774	38892	52918	31855	45790	813625	587701	899658	781390	994034
189	6.67_439.38	439.379	6.675	[M+H-C2H8NO4P]+	MSI 2	polyphenols	1,2-Dilauroyl-sn-glycero-3-phosphoethanolamine	ZLGYVWRJIZPQMM-HHHXNRCGSA-N	579.748	C29H58NO8P	CCCCCCCCCCCC(=O)OC[C@H](COP(=O)(O)OCCN)OC(=O)CCCCCCCCCCC	90657571			LMGP02010098				CPD-17088	Organic compounds	Lipids and lipid-like molecules	Glycerophospholipids	Glycerophosphoethanolamines	Phosphatidylethanolamines	7360	3407	15855	13169	1586	16689	11136	16994					10615	2119		14968		8931		6245	941054	1356691	2743498	1272955	1244354
190	5.26_392.24	392.243	5.263	[M+H-C8H9NO]+	MSI 2	biogenic amines	1H-Indole-4-carboxamide, N-[(1,2-dihydro-4,6-dimethyl-2-oxo-3-pyridinyl)methyl]-3-methyl-1-[(1S)-1-methylpropyl]-6-[6-(1-piperazinyl)-3-pyridinyl]-	FKSFKBQGSFSOSM-QFIPXVFZSA-N	526.674	C31H38N6O2	CC[C@H](C)N1C=C(C2=C(C=C(C=C21)C3=CN=C(C=C3)N4CCNCC4)C(=O)NCC5=C(C=C(NC5=O)C)C)C	68210102								Organic compounds	Organoheterocyclic compounds	Diazinanes	Piperazines	Pyridinylpiperazines	1185347	1056305	889251	958262	858044	1114525	1185451	939737	1208216	859736	2264149	1984650	2513223	2039937	2452149	2551438	2458513	2061382	2007168	2792693	44063	10356	29345	14069	28689
191	8.22_737.61	737.606	8.221	[M+Na]+	MSI 2	lipidomics	DG 43:4	BGGHTRGQBWBDHB-UHFFFAOYSA-N												Organic compounds	Lipids and lipid-like molecules	Glycerolipids	Diradylglycerols	DG	102102	140552	128415	104275	143537	111581	122387	122165	79141	142625	155130	168543	142987	168390	171736	164106	128846	182290	178620	226043
192	9.55_241.13	241.13	9.55	[M+H]+	MSI 1	biogenic amines	Anserine	MYYIAHXIVFADCU-QMMMGPOBSA-N	240.259	C10H16N4O3	CN1C=NC=C1C[C@@H](C(=O)O)NC(=O)CCN	112072	HMDB0000194	C01262				CHEBI:18323	CPD-401	Organic compounds	Organic acids and derivatives	Peptidomimetics	Hybrid peptides	Hybrid peptides	34233	27018	11285	14110	13728	26232	23516	18936	10460	9062	18166		24918	22680	19806	30899	35097	30720	13914	22692	867094	706916	882797	882065	1084985
193	1.00_199.17	199.169	1.005	[M-H]-	MSI 1	lipidomics	FA 12:0 (lauric acid)	POULHZVOKOAJMA-UHFFFAOYSA-N	200.318	C12H24O2	CCCCCCCCCCCC(=O)O	3893	HMDB0000638	C02679	LMFA01010012	DB03017	21590	CHEBI:30805		Organic compounds	Lipids and lipid-like molecules	Fatty Acyls	Fatty acids and conjugates	Medium-chain fatty acids	4156649	5235431	5566718	5418017	4419151	6363407	6550500	6265902	4249418	4618339	11841933	14025269	13779705	14232802	12003848	11680265	14197973	11832410	11411782	13417723	115037774	226854288	250277397	219920026	240924292
194	5.48_586.52	586.519	5.478	[M+H-H2O]+	MSI 2	lipidomics	Cer 38:4;O3|Cer 18:1;O2/20:3;O	XROKYWJFKITZTJ-UHFFFAOYSA-N												Organic compounds	Lipids and lipid-like molecules	Sphingolipids	Ceramides	Long-chain ceramides	3899277	5643631	4752849	3061781	6336176	5646814	4523605	4728789	4533169	5028271	7216709	7243444	8487410	7853985	7105330	5947713	7566157	5329329	6468156	7435551	104505	21608	100037	80745	74008
195	7.18_360.20	360.197	7.183	[M+H]+	MSI 1	polyphenols	Lobeline	MXYUKLILVYORSK-HBMCJLEFSA-N	337.456	C22H27NO2	CN1[C@@H](CCC[C@@H]1CC(=O)C2=CC=CC=C2)C[C@@H](C3=CC=CC=C3)O	101616		C07475		DB05137	23219	CHEBI:48723		Organic compounds	Organic oxygen compounds	Organooxygen compounds	Carbonyl compounds	Ketones	112729	140553	152780	79484	148036	217494	120574	237710	113230	168966	275853	303218	179387	226687	318251	258650	257811	267207	228841	231121
196	5.37_371.25	371.254	5.372	[M+Na]+	MSI 2	biogenic amines	Larixyl acetate	WCNCDVQMEQJFGH-TZWCSUAMSA-N	348.52	C22H36O3	CC(=O)O[C@H]1CC(=C)[C@@H]([C@@]2([C@@H]1C(CCC2)(C)C)C)CC[C@@](C)(C=C)O	11957828								Organic compounds	Lipids and lipid-like molecules	Prenol lipids	Diterpenoids	Diterpenoids	227394	261675	172467	163918	168741	212865	304726	199523	170145	207762	532187	558992	529190	565968	489441	451606	546963	487479	409420	470119	4278		7734
197	1.06_240.16	240.16	1.057	[M+H]+	MSI 2	polyphenols	Albuterol	NDAUXUAQIAJITI-UHFFFAOYSA-N	239.311	C13H21NO3	CC(C)(C)NCC(C1=CC(=C(C=C1)O)CO)O	2083		D02147		DB01001	21255			Organic compounds	Benzenoids	Benzene and substituted derivatives	Benzyl alcohols	Benzyl alcohols		5170															6256				168377	251238	181742	261952	253791
198	8.22_732.65	732.651	8.221	[M+NH4]+	MSI 2	lipidomics	SE 24:1;O4/22:0	ALZKITUVCAINJY-UHFFFAOYSA-N												Organic compounds	Lipids and lipid-like molecules	Sterol lipids	Steroid esters	SE	667746	808495	776595	690857	831712	739838	796561	716260	682908	844340	1069650	993908	980022	1201018	1198913	1013603	913905	1078992	1229512	1394798	11693		12597	8742	14273
199	9.67_259.02	259.022	9.672	[M-H]-	MSI 1	biogenic amines	Glucose 1-phosphate	HXXFSFRBOHSIMQ-VFUOTHLCSA-N	260.136	C6H13O9P	C([C@@H]1[C@H]([C@@H]([C@H]([C@H](O1)OP(=O)(O)O)O)O)O)O	65533		C00103		DB02843		CHEBI:29042		Organic compounds	Organic oxygen compounds	Organooxygen compounds	Carbohydrates and carbohydrate conjugates	Monosaccharides	345534	423864	242936	342318	160721	376581	648152	412138	447947	398957	32540	73581	48004	45812	54297	58475	36222	42422	5866	31564	1638	5875	1705	17449	4456
200	9.87_766.69_9.87_771.65	766.6922_771.647	9.869_9.871	[M+NH4]+_[M+Na]+	MSI 1	lipidomics	TG 44:1|TG 12:0_14:0_18:1	MVBJOSAJFXMGHL-UHFFFAOYSA-N												Organic compounds	Lipids and lipid-like molecules	Glycerolipids	Triradylcglycerols	TG	127543	145170	201752	137339	109176	131442	172305	125439	189547	160627	137026	143804	119920	324402	124267	114683	91469	97914	90252	123240	9210349	9397073	9879841	10306238	11101329
201	5.87_148.06	148.062	5.869	[M+H]+	MSI 2	biogenic amines	.beta.-Glutamic acid	BBJIPMIXTXKYLZ-UHFFFAOYSA-N	147.129	C5H9NO4	C(C(CC(=O)O)N)C(=O)O	73064		C05574				CHEBI:28791		Organic compounds	Lipids and lipid-like molecules	Fatty Acyls	Fatty acids and conjugates	Amino fatty acids	25826	32260	44347	44050	10258	24506	12422	12211	3967		8035	20392	10455		7803	17465	9266	11612	31609	41171	552947	423336	549915	475119	650185
202	7.96_758.63_7.95_763.59	758.6295_763.5855	7.955_7.953	[M+NH4]+_[M+H]+	MSI 2	lipidomics	TG 44:5|TG 8:0_18:2_18:3	CHUOIIPZWBUOMF-UHFFFAOYSA-N												Organic compounds	Lipids and lipid-like molecules	Glycerolipids	Triradylcglycerols	TG					5373			5796													163875	308667	366995	220109	245980
203	0.84_389.20	389.204	0.836	[M+H]+	MSI 2	polyphenols	3-[3-(2-Piperidinoethoxy)phenyl]-5-(1H-1,2,4-triazol-5-yl)-1H-indazole	XDJCLCLBSGGNKS-UHFFFAOYSA-N	388.466	C22H24N6O	C1CCN(CC1)CCOC2=CC=CC(=C2)C3=NNC4=C3C=C(C=C4)C5=NC=NN5	10430360								Organic compounds	Organoheterocyclic compounds	Azoles	Pyrazoles	Phenylpyrazoles	3289687	3363256	4252408	2606789	3663824	5764206	1571315	4618909	2978751	3343798	6422048	7766242	5080223	5369459	6483484	5584500	6684989	6513266	5984779	4725816	57499	69854	32300	85467	71512
204	1.02_343.23	343.228	1.021	[M-H-H2O]-	MSI 2	biogenic amines	16,16-Dimethylprostaglandin A2	MOTPSJUHMGPRFZ-PMOPTMIRSA-N	362.504	C22H34O4	CCCCC(C)(C)C(/C=C/[C@H]1C=CC(=O)C1C/C=C\CCCC(=O)O)O	71684361								Organic compounds	Lipids and lipid-like molecules	Fatty Acyls	Eicosanoids	Prostaglandins and related compounds	295910	140231	97300	81465	389334	115208	166669	110078	114030	130915	130164	169429	170336	327865	214837	213671	106757	294463	149661	18653	2012	3466
205	1.37_285.10	285.099	1.366	[M+H-H2O]+	MSI 2	polyphenols	5-(Diphenylphosphinyl)pentanoic acid	KIGXMYYGQYMICF-UHFFFAOYSA-N	302.305	C17H19O3P	C1=CC=C(C=C1)P(=O)(CCCCC(=O)O)C2=CC=CC=C2	10380172								Organic compounds	Benzenoids	Benzene and substituted derivatives	Phenylphosphines and derivatives	Phenylphosphines and derivatives	19752	22017	27993	28251	20952	39269	14459	59901	12824	39524	50357	40047	10779	30013	94719	10145	60766	44712	59195	62241	1028886	1315527	865468	1491063	1343523
206	7.29_180.10	180.102	7.289	[M+H]+	MSI 2	biogenic amines	N-Acetyltyramine	ATDWJOOPFDQZNK-UHFFFAOYSA-N	179.216	C10H13NO2	CC(=O)NCCC1=CC=C(C=C1)O	121051								Organic compounds	Benzenoids	Phenols	1-hydroxy-2-unsubstituted benzenoids	1-hydroxy-2-unsubstituted benzenoids	114199	164776	119044	85128	121502	128264	171122	129314	147508	140944	233635	270603	195451	214931	201704	269884	285107	242268	184087	189984	7222913	5112080	6807412	5478719	7008014
207	10.43_861.73_10.45_856.78	861.7299_856.7754	10.431_10.446	[M+Na]+_[M+H]+	MSI 2	lipidomics	TG O-52:5|TG O-18:4_16:0_18:1	GQQQQGCTHCOIMA-UHFFFAOYSA-N												Organic compounds	Lipids and lipid-like molecules	Glycerolipids	Triradylcglycerols	TG	32010	3850	42093	2496	58993	6778	9189	17935	47905	29563	2099	7165	12784		13323	41091	41472	8942	9059	8057	1381835	1093319	1244622	1475516	1195550
208	2.75_285.10	285.098	2.749	[M+H-C3H7O]+	MSI 2	biogenic amines	Naloxone N-oxide	GAUIBVINJLVYRY-QBFPIVRFSA-N	343.379	C19H21NO5	C=CC[N+]1(CC[C@]23[C@@H]4C(=O)CC[C@]2([C@H]1CC5=C3C(=C(C=C5)O)O4)O)[O-]	14099368								Organic compounds	Benzenoids	Phenanthrenes and derivatives		Phenanthrenes and derivatives	16646	11706	8273	2907	7947	4369	8822	5033	12114	9555	46977	57044	43302	47585	47860	45934	60170	51312	28347	32843	902350	691913	823785	818458	825589
209	3.74_703.53	703.529	3.738	[M+Na]+	MSI 2	lipidomics	DG 41:7	CXBKHZFOZCZUNC-UHFFFAOYSA-N												Organic compounds	Lipids and lipid-like molecules	Glycerolipids	Diradylglycerols	DG	216089	232810	220001	223235	293822	254696	221849	214404	285324	250591	241320	243822	211869	262462	205330	192910	244166	165053	207765	241204
210	6.15_330.23	330.228	6.149	[M+H]+	MSI 2	biogenic amines	Methanone, [1-(5-fluoropentyl)-1H-indol-3-yl](2,2,3,3-tetramethylcyclopropyl)-	PXLDPUUMIHVLEC-UHFFFAOYSA-N	329.452	C21H28FNO	CC1(C(C1(C)C)C(=O)C2=CN(C3=CC=CC=C32)CCCCCF)C	57501498								Organic compounds	Organoheterocyclic compounds	Indoles and derivatives	N-alkylindoles	N-alkylindoles	364739	463108	260914	319609	284543	368391	547182	365815	344328	376125	837068	870590	848727	896033	828816	833624	952953	769323	666454	765444			18469	11883	28193
211	7.49_668.59	668.595	7.491	[M+H-H2O]+	MSI 2	lipidomics	Cer 44:5;O3|Cer 18:2;O2/26:3;O	GHOWAQVOWLJJTK-UHFFFAOYSA-N												Organic compounds	Lipids and lipid-like molecules	Sphingolipids	Ceramides	Long-chain ceramides	5835	6770	6207	15832	14309	6438	9789		9767	4532	15903	15426	12299	16235	24711	22087	13235	21510	14553	8858	331505	549166	363780	296977	282032
212	11.50_909.83	909.826	11.496	[M+Na]+	MSI 2	lipidomics	TG O-55:2|TG O-19:1_18:0_18:1	RYJQWWXLRFLIPU-UHFFFAOYSA-N												Organic compounds	Lipids and lipid-like molecules	Glycerolipids	Triradylcglycerols	TG	136516	199514	128028	149233	225984	153556	139272	169856	138665	153536	236009	252158	296786	177450	247655	258396	271155	233649	236591	299737
213	4.02_531.40	531.402	4.024	[M+Na]+	MSI 2	lipidomics	DG 28:2	ROHANZJEYWIHHE-UHFFFAOYSA-N												Organic compounds	Lipids and lipid-like molecules	Glycerolipids	Diradylglycerols	DG	4741										4947		4817								390449	277350	326732	434425	367485
214	8.35_634.62	634.615	8.353	[M-H]-	MSI 2	lipidomics	Cer 41:1;O2|Cer 18:1;O2/23:0	NAJHAHQNQCNWOP-UHFFFAOYSA-N	636.088	C41H81NO3	CCCCCCCCCCCCCCCCCCCCCCC(=O)NC(CO)C(C=CCCCCCCCCCCCCC)O	5321273								Organic compounds	Lipids and lipid-like molecules	Sphingolipids	Ceramides	Ceramides	4244	2850	4241	8581	3981	6789	6205		5752		3897	12733	15933	11743	15164		3878	5860	5486	9604	169471	149427	155017	171147	192714
215	3.50_301.07	301.072	3.5	[M+H]+	MSI 3	polyphenols	carviolin	XNMZBRJAWRIJII-UHFFFAOYSA-N	300.263	C16H12O6	COC1=CC(=CC2=C1C(=O)C3=C(C2=O)C=C(C=C3O)O)CO	10040432								Organic compounds	Benzenoids	Anthracenes	Anthraquinones	Hydroxyanthraquinones	131163	135821	154160	94420	120364	166631	78467	175887	83271	107972	208324	224682	153613	187484	232176	223787	205030	210771	183713	148607	2318	3240
216	7.34_280.15	280.155	7.345	[M+Na]+	MSI 2	biogenic amines	cis-2-tert-Butoxycarbonylamino-2-methylcyclohexanecarboxylic acid	LSHSJLZEFNANGN-NOZJJQNGSA-N	257.327	C13H23NO4	C[C@]1(CCCC[C@@H]1C(=O)O)NC(=O)OC(C)(C)C	17039385								Organic compounds	Organic acids and derivatives	Carboxylic acids and derivatives	Carboxylic acids	Carboxylic acids	280795	330551	238662	233836	224436	240114	352353	255418	284486	264872	536799	686829	607472	624256	499267	694932	668566	740008	507304	524381		11022	7010		12203
217	5.33_260.14	260.14	5.331	[M+H]+	MSI 2	biogenic amines	N-(1,5-Dimethyl-3-oxo-2-phenyl-2,3-dihydro-1H-pyrazol-4-yl)propanamide	MTAMBPMMQPPYRK-UHFFFAOYSA-N	259.304	C14H17N3O2	CCC(=O)NC1=C(N(N(C1=O)C2=CC=CC=C2)C)C	203248								Organic compounds	Organoheterocyclic compounds	Azoles	Pyrazoles	Phenylpyrazoles	762621	909254	705953	659412	744851	802688	857115	691075	722399	689472	1571465	1511705	1477094	1756107	1511252	1457826	1545981	1447177	1407622	1676914	24876	21615	16389	20309	26961
218	5.23_580.53	580.531	5.23	[M+H-H2O]+	MSI 2	lipidomics	Cer 36:1;O4	JAHRJVSDVRBZDV-UHFFFAOYSA-N												Organic compounds	Lipids and lipid-like molecules	Sphingolipids	Ceramides	Long-chain ceramides	2505	9016	1591	3909	7585	1359	2658	12714	9468	5978	23541	27376	10334	10507	21073	19362	28235	22456	56595	35788	515375	600000	603357	726287	590840
219	3.25_310.17	310.166	3.247	[Cat]+	MSI 2	polyphenols	Sinapine cation	HUJXHFRXWWGYQH-UHFFFAOYSA-O	310.366	C16H24NO5	C[N+](C)(C)CCOC(=O)C=CC1=CC(=C(C(=C1)OC)O)OC	5280385	HMDB0029379	C00933				CHEBI:16353	O-SINAPOYLCHOLINE	Organic compounds	Phenylpropanoids and polyketides	Cinnamic acids and derivatives	Hydroxycinnamic acids and derivatives	Coumaric acids and derivatives		2838		3519	3897					4021		9374	4429		5012		3440	8788	3490	3008	106496	154962	116022	157398	148176
220	9.70_881.76_9.72_876.80	881.7584_876.8018	9.704_9.717	[M+Na]+_[M+H-H2O]+	MSI 1	lipidomics	TG 52:2|TG 16:0_16:0_20:2	FKGAPPOSQYSVQE-UHFFFAOYSA-N												Organic compounds	Lipids and lipid-like molecules	Glycerolipids	Triradylcglycerols	TG	21560	54223	33993	42071	48494	60401	26227	35392	54784	36837	7494		18928	14031	7571	6287	5200	19593	10471	9929	1733467	1195670	1969682	2086900	1914538
221	5.83_255.23	255.232	5.826	[M+H]+	MSI 2	polyphenols	Palmitelaidic acid	SECPZKHBENQXJG-BQYQJAHWSA-N	254.409	C16H30O2	CCCCCC/C=C/CCCCCCCC(=O)O	5282745	HMDB0012328		LMFA01030057	DB04257	21603	CHEBI:59265		Organic compounds	Lipids and lipid-like molecules	Fatty Acyls	Fatty acids and conjugates	Long-chain fatty acids	647145	855884	1059158	625258	873514	1425731	623482	1385572	651777	2940812	1336121	1561889	890139	1242489	1443782	1235570	1204644	1363887	1246387	1089153	34100933	43559032	33352660	50552401	41547883
222	8.04_214.08	214.083	8.045	[M-H]-	MSI 2	biogenic amines	6-(Dimethylamino)naphthalene-2-carboxylic acid	OAPBBTYSMWBVPM-UHFFFAOYSA-N	215.248	C13H13NO2	CN(C)C1=CC2=C(C=C1)C=C(C=C2)C(=O)O	15333973						CHEBI:51912		Organic compounds	Benzenoids	Naphthalenes	Naphthalenecarboxylic acids and derivatives	Naphthalenecarboxylic acids	23981	22064	19209	25187	19672	23852	26675	20373	25678	22414	38180	35436	41222	47071	48362	43741	42332	50121	40069	47374	692213	631450	793069	670594	828310
223	8.14_400.34	400.344	8.143	[M+H]+	MSI 2	polyphenols	Palmitoylcarnitine	XOMRRQXKHMYMOC-UHFFFAOYSA-N	399.609	C23H45NO4	CCCCCCCCCCCCCCCC(=O)OC(CC(=O)[O-])C[N+](C)(C)C	461						CHEBI:73067		Organic compounds	Lipids and lipid-like molecules	Fatty Acyls	Fatty acid esters	Acyl carnitines								4862			6191		4123		5335	3387		5567			158083	195516	163077	196835	200932
224	4.12_705.54_4.12_721.52	705.5426_721.5156	4.116_4.115	[M+Na]+_[M+K]+	MSI 2	lipidomics	DG 41:6	ZXJVUEJYXDAZTF-UHFFFAOYSA-N												Organic compounds	Lipids and lipid-like molecules	Glycerolipids	Diradylglycerols	DG	184202	280005	149850	145133	156467	204466	164372	183583	179689	156816	491209	444960	507838	189688	415313	511171	572703	520125	518744	522000
225	3.17_350.30_3.17_328.32	350.3030_328.3210	3.170_3.169	[M+H]+	MSI 2	lipidomics	Mead acid-EA	YKGQBEGMUSSPFY-YOILPLPUSA-N	349.551	C22H39NO2	CCCCCCCC/C=C\C/C=C\C/C=C\CCCC(=O)NCCO	16061185			LMFA08040037					Organic compounds	Organic nitrogen compounds	Organonitrogen compounds	Amines	Alkanolamines	261059	488041	345378	366990	490916	482380	436439	425397	306333	377574	820144	832207	1043509	883230	919890	823901	742498	615463	975298	1176959	14128775	11761464	13497174	13264029	11645019
226	8.04_238.08	238.08	8.039	[M+H]+	MSI 2	biogenic amines	1-Phenyl-1H-indole-2-carboxylic acid	WMHIWHPGXRRKJM-UHFFFAOYSA-N	237.254	C15H11NO2	C1=CC=C(C=C1)N2C3=CC=CC=C3C=C2C(=O)O	646116								Organic compounds	Organoheterocyclic compounds	Indoles and derivatives	Indolecarboxylic acids and derivatives	Indolecarboxylic acids and derivatives	5028	2276		3689	1467		3901	6608	4828		5301		8683	10914		5169		7668			182103	169674	159404	153396	205728
227	2.63_428.37	428.374	2.626	[M+H]+	MSI 2	lipidomics	CAR 18:0	FNPHNLNTJNMAEE-HSZRJFAPSA-N	427.662	C25H49NO4	CCCCCCCCCCCCCCCCCC(=O)O[C@H](CC(=O)[O-])C[N+](C)(C)C	52922056			LMFA07070008			CHEBI:84644		Organic compounds	Lipids and lipid-like molecules	Fatty Acyls	Fatty acid esters	Acyl carnitines	241312	248693	249154	244093	254747	253574	251726	286843	283714	218237	239838	315655	339286	560412	275843	288837	304935	240800	321250	291898	8330180	9492336	7273125	7775199	8099221
228	6.11_203.14	203.139	6.107	[M+H]+	MSI 2	biogenic amines	Leu-Ala	HSQGMTRYSIHDAC-BQBZGAKWSA-N	202.251	C9H18N2O3	C[C@@H](C(=O)O)NC(=O)[C@H](CC(C)C)N	6992295						CHEBI:73527		Organic compounds	Organic acids and derivatives	Carboxylic acids and derivatives	Amino acids, peptides, and analogues	Peptides	1760931	2017555	1426444	1393765	1262738	1486886	2392476	1658951	1596760	1718702	3826231	4079212	4173838	4394503	3597685	4155770	3832253	3594201	3457873	3757503	61687	36050	42844	46951	85312
229	2.13_147.04	147.044	2.134	[M+H-2H2O]+	MSI 1	polyphenols	Coumarin	ZYGHJZDHTFUPRJ-UHFFFAOYSA-N	146.143	C9H6O2	C1=CC=C2C(=C1)C=CC(=O)O2	323	HMDB0001218	C05851		DB04665	20348	CHEBI:28794	COUMARIN	Organic compounds	Phenylpropanoids and polyketides	Coumarins and derivatives		Coumarins and derivatives			14490							3516			3649	10708				4148		1767	93601	123181	68844	133247	112521
230	9.80_261.04	261.037	9.798	[M+H]+	MSI 3	biogenic amines	Glucose 6-phosphate	NBSCHQHZLSJFNQ-GASJEMHNSA-N	260.136	C6H13O9P	C([C@@H]1[C@H]([C@@H]([C@H](C(O1)O)O)O)O)OP(=O)(O)O	5958	HMDB0001401	C00092						Organic compounds	Organic oxygen compounds	Organooxygen compounds	Carbohydrates and carbohydrate conjugates	Monosaccharides	87625	132274	96938	108315	64224	96427	190813	142788	132121	125444													3450
231	5.97_579.54	579.536	5.967	[M-H]-	MSI 2	lipidomics	AAHFA 37:0;O|AAHFA 15:0/22:0;O	WMBSFYLVTBPXND-UHFFFAOYSA-N	580.543	C37H72O4	CCCCCCCCCCCCCCCCCCCCC(C(=O)O)OC(=O)CCCCCCCCCCCCCC	133048671								Organic compounds	Lipids and lipid-like molecules	Fatty Acyls	Fatty acids and conjugates	Very long-chain fatty acids	520228	601215	47360	84603	125196	90061	70635	102752	57073	143000	1218941	1304617	1401650	1138203	242728	250051	265672	199777	318352	287866	5258				3627
232	5.83_237.22_5.82_219.21	237.2218_219.2112	5.826_5.817	[M+H-2H2O]+_[M+H-3H2O]+	MSI 2	polyphenols	Juniperic acid	UGAGPNKCDRTDHP-UHFFFAOYSA-N	272.424	C16H32O3	C(CCCCCCCC(=O)O)CCCCCCCO	10466		C18218	LMFA01050051			CHEBI:55328		Organic compounds	Lipids and lipid-like molecules	Fatty Acyls	Fatty acids and conjugates	Long-chain fatty acids	506762	647388	796332	444693	662787	1010471	488435	942539	460627	1959473	939906	989623	621983	880625	1073982	951264	915258	956849	915777	752714	22341423	29451709	23117465	34691183	27534170
233	7.51_592.57_7.51_614.55	592.5665_614.5471	7.514_7.514	[M+H-H2O]+_[M+H]+	MSI 2	lipidomics	Cer 38:1;O3|Cer 21:0;O2/17:1;O	KKZPIAGBNZWSPS-UHFFFAOYSA-N												Organic compounds	Lipids and lipid-like molecules	Sphingolipids	Ceramides	Long-chain ceramides	22874	51423	29559	46404	73655	38737	31064	18102	31628	37303	20111	12852	14028	9855	21316	15089	46571	18441	24782	28479	1681740	1628935	1966398	1751946	1524037
234	2.36_657.37	657.368	2.362	[M+Na]+	MSI 2	polyphenols	(3S,4S,6aR,6bS,8R,8aR,12aS,14bR)-8-Hydroxy-4,6a,6b,11,11,14b-hexamethyl-3-[(2S,3R,4S,5R)-3,4,5-trihydroxyoxan-2-yl]oxy-1,2,3,4a,5,6,7,8,9,10,12,12a,14,14a-tetradecahydropicene-4,8a-dicarboxylic acid	CFAJIMXUZRPYDP-GHCUZIKHSA-N	634.799	C35H54O10	C[C@]12CC[C@@H]([C@@](C1CC[C@@]3(C2CC=C4[C@]3(C[C@H]([C@@]5([C@H]4CC(CC5)(C)C)C(=O)O)O)C)C)(C)C(=O)O)O[C@H]6[C@@H]([C@H]([C@@H](CO6)O)O)O	56776384								Organic compounds	Lipids and lipid-like molecules	Prenol lipids	Triterpenoids	Triterpenoids	3927103	3833306	5526874	2805411	4955683	7279260	2138970	6277860	3342183	4203756	8865863	10844255	5631650	6214024	9646960	8043150	8526010	9322096	8173438	7366254	140411	179039	97052	200259	132885
235	5.88_561.45_5.88_556.49	561.449_556.4936	5.881_5.884	[M+Na]+_[M+NH4]+	MSI 2	lipidomics	DG 30:1|DG 12:0_18:1	JTRCZCRPVKKEJS-UHFFFAOYSA-N												Organic compounds	Lipids and lipid-like molecules	Glycerolipids	Diradylglycerols	DG	102085	111285	173068	80213	132706	123772	82197	109969	123786	78894	75643	60428	71143	66958	63445	67617	61020	56967	75120	55724	4506758	3699779	4948041	6390700	4801945
236	9.53_795.65	795.649	9.534	[M+H-H2O]+	MSI 3	lipidomics	TG 46:3	KJTNBMXTRCBORQ-UHFFFAOYSA-N												Organic compounds	Lipids and lipid-like molecules	Glycerolipids	Triradylcglycerols	TG				6644	7594	4845	9812	8662	11630					10246							249001	353514	293320	327620	278006
237	7.00_189.12	189.123	7.005	[M+H]+	MSI 2	biogenic amines	Val-Ala	HSRXSKHRSXRCFC-WDSKDSINSA-N	188.225	C8H16N2O3	C[C@@H](C(=O)[O-])NC(=O)[C@H](C(C)C)[NH3+]	6992637						CHEBI:75008		Organic compounds	Organic acids and derivatives	Carboxylic acids and derivatives	Amino acids, peptides, and analogues	Peptides	360641	357740	308140	308660	266501	306066	470119	306973	342360	282881	394210	492979	418389	473867	420884	476203	506253	423489	401390	469292		9609	26000
238	5.98_355.15	355.154	5.981	[M+H]+	MSI 3	polyphenols	5,7-dihydroxy-2-(4-methoxyphenyl)-6-(3-methylbut-2-enyl)-2,3-dihydrochromen-4-one	ZTDRTMVBTLHQII-SFHVURJKSA-N	354.397	C21H22O5	CC(=CCC1=C(C2=C(C=C1O)O[C@@H](CC2=O)C3=CC=C(C=C3)OC)O)C	35756082								Organic compounds	Phenylpropanoids and polyketides	Flavonoids	Flavans	6-prenylated flavans		8473																22728			246286	360176	315681	335970	504953
239	9.96_818.72_9.96_823.68	818.7236_823.679	9.959_9.96	[M+NH4]+_[M+Na]+	MSI 1	lipidomics	TG 48:3|TG 12:0_18:1_18:2	PURPKTYKZMLEGI-UHFFFAOYSA-N												Organic compounds	Lipids and lipid-like molecules	Glycerolipids	Triradylcglycerols	TG	401015	360620	598110	304262	506952	367587	401171	327996	607858	366978	70195	36587	89628	111147	54000	40165	110564	60664	77723	99037	12619123	16507856	20751002	14651113	15913804
240	5.84_447.21	447.215	5.842	[M+K]+	MSI 3	polyphenols	Licoricidin	GBRZTUJCDFSIHM-KRWDZBQOSA-N	424.53	C26H32O5	CC(=CCC1=C(C=CC(=C1O)[C@H]2CC3=C(C=C(C(=C3OC)CC=C(C)C)O)OC2)O)C	480865		C16986				CHEBI:69082		Organic compounds	Phenylpropanoids and polyketides	Isoflavonoids	O-methylated isoflavonoids	5-O-methylated isoflavonoids				9235				20697												8853	284283	272836	290253	296973	421648
241	8.97_243.15	243.145	8.975	[M+H]+	MSI 2	biogenic amines	N-[2-(Dimethylamino)ethyl]-1-naphthamide	BEUQPNDUGUHRKU-UHFFFAOYSA-N	242.317	C15H18N2O	CN(C)CCNC(=O)C1=CC=CC2=CC=CC=C21	39642								Organic compounds	Benzenoids	Naphthalenes	Naphthalenecarboxylic acids and derivatives	Naphthalenecarboxamides	11642	15301	9892	9428	5708	9301	27272	10920	12716	16033	16133	22195	27253	26407	46018	34768	28480	26774	13981	17322	484170	356265	503917	416656	493585
242	2.76_163.04	163.039	2.76	[M+H-C4H9NO2]+	MSI 2	polyphenols	3,4-Dihydroxycinnamic acid (L-alanine methyl ester) amide	WFBBISJLIGYSGF-HORMHSFOSA-N	265.262	C13H15NO5	C[C@@H](C(=O)OC)NC(=O)/C=C\C1=CC(=C(C=C1)O)O	35026716								Organic compounds	Organic acids and derivatives	Carboxylic acids and derivatives	Amino acids, peptides, and analogues	Amino acids and derivatives	1119025	1402379	1920124	726322	1654348	2648266	773288	2436836	1121130	1746733	1088647	1302614	819347	970317	1319858	1098467	1099133	1153118	1081850	843233	45897	101170	35411	71610	62154
243	11.79_888.84	888.838	11.787	[M+NH4]+	MSI 2	lipidomics	TG O-54:3|TG O-18:0_18:1_18:2	SNSCEPRATRYHSL-UHFFFAOYSA-N												Organic compounds	Lipids and lipid-like molecules	Glycerolipids	Triradylcglycerols	TG									6379												489400	495671	426838	482495	579860
244	9.11_814.69_9.11_819.65	814.6926_819.6471	9.109_9.107	[M+NH4]+_[M+Na]+	MSI 1	lipidomics	TG 48:5|TG 12:0_18:2_18:3	KFQRBSAAUZGDDD-UHFFFAOYSA-N												Organic compounds	Lipids and lipid-like molecules	Glycerolipids	Triradylcglycerols	TG	25943	34419	66707	24311	67834	29659	76967	58129	25181	47278					4020						1192393	1158719	1319919	1271891	1174842
245	2.92_160.13	160.133	2.916	[Cat]+	MSI 2	biogenic amines	Methacholine cation	NZWOPGCLSHLLPA-UHFFFAOYSA-N	160.234	C8H18NO2	CC(C[N+](C)(C)C)OC(=O)C	1993	HMDB0015654	C07471		DB06709		CHEBI:6804		Organic compounds	Organic nitrogen compounds	Organonitrogen compounds	Quaternary ammonium salts	Tetraalkylammonium salts	25198	31374	22382	21701	18554	29864	47804	28604	27104	23082	67815	70873	64405	61998	54397	66656	41003	66364	59802	69464	1260712	911553	1213232	1146841	1338278
246	2.87_205.12	205.123	2.868	[M+H-H2O]+	MSI 2	polyphenols	2-Hydroxyibuprofen	UJHKVYPPCJBOSG-UHFFFAOYSA-N	222.281	C13H18O3	CC(C1=CC=C(C=C1)CC(C)(C)O)C(=O)O	10443535	HMDB0060920							Organic compounds	Phenylpropanoids and polyketides	Phenylpropanoic acids		Phenylpropanoic acids	3367	3762			5488	11511		8890		4249	9061	11132		3923	13686	11220	9720	4666	4019	19912	196468	257874	153576	272147	234273
247	3.83_510.45	510.452	3.826	[M+H]+	MSI 2	lipidomics	CAR 24:1	KRKDKJNWLQGJLG-UHFFFAOYSA-N												Organic compounds	Lipids and lipid-like molecules	Fatty Acyls	Fatty esters	Fatty acyl carnitines	5023	5347		10581	15353	6042	4350	4981	4368	4278	27368	26405	33713		43362	40431	38097	29655	35664	45704	480217	512646	514124	406656	452658
248	7.14_286.18	286.181	7.142	[M+H-CH2O2]+	MSI 2	polyphenols	Tetramethrin	CXBMCYHAMVGWJQ-UHFFFAOYSA-N	331.407	C19H25NO4	CC(=CC1C(C1(C)C)C(=O)OCN2C(=O)C3=C(C2=O)CCCC3)C	83975		C18373						Organic compounds	Organoheterocyclic compounds	Isoindoles and derivatives	Isoindolines	Isoindolones	199430	235707	257707	104735	176106	311291	154577	289189	120172	204948	302648	378847	190686	292676	366346	308061	308467	313737	294020	267719	4598		15420	4530	13311
249	5.10_144.08	144.081	5.103	[M+H-CH5N]+	MSI 2	biogenic amines	N-Methyltryptamine	NCIKQJBVUNUXLW-UHFFFAOYSA-N	174.243	C11H14N2	CNCCC1=CNC2=CC=CC=C21	6088	HMDB0004370	C06213				CHEBI:28136		Organic compounds	Organoheterocyclic compounds	Indoles and derivatives	Tryptamines and derivatives	Tryptamines and derivatives	62066	65556	52487	25301	60335	38491	42605	33566	69356	32824	98700	149846	105013	124655	97892	88042	84102	95015	103018	134684	2182274	1689259	1956861	1833517	2329401
250	5.72_588.53	588.535	5.725	[M+H-H2O]+	MSI 2	lipidomics	Cer 38:3;O3|Cer 18:1;O2/20:2;O	QILZMQYTJSPZAI-UHFFFAOYSA-N												Organic compounds	Lipids and lipid-like molecules	Sphingolipids	Ceramides	Long-chain ceramides	12921	4637	3116	5097	11000	4274	11199	6752	8473	9476	83153	8942	23454		22415	22189	29226	19423	78719	136760	254841	163396	241425	240594	258035
251	5.94_273.26	273.258	5.939	[M+H-C4H8O5]+	MSI 2	polyphenols	4-[5-(7-Hydroxy-5,5,8a-trimethyl-2-methylidene-3,4,4a,6,7,8-hexahydro-1H-naphthalen-1-yl)-3-methylpentoxy]-4-oxobutanoic acid	RJFVWGBZBUWHAM-UHFFFAOYSA-N	408.579	C24H40O5	CC(CCC1C(=C)CCC2C1(CC(CC2(C)C)O)C)CCOC(=O)CCC(=O)O	75368756								Organic compounds	Lipids and lipid-like molecules	Prenol lipids	Diterpenoids	Diterpenoids	346062	654247	681445	373067	415444	633388	355974	656167	396757	373992	661573	820342	554008	843099	900394	957812	671131	849709	740608	578204		9025	30472	49068	37060
252	6.04_375.23	375.23	6.036	[M+H]+	MSI 2	polyphenols	Diethyl 5,5'-methylenebis(4-ethyl-3-methyl-1H-pyrrole-2-carboxylate)	BPMQEODKNZPRMH-UHFFFAOYSA-N	374.475	C21H30N2O4	CCC1=C(NC(=C1C)C(=O)OCC)CC2=C(C(=C(N2)C(=O)OCC)C)CC	229260								Organic compounds	Organoheterocyclic compounds	Pyrroles	Pyrrole carboxylic acids and derivatives	Pyrrole carboxylic acids and derivatives	41570	120462	61071	37257	55091	64424	63798	53982	24050	90755	126415	180834	138574	129404	165145	153472	118544	108859	93365	113772	1163416	1808139	2471198	2538058	1790526
253	7.29_271.05	271.048	7.293	[M-H]-	MSI 2	biogenic amines	2-[(2-Oxo-2-phenylethyl)sulfanyl]benzoic acid	BLEPSDUOWLSFPI-UHFFFAOYSA-N	272.321	C15H12O3S	C1=CC=C(C=C1)C(=O)CSC2=CC=CC=C2C(=O)O	2769709								Organic compounds	Organic oxygen compounds	Organooxygen compounds	Carbonyl compounds	Ketones	286190	346431	289786	321630	340081	357553	380820	328879	344587	345155	392924	475491	415456	474575	479293	579277	584867	477816	391877	482393	11165	10688	14146	9567	13439
254	7.87_634.61_7.87_656.60	634.6141_656.5971	7.865_7.866	[M+H]+	MSI 2	lipidomics	Cer 41:2;O2|Cer 18:2;O2/23:0	YVMFSKMDQVDKIS-UHFFFAOYSA-N	633.606	C41H79NO3	CCCCCCCCCCCCCCCCCCCCCCC(=O)NC(CO)C(C=CCCC=CCCCCCCCCC)O	132994561								Organic compounds	Lipids and lipid-like molecules	Sphingolipids	Ceramides	Long-chain ceramides	5061	4836		7586	8319	11331	4685	4936		5771	16006	18562	19747		4910	10970	28429	10320	18200	42332	148371	198553	150598	167671	192039
255	5.47_770.58	770.577	5.472	[M+NH4]+	MSI 2	lipidomics	MGDG 34:3|MGDG 16:0_18:3	NAUNPPRXNUXMCK-UHFFFAOYSA-N	752.544	C43H76O10	CCCCCCCCCCCCCCCC(=O)OCC(COC1C(C(C(C(O1)CO)O)O)O)OC(=O)CCCCCCCC=CCC=CCC=CCC	74382274								Organic compounds	Lipids and lipid-like molecules	Glycerolipids	Glycosylglycerols	MGDG	220053	301473	285476	219644	222197	384075	242254	339107	281441	298231	353565	277106	354481	226582	330104	264131	606080	192684	286057	663168
256	8.06_191.15	191.154	8.056	[Cat]+	MSI 2	biogenic amines	1,1-Dimethyl-4-phenylpiperazin-1-ium cation	MKGIQRNAGSSHRV-UHFFFAOYSA-N	191.293	C12H19N2	C[N+]1(CCN(CC1)C2=CC=CC=C2)C	1316								Organic compounds	Organoheterocyclic compounds	Diazinanes	Piperazines	Phenylpiperazines								3503			8234	4551	11663		4608	9865			5116		132880	110837	128390	85118	140749
257	1.09_271.23	271.228	1.087	[M-H]-	MSI 2	biogenic amines	2-Hydroxy palmitic acid	JGHSBPIZNUXPLA-UHFFFAOYSA-N	272.424	C16H32O3	CCCCCCCCCCCCCCC(C(=O)O)O	92836			LMFA01050047			CHEBI:65101		Organic compounds	Lipids and lipid-like molecules	Fatty Acyls	Fatty acids and conjugates	Long-chain fatty acids	382359	191755	152062	158120	304897	231534	238480	224828	198076	160068	351430	333416	361039	414688	358386	333799	300020	236228	271999	158702	6880612	7091310	6543981	6682901	6299717
258	5.52_121.07	121.068	5.524	[M+H-H2O]+	MSI 3	biogenic amines	Phenylacetaldehyde	DTUQWGWMVIHBKE-UHFFFAOYSA-N	120.149	C8H8O	C1=CC=C(C=C1)CC=O	998	HMDB0006236	C00601		DB02178	21483	CHEBI:16424	PHENYLACETALDEHYDE	Organic compounds	Benzenoids	Benzene and substituted derivatives	Phenylacetaldehydes	Phenylacetaldehydes			3686					3691				4806		1042		1687			664	4865	100431	71789	75335	73758	90648
259	0.97_361.27	361.274	0.972	[M+H-H2O]+	MSI 2	biogenic amines	MG 20:4	RCRCTBLIHCHWDZ-DOFZRALJSA-N	378.546	C23H38O4	CCCCC/C=C\C/C=C\C/C=C\C/C=C\CCCC(=O)OC(CO)CO	5282280	HMDB0004666	C13856	LMGL01010023			CHEBI:52392		Organic compounds	Lipids and lipid-like molecules	Endocannabinoids		Endocannabinoids	338364	27959	17777	4356	280806	4192	16427	6095	4187		45724	25434	10075	37471	10370	38925	1921230	74223	66377	11540	1283327	882722	226824	446177	1140074
260	8.68_876.71_8.68_881.66	876.7075_881.663	8.68_8.676	[M+NH4]+_[M+Na]+	MSI 2	lipidomics	TG 53:9|TG 17:3_18:3_18:3	ZIYMOAFJDGAGDE-UHFFFAOYSA-N												Organic compounds	Lipids and lipid-like molecules	Glycerolipids	Triradylcglycerols	TG	367461	336717	797661	245001	636072	412934	1647540	555282	582426	430118	20067	9375	595884	109661	16143	168761	127508	14216	57473	77163	102245		608048	10744	31028
261	2.73_327.16	327.16	2.729	[M+H-2H2O]+	MSI 2	polyphenols	Secoisolariciresinol	PUETUDUXMCLALY-HOTGVXAUSA-N	362.418	C20H26O6	COC1=C(C=CC(=C1)C[C@@H](CO)[C@@H](CC2=CC(=C(C=C2)O)OC)CO)O	65373	HMDB0013692	C18167				CHEBI:65004	CPD-8909	Organic compounds	Lignans, neolignans and related compounds	Dibenzylbutane lignans	Dibenzylbutanediol lignans	Dibenzylbutanediol lignans	1260781	1391512	1979301	1002092	1640195	2285513	836563	2165500	1003293	1536239	5102115	6247995	3761022	4291039	5940207	4784080	5071907	6030481	5033292	4061909	43579	44231	33746	57451	52950
262	7.15_152.07	152.071	7.148	[M+H]+	MSI 2	biogenic amines	2,4-Dimethylnicotinic acid	XSZKVKMGSAAAJZ-UHFFFAOYSA-N	151.163	C8H9NO2	CC1=C(C(=NC=C1)C)C(=O)O	1512561								Organic compounds	Organoheterocyclic compounds	Pyridines and derivatives	Pyridinecarboxylic acids and derivatives	Pyridinecarboxylic acids	212090	274412	199192	203335	189276	237857	303301	197700	240490	225162	414130	476868	398358	398702	419840	399277	448846	422917	370500	517256	8493987	6119215	7858616	7233747	9058074
263	10.96_718.65	718.649	10.963	[M+NH4]+	MSI 2	lipidomics	CE 22:4	ITGTXSFLBABXQA-BMURBKCOSA-N	701.16	C49H80O2	CCCCC/C=C\C/C=C\C/C=C\C/C=C\CCCCCC(=O)O[C@H]1CC[C@@]2([C@H]3CC[C@]4([C@H]([C@@H]3CC=C2C1)CC[C@@H]4[C@H](C)CCCC(C)C)C)C	16061341	HMDB0006729		LMST01020018					Organic compounds	Lipids and lipid-like molecules	Sterol lipids	Steroid esters	Cholesteryl esters	5319										8297	13719	26057		21854	6487	16128	19788	11076	26098	547846	737140	452390	514211	490440
264	1.36_307.23	307.228	1.359	[M-H]-	MSI 2	lipidomics	FA 19:3;O	DQELZTNDZRPVSR-UHFFFAOYSA-N												Organic compounds	Lipids and lipid-like molecules	Fatty Acyls	Fatty acids and conjugates	Fatty acids														7534			8337		7153		64584	82245	76303	57768	83703
265	8.24_289.14	289.14	8.239	[M+H-H2O]+	MSI 2	biogenic amines	Atractylenolide IV	GYTSMBNRXNOQKU-UHFFFAOYSA-N	306.354	C17H22O5	CC1=C2CC3C(=C)C(CCC3(CC2(OC1=O)O)C)OC(=O)C	57509416								Organic compounds	Lipids and lipid-like molecules	Prenol lipids	Terpene lactones	Sesquiterpene lactones	303325	341697	224909	297246	225364	265683	436999	267461	295046	286848	606302	589345	571298	603491	668925	589182	570139	531599	574756	522369	10664017	7964332	10065566	9626800	12694316
266	7.15_228.13	228.134	7.153	[M+H]+	MSI 2	biogenic amines	2-(Benzylamino)-1-phenylethanol	XAOCLQUZOIZSHV-UHFFFAOYSA-N	227.302	C15H17NO	C1=CC=C(C=C1)CNCC(C2=CC=CC=C2)O	229746								Organic compounds	Benzenoids	Benzene and substituted derivatives	Phenylmethylamines	Phenylmethylamines	581598	630655	463769	446998	424565	481938	564535	504573	497488	457071	1048441	1159769	1058991	1161049	1089936	1048751	1108067	1016306	977328	1124757
267	5.85_451.21	451.215	5.851	[M+H]+	MSI 2	biogenic amines	Cediranib	XXJWYDDUDKYVKI-UHFFFAOYSA-N	450.506	C25H27FN4O3	CC1=CC2=C(N1)C=CC(=C2F)OC3=NC=NC4=CC(=C(C=C43)OC)OCCCN5CCCC5	9933475		D08881		DB04849				Organic compounds	Organic oxygen compounds	Organooxygen compounds	Ethers	Diarylethers	124793	100680	81459	93352	70630	99286	135329	94053	102310	92704	271184	282355	310143	278213	239034	254619	287390	241299	216719	259544				3090
268	1.43_410.29	410.29	1.427	[M+H-H2O]+	MSI 2	biogenic amines	Prostaglandin F2.alpha. serinolamide	IRAOUIWKWHBHDC-GKUWGJHRSA-N	427.576	C23H41NO6	CCCCC[C@@H](/C=C/[C@H]1[C@@H](C[C@@H]([C@@H]1C/C=C\CCCC(=O)NC(CO)CO)O)O)O	24778495			LMFA03010193					Organic compounds	Lipids and lipid-like molecules	Fatty Acyls	Eicosanoids	Prostaglandins and related compounds	1564695	1275904	1199003	1032535	1218342	1041671	1771436	1304220	1175880	1088190	1499268	1836535	1576520	1607485	1488140	1526027	1470248	1710974	1490626	1694580	42142	57457	50995	15121	28434
269	6.00_354.21	354.207	5.996	[M+H]+	MSI 2	polyphenols	Cyclostachnine B	QXSFPRUSCMGQOM-LNNXQNCSSA-N	353.456	C22H27NO3	C1CC[C@H]2[C@H](C1)C=C[C@@H]([C@@H]2C(=O)N3CCCC3)C4=CC5=C(C=C4)OCO5	51055151								Organic compounds	Organoheterocyclic compounds	Benzodioxoles		Benzodioxoles	15333509	527213	287992	649609	294914	504066	610506	291808	105051	523136	505921	485916	259097	573057	601905	602495	357705	922190	428856	347213	11757		25404
270	2.76_138.02	138.019	2.756	[M-H]-	MSI 2	biogenic amines	6-Hydroxynicotinic acid	BLHCMGRVFXRYRN-UHFFFAOYSA-N	139.109	C6H5NO3	C1=CC(=O)NC=C1C(=O)O	72924	HMDB0002658	C01020				CHEBI:16168		Organic compounds	Organoheterocyclic compounds	Pyridines and derivatives	Pyridinecarboxylic acids and derivatives	Pyridinecarboxylic acids	124709	87809	80132	85572	73453	107853	100679	59562	60940	50374	148858	78750	83248	72999	67703	109307	125902	99877	137939	129311	1443843	1048586	1458760	1523786	1620053
271	6.22_699.50	699.495	6.219	[M+Na]+	MSI 2	lipidomics	DG 41:9	WLSNBDKAYFVRSJ-UHFFFAOYSA-N												Organic compounds	Lipids and lipid-like molecules	Glycerolipids	Diradylglycerols	DG	15343	62952	29368	9663	104341	27678	12324	30737	22019	36522	6627										1127722	1656812	1204806	1658038	1373918
272	9.53_877.76	877.762	9.531	[M+Na]+	MSI 2	lipidomics	TG O-53:4|TG O-17:2_18:1_18:1	SOYKGVGYRJWESX-UHFFFAOYSA-N												Organic compounds	Lipids and lipid-like molecules	Glycerolipids	Triradylcglycerols	TG	93182	142174	94023	117774	156075	138976	118517	117376	145876	140555	109360	103121	128336	137987	101033	81895	114653	100249	90891	109102
273	8.94_873.70	873.699	8.936	[M+Na]+	MSI 2	lipidomics	TG 52:6|TG 17:2_17:2_18:2	FDAPFDJYZCPBJG-UHFFFAOYSA-N												Organic compounds	Lipids and lipid-like molecules	Glycerolipids	Triradylcglycerols	TG	331414	411524	754175	217902	728544	388907	1351772	503804	462387	341678	30225	5294	301335	69435	10013	96877	149041	5025	58986	94343	64555		532386	8194	34142
274	8.85_760.68	760.682	8.848	[M+NH4]+	MSI 2	lipidomics	SE 24:1;O4/24:0	NGWQOPBVAPEBNW-UHFFFAOYSA-N												Organic compounds	Lipids and lipid-like molecules	Sterol lipids	Steroid esters	SE	190169	207717	167142	147094	173552	184108	209669	165194	188688	166451	279882	273800	324858	241014	225424	272703	280298	283525	266900	341763	5211		7816
275	6.86_574.52	574.52	6.856	[M+H-H2O]+	MSI 2	lipidomics	Cer 37:3;O3|Cer 20:1;O2/17:2;O	GPKNPKNQKMLPNF-UHFFFAOYSA-N												Organic compounds	Lipids and lipid-like molecules	Sphingolipids	Ceramides	Long-chain ceramides	7017	23075	5777	10729	25698	9734	10704	6548	10448	7899	2581	2812	8248		4009		8936		5302	7118	609148	349427	583360	699475	666981
276	5.01_258.11	258.109	5.014	[M+H]+	MSI 3	biogenic amines	2'-O-Methylcytidine	RFCQJGFZUQFYRF-ZOQUXTDFSA-N	257.244	C10H15N3O5	CO[C@@H]1[C@@H]([C@H](O[C@H]1N2C=CC(=NC2=O)N)CO)O	150971								Organic compounds	Nucleosides, nucleotides, and analogues	Pyrimidine nucleosides		Pyrimidine nucleosides							4605		4933	3043	11922		7626	13211		7726	19150	6364	14403	7661	148078	126738	147665	158715	192340
277	4.88_557.42	557.418	4.88	[M+Na]+	MSI 2	lipidomics	DG 30:3	HSQDUNLUMCNXOX-UHFFFAOYSA-N												Organic compounds	Lipids and lipid-like molecules	Glycerolipids	Diradylglycerols	DG			17211						6153												275900	317856	343536	293050	362457
278	8.75_168.99	168.99	8.752	[M+Cl]-	MSI 3	biogenic amines	Dihydroxyacetone phosphate	GNGACRATGGDKBX-UHFFFAOYSA-N	170.058	C3H7O6P	C(C(=O)COP(=O)(O)O)O	668	HMDB0001473	C00111		DB04326		CHEBI:16108		Organic compounds	Organic oxygen compounds	Organooxygen compounds	Carbohydrates and carbohydrate conjugates	Monosaccharides	66401	38256	32465	28413	33945	38104	53950	44359	34227	44257		776					2136	7691				1366		1011	979
279	5.26_137.06	137.06	5.259	[M+H-C13H20N2]+	MSI 2	polyphenols	1-Benzyl-4-(3-ethoxy-4-methoxybenzyl)piperazine	NMXVSQSDGLXNRU-UHFFFAOYSA-N	340.46	C21H28N2O2	CCOC1=C(C=CC(=C1)CN2CCN(CC2)CC3=CC=CC=C3)OC	763298								Organic compounds	Benzenoids	Benzene and substituted derivatives	Phenylmethylamines	Phenylmethylamines	1046221	1490360	743595	395832	1445247	2209164	2175749	2888298	2010052	2210180	1304084	1490444	1232655	1251957	1580847	1273593	1227996	1631432	1097725	974752	44653	47364	37906	145081	52026
280	4.92_647.51	647.514	4.918	[M-H]-	MSI 2	lipidomics	PE-Cer 33:0;2O|PE-Cer 17:0;2O/16:0	WQVGYQQXAUGCNE-UHFFFAOYSA-N												Organic compounds	Lipids and lipid-like molecules	Sphingolipids	Phosphosphingolipids	PE-Cer	173124	151832	159873	130973	142419	194424	144010	174922	140347	142937	558636	620717	595524	613783	678738	694048	633885	587877	514513	736110			5655		6514
281	5.96_78.03	78.0341	5.96	[M+H]+	MSI 2	biogenic amines	Cysteamine	UFULAYFCSOUIOV-UHFFFAOYSA-N	77.1499	C2H7NS	C(CS)N	6058	HMDB0002991	C01678		DB00847	22875	CHEBI:17141		Organic compounds	Organosulfur compounds	Thiols	Alkylthiols	Alkylthiols	72728	66199	68542	56634	61677	69625	60868	61044	66208	66897	69307	67306	73231	70014	61817	95420	68273	88831	86678	100755	1629303	1262886	1530995	1394930	1735927
282	7.74_208.07	208.069	7.742	[M+H]+	MSI 2	biogenic amines	3-{3-oxo-2H,3H-[1,2,4]Triazolo[4,3-a]pyridin-2-yl}propanoic acid	DXVGDKXFBVHCCE-UHFFFAOYSA-N	207.186	C9H9N3O3	C1=CC2=NN(C(=O)N2C=C1)CCC(=O)O	198292	HMDB0061058							Organic compounds	Organoheterocyclic compounds	Azoles	Triazoles	Triazolones							21049				42256	51959	33991	4006	75419	86158	59567	36183	39960	68046	974443	736371	932008	813702	1043048
283	11.29_642.62	642.618	11.29	[M+NH4]+	MSI 2	lipidomics	CE 16:0	BBJQPKLGPMQWBU-JADYGXMDSA-N	625.064	C43H76O2	CCCCCCCCCCCCCCCC(=O)O[C@H]1CC[C@@]2([C@H]3CC[C@]4([C@H]([C@@H]3CC=C2C1)CC[C@@H]4[C@H](C)CCCC(C)C)C)C	246520	HMDB0000885	C11251	LMST01020005					Organic compounds	Lipids and lipid-like molecules	Sterol lipids	Steroid esters	Cholesteryl esters	7793	13472	4989		13997		11100	10019		18616		10775	10553	16594	18417		10975	11752	24674	25804	396786	506682	353787	488263	393618
284	2.81_244.13	244.133	2.807	[M+H-C10H15F3N2O2]+	MSI 2	biogenic amines	Silodosin	PNCPYILNMDWPEY-QGZVFWFLSA-N	495.535	C25H32F3N3O4	C[C@H](CC1=CC2=C(C(=C1)C(=O)N)N(CC2)CCCO)NCCOC3=CC=CC=C3OCC(F)(F)F	5312125		D01965		DB06207				Organic compounds	Organoheterocyclic compounds	Indoles and derivatives	Indolecarboxylic acids and derivatives	Indolecarboxamides and derivatives	12027	12581	3257	15949	6844	8746	8495	10997		15898	38960	25844	43198	38555	25464	44654	51535	34595	34608	6349	393075	308800	378786	335014	383532
285	0.96_164.11	164.107	0.959	[M+H-C4H9NO]+	MSI 2	polyphenols	Propetamide	VVUMWAHNKOLVSN-UHFFFAOYSA-N	250.337	C14H22N2O2	CCCNC(=O)C(C)NC1=CC=C(C=C1)OCC	68937								Organic compounds	Organic acids and derivatives	Carboxylic acids and derivatives	Amino acids, peptides, and analogues	Amino acids and derivatives	9978		4201	18710	9488	30292	15310	63010	10559	29973	3853	5811	3929	23797	33948	32667	1900	9441			209859	241070	174719	262844	236152
286	7.41_810.68_7.41_832.66	810.6824_832.6633	7.405_7.407	[M+H]+_[M+H-H2O]+	MSI 3	lipidomics	GlcCer d42:2	WBOZIXHPUPAOIA-RBELZSLISA-N	810.24	C48H91NO8	CCCCCCCCCCCCC/C=C/[C@H]([C@H](CO[C@H]1C(C([C@@H]([C@H](O1)CO)O)O)O)NC(=O)CCCCCCCCCCCCC/C=C\CCCCCCCC)O	6321360			LMSP0501AA08					Organic compounds	Lipids and lipid-like molecules	Sphingolipids	Glycosphingolipids	Neutral glycosphingolipids											4519	8556			13950	10963	17406	5277	15448	13645	198420	236923	207120	191208	237802
287	11.75_862.82_11.75_867.78	862.8224_867.7776	11.746_11.748	[M+NH4]+_[M+Na]+	MSI 2	lipidomics	TG O-52:2|TG O-18:1_16:0_18:1	SRSFVHXSVPMBMY-UHFFFAOYSA-N												Organic compounds	Lipids and lipid-like molecules	Glycerolipids	Triradylcglycerols	TG	16130	34680	10414	27595	19153	8402	23659	25539													1196230	1263772	1005159	1644995	1371507
288	1.74_164.09	164.093	1.742	[M+H]+	MSI 2	biogenic amines	Dimethylaminopurine	BVIAOQMSVZHOJM-UHFFFAOYSA-N	163.18	C7H9N5	CN(C)C1=NC=NC2=C1NC=N2	3134	HMDB0000473					CHEBI:60281		Organic compounds	Organoheterocyclic compounds	Imidazopyrimidines	Purines and purine derivatives	6-aminopurines		21297																	34138		629594	364473	542163	449610	715798
289	3.31_456.41	456.405	3.305	[M+H]+	MSI 2	lipidomics	CAR 20:0	SVJLJQBGUITFLI-UHFFFAOYSA-N	455.715	C27H53NO4	CCCCCCCCCCCCCCCCCCCC(=O)OC(CC(=O)[O-])C[N+](C)(C)C	53477833	HMDB0006460					CHEBI:73100		Organic compounds	Lipids and lipid-like molecules	Fatty Acyls	Fatty acid esters	Acyl carnitines	82910	122582	78538	79712	74515	111023	93143	67786	92824	85291	176583	181944	244711	270325	212585	210333	220140	191967	188717	240660	3096170	2816196	2952828	2808377	2785637
290	6.84_124.99	124.99	6.839	[M-H]-	MSI 2	biogenic amines	Ethyl sulfate	KIWBPDUYBMNFTB-UHFFFAOYSA-N	126.133	C2H6O4S	CCOS(=O)(=O)O	57448826	HMDB0031233							Organic compounds	Organic acids and derivatives	Organic sulfuric acids and derivatives	Sulfuric acid esters	Sulfuric acid monoesters	876841	813907	563978	802374	624752	714199	902004	804407	708659	747666	1990573	2228049	2254480	1977056	2247301	1571858	1665120	2207185	1734157	2013043	38873	24619	42736	36321	36567
291	7.68_735.59	735.59	7.678	[M+Na]+	MSI 2	lipidomics	DG 43:5	YVVJGGTVMAWIKG-UHFFFAOYSA-N												Organic compounds	Lipids and lipid-like molecules	Glycerolipids	Diradylglycerols	DG	113013	120965	89137	95326	55215	85493	82738	78886	96672	93799	131591	152436	115095	132925	108929	105526	121394	120489	121691	190788
292	6.39_585.27	585.272	6.388	[M+K]+	MSI 3	polyphenols	Bilirubin	BPYKTIZUTYGOLE-IFADSCNNSA-N	584.663	C33H36N4O6	CC1=C(NC(=C1CCC(=O)O)CC2=C(C(=C(N2)/C=C\3/C(=C(C(=O)N3)C)C=C)C)CCC(=O)O)/C=C\4/C(=C(C(=O)N4)C=C)C	5280352	HMDB0000054	C00486				CHEBI:16990		Organic compounds	Organoheterocyclic compounds	Tetrapyrroles and derivatives	Bilirubins	Bilirubins	15308							22963	7266		28383	23760	16447	53286	96441	69219	20237	14684	35560	92874	144034	304778	15381	366644	39603
293	3.98_397.16	397.163	3.98	[M+Na]+	MSI 2	polyphenols	1,7-Bis(3,4-dihydroxyphenyl)heptan-3-yl acetate	UWNADLMLMRTPFL-UHFFFAOYSA-N	374.428	C21H26O6	CC(=O)OC(CCCCC1=CC(=C(C=C1)O)O)CCC2=CC(=C(C=C2)O)O	24013835								Organic compounds	Phenylpropanoids and polyketides	Diarylheptanoids	Linear diarylheptanoids	Linear diarylheptanoids	128346	165830	109125	49811	175187	149287	311469	274981	163311	355434	64739	81906	131342	93154	76042	99625	60590	124583	66802	58046				56914
294	5.27_868.51	868.508	5.272	[M+H]+	MSI 2	polyphenols	.alpha.-Solanine	ZGVSETXHNHBTRK-UHFFFAOYSA-N	868.061	C45H73NO15	CC1CCC2C(C3C(N2C1)CC4C3(CCC5C4CC=C6C5(CCC(C6)OC7C(C(C(C(O7)CO)O)OC8C(C(C(C(O8)CO)O)O)O)OC9C(C(C(C(O9)C)O)O)O)C)C)C	262500	HMDB0034202							Organic compounds	Lipids and lipid-like molecules	Sterol lipids	Steroidal glycosides	Steroidal saponins	175909	168535	704373	101003	302337	217434	159417	269845	77751	138491	79506	140876	75574	107994	127794	125158	87798	193587	96250	71577	3002	44934	4348		5772
295	5.67_697.48_5.67_681.51	697.4808_681.5070	5.669_5.674	[M+Na]+_[M+H]+	MSI 2	lipidomics	DG 41:10	DWPNOQSRJMVMLH-UHFFFAOYSA-N												Organic compounds	Lipids and lipid-like molecules	Glycerolipids	Diradylglycerols	DG	51578	175625	89785	72103	231079	68435	171237	104138	74457	109198	9042	7034	24696	17751	16738		22789	15817	19925	9919	1967950	2319947	1922012	2115780	1716159
296	12.16_878.87	878.87	12.164	[M+NH4]+	MSI 2	lipidomics	TG O-53:1|TG O-19:1_16:0_18:0	HEIHFCIAEGUOQL-UHFFFAOYSA-N												Organic compounds	Lipids and lipid-like molecules	Glycerolipids	Triradylcglycerols	TG	114625	86537	134496	112443	129096	108685	102468	108689	113281	119969	139791	103250	154662	78971	100874	91655	143679	117852	147685	140299
297	1.56_255.10	255.098	1.557	[M+H]+	MSI 2	biogenic amines	Fenbufen	ZPAKPRAICRBAOD-UHFFFAOYSA-N	254.281	C16H14O3	C1=CC=C(C=C1)C2=CC=C(C=C2)C(=O)CCC(=O)O	3335		D01344			23043	CHEBI:31599		Organic compounds	Organic oxygen compounds	Organooxygen compounds	Carbonyl compounds	Ketones																				9549	171840	136252	223006	157894	363893
298	8.48_204.10	204.098	8.485	[M+H]+	MSI 2	biogenic amines	Gly-Gly-Ala	CCQOOWAONKGYKQ-BYPYZUCNSA-N	203.196	C7H13N3O4	C[C@@H](C(=O)[O-])NC(=O)CNC(=O)C[NH3+]	6992377						CHEBI:73899		Organic compounds	Organic acids and derivatives	Carboxylic acids and derivatives	Amino acids, peptides, and analogues	Peptides	40614	58239	27380	49731	34893	46549	77590	38572	51432	45901	117583	116180	125145	139129	137367	117577	83479	119047	104567	133893	1733296	1344133	1761579	1477712	1870396
299	5.71_355.23	355.234	5.711	[M+H-H2O]+	MSI 2	biogenic amines	Xysmalogenin	ZICGJBPBLVXOBM-MITUEXOSSA-N	372.499	C23H32O4	C[C@]12CC[C@@H](CC1=CC[C@@H]3[C@@H]2CC[C@]4([C@@]3(CC[C@@H]4C5=CC(=O)OC5)O)C)O	12302371								Organic compounds	Lipids and lipid-like molecules	Sterol lipids	Steroid lactones	Steroid lactones	149299	162444	134029	115650	66971	132211	174638	107609	140083	130210	338797	295134	335182	325899	276999	322438	374057	350386	238072	318434	6625	9407	8114	4563	7712
300	17049	368	982497	[M]*+	MSI 1	primary metabolism	Epicatechin	PFTAWBLQPZVEMU-UKRRQHHQSA-N	290.269	C15H14O6	C1[C@H]([C@H](OC2=CC(=CC(=C21)O)O)C3=CC(=C(C=C3)O)O)O	72276	HMDB0001871	C09727	LMPK12020003			CHEBI:90	CPD-7630	Organic compounds	Phenylpropanoids and polyketides	Flavonoids	Flavans	Flavan-3-ols	290	319	186	305	208	413	266	386	209	350	333	1989	254	234	593	361	323	420	518	492	5962	4901	6075	5746	5716
301	1.35_175.09	175.087	1.35	[M+H]+	MSI 3	biogenic amines	1H-Indole-3-acetamide	ZOAMBXDOGPRZLP-UHFFFAOYSA-N	174.2	C10H10N2O	C1=CC=C2C(=C1)C(=CN2)CC(=O)N	397	HMDB0029739	C02693		DB08652		CHEBI:16031	CPD-237	Organic compounds	Organoheterocyclic compounds	Indoles and derivatives	Indoles	3-alkylindoles	142080	186149	141781	141137	189995	200295	121887	115517	143097	138314	172993	190995	189540	190739	164972	162045	183392	121817	195115	119026
302	1.75_315.23	315.233	1.75	[M-H]-	MSI 2	lipidomics	Heneicosapentaenoic acid	OQOCQFSPEWCSDO-JLNKQSITSA-N	316.478	C21H32O2	CC/C=C\C/C=C\C/C=C\C/C=C\C/C=C\CCCCC(=O)O	11998573			LMFA01030823					Organic compounds	Lipids and lipid-like molecules	Fatty Acyls	Fatty acids and conjugates	Long-chain fatty acids	6692	13534	14898	20825	26279	20449	14599	27082	9344	43511	45641	60427	60720	67835	65003	57851	82056	35478	50024	98347	897465	974047	695827	885746	870634
303	6.08_206.09	206.093	6.085	[M+H]+	MSI 2	biogenic amines	2-Amino-3-{1H-pyrrolo[3,2-b]pyridin-3-yl}propanoic acid	FICCYWIDRZLXIS-UHFFFAOYSA-N	205.214	C10H11N3O2	C1=CC2=C(C(=CN2)CC(C(=O)O)N)N=C1	22326237								Organic compounds	Organic acids and derivatives	Carboxylic acids and derivatives	Amino acids, peptides, and analogues	Amino acids and derivatives	3426	12927	12295	10893	13833	9821	28103	4790	8700	8753	18559	22561	23075	9199	20662	20607	13197	31553	32784	26388	310716	263512	271344	321107	271724
304	7.19_260.20	260.202	7.19	[M+H-H2O]+	MSI 2	polyphenols	2-Butanol, 1-[(2,3-dihydro-7-methyl-1H-inden-4-yl)oxy]-3-[(1-methylethyl)amino]-, (2R,3R)-rel-	VFIDUCMKNJIJTO-CJNGLKHVSA-N	277.402	C17H27NO2	CC1=C2CCCC2=C(C=C1)OC[C@@H]([C@@H](C)NC(C)C)O	104824								Organic compounds	Benzenoids	Indanes		Indanes	850454	958325	1160556	573585	943493	1447387	686760	1525518	710587	982689	1791104	2120484	1137227	1603526	2077081	1782980	1589419	1957994	1711827	1582396	58519	55135	48835	58522	54603
305	5.83_130.07	130.065	5.832	[M+H-H2O]+	MSI 2	polyphenols	6,7-Dihydroisoquinolin-8(5H)-one	WFZAOWUFFCIBNP-UHFFFAOYSA-N	147.174	C9H9NO	C1CC2=C(C=NC=C2)C(=O)C1	11105511								Organic compounds	Organic oxygen compounds	Organooxygen compounds	Carbonyl compounds	Ketones	22708	70310	21668	19005	24616	59423	20828	40417	28879	24495	45223	44067	23233	46047	58412	47748	24334	62842	55988	30040	485802	441884	380190	849674	837842
306	5.35_322.20	322.202	5.346	[M+H]+	MSI 2	biogenic amines	Benzenehexanamide, .beta.-hydroxy-N-[1-(hydroxymethyl)-3-methylbutyl]-.delta.-oxo-	AZUKRZGSIRBRCH-UHFFFAOYSA-N	321.412	C18H27NO4	CC(C)CC(CO)NC(=O)CC(CC(=O)CC1=CC=CC=C1)O	44715241								Organic compounds	Lipids and lipid-like molecules	Fatty Acyls	Fatty amides	N-acyl amines	3970287	4434934	3111306	3339778	3042932	3992867	5456243	3752619	3483300	3946619	8625116	9099691	9345253	9291174	8936328	9281288	9575986	9615357	7132245	8071587	258896	221895	262517	265891	285246
307	0.67_171.14	171.138	0.667	[M-H]-	MSI 1	lipidomics	FA 10:0 (capric acid)	GHVNFZFCNZKVNT-UHFFFAOYSA-N	172.265	C10H20O2	CCCCCCCCCC(=O)O	2969	HMDB0000511	C01571	LMFA01010010	DB03600	21554	CHEBI:30813		Organic compounds	Lipids and lipid-like molecules	Fatty Acyls	Fatty acids and conjugates	Medium-chain fatty acids	170802	269657	233382	440804	329616	292717	320332	448078	345933	279313	1444484	1592522	1579803	1510949	1502239	1287420	1253602	1368372	1366086	1619662	1365348	1063168	1776669	1095783	1243944
308	4.48_582.55	582.546	4.478	[M+H]+	MSI 2	lipidomics	Cer 36:1;O3|Cer 18:1;O2/18:0;O	ZNZKGWLGVHSOIV-UHFFFAOYSA-N	581.955	C36H71NO4	CCCCCCCCCCCCCCCCC(C(=O)NC(CO)C(C=CCCCCCCCCCCCCC)O)O	87115120								Organic compounds	Lipids and lipid-like molecules	Sphingolipids	Ceramides	Long-chain ceramides	32717	61668	44224	51647	59687	46150	45922	45274	38105	40599	107985	124354	138714	69344	99420	98405	95129	115466	155972	171976	1154619	1175591	1033753	1037807	1332053
309	5.48_548.50_5.48_530.49	548.5039_530.4929	5.484_5.484	[M+H]+_[M+H-H2O]+	MSI 2	lipidomics	Cer 35:3;O2|Cer 19:3;O2/16:0	XAAAJVUZCYVFBM-UHFFFAOYSA-N												Organic compounds	Lipids and lipid-like molecules	Sphingolipids	Ceramides	Long-chain ceramides	69601	187123	75464	130552	120477	357915	56334	116534	98736	102092	345070	253025	209130	99887	245468	178915	280365	220228	290543	274216	3876164	3039930	2774713	2821036	2864351
310	5.68_240.16	240.16	5.685	[M+H]+	MSI 2	biogenic amines	Albuterol	NDAUXUAQIAJITI-UHFFFAOYSA-N	239.311	C13H21NO3	CC(C)(C)NCC(C1=CC(=C(C=C1)O)CO)O	2083		D02147		DB01001	21255			Organic compounds	Benzenoids	Benzene and substituted derivatives	Benzyl alcohols	Benzyl alcohols	21029	19300	11220	17750	4112	17525	27127	11145	10645	30246	44359	61449	65834	37503	61974	54947	75235	59910	20028	40640	544062	421880	565268	488530	621620
311	4.79_201.16	201.164	4.792	[M+H-C9H12O4]+	MSI 2	polyphenols	Cinnamoylechinadiol	JBAYXBWJNDAHDZ-OOADYMPDSA-N	384.5	C24H32O4	C/C/1=C/CC[C@]2([C@@H](O2)[C@@H]([C@@H]([C@@H](C1)OC(=O)/C=C/C3=CC=CC=C3)C(C)C)O)C	101321311								Organic compounds	Lipids and lipid-like molecules	Prenol lipids	Sesquiterpenoids	Germacrane sesquiterpenoids	45191	60109	79597	26691	73118	110209	16280	107756	27172	73450	145820	165709	92613	124055	147600	108419	140225	165105	116933	103527	4503	4585			8230
312	10.14_892.80_10.15_913.73	892.7971_913.7272	10.139_10.148	[M+NH4]+_[M+K]+	MSI 2	lipidomics	TG 52:2;1O|TG 16:0_18:0_18:2;1O	WDXHOZPTDSCPTC-UHFFFAOYSA-N												Organic compounds	Lipids and lipid-like molecules	Glycerolipids	Triradylcglycerols	TG	37638				17417					22605		4479								10642	1094245	381791	672928	982260	497253
313	5.19_752.52	752.522	5.193	[M+K]+	MSI 1	lipidomics	PC 32:2	GPWHCUUIQMGELX-VHQDNGOZSA-N	730.009	C40H76NO8P	CCCCCC/C=C\CCCCCCCC(=O)OC[C@H](COP(=O)([O-])OCC[N+](C)(C)C)OC(=O)CCCCCCC/C=C\CCCCCC	24778764	HMDB0008002		LMGP01010684			CHEBI:83717		Organic compounds	Lipids and lipid-like molecules	Glycerophospholipids	Glycerophosphocholines	PC					8475											6051		5569		7959	44428	16577	78416	48548	126288
314	5.31_405.20	405.202	5.307	[M+Na]+	MSI 2	biogenic amines	Farnesiferol A	FCWYNTDTQPCVPG-WTMJVXIESA-N	382.493	C24H30O4	C[C@@]12CC[C@H](C([C@H]1CCC(=C)[C@@H]2COC3=CC4=C(C=C3)C=CC(=O)O4)(C)C)O	7067262								Organic compounds	Phenylpropanoids and polyketides	Coumarins and derivatives		Coumarins and derivatives	62259	72495	60258	55871	46246	63649	108426	60840	61632	71014	225220	171581	187890	207596	196985	179896	157585	158366	158301	181935			4719		5171
315	1.40_207.07_1.39_243.04	207.0659_243.0431	1.399_1.394	[M-H]-	MSI 2	biogenic amines	DL-Benzylsuccinic acid	GTOFKXZQQDSVFH-UHFFFAOYSA-N	208.211	C11H12O4	C1=CC=C(C=C1)CC(CC(=O)O)C(=O)O	3858	HMDB0142179					CHEBI:16054		Organic compounds	Phenylpropanoids and polyketides	Phenylpropanoic acids		Phenylpropanoic acids	145843	129842	95277	109733	81380	113502	175455	112367	131866	121325	268576	317206	261309	236518	251946	291982	232798	263799	277507	270770	3554800	2394584	3756888	3999331	4091193
316	3.48_356.22	356.222	3.479	[M+H]+	MSI 2	biogenic amines	Cyprodime	INUCRGMCKDQKNA-CEMLEFRQSA-N	355.471	C22H29NO3	COC1=CC=CC2=C1[C@]34CCN([C@H](C2)[C@@]3(CCC(=O)C4)OC)CC5CC5	5748293								Organic compounds	Benzenoids	Phenanthrenes and derivatives		Phenanthrenes and derivatives	96486	101498	79033	56054	95890	82771	115086	89427		87067	202366	230259	231220	230938	218678	239410	211372	210082	207131		4181	2965	6499		4811
317	5.04_892.62	892.62	5.04	[M-H]-	MSI 2	lipidomics	SHexCer 41:1;O3	DAXHJDBGLDKQAU-UHFFFAOYSA-N												Organic compounds	Lipids and lipid-like molecules	Sphingolipids	Glycosphingolipids	SHexCer	5608	8894	4751	9296	13600	3826		11196	4942	6876			2092	1112	42549	54481	53668	66738	43271	74968		3662	10491	201641	143224
318	9.38_527.16	527.159	9.383	[M+Na]+	MSI 2	biogenic amines	Gentianose	MUPFEKGTMRGPLJ-WSCXOGSTSA-N	504.438	C18H32O16	C([C@@H]1[C@H]([C@@H]([C@H]([C@@H](O1)OC[C@@H]2[C@H]([C@@H]([C@H]([C@H](O2)O[C@]3([C@H]([C@@H]([C@H](O3)CO)O)O)CO)O)O)O)O)O)O)O	117678		C08239				CHEBI:28782		Organic compounds	Organic oxygen compounds	Organooxygen compounds	Carbohydrates and carbohydrate conjugates	Oligosaccharides	94449	71783	82472	87233	117654	91219	64366	70758	110959	77477	163418	126070	117188	107628	130415	133114	123285	121021	169018	171095			4313
319	6.11_348.29	348.288	6.109	[M+H]+	MSI 2	polyphenols	O-Arachidonoylethanolamine	DLHLOYYQQGSXCC-DOFZRALJSA-N	347.536	C22H37NO2	CCCCC/C=C\C/C=C\C/C=C\C/C=C\CCCC(=O)OCCN	5712057	HMDB0013655		LMFA00000014					Organic compounds	Lipids and lipid-like molecules	Fatty Acyls	Fatty acid esters	Fatty acid esters	108134	64119	40422	13937	10970	30329	10410		25586	35794	99963	33981	75341	128804	101680	147591	85440	143805	79653	41951	651175	823151	860706	975070	1309016
320	6.04_152.08	152.082	6.037	[M-H]-	MSI 1	biogenic amines	N-Acetyl-L-glutamine	KSMRODHGGIIXDV-YFKPBYRVSA-N	188.181	C7H12N2O4	CC(=O)N[C@@H](CCC(=O)N)C(=O)O	182230		D07063		DB04167		CHEBI:21553		Organic compounds	Organic acids and derivatives	Carboxylic acids and derivatives	Amino acids, peptides, and analogues	Amino acids and derivatives	29567	29358	22550	25650	21807	28463	40191	26327	27554	28601	70306	67911	67717	70903	67732	73004	68781	70344	71024	73479	700999	564812	678878	644585	770908
321	6.97_644.60_6.96_666.58	644.5965_666.5775	6.968_6.965	[M+H]+	MSI 2	lipidomics	Cer 42:4;O2|Cer 18:1;O2/24:3	MRVHMHLOVRJTKO-UHFFFAOYSA-N												Organic compounds	Lipids and lipid-like molecules	Sphingolipids	Ceramides	Long-chain ceramides		8832	3544								14038	5214	5967		3880	12432	5082		8631	6133	59540	43413	50491	46123	43285
322	8.69_306.13	306.13	8.692	[M+H]+	MSI 2	biogenic amines	m-Hydroxybenzoylecgonine	XCJJCRPRQYXLRE-AHLTXXRQSA-N	305.326	C16H19NO5	CN1[C@H]2CC[C@@H]1[C@H]([C@H](C2)OC(=O)C3=CC(=CC=C3)O)C(=O)O	448357								Organic compounds	Benzenoids	Benzene and substituted derivatives	Benzoic acids and derivatives	Benzoic acid esters	1028702	1110026	1035967	1080793	853593	1181093	1351941	1140317	1014447	1175893	1791919	2171046	1810717	1946666	1827330	2107168	1823627	1531997	1870678	2244040	69607	42406	67507	47435	68172
323	5.87_220.12	220.119	5.865	[M+H]+	MSI 2	biogenic amines	trans-Zeatin	UZKQTCBAMSWPJD-FARCUNLSSA-N	219.244	C10H13N5O	C/C(=C\CNC1=NC=NC2=C1NC=N2)/CO	449093	HMDB0012204	C00371			44095	CHEBI:15333	CPD-4210	Organic compounds	Organoheterocyclic compounds	Imidazopyrimidines	Purines and purine derivatives	6-aminopurines	6049775	6046880	5091741	4860554	4593323	5537344	6910904	4881544	5639442	5367920	12264790	12179011	14225007	12810812	11878886	11783164	13717450	10790738	11521233	11990641	159743667	122373977	166830837	150477939	183030787
324	1.41_313.27	313.275	1.409	[M-H]-	MSI 2	lipidomics	FA 19:0;O	AYXLWRQJGAPKEN-UHFFFAOYSA-N	314.282	C19H38O3	CCCCCCCCCCC(CCCCCCCC(=O)O)O	85766748								Organic compounds	Lipids and lipid-like molecules	Fatty Acyls	Fatty acids and conjugates	Long-chain fatty acids	240966	240268	281481	278554	278966	241726	210041	274913	236928	238167	535427	641452	680385	672816	673287	719237	806222	628198	813153	1169574	6964017	6853042	6600984	5873985	6809909
325	9.52_259.02	259.022	9.522	[M-H]-	MSI 1	biogenic amines	Fructose 1-phosphate	RHKKZBWRNHGJEZ-ARQDHWQXSA-N	260.136	C6H13O9P	C([C@@H]1[C@H]([C@@H]([C@](O1)(COP(=O)(O)O)O)O)O)O	10400369	HMDB0001076							Organic compounds	Organic oxygen compounds	Organooxygen compounds	Carbohydrates and carbohydrate conjugates	Monosaccharides	454510	637258	304342	413148	205818	427955	861155	522253	614079	595220	17124	43872	30828	24719	23234	49659	15502	35147	5664	9688	7398	15666	5617	28423	5949
326	8.10_812.70_8.10_834.68	812.6980_834.6797	8.100_8.102	[M+H]+_[M+Na]+	MSI 3	lipidomics	GlcCer d42:1	SNVYJLGKALMFOP-MOLROICHSA-N	812.256	C48H93NO8	CCCCCCCCCCCCCCC[C@H]([C@H](CO[C@H]1C(C([C@@H]([C@H](O1)CO)O)O)O)NC(=O)CCCCCCCCCCCCC/C=C\CCCCCCCC)O	6321367			LMSP0501AA22					Organic compounds	Lipids and lipid-like molecules	Sphingolipids	Glycosphingolipids	Neutral glycosphingolipids	3968	10728	7937	11085				4417			20376	18503	24380	10497	21075	19405	42564	34664	21332	36180	361067	333199	284630	261432	327589
327	9.85_740.68_9.85_745.63	740.6766_745.6317	9.851_9.854	[M+NH4]+_[M+Na]+	MSI 1	lipidomics	TG 42:0|TG 12:0_14:0_16:0	PGZSAELMQZLYOA-UHFFFAOYSA-N	722.642	C45H86O6	CCCCCCCCCCCCCCCC(=O)OCC(COC(=O)CCCCCCCCCCC)OC(=O)CCCCCCCCCCCCC	92036844								Organic compounds	Lipids and lipid-like molecules	Glycerolipids	Triradylcglycerols	TG	257735	261923	482370	220135	807704	1023377	277090	321895	319679	1204609	508112	807086	503759	1886789	587516	947942	319094	994852	655566	3469337	11922240	12656753	12157063	11757947	15384569
328	5.46_274.14	274.145	5.457	[M+H]+	MSI 2	polyphenols	Piperlonguminine	WHAAPCGHVWVUEX-GGWOSOGESA-N	273.328	C16H19NO3	CC(C)CNC(=O)/C=C/C=C/C1=CC2=C(C=C1)OCO2	5320621	HMDB0030187							Organic compounds	Organoheterocyclic compounds	Benzodioxoles		Benzodioxoles	578358	991355	747939	465862	772523	763790	810308	936998	404417	748517	1011931	1188041	951307	1242065	1261198	1117524	826515	1037465	998597	834069	38792	31342	129376	24702	49561
329	10.50_910.82	910.822	10.502	[M+NH4]+	MSI 2	lipidomics	TG O-56:6|TG O-20:0_18:3_18:3	ITCTVQLYCHWFAK-UHFFFAOYSA-N												Organic compounds	Lipids and lipid-like molecules	Glycerolipids	Triradylcglycerols	TG	315812	276698	331818	396596	159742	337606	111173	276781	137668	366782	629349	597090	511844	757341	580352	532502	506084	638415	545974	584434					22548
330	1.11_315.23	315.232	1.113	[M+H-CH8O3]+	MSI 2	biogenic amines	11.beta.-Misoprostol	OJLOPKGSLYJEMD-XRULAAHKSA-N	382.535	C22H38O5	CCCCC(C)(C/C=C/[C@H]1[C@H](CC(=O)[C@@H]1CCCCCCC(=O)OC)O)O	72941572								Organic compounds	Lipids and lipid-like molecules	Fatty Acyls	Eicosanoids	Prostaglandins and related compounds	33079			5362	17956		9211	3264	6819		30993	39982	28491	37815	28243	58109	36361	28668	23819	7190	335983	272138	263201	287901	482264
331	2.94_310.17	310.165	2.94	[Cat]+	MSI 2	biogenic amines	Sinapine cation	HUJXHFRXWWGYQH-UHFFFAOYSA-O	310.366	C16H24NO5	C[N+](C)(C)CCOC(=O)C=CC1=CC(=C(C(=C1)OC)O)OC	5280385	HMDB0029379	C00933				CHEBI:16353	O-SINAPOYLCHOLINE	Organic compounds	Phenylpropanoids and polyketides	Cinnamic acids and derivatives	Hydroxycinnamic acids and derivatives	Coumaric acids and derivatives	26277	40319	23106	16885	20244	23653	24942	13742	24495	20267	50172	57826	51323	67232	72257	45052	58363	51708	35503	31134	534843	441697	504779	509277	661527
332	5.93_291.27	291.269	5.93	[M+H]+	MSI 2	polyphenols	Geranyllinalool	IQDXAJNQKSIPGB-HQSZAHFGSA-N	290.484	C20H34O	CC(=CCC/C(=C/CC/C(=C/CCC(C)(C=C)O)/C)/C)C	5365872		C20681				CHEBI:74299	CPD-8848	Organic compounds	Lipids and lipid-like molecules	Prenol lipids	Diterpenoids	Acyclic diterpenoids	2764351	5211238	5130975	2489996	3222023	5034026	3029194	5413102	2715908	2996191	6073868	6790784	4282139	6929306	7111662	7534107	5199762	6986492	5958863	5086050	101561	85368	115148	74042	112542
333	10.57_716.63	716.634	10.575	[M+NH4]+	MSI 2	lipidomics	CE 22:5	XOLZNHXNFMEUGA-DCDLNIKOSA-N	699.144	C49H78O2	CC/C=C\C/C=C\C/C=C\C/C=C\C/C=C\CCCCCC(=O)O[C@H]1CC[C@@]2([C@H]3CC[C@]4([C@H]([C@@H]3CC=C2C1)CC[C@@H]4[C@H](C)CCCC(C)C)C)C	42608400	HMDB0062457		LMST01020031			CHEBI:73910		Organic compounds	Lipids and lipid-like molecules	Sterol lipids	Steroid esters	Cholesteryl esters				15604							35840	28034	28782		38215	30186	32099	33319	30459	21180	712802	1155892	752877	650062	632959
334	5.87_757.62	757.616	5.867	[2M+K]+	MSI 3	lipidomics	SM d38:2	MDRFMTLYKHBJTF-NQYLGBTJSA-N	757.12	C43H85N2O6P	CCCCCCCCCCCCC/C=C/[C@H]([C@H](COP(=O)([O-])OCC[N+](C)(C)C)NC(=O)CCCCCCCCC/C=C\CCCCCCCC)O	52931179			LMSP03010059					Organic compounds	Lipids and lipid-like molecules	Sphingolipids	Phosphosphingolipids	SM	373488	512365	493487	343979	581030	447888	357322	496806	454580	449138	746689	663154	844236	561606	588860	775486	569259	642139	905407	872889	6471	9640	17531	21698	26643
335	5.37_289.25	289.253	5.367	[M+H-H2O]+	MSI 2	polyphenols	Ent-15-Hydroxy-8(17)-labden-2-one	GTIFKCGLBKITLG-UHFFFAOYSA-N	306.484	C20H34O2	CC(CCC1C(=C)CCC2C1(CC(=O)CC2(C)C)C)CCO	60208835								Organic compounds	Lipids and lipid-like molecules	Prenol lipids	Diterpenoids	Diterpenoids	213876	279260	333683	159670	268607	449781	142447	378530	155919	256046	691937	817538	489116	626968	679119	616293	667113	710565	584872	476969	6875	7703	4335	5864	21201
336	4.61_256.13	256.133	4.607	[M+H]+	MSI 2	biogenic amines	N-Benzoyl-L-phenylalaninol	RFYNAVYPYXLVOM-UHFFFAOYSA-N	255.312	C16H17NO2	C1=CC=C(C=C1)CC(CO)NC(=O)C2=CC=CC=C2	100005								Organic compounds	Benzenoids	Benzene and substituted derivatives	Phenethylamines	Amphetamines and derivatives	1599782	1717060	1317492	1324141	1444290	1478352	2039246	1423843	1516776	1444102	2949729	3692961	4147882	3757367	3589118	3488067	3827689	3525167	2617855	3550113	88450	100900	109067	99869	121068
337	2.72_138.02	138.019	2.719	[M-H]-	MSI 2	biogenic amines	4-Hydroxynicotinic acid	CHCUBGPSZDGABM-UHFFFAOYSA-N	139.109	C6H5NO3	C1=CNC=C(C1=O)C(=O)O	69113								Organic compounds	Organoheterocyclic compounds	Pyridines and derivatives	Pyridinecarboxylic acids and derivatives	Pyridinecarboxylic acids	109128	87809	79598	85572	75211	108576	100679	69243	60940	64156	148858	149340	146364	125606	185176	193197	189892	186733	137939	217478	1443843	968497	1458760	1523786	1620053
338	3.71_589.48	589.481	3.712	[M+Na]+	MSI 2	lipidomics	DG 32:1	OGUHKUNADZDIPN-UHFFFAOYSA-N												Organic compounds	Lipids and lipid-like molecules	Glycerolipids	Diradylglycerols	DG	126802	105999	92348	64698	102988	97103	106677	110018	97729	120429	42287	43156	43725	10233	47875	52202	55721	52598	52572	75196	2881912	2002550	1963158	2849682	2276731
339	10.83_938.82	938.816	10.833	[M+NH4]+	MSI 2	lipidomics	TG 57:6|TG 21:0_18:3_18:3	JLCYMZHLCFPHIE-UHFFFAOYSA-N												Organic compounds	Lipids and lipid-like molecules	Glycerolipids	Triradylcglycerols	TG	383844	490656	1361828	419705	1412784	719461	2950234	1269702	1080583	460033	10044	8631	657208	112882	25979	21136	177648	17381	121547	137707	89536		721214	15426	22419
340	2.66_331.26	331.264	2.663	[M-H]-	MSI 2	lipidomics	Docosatetraenoic acid	FPRKGXIOSIUDSE-UHFFFAOYSA-N	332.521	C22H36O2	CCCCCCCCCCCCCC=CC=CC=CC=CC(=O)O	187287								Organic compounds	Lipids and lipid-like molecules	Fatty Acyls	Fatty acids and conjugates	Very long-chain fatty acids	1901422	2004840	2069151	1931154	2045536	1839077	1892421	2366912	1619614	1906667	4347400	3798588	4961777	5036181	3674320	3667697	4215549	3637129	3514179	4384001	48328574	60450065	44325933	50482605	42849694
341	7.05_349.18	349.176	7.051	[M+NH4]+	MSI 1	biogenic amines	Enalaprilat	LZFZMUMEGBBDTC-QEJZJMRPSA-N	348.394	C18H24N2O5	C[C@@H](C(=O)N1CCC[C@H]1C(=O)O)N[C@@H](CCC2=CC=CC=C2)C(=O)O	5462501	HMDB0041886	C11720				CHEBI:4786		Organic compounds	Organic acids and derivatives	Carboxylic acids and derivatives	Amino acids, peptides, and analogues	Peptides	188417	179765	155120	146899	153864	152854	252327	182738	160328	166005	277520	265327	268451	326732	219576	275457	343267	284963	219327	308547	9759	9886	18560	12085	11676
342	1.94_181.10	181.097	1.941	[M+H]+	MSI 2	biogenic amines	1-(4-Ethoxyphenyl)urea	GGLIEWRLXDLBBF-UHFFFAOYSA-N	180.204	C9H12N2O2	CCOC1=CC=C(C=C1)NC(=O)N	9013	HMDB0032565	C19415			20580	CHEBI:82462		Organic compounds	Benzenoids	Benzene and substituted derivatives	N-phenylureas	N-phenylureas	53176	73520	60211	31184	54170	41283	65744	79280		83762	30690	66662	86431	35944	69152	50590	30219	101921	47534	33245	1027152	783506	1103032	978398	1206364
343	0.97_301.25	301.253	0.972	[M+H-C2H6FN]+	MSI 2	biogenic amines	(.+/-.)-2-Methylarachidonoyl-2'-fluoroethylamide	HMMNZALKMVCHHZ-ZKWNWVNESA-N	363.553	C23H38FNO	CCCCC/C=C\C/C=C\C/C=C\C/C=C\CCC(C)C(=O)NCCF	5283437			LMFA08020056					Organic compounds	Lipids and lipid-like molecules	Fatty Acyls	Fatty amides	N-acyl amines	1785747	228350	178658	39545	1208491	18871	134205	93373	74594	33572	252435	179529	220551	304770	167718	351050	8780720	427914	459667	180941	6762125	4659188	1231652	2596642	6128050
344	5.04_507.44	507.442	5.04	[M-H]-	MSI 2	lipidomics	AAHFA 32:1;O|AAHFA 16:1/16:0;O	ZYPMENLAQLKNJZ-UHFFFAOYSA-N												Organic compounds	Lipids and lipid-like molecules	Fatty Acyls	Fatty acids and conjugates	Very long-chain fatty acids	16846	14307	21256	23852	13911	11703	5630	27911	10032	12006	57130	83231	73488	68338	76868	66252	59278	84712	82279	105812	579893	732417	603653	526908	572889
345	3.23_314.14	314.14	3.231	[M+H]+	MSI 2	polyphenols	Moupinamide	NPNNKDMSXVRADT-WEVVVXLNSA-N	313.348	C18H19NO4	COC1=C(C=CC(=C1)/C=C/C(=O)NCCC2=CC=C(C=C2)O)O	5280537	HMDB0029365	C02717				CHEBI:17818	CPD-440	Organic compounds	Benzenoids	Phenols	Methoxyphenols	Methoxyphenols	160595	289969	219740	224505	256051	292340	136519	384263	118619	436147	356865	290385	332805	367765	386692	285835	283794	302786	286302	332953	5817	8990	10678	8373
346	11.50_980.86_11.51_985.82	980.8649_985.8204	11.5_11.505	[M+NH4]+_[M+Na]+	MSI 1	lipidomics	TG 60:6|TG 24:0_18:3_18:3	NVDYXXAEDSIYNY-UHFFFAOYSA-N												Organic compounds	Lipids and lipid-like molecules	Glycerolipids	Triradylcglycerols	TG	796756	976132	1492625	594644	2166391	1176036	2518398	1411031	1177621	867648	76568	64417	812177	280744	62268	132093	322458	60366	114752	213042	216114	15825	929340	51294	99348
347	3.23_274.16	274.156	3.235	[M+H]+	MSI 2	polyphenols	6-Methoxy-2-[(4-methyl-1-piperazinyl)carbonyl]-1H-indole	VZSXALSSTLGZGH-UHFFFAOYSA-N	273.331	C15H19N3O2	CN1CCN(CC1)C(=O)C2=CC3=C(N2)C=C(C=C3)OC	4905344								Organic compounds	Organoheterocyclic compounds	Indoles and derivatives	Indolecarboxylic acids and derivatives	Indolecarboxamides and derivatives	370831	325953	395890	215092	348965	495383	174748	502494	271732	313936	567706	727497	442425	520566	627432	558501	595178	640437	577862	461890	27639	26998		24506	8644
348	5.99_323.26	323.256	5.991	[M+H-H2O]+	MSI 2	polyphenols	PGE1 alcohol	CMHCOGHTKXUQKW-KOAZGICHSA-N	340.498	C20H36O4	CCCCC[C@@H](/C=C/[C@H]1[C@@H](CC(=O)[C@@H]1CCCCCCCO)O)O	5283054			LMFA03010053					Organic compounds	Lipids and lipid-like molecules	Fatty Acyls	Fatty alcohols	Fatty alcohols	1630446	3878493	3459148	2590034	2674280	3994439	4657194	3621442	2746763	8518593	2470927	2553874	2269505	3175230	3190861	3689024	3115866	3119452	2498593	1539979	34043024	49582286	94371296	55643762	57245003
349	8.68_812.68	812.677	8.676	[M+NH4]+	MSI 2	lipidomics	TG 48:6|TG 12:0_18:3_18:3	DZHLEKGVGUFESU-UHFFFAOYSA-N												Organic compounds	Lipids and lipid-like molecules	Glycerolipids	Triradylcglycerols	TG	12677	4625	42688		64746	25530	88082	33449	7264	9012			3369								322543	315632	660567	339162	588662
350	6.10_765.55	765.549	6.098	[M+Na]+	MSI 2	lipidomics	DG 46:11	GYJXVFWJPFMIHS-UHFFFAOYSA-N												Organic compounds	Lipids and lipid-like molecules	Glycerolipids	Diradylglycerols	DG	633108	893651	638468	608975	763185	560424	729211	635147	847280	626802	299402	237670	377608	263254	310904	251375	505073	341018	293409	511995	123826	19430	107869	121796	179163
351	9.44_875.75_9.43_870.79	875.7465_870.7926	9.436_9.431	[M+Na]+_[M+H]+	MSI 2	lipidomics	TG O-53:5|TG O-17:3_18:1_18:1	QVBDPTUVGKWECZ-UHFFFAOYSA-N												Organic compounds	Lipids and lipid-like molecules	Glycerolipids	Triradylcglycerols	TG	6874	36136	24067	8463	14446	29674	5976	16732	22429	80953	10345	26692	30135		21578	5051	13038	25733	16640	18320	361025	275436	319294	303227	306019
352	1.62_267.19	267.194	1.617	[M-H]-	MSI 2	lipidomics	FA 16:2;O	UHMGSJDYHGEEEY-UHFFFAOYSA-N												Organic compounds	Lipids and lipid-like molecules	Fatty Acyls	Fatty acids and conjugates	Fatty acids	31489	10892		9699	17213				15151	13382	44649	64030	72987	46656	46187	42330	33280	38173	39255	110162	547040	606145	520143	584584	579308
353	10.22_393.06_10.22_388.11	393.0642_388.1088	10.222_10.22	[M+Na]+_[M+NH4]+	MSI 2	biogenic amines	Digalacturonic acid	IGSYEZFZPOZFNC-LKIWRGPLSA-N	370.264	C12H18O13	[C@@H]1([C@H]([C@H](O[C@@H]([C@@H]1O)O[C@@H]2[C@@H]([C@H](C(O[C@@H]2C(=O)O)O)O)O)C(=O)O)O)O	439694		C02273						Organic compounds	Organic oxygen compounds	Organooxygen compounds	Carbohydrates and carbohydrate conjugates	Sugar acids and derivatives	51452	62313	29027	30938	21081	51535	46630	38677	38399	37876	32194	32684	70879	39556	43474	34695	27893	43308	16731	47491	969795	659155	836634	696722	1036434
354	6.58_280.13	280.129	6.577	[M+H]+	MSI 2	biogenic amines	Gly-Gly-Phe	KAJAOGBVWCYGHZ-JTQLQIEISA-N	279.292	C13H17N3O4	C1=CC=C(C=C1)C[C@@H](C(=O)[O-])NC(=O)CNC(=O)C[NH3+]	6993372						CHEBI:73905		Organic compounds	Organic acids and derivatives	Carboxylic acids and derivatives	Amino acids, peptides, and analogues	Peptides	2577201	2808421	2262844	2422563	2294207	2454626	3008581	2562550	2532419	2468780	5462141	5615648	6454419	5931127	5066903	6014831	6266200	5828227	5059461	5218404	188078	142816	160892	159009	236247
355	6.59_255.21	255.211	6.588	[M+H-C20H38O13]+	MSI 2	polyphenols	Timosaponin A-III	MMTWXUQMLQGAPC-HRSJJQGESA-N	740.919	C39H64O13	C[C@H]1[C@H]2[C@H](C[C@@H]3[C@@]2(CC[C@H]4[C@H]3CC[C@H]5[C@@]4(CC[C@@H](C5)O[C@H]6[C@@H]([C@H]([C@H]([C@H](O6)CO)O)O)O[C@H]7[C@@H]([C@H]([C@@H]([C@H](O7)CO)O)O)O)C)C)O[C@]18CCC(CO8)C	71306914								Organic compounds	Lipids and lipid-like molecules	Sterol lipids	Steroidal glycosides	Steroidal saponins	16443	24122	23755	12187	18062	63498	13208	50923	13148	93982	18467	16313	6905	26431	21490	30584	31503	68163	79825	40003	268553	373408	335654	517889	439399
356	5.53_571.28	571.282	5.531	[2M+H]+	MSI 2	polyphenols	Galanthaminone	QENVUHCAYXAROT-YOEHRIQHSA-N	285.338	C17H19NO3	CN1CC[C@@]23C=CC(=O)C[C@@H]2OC4=C(C=CC(=C34)C1)OC	10356588		C08534				CHEBI:7487		Organic compounds	Alkaloids and derivatives	Amaryllidaceae alkaloids	Galanthamine-type amaryllidaceae alkaloids	Galanthamine-type amaryllidaceae alkaloids	3196375	5371213	3350465	3561447	4930639	2175164	3071081	3819938	895689	5049443	3489528	2810448	2432347	5091690	3638630	3136792	1957987	2742338	3000706	2574807	66798	60527	1190754	55040	117577
357	8.62_261.11	261.108	8.619	[M+H-C4H8O2]+	MSI 2	biogenic amines	Tagitinin C	DUQSSEQKLJQACA-FESGBCJUSA-N	348.391	C19H24O6	C/C/1=C/[C@@H]2[C@@H]([C@@H](C[C@@](/C=C/C1=O)(C)O)OC(=O)C(C)C)C(=C)C(=O)O2	11256548								Organic compounds	Lipids and lipid-like molecules	Prenol lipids	Terpene lactones	Sesquiterpene lactones	15319	32374	13595	15783	14085	29724	40455	15419	18716	25224	54824	66231	51474	38475	52215	67103	45378	57334	62020	54112	664783	400216	462553	483245	579089
358	11.15_940.83_11.15_945.79	940.8330_945.7882	11.148_11.146	[M+NH4]+_[M+Na]+	MSI 2	lipidomics	TG 57:5|TG 21:0_18:2_18:3	DHFOHZBRWBRJPB-UHFFFAOYSA-N												Organic compounds	Lipids and lipid-like molecules	Glycerolipids	Triradylcglycerols	TG	332041	338506	940038	334501	1153231	916346	1292249	946351	914625	343226	11522	26439	355651	32969	10232	4854	92515	9776	58986	119315	110199	13027	346734	26701	5896
359	6.77_296.15	296.15	6.772	[M+H]+	MSI 2	biogenic amines	6-(2,3-Dihydroxy-3-methylbutoxy)-4-methoxy-5-methyl-2,3-dihydroisoindol-1-one	FWZSWYCCQVYQJG-UHFFFAOYSA-N	295.142	C15H21NO5	CC1=C(C=C2C(=C1OC)CNC2=O)OCC(C(C)(C)O)O	102571602								Organic compounds	Organoheterocyclic compounds	Isoindoles and derivatives	Isoindoles	Isoindoles	41822	52377	15891	23045	31083	46531	44958	33500	34199	50085	133667	95850	97451	138273	117664	158903	123411	100183	97396	81962	927081	605540	826404	865945	1118877
360	0.61_287.22	287.223	0.613	[M-H]-	MSI 2	lipidomics	FA 16:0;2O	BOVBNBWBCCWHEP-UHFFFAOYSA-N	288.423	C16H32O4	C(CCCCO)CCCC(CCCCCCC(=O)O)O	15847409								Organic compounds	Lipids and lipid-like molecules	Fatty Acyls	Fatty acids and conjugates	Long-chain fatty acids	309963	270652	229478	299613	252056	272018	231355	321735	208267	254104	846423	1081748	903440	921349	818037	800083	724215	829804	713537	670008	1497	17650	7025	10168	11189
361	1.77_309.24	309.243	1.767	[M-H]-	MSI 2	lipidomics	FA 19:2;O	JDZYMXZMBFIQFY-UHFFFAOYSA-N												Organic compounds	Lipids and lipid-like molecules	Fatty Acyls	Fatty acids and conjugates	Fatty acids	13086	35778	16164	31043	14298	14312	14695	17677	11283	23256	89287	119104	144738	124177	125629	63592	147969	88742	89652	140536	388486	418854	377448	368261	347580
362	3.63_313.11	313.108	3.626	[M+H]+	MSI 2	polyphenols	Maturinacetat	OMGQCYHSAPWXMS-UHFFFAOYSA-N	312.317	C18H16O5	CC1=C2C(=CC=C1)C(=C3C(=C2C=O)C(=CO3)COC(=O)C)OC	23757119								Organic compounds	Lipids and lipid-like molecules	Prenol lipids	Sesquiterpenoids	Eremophilane, 8,9-secoeremophilane and furoeremophilane sesquiterpenoids	17037	15642	17544	13593	13381	24025	3085	23015	10213	13659	12076	28482	8947	16848	17917	24265	17798	26434	27902	25811	222586	280818	197759	272679	292273
363	6.51_258.11	258.109	6.511	[M+H]+	MSI 1	biogenic amines	5-Methylcytidine	ZAYHVCMSTBRABG-JXOAFFINSA-N	257.244	C10H15N3O5	CC1=CN(C(=O)N=C1N)[C@H]2[C@@H]([C@@H]([C@H](O2)CO)O)O	92918	HMDB0000982							Organic compounds	Nucleosides, nucleotides, and analogues	Pyrimidine nucleosides		Pyrimidine nucleosides	27820	32071	16790	18170	12660	19104	27011	25027	15536	10688	92132	104353	111938	111008	65834	89418	90022	91173	94976	76108	802452	632022	676805	684290	803132
364	4.24_380.20	380.201	4.238	[M+H]+	MSI 3	polyphenols	5-hydroxy-7-[2-(2-hydroxy-5-oxo-2H-furan-3-yl)ethyl]-7,8-dimethyl-5,6,6a,8,9,10-hexahydro-1H-benzo[d][2]benzofuran-3-one	FSXIRVCJYLNVMM-UHFFFAOYSA-N	362.418	C20H26O6	CC1CCC23COC(=O)C2=CC(CC3C1(C)CCC4=CC(=O)OC4O)O	57509448								Organic compounds	Lipids and lipid-like molecules	Prenol lipids	Terpene lactones	Diterpene lactones	5750					714	24237	4496					5981		4625	4679					63763	95922	31813	63817	58278
365	0.64_333.21	333.215	0.64	[M+H]+	MSI 2	polyphenols	Ser-Val-Lys	LGIMRDKGABDMBN-DCAQKATOSA-N	332.206	C14H28N4O5	CC(C)[C@@H](C(=O)N[C@@H](CCCCN)C(=O)O)NC(=O)[C@H](CO)N	145457936								Organic compounds	Organic acids and derivatives	Carboxylic acids and derivatives	Amino acids, peptides, and analogues	Peptides		4025			5634	16124		9439		5381		8727			12018	15835	6087	18376	14103	8720	168720	193145	50829	196009	149361
366	5.08_725.51	725.513	5.081	[M+Na]+	MSI 2	lipidomics	SM 35:5;O3	BYPJMLAWXBCWDJ-UHFFFAOYSA-N												Organic compounds	Lipids and lipid-like molecules	Sphingolipids	Phosphosphingolipids	SM	9043	18187	28166	30752		11624	13581	21068	50804	17675	50619	1605	22867	30814	15402	26329	36307	32737	26959	39219	319664	341652	381622	331346	321273
367	2.18_464.37	464.374	2.181	[M+H]+	MSI 2	lipidomics	CAR 21:3	ZPOWZIAUGKOQTA-UHFFFAOYSA-N												Organic compounds	Lipids and lipid-like molecules	Fatty Acyls	Fatty esters	Fatty acyl carnitines		10532	3832	5607	4437	5251		6568	5309	7100	7845	10838	39915		5202	24424	27779	4582	1708	15052	55907	18601	57974	70650	67514
368	6.09_622.54_6.09_562.52	622.5419_562.5206	6.088_6.087	[M+CH3COO]-_[M-H]-	MSI 2	lipidomics	Cer 36:2;O2|Cer 18:1;O2/18:1	OBFSLMQLPNKVRW-UHFFFAOYSA-N	563.939	C36H69NO3	CCCCCCCCCCCCCC=CC(C(CO)NC(=O)CCCCCCCC=CCCCCCCCC)O	54141208								Organic compounds	Organic oxygen compounds	Organooxygen compounds	Alcohols and polyols	Secondary alcohols	79342	98074	138646	130977	102877	134537	101541	125532	109280	100144	123810	189914	179139	169253	199550	195511	209134	145962	165693	192724	1963487	1891761	1920673	1788474	1969089
369	3.23_340.32	340.321	3.233	[M+H]+	MSI 2	lipidomics	NAE 19:1	DZYRQNALEUIRMW-UHFFFAOYSA-N												Organic compounds	Lipids and lipid-like molecules	Fatty Acyls	Fatty acids and conjugates	NAE	303274	449410	330346	302069	390516	417831	362635	274840	405762	303547	765837	819576	1049416	898999	960930	1112755	980414	893388	990045	1191142	7530		14892	4946	20863
370	4.94_272.13	272.128	4.939	[M+H]+	MSI 3	biogenic amines	2'-O-Methyl-5-methylcytidine	CNVRVGAACYEOQI-FDDDBJFASA-N	271.27	C11H17N3O5	CC1=CN(C(=O)N=C1N)[C@H]2[C@@H]([C@@H]([C@H](O2)CO)O)OC	18660583								Organic compounds	Nucleosides, nucleotides, and analogues	Pyrimidine nucleosides		Pyrimidine nucleosides	240885	263659	194171	158352	193337	225632	328786	210333	197784	231797	513271	474129	601065	525853	434900	500342	466178	474271	403911	410102	21012			23256	27519
371	1.10_148.08	148.079	1.102	[M+H]+	MSI 3	biogenic amines	Indole-3-carbinol	IVYPNXXAYMYVSP-UHFFFAOYSA-N	147.174	C9H9NO	C1=CC=C2C(=C1)C(=CN2)CO	3712	HMDB0005785				31447	CHEBI:24814	CPDQT-428	Organic compounds	Organoheterocyclic compounds	Indoles and derivatives	Indoles	3-alkylindoles	75843	95820	51537	47190	57466	59152	114411	81481	78045	106113	293619	223349	294646	276200	272743	281505	275230	211432	237924	193162	6465	9301	10723		17329
372	5.10_862.63_5.10_884.61	862.6259_884.6074	5.098_5.096	[M+H]+_[M+Na]+	MSI 3	lipidomics	Gal-Gal-Cer d18:1/16:0	HLIJNIKSBCIDGO-RAPWJMMSSA-N	862.184	C46H87NO13	CCCCCCCCCCCCCCCC(=O)N[C@@H](CO[C@H]1C([C@H]([C@H](C(O1)CO)O[C@H]2C([C@H]([C@H](C(O2)CO)O)O)O)O)O)[C@@H](/C=C/CCCCCCCCCCCCC)O	44261956								Organic compounds	Lipids and lipid-like molecules	Sphingolipids	Glycosphingolipids	Neutral glycosphingolipids	14790	39306		14867	8741	41761	19031	12337		6459	61559	102588	145600	16492	103797	76433	111700	98818	102893	205047	658557	350107	582832	609821	619568
373	4.12_602.22	602.224	4.115	[M+NH4]+	MSI 1	polyphenols	(1R,2R,5S,8R,14R,15R,16S)-16-hydroxy-1,2,14,17,17-pentamethyl-8-(prop-1-en-2-yl)pentacyclo[11.7.0.0²,¹⁰.0⁵,⁹.0¹⁴,¹⁸]icosane-5,15-dicarboxylic acid	WLCHQSHZHFLMJH-GAVPBTRYSA-N	486.684	C30H46O5	CC(=C)[C@@H]1CC[C@]2(C1C3CCC4[C@]([C@@]3(CC2)C)(CCC5[C@@]4([C@H]([C@@H](C5(C)C)O)C(=O)O)C)C)C(=O)O	10096940								Organic compounds	Lipids and lipid-like molecules	Prenol lipids	Triterpenoids	Triterpenoids	4860	4403	6564		11234	11831		17073	2956		31727	32794	15590	17561	21306	17240	26268	28341	16971	9604	199984	265466	149969	245372	224381
374	5.35_609.49	609.489	5.352	[M-H]-	MSI 2	lipidomics	FAHFA 40:6;O|FAHFA 22:6/18:0;O	XOAVRDYBDXXNJH-UHFFFAOYSA-N												Organic compounds	Lipids and lipid-like molecules	Fatty Acyls	Fatty acids and conjugates	Long-chain fatty acids	24816	45191	27924	43644	42388	38825	46049	39676	39989	27288	86610	73822	42090	74328	76387	90542	67484	80944	76152	102628	486421	603118	385484	404563	492583
375	11.27_1319.23_11.28_668.63	1319.2317_668.6344	11.273_11.28	[2M+NH4]+_[M+NH4]+	MSI 1	lipidomics	CE 18:1	RJECHNNFRHZQKU-RMUVNZEASA-N	651.101	C45H78O2	CCCCCCCC/C=C\CCCCCCCC(=O)O[C@H]1CC[C@@]2([C@H]3CC[C@]4([C@H]([C@@H]3CC=C2C1)CC[C@@H]4[C@H](C)CCCC(C)C)C)C	5283632	HMDB0000918	C14641	LMST01020003				CPD-15951	Organic compounds	Lipids and lipid-like molecules	Sterol lipids	Steroid esters	Cholesteryl esters	511419	453487	537612	452660	425830	453066	491448	446400	350272	501299	707881	685015	712822	763623	741012	641466	727996	712791	763765	747290	10527839	17950615	10028443	12393673	12218278
376	0.65_328.32	328.321	0.646	[M+H]+	MSI 2	lipidomics	Stearoyl-EA	OTGQIQQTPXJQRG-UHFFFAOYSA-N	327.546	C20H41NO2	CCCCCCCCCCCCCCCCCC(=O)NCCO	27902	HMDB0013078		LMFA08040051			CHEBI:85299		Organic compounds	Organic nitrogen compounds	Organonitrogen compounds	Amines	Alkanolamines	34863	31682	57439	51953	31555	23940	47099	37010	11035	37673	43985	53303	85228	29252	57853	60042	71916	36880	76095	57768	747903	834714	795941	836017	742410
377	8.66_841.67	841.667	8.656	[M+Na]+	MSI 2	lipidomics	DG 51:8	PIKATRARSGJDNU-UHFFFAOYSA-N												Organic compounds	Lipids and lipid-like molecules	Glycerolipids	Diradylglycerols	DG						4206															137797	159329	91320	135420	145009
378	4.54_580.53_4.54_562.52	580.5299_562.5197	4.544_4.544	[M+H]+_[M+H-H2O]+	MSI 2	lipidomics	Cer 36:2;O3|Cer 18:1;O2/18:1;O	OGMXRWJJGUINGB-UHFFFAOYSA-N												Organic compounds	Lipids and lipid-like molecules	Sphingolipids	Ceramides	Long-chain ceramides	32372	63168	48992	64119	48532	41747	59792	51620	28004	25384	182412	109196	207064	52940	129132	172296	161602	179247	175131	221135	801782	281944	793048	516614	478856
379	4.87_329.19	329.186	4.865	[M+H]+	MSI 2	biogenic amines	Labetalol	SGUAFYQXFOLMHL-UHFFFAOYSA-N	328.406	C19H24N2O3	CC(CCC1=CC=CC=C1)NCC(C2=CC(=C(C=C2)O)C(=O)N)O	3869	HMDB0014736	C07063		DB00598	23191	CHEBI:6343		Organic compounds	Benzenoids	Benzene and substituted derivatives	Benzoic acids and derivatives	Hydroxybenzoic acid derivatives	307536	293622	235793	252039	233050	273782	325841	250681	331328	234734	626999	649601	724333	692893	605401	628942	637495	612058	583080	598985	16201	17489	29981	22546	25513
380	8.96_131.13	131.129	8.964	[M+NH4]+	MSI 1	biogenic amines	Agmatine	QYPPJABKJHAVHS-UHFFFAOYSA-N	130.192	C5H14N4	C(CCN=C(N)N)CN	199	HMDB0001432	C00179		DB08838	49406	CHEBI:17431		Organic compounds	Organic nitrogen compounds	Organonitrogen compounds	Guanidines	Guanidines	26093	24145	21953	33147	23410	36709	44105	26383	33382	28561	100831	97090	129278	119726	103793	108321	116849	82510	82524	143182	910436	673317	712003	772904	871322
381	4.80_878.60	878.604	4.796	[M-H]-	MSI 2	lipidomics	SHexCer 40:1;O3	MRHOAGVMNHYIOP-UHFFFAOYSA-N												Organic compounds	Lipids and lipid-like molecules	Sphingolipids	Glycosphingolipids	SHexCer	7548	15770	12998	15736	8978	18601	10112	18081	13515	21178	74844	725	81217	6905	65193	64074	102207	85746	74023	115079	196626	262218	195128	190689	238246
382	4.50_470.46	470.456	4.498	[M+H]+	MSI 2	lipidomics	Cer 29:0;O2|Cer 17:0;O2/12:0	ZNLJAMADCLIGIV-UHFFFAOYSA-N	469.449	C29H59NO3	CCCCCCCCCCCCCCC(C(CO)NC(=O)CCCCCCCCCCC)O	132994404								Organic compounds	Lipids and lipid-like molecules	Sphingolipids	Ceramides	Ceramides		4699			3720	3842			10819	4314	8384	11944	11956		13610	16615	12568	12148	18120	13455	123727	72168	153787	114515	148879
383	9.94_792.71_9.94_797.66	792.7079_797.6632	9.939_9.938	[M+NH4]+_[M+Na]+	MSI 1	lipidomics	TG 46:2|TG 12:0_16:0_18:2	JORMHQSOEAESEA-UHFFFAOYSA-N												Organic compounds	Lipids and lipid-like molecules	Glycerolipids	Triradylcglycerols	TG	314962	236355	373284	251615	323369	237889	321241	266522	415915	280191	162390	100815	141617	535574	129703	199417	185213	132213	133495	153683	6691407	8478904	9513876	8576030	8043215
384	2.43_273.08	273.077	2.433	[M+H]+	MSI 3	polyphenols	7-methoxy-8-(3-methyl-5-oxo-2H-furan-4-yl)chromen-2-one	AZYVCLJYWIHOAD-UHFFFAOYSA-N	272.253	C15H12O5	CC1=C(C(=O)OC1)C2=C(C=CC3=C2OC(=O)C=C3)OC	5319827								Organic compounds	Phenylpropanoids and polyketides	Coumarins and derivatives		Coumarins and derivatives	67619	61593	89904	23698	66159	127190	31030	130313	33962	75047	102689	135304	41052	68004	106533	73640	76553	108718	75548	56294	2787	4160		4550	6200
385	1.00_333.21	333.207	0.996	[M-H]-	MSI 2	lipidomics	FA 20:5;2O	RWHZIKMTLJOOEH-UHFFFAOYSA-N	334.214	C20H30O4	CCC(C=CC=CC=CC(CC=CCC=CCCCC(=O)O)O)O	75229314								Organic compounds	Lipids and lipid-like molecules	Fatty Acyls	Eicosanoids	Hydroxyeicosapentaenoic acids	278977	242514	294016	278554	307780	266277	454619	310012	242504	272024	392732	452932	503825	708027	296669	321822	416825	372672	369753	455776		28658	33752	19827	14898
386	1.40_249.08	249.08	1.396	[M-H]-	MSI 2	biogenic amines	Citrinin	CBGDIJWINPWWJW-IYSWYEEDSA-N	250.248	C13H14O5	C[C@@H]1[C@H](OC=C2C1=C(C(=C(C2=O)C(=O)O)O)C)C	54680783								Organic compounds	Organoheterocyclic compounds	Benzopyrans		Benzopyrans	147077	157015	107710	126357	116417	148890	233544	128530	167252	159292	437068	472077	451133	475516	394425	443461	408631	421284	488956	428323	2710822	1656465	2825154	2966817	3725755
387	9.81_304.16	304.162	9.806	[M+H]+	MSI 2	biogenic amines	Glu-Arg	MPZWMIIOPAPAKE-BQBZGAKWSA-N	303.315	C11H21N5O5	C(C[C@@H](C(=O)O)NC(=O)[C@H](CCC(=O)O)N)CN=C(N)N	9796450	HMDB0028813							Organic compounds	Organic acids and derivatives	Carboxylic acids and derivatives	Amino acids, peptides, and analogues	Peptides			117448	120942	91185		194818	157956	145313	894603	212460	251442	260748	1292453		225992		235797				9626
388	4.78_516.43	516.426	4.783	[M+NH4]+	MSI 2	lipidomics	TG 26:0|TG 8:0_8:0_10:0	OXBFEJBBKCRANO-UHFFFAOYSA-N	498.737	C29H54O6	CCCCCCCCCC(=O)OCC(COC(=O)CCCCCCC)OC(=O)CCCCCCC	10278570								Organic compounds	Lipids and lipid-like molecules	Glycerolipids	Triradylcglycerols	TG	78402	53936	37814	101103	51007	63387	37827	71860	69557	66424	64628	80422	159826	204182	71014	69464	207776	66617	102171	238987	1768445	1730878	2052645	2040473	1656070
389	5.76_445.41	445.405	5.763	[M-H]-	MSI 2	lipidomics	Triacontatrienoic acid	IKYQCNWWMZAATD-XJYPXFOUSA-N	446.412	C30H54O2	CCCCCCCCCCCCCCCCCCCCCCC/C=C/C=C/C=C/C(=O)O	129725776								Organic compounds	Lipids and lipid-like molecules	Fatty Acyls	Fatty acids and conjugates	Very long-chain fatty acids	257158	427615	304874	637671	353909	422153	255456	389021	277547	324526	321207	410092	459638	508098	394863	413088	467321	317022	382280	515747	20757	20016	32917	12800	26936
390	1.24_255.07	255.066	1.242	[M-H]-	MSI 3	biogenic amines	Liquiritigenin	FURUXTVZLHCCNA-AWEZNQCLSA-N	256.254	C15H12O4	C1[C@H](OC2=C(C1=O)C=CC(=C2)O)C3=CC=C(C=C3)O	114829		C09762	LMPK12140061	DB03601		CHEBI:28777	CPD-3061	Organic compounds	Phenylpropanoids and polyketides	Flavonoids	Flavans	Flavanones	132305	123984	117378	136393	104263	89799	138428	82292	92602	90892	41222	93458	63911	85062	58005	74137	56659	68224	63180	10413	3131	8051		6878	10012
391	9.42_260.20	260.197	9.417	[M+H]+	MSI 2	biogenic amines	Lys-Ile	FMIIKPHLJKUXGE-GUBZILKMSA-N	259.346	C12H25N3O3	CC[C@H](C)[C@@H](C(=O)O)NC(=O)[C@H](CCCCN)N	7010499						CHEBI:74559		Organic compounds	Organic acids and derivatives	Carboxylic acids and derivatives	Amino acids, peptides, and analogues	Peptides	34492	28203	33302	17091	12789	6449	33825	4132	3562	24799	98507	85553	88803	84324	81194	88294	91798	79886	49758	97715	579658	482204	563145	516282	604864
392	5.12_562.48_5.11_598.46	562.4843_598.4615	5.116_5.114	[M-H]-_[M+Cl]-	MSI 2	lipidomics	Cer 35:3;O3|Cer 19:3;O2/16:0;(2OH)	ZZNWTDKTSKPHTP-UHFFFAOYSA-N												Organic compounds	Lipids and lipid-like molecules	Sphingolipids	Ceramides	Long-chain ceramides	50638	68387	34720	24674	46784	34068	35573	51624	24922	67967	289914	237886	265573	280549	233897	194134	267326	184204	204205	247433	1640086	1769511	1398118	1650788	1337345
393	3.56_847.61	847.607	3.56	[M+Na]+	MSI 2	lipidomics	DG 52:12	UAIQIOYEUQSCPK-UHFFFAOYSA-N												Organic compounds	Lipids and lipid-like molecules	Glycerolipids	Diradylglycerols	DG		10248	3540	10636	8350	8778		6266	5002	12918	52437	41952	60879		46251	64341	55672	37229	73170	61475	394926	237341	391714	342707	483317
394	9.59_225.10	225.099	9.594	[M-H]-	MSI 1	biogenic amines	Carnosine	CQOVPNPJLQNMDC-ZETCQYMHSA-N	226.233	C9H14N4O3	C1=C(NC=N1)C[C@@H](C(=O)O)NC(=O)CCN	439224	HMDB0000033	C00386				CHEBI:15727	CARNOSINE	Organic compounds	Organic acids and derivatives	Peptidomimetics	Hybrid peptides	Hybrid peptides	56502	33516	38703	33616	47609	36477	31282	29111	31873	29228	65928	45708	70941	76186	87269	68629	99699	68541	82472	98687	703669	532388	654006	593332	660681
395	8.89_361.16	361.159	8.892	[M+Na]+	MSI 2	biogenic amines	18-Carboxydinorleukotriene B4	XWRIIHRGMKHPHN-USRRKILKSA-N	338.396	C18H26O6	C(C[C@@H](/C=C\C=C\C=C\[C@@H](C/C=C\CCC(=O)O)O)O)CC(=O)O	6438938						CHEBI:63980		Organic compounds	Lipids and lipid-like molecules	Fatty Acyls	Fatty acids and conjugates	Long-chain fatty acids	488989	520635	556335	604186	480327	657589	545540	665647	748610	679432	556621	564523	569258	538956	545808	559644	513621	509352	588247	700230	44720	38964	31700	29010	56649
396	4.15_270.15	270.149	4.149	[M+H-H2O]+	MSI 2	biogenic amines	(+)-Ritodrine	IOVGROKTTNBUGK-SJKOYZFVSA-N	287.354	C17H21NO3	C[C@H]([C@H](C1=CC=C(C=C1)O)O)NCCC2=CC=C(C=C2)O	688570								Organic compounds	Benzenoids	Benzene and substituted derivatives	Phenethylamines	Phenethylamines	577213	596509	497834	519603	494958	600490	701934	506430	655951	512151	1317462	1387651	1560264	1486842	1332736	1446695	1600966	1422977	1061252	1439279	33675	27478	40780	9286	62558
397	7.49_646.61	646.614	7.488	[M+H-H2O]+	MSI 2	lipidomics	Cer 42:2;O3|Cer 18:1;O2/24:1;O	WLAOOCOLPLQZNK-UHFFFAOYSA-N												Organic compounds	Lipids and lipid-like molecules	Sphingolipids	Ceramides	Long-chain ceramides	23428	39107	27141	29136	61860	39823	36570	34994	52627	20026	51179	58187	101005	15071	81811	71608	87466	75630	103001	85897	579988	539595	564591	473742	527628
398	0.99_365.31	365.305	0.99	[M+H]+	MSI 2	biogenic amines	2-Arachidonyl glycerol ether	CUJUUWXZAQHCNC-DOFZRALJSA-N	364.563	C23H40O3	CCCCC/C=C\C/C=C\C/C=C\C/C=C\CCCCOC(CO)CO	6483057	HMDB0013657		LMGL01010029			CHEBI:75913		Organic compounds	Lipids and lipid-like molecules	Endocannabinoids		Endocannabinoids	267733	16947	39950		168657	4353	8337		19056		10161	5676		13788	4433	19425	1519355	28777	65345		261447	517102	105318	154965	460233
399	5.93_155.08	155.082	5.934	[M+H]+	MSI 2	biogenic amines	3-Propyl-1H-pyrazole-5-carboxylic acid	QYPSYPPSHXDFLV-UHFFFAOYSA-N	154.167	C7H10N2O2	CCCC1=CC(=NN1)C(=O)O	676464								Organic compounds	Organoheterocyclic compounds	Azoles	Pyrazoles	Pyrazole carboxylic acids and derivatives	5293789	6032505	4317613	4643728	4107153	4844039	7382314	4996731	5012198	5298310	12516735	12253190	13087837	11907911	11775744	11718703	11992270	11782191	10491074	11025109	119255511	85203378	112130053	106660112	130172276
400	9.80_920.77_9.79_937.81	920.7701_937.8060	9.801_9.788	[M+NH4]+_[M+H]+	MSI 2	lipidomics	TG 56:8|TG 20:2_18:3_18:3	XCSCYLBZWLBALD-UHFFFAOYSA-N												Organic compounds	Lipids and lipid-like molecules	Glycerolipids	Triradylcglycerols	TG	1735563	1727817	3331985	1037449	3858160	1540467	4496490	2550100	2308488	1591627	60013	54838	1481185	359552	80516	160664	302849	63104	167625	246728	522181	360058	1563960	114514	181779
401	1.81_283.18	283.175	1.811	[M+H]+	MSI 2	biogenic amines	Hexaethylene glycol	IIRDTKBZINWQAW-UHFFFAOYSA-N	282.331	C12H26O7	C(COCCOCCOCCOCCOCCO)O	17472	HMDB0061822					CHEBI:49793		Organic compounds	Organic oxygen compounds	Organooxygen compounds	Ethers	Dialkyl ethers	1139352	1229795	955912	1009991	985070	1144537	1284949	1122834	1401323	1093722	1618940	1553876	1732929	1643480	1908371	1493740	1478033	1862097	1992640	1170761	55016	38247	119742	83119	53959
402	3.62_348.15	348.145	3.624	[M+NH4]+	MSI 1	polyphenols	Evoxine	FGANMDNHTVJAHL-UHFFFAOYSA-N	347.363	C18H21NO6	CC(C)(C(COC1=C(C2=C(C=C1)C(=C3C=COC3=N2)OC)OC)O)O	73416		C10670				CHEBI:4952		Organic compounds	Organoheterocyclic compounds	Quinolines and derivatives	Furanoquinolines	Furanoquinolines	12802	11642	8504	4917	8371	10923		6714	3679	3250	9817	6559	14704	5948	10988	28554	24769	21979	12007	12782	110602	152723	119608	147906	151341
403	6.05_154.10	154.098	6.046	[M+H]+	MSI 1	biogenic amines	N-omega-Acetylhistamine	XJWPISBUKWZALE-UHFFFAOYSA-N	153.182	C7H11N3O	CC(=O)NCCC1=CN=CN1	69602	HMDB0013253	C05135		DB04622				Organic compounds	Organic acids and derivatives	Carboxylic acids and derivatives	Carboxylic acid derivatives	Carboxylic acid amides	722224	760719	556219	610378	604549	649239	873307	630647	599532	682095	1431904	1540212	1590921	1695991	1619056	1408381	1637429	1427027	1218765	1467475	13312717	10676543	13662864	12803198	15193866
404	5.56_762.61	762.609	5.56	[M+H]+	MSI 2	lipidomics	HexCer 36:0;4O|HexCer 18:0;3O/18:0;(2OH)	KADKZTJEIBBSCQ-UHFFFAOYSA-N	761.602	C42H83NO10	CCCCCCCCCCCCCCCCC(C(=O)NC(COC1C(C(C(C(O1)CO)O)O)O)C(C(CCCCCCCCCCCCCC)O)O)O	138191323								Organic compounds	Lipids and lipid-like molecules	Sphingolipids	Glycosphingolipids	HexCer		8789	17750		15923	7088	6769	8420			30525	31371	20543	17673	43375	25459	18289	33907	38534	17679	183266	73514	201228	200562	221148
405	9.51_854.72_9.51_859.68	854.7233_859.6785	9.507_9.508	[M+NH4]+_[M+Na]+	MSI 2	lipidomics	TG 51:6|TG 15:0_18:3_18:3	VEZSOMDLXDLDTA-UHFFFAOYSA-N												Organic compounds	Lipids and lipid-like molecules	Glycerolipids	Triradylcglycerols	TG	918622	964965	1388749	665833	1816125	921483	2158932	1199781	995689	1034426	64185	56213	735615	284891	49857	94545	174126	39080	61483	222904	170951	83537	521778	51794	117213
406	5.71_535.47	535.473	5.713	[M-H]-	MSI 2	lipidomics	AAHFA 34:1;O|AAHFA 16:1/18:0;O	JDWSDORFFWNJOI-UHFFFAOYSA-N												Organic compounds	Lipids and lipid-like molecules	Fatty Acyls	Fatty acids and conjugates	Very long-chain fatty acids	583838	721724	703297	803382	882949	558728	634859	888604	776477	600588	1273946	1287521	1590328	1498075	1173928	1328463	1269008	1097536	1124659	1564846	8070042	12863718	8248268	8580828	10948652
407	6.54_563.27	563.266	6.542	[M+H]+	MSI 1	polyphenols	Protoporphyrin	ZCFFYALKHPIRKJ-UHFFFAOYSA-N	562.659	C34H34N4O4	CC1=C(C2=CC3=NC(=CC4=NC(=CC5=C(C(=C(N5)C=C1N2)C=C)C)C(=C4CCC(=O)O)C)C(=C3C)CCC(=O)O)C=C	4971								Organic compounds	Organoheterocyclic compounds	Tetrapyrroles and derivatives	Porphyrins	Porphyrins	106985	192675	248325	91956	132841	297066	54467	224764	73863	83810	326262	402028	156351	305005	329908	334015	326684	368078	314066	278862	2033441	2659401	1637908	2729156	2322966
408	5.26_281.15	281.15	5.256	[M+H]+	MSI 2	biogenic amines	Yashabushiketol	OUAINJWTDRNZIJ-ACCUITESSA-N	280.362	C19H20O2	C1=CC=C(C=C1)CCC(CC(=O)/C=C/C2=CC=CC=C2)O	11208265								Organic compounds	Phenylpropanoids and polyketides	Diarylheptanoids	Linear diarylheptanoids	Linear diarylheptanoids	1107483	946562	763201	888196	701474	1018512	1330315	851537	921319	950857	2025876	1977443	2300548	1757802	2222206	2268404	2035250	2060987	1841350	1980939	93246	57907	92534	69072	112359
409	9.92_882.75_9.92_887.71	882.7545_887.7097	9.916_9.918	[M+NH4]+_[M+Na]+	MSI 2	lipidomics	TG 53:6|TG 17:0_18:3_18:3	IYGOQYAYRRPIQZ-UHFFFAOYSA-N												Organic compounds	Lipids and lipid-like molecules	Glycerolipids	Triradylcglycerols	TG	2442338	1972102	6165894	1662877	5831862	4185218	10949041	5323959	5527557	2586803	182772	121380	3227211	1308179	160074	249113	954279	137598	816738	482708	639557	376043	2554871	120039	249580
410	6.40_345.34	345.337	6.397	[M+H-H2O]+	MSI 1	polyphenols	Batyl Alcohol	OGBUMNBNEWYMNJ-UHFFFAOYSA-N	344.573	C21H44O3	CCCCCCCCCCCCCCCCCCOCC(CO)O	3681		C13858			28957	CHEBI:34117		Organic compounds	Lipids and lipid-like molecules	Glycerolipids	Monoradylglycerols	Monoalkylglycerols		37501	28525			18878		22026			137577	115638	30345	94094	131672	130987	103798	145291	32533	100693	502820	787873	545086	846868	328847
411	7.76_248.05	248.051	7.765	[M+H]+	MSI 2	biogenic amines	5-(4-Methyl-2-nitrophenyl)-2-furoic acid	UNSSRIPGQQOYLI-UHFFFAOYSA-N	247.204	C12H9NO5	CC1=CC(=C(C=C1)C2=CC=C(O2)C(=O)O)[N+](=O)[O-]	688283								Organic compounds	Benzenoids	Benzene and substituted derivatives	Nitrobenzenes	Nitrobenzenes	8948	11684	43532	14621	27154	19092	58508	59495	96138	33882	81623	55463	103967	141537	99813	163869	127003	110339	63033	158046	688365	682113	699507	749823	833146
412	5.07_121.06	121.065	5.068	[M+H-NH3]+	MSI 2	biogenic amines	Tyramine	DZGWFCGJZKJUFP-UHFFFAOYSA-N	137.179	C8H11NO	C1=CC(=CC=C1CCN)O	5610	HMDB0000306	C00483				CHEBI:15760		Organic compounds	Benzenoids	Benzene and substituted derivatives	Phenethylamines	Phenethylamines	250835	243377	185447	190023	170796	211695	308116	213325	289320	176527	447331	533233	542893	554853	496364	465465	513820	458204	481256	557000	12093	10994	17294	22878	27780
413	4.48_604.53	604.528	4.477	[M+H-H2O]+	MSI 2	lipidomics	Cer 38:3;O4	NQEFRNPGIMMOKP-UHFFFAOYSA-N												Organic compounds	Lipids and lipid-like molecules	Sphingolipids	Ceramides	Long-chain ceramides	109027	140594	112432	125559	143850	130469	134440	130685	101818	116681	220845	268691	249123	231198	206046	224631	216998	255993	277636	283908	1872175	2296831	1678680	1819743	2188277
414	5.08_284.09	284.091	5.085	[M+Hac-H]-	MSI 3	biogenic amines	N4-Acetylcytidine	NIDVTARKFBZMOT-PEBGCTIMSA-N	285.254	C11H15N3O6	CC(=O)NC1=NC(=O)N(C=C1)[C@H]2[C@@H]([C@@H]([C@H](O2)CO)O)O	107461	HMDB0005923					CHEBI:70989	CPD-11648	Organic compounds	Nucleosides, nucleotides, and analogues	Pyrimidine nucleosides		Pyrimidine nucleosides	589	2860	6126	6755	613	6132	4468	2450	1976	5317	4057	3557	2809	2802	9529	2374	7958	8258	2491	12423	47137	34818	40716	37636	43515
415	1.55_263.14	263.143	1.554	[M+H]+	MSI 2	polyphenols	Ile-Met	TUYOFUHICRWDGA-CIUDSAMLSA-N	262.37	C11H22N2O3S	CC[C@H](C)[C@@H](C(=O)N[C@@H](CCSC)C(=O)[O-])[NH3+]	7020105						CHEBI:74073		Organic compounds	Organic acids and derivatives	Carboxylic acids and derivatives	Amino acids, peptides, and analogues	Peptides		15639	7653		21336	23600		41389	819	13099	4505	21633	12796	16794	13641		37753	38266	38773	24667	263642	360152	263742	453116	395341
416	4.09_498.45	498.452	4.093	[M+H]+	MSI 2	lipidomics	CAR 23:0	WMGNVECUKWPFJX-UHFFFAOYSA-N	497.444	C30H59NO4	CCCCCCCCCCCCCCCCCCCCCCC(=O)OC(CC(=O)[O-])C[N+](C)(C)C	156962526								Organic compounds	Lipids and lipid-like molecules	Fatty Acyls	Fatty esters	Fatty acyl carnitines					4275	3828					4665	7484	11507		7301	13032	15086	4743	22901	10670	64703	20446	99228	85180	77999
417	5.93_137.07	137.071	5.928	[M+H-H2O]+	MSI 2	biogenic amines	3-(1-Methyl-1H-pyrazol-5-yl)propanoic acid	BNIMNWBBWQHMIM-UHFFFAOYSA-N	154.167	C7H10N2O2	CN1C(=CC=N1)CCC(=O)O	19622632								Organic compounds	Organoheterocyclic compounds	Azoles	Pyrazoles	Pyrazoles	394474	407471	327126	351552	306009	362260	556853	348843	374167	375758	871744	891140	912308	862325	853806	816373	850050	837026	801693	758325	8447787	5818594	7915254	7499900	9088294
418	8.40_321.05	321.049	8.397	[M-H]-	MSI 3	biogenic amines	Trimethylolpropane	ZJCCRDAZUWHFQH-UHFFFAOYSA-N	134.174	C6H14O3	CCC(CO)(CO)CO	6510					26449			Organic compounds	Organic oxygen compounds	Organooxygen compounds	Alcohols and polyols	Primary alcohols	141264	110967	76964	83707	83135	113208	134472	88470	113973	113082	63461	91057	109436	80635	63945	96904	56187	87094	32876	58799	18736	10378	14993	6614	20500
419	8.03_620.60	620.599	8.032	[M-H]-	MSI 2	lipidomics	Cer 40:1;O2|Cer 18:1;O2/22:0	KEPQASGDXIEOIL-UHFFFAOYSA-N	622.062	C40H79NO3	CCCCCCCCCCCCCCCCCCCCCC(=O)NC(CO)C(C=CCCCCCCCCCCCCC)O	53990631								Organic compounds	Organic oxygen compounds	Organooxygen compounds	Alcohols and polyols	Secondary alcohols	23059	19066	25072	21292	32396	22978	14760	33359	30886	18106	62160	40704	89611	55901	61626	64526	70499	60047	58968	56725	372731	411825	368573	364882	358197
420	2.44_144.10	144.102	2.445	[M+H]+	MSI 2	biogenic amines	1-Methyl-4-piperidinecarboxylic acid	HCKNAJXCHMACDN-UHFFFAOYSA-N	143.184	C7H13NO2	CN1CCC(CC1)C(=O)O	2736939								Organic compounds	Organoheterocyclic compounds	Piperidines	Piperidinecarboxylic acids and derivatives	Piperidinecarboxylic acids	3649499	3880995	3213875	3073246	2709672	3455617	4560999	2946803	3009520	3106178	7269667	7468583	8357721	7868563	7061485	7862277	6606709	6852929	7154601	7722652	381196	288700	383532	343397	426318
421	3.78_425.36	425.364	3.784	[M-H]-	MSI 2	lipidomics	FAHFA 26:0;O|FAHFA 8:0/18:0;O	ZNFJLHQLXAXPDD-UHFFFAOYSA-N	426.371	C26H50O4	CCCCCCCCCC(CCCCCCCC(=O)O)OC(=O)CCCCCCC	133053745								Organic compounds	Lipids and lipid-like molecules	Fatty Acyls	Fatty acids and conjugates	Long-chain fatty acids	112765	172332	127999	122684	124740	151093	117717	140976	148816	125494	270142	122459	261665	264358	200592	208775	251743	193076	290155	279654	1628230	1677629	1338507	1173237	1459591
422	6.37_344.12	344.117	6.371	[M+Na]+	MSI 2	biogenic amines	p-Fluorococaine	JRPRINGETIYVSV-UHFFFAOYSA-N	321.344	C17H20FNO4	CN1C2CCC1C(C(C2)OC(=O)C3=CC=C(C=C3)F)C(=O)OC	14808821								Organic compounds	Benzenoids	Benzene and substituted derivatives	Benzoic acids and derivatives	Benzoic acid esters	598666	655881	467272	491824	433405	543526	643400	476445	564117	546316	1442684	1381108	1446428	1364807	1036238	1237558	1440832	1213724	1221765	1212515	5475	140223	4302	171400
423	2.00_243.09_2.00_265.07	243.0883_265.0702	1.995_1.996	[M+H]+_[M+H]+	MSI 2	polyphenols	Lumichrome	ZJTJUVIJVLLGSP-UHFFFAOYSA-N	242.234	C12H10N4O2	CC1=CC2=C(C=C1C)N=C3C(=N2)C(=O)NC(=O)N3	5326566		C01727		DB04345		CHEBI:17781	CPD-605	Organic compounds	Organoheterocyclic compounds	Pteridines and derivatives	Alloxazines and isoalloxazines	Flavins	5336833	5439135	7433322	4268219	6579043	8937110	4639449	9685021	3479303	6478315	9655340	10687249	5961429	7470769	11299186	8696869	9236684	10298022	9584548	7946539	572077	766845	621070	729793	661770
424	2.23_123.04	123.044	2.234	[M-H]-	MSI 3	biogenic amines	3-Hydroxybenzyl alcohol	OKVJCVWFVRATSG-UHFFFAOYSA-N	124.137	C7H8O2	C1=CC(=CC(=C1)O)CO	102	HMDB0059712	C03351				CHEBI:17069	3-OH-BENZYL-ALCOHOL	Organic compounds	Benzenoids	Benzene and substituted derivatives	Benzyl alcohols	Benzyl alcohols	112433	64210	41445	84759	44269	59462	79171	76196	58327	57353	117084	99152	94956	81358	127912	92293	71255	103222	102989	65985	796784	603460	739512	679864	825265
425	5.67_509.46_5.66_545.43	509.4574_545.4345	5.667_5.659	[M-H]-_[M+Cl]-	MSI 2	lipidomics	FAHFA 32:0;O|FAHFA 14:0/18:0;O	BTPQSCPUUJROHO-UHFFFAOYSA-N	510.465	C32H62O4	CCCCCCCCCCCCCC(=O)OC(CCCCCCCCC)CCCCCCCC(=O)O	101527437								Organic compounds	Lipids and lipid-like molecules	Fatty Acyls	Fatty acids and conjugates	Long-chain fatty acids	457617	567698	626923	539898	542331	490937	357325	698068	468884	483302	1011661	1176839	1253854	974676	1111096	893732	1154524	843647	1086820	1144977	7077221	9133299	6218212	6787587	8929484
426	2.26_239.09	239.092	2.263	[M-H]-	MSI 2	biogenic amines	2-Furanpropanoic acid, 3-carboxy-4-methyl-5-propyl-	WMCQWXZMVIETAO-UHFFFAOYSA-N	240.253	C12H16O5	CCCC1=C(C(=C(O1)CCC(=O)O)C(=O)O)C	123979	HMDB0061112		LMFA01150004	DB07517		CHEBI:41254		Organic compounds	Lipids and lipid-like molecules	Fatty Acyls	Fatty acids and conjugates	Heterocyclic fatty acids	156843	126795	104903	113994	96155	124126	175325	135995	147890	124055	409143	366956	343983	321726	390962	343785	325103	379488	294999	352521	2040715	1510492	2145121	2196306	2307930
427	7.08_186.09	186.087	7.079	[M+H]+	MSI 2	biogenic amines	1-(2-Methyl-5-nitro-1H-imidazol-1-yl)-2-propanol	KPQZUUQMTUIKBP-UHFFFAOYSA-N	185.181	C7H11N3O3	CC1=NC=C(N1CC(C)O)[N+](=O)[O-]	71815		D07353						Organic compounds	Organoheterocyclic compounds	Azoles	Imidazoles	Substituted imidazoles	53494	45042	35343	39898	41060	37213	54469	36546	25127	50021	50576	44679	24553	31164	46485	42085	53337	47881	50697	26220	502146	370031	449698	440592	556629
428	7.55_602.55	602.551	7.549	[M+H-H2O]+	MSI 2	lipidomics	Cer 39:3;O3|Cer 18:2;O2/21:1;O	JUCQMMBQYGIDFA-UHFFFAOYSA-N												Organic compounds	Lipids and lipid-like molecules	Sphingolipids	Ceramides	Long-chain ceramides	761290	1055647	906552	829834	1663468	1115796	917768	995588	1325688	1024513	117501	110950	133217	47554	144529	109991	135241	143010	128632	145851	10952409	10949310	13144639	12818258	10712332
429	5.82_739.53	739.525	5.816	[M+Na]+	MSI 2	lipidomics	DG 44:10	KERCMTWAJRDWJL-UHFFFAOYSA-N												Organic compounds	Lipids and lipid-like molecules	Glycerolipids	Diradylglycerols	DG	14014	5611	10322	5350	8890		12056	9286	7495			2210			4805	14189		11109	1241	12965	115900	174714	139414	137702	151968
430	12.16_936.90_12.16_941.85	936.8957_941.8498	12.157_12.158	[M+NH4]+_[M+H]+	MSI 1	lipidomics	TG 56:0	DIENWWBYTYPJMQ-UHFFFAOYSA-N												Organic compounds	Lipids and lipid-like molecules	Glycerolipids	Triradylcglycerols	TG	5022618	3936369	4390207	4326418	5569709	3232533	4007379	4204948	3813158	5049204	5345880	6022327	6729404	6135760	4863606	4526208	5589880	5347656	5444296	5589374	445149	488624	395025	688325	268115
431	6.66_330.20	330.202	6.657	[M+H]+	MSI 2	biogenic amines	Benzeneethanamine, 2,5-dimethoxy-N-[(2-methoxyphenyl)methyl]-3,4-dimethyl-	VDAUMFACIMNTDA-UHFFFAOYSA-N	329.199	C20H27NO3	CC1=C(C=C(C(=C1C)OC)CCNCC2=CC=CC=C2OC)OC	118796428								Organic compounds	Benzenoids	Benzene and substituted derivatives	Methoxybenzenes	Dimethoxybenzenes	166119	149057	93657	103275	103496	114981	152203	132879	113796	144186	337965	313252	308745	320098	296598	235692	295062	266184	216122	270521
432	5.45_127.11	127.112	5.445	[M+H]+	MSI 2	biogenic amines	3,3-Dimethylcyclohexanone	ZVJQBBYAVPAFLX-UHFFFAOYSA-N	126.196	C8H14O	CC1(CCCC(=O)C1)C	76322								Organic compounds	Organic oxygen compounds	Organooxygen compounds	Carbonyl compounds	Ketones	49135	31793	37146	43726	27724	38288	70816	51990	33744	44129	124538	83973	136968	84698	121979	140592	76070	81578	92710	88730	10917	3523	4433
433	5.27_745.57_5.28_740.62	745.5722_740.6187	5.273_5.283	[M+Na]+_[M+NH4]+	MSI 2	lipidomics	DG 44:7	XPGNKNYSXUKUBU-UHFFFAOYSA-N												Organic compounds	Lipids and lipid-like molecules	Glycerolipids	Diradylglycerols	DG	150529	290805	255674	184112	387400	266266	200515	229679	271587	275477	560663	659982	664019	558222	655546	666516	683813	544791	634051	742529	9198		7989	32566	32507
434	7.72_134.08	134.081	7.724	[M+Na]+	MSI 1	biogenic amines	N-Methylthreonine	CCAIIPMIAFGKSI-DMTCNVIQSA-N	133.146	C5H11NO3	C[C@H]([C@@H](C(=O)[O-])[NH2+]C)O	7010354								Organic compounds	Organic acids and derivatives	Carboxylic acids and derivatives	Amino acids, peptides, and analogues	Amino acids and derivatives	127388	206128	103311	123914	101998	116978	251646	119746	234250	129594	493182	495466	435966	481847	407033	416875	545508	463054	408098	446016	3688784	3037303	3289092	3486765	4100207
435	4.30_411.18	411.182	4.304	[M+H]+	MSI 3	polyphenols	[9b-hydroxy-6-(hydroxymethyl)-6,9a-dimethyl-3-oxo-1,3a,4,5,5a,7,8,9-octahydrobenzo[e][2]benzofuran-5-yl] benzoate	CMIGVNMYXBHBKY-UHFFFAOYSA-N	388.455	C22H28O6	CC1(CCCC2(C1C(CC3C2(COC3=O)O)OC(=O)C4=CC=CC=C4)C)CO	44715327								Organic compounds	Organoheterocyclic compounds	Naphthofurans		Naphthofurans	32780	60017	48179	24252	76205	72563	20229	75543	15011	48176	68964	73619	28758	51798	80918	56246	52891	62595	40053	42584
436	7.34_908.73	908.734	7.343	[M+NH4]+	MSI 2	lipidomics	TG 54:8;1O|TG 18:3_18:3_18:2;1O	TZLYXBAHKVZGDY-UHFFFAOYSA-N												Organic compounds	Lipids and lipid-like molecules	Glycerolipids	Triradylcglycerols	TG	503826	638057	1530221	237652	2018760	298247	927492	388410	347481	2360491	156875	55282	486466	240792	105176	887789	180680	12502	63143	257909	59625	15189	210187	819864	603248
437	7.56_295.17	295.166	7.564	[M+H]+	MSI 2	biogenic amines	3,4,5-Trimethoxy-N-3-piperidinylbenzamide	YSIITVVESCNIPR-UHFFFAOYSA-N	294.347	C15H22N2O4	COC1=CC(=CC(=C1OC)OC)C(=O)NC2CCCNC2	5597		D01306			23725			Organic compounds	Benzenoids	Phenol ethers	Anisoles	Anisoles	1952184	1993903	1380819	1704516	1434312	1755583	2710589	1713356	1697786	1584387	4751733	4017266	4628953	4312363	3581323	4379345	4030155	3982667	3425413	3512370	247829	185762	237219	176904	220559
438	9.13_852.71	852.708	9.132	[M+NH4]+	MSI 2	lipidomics	TG 51:7|TG 15:1_18:3_18:3	ZETNJGPPYNDUJL-UHFFFAOYSA-N												Organic compounds	Lipids and lipid-like molecules	Glycerolipids	Triradylcglycerols	TG	82143	85647	187300	65219	206553	123280	394317	189246	115954	107650			221271	16522			28721	3851	12757	39748	11462		104000		5582
439	10.07_829.76	829.76	10.069	[M+Na]+	MSI 2	lipidomics	DG 49:0	JHIPKEATSFZWAT-UHFFFAOYSA-N												Organic compounds	Lipids and lipid-like molecules	Glycerolipids	Diradylglycerols	DG	10090	39153	42903	35033	40188	28858	19578	28608	46227	19490	50040	56804	39210	31309	35347	30333	32902	40594	26057	46472	386229	366841	470095	538274	362381
440	1.90_482.36	482.36	1.904	[M+H]+	MSI 2	lipidomics	LPC O-16:0	RKKJZVVEVRCBJA-UHFFFAOYSA-N	481.647	C24H52NO6P	CCCCCCCCCCCCCCCCOC(CO)COP(=O)([O-])OCC[N+](C)(C)C	24802196								Organic compounds	Lipids and lipid-like molecules	Glycerophospholipids	Glycerophosphocholines	Monoalkylglycerophosphocholines	23215	1101	20259	8301	21711	29985	24002	37283	38248	4981	8777			3439	44697	3241	8206	4779		5452	107301	374837	126200	327482	196580
441	1.77_172.10	172.097	1.773	[M+H]+	MSI 2	biogenic amines	(1S,2R)-2-(Aminocarbonyl)cyclohexanecarboxylic acid	LNNRRNLGMOUZCT-RITPCOANSA-N	171.194	C8H13NO3	C1CC[C@@H]([C@@H](C1)C(=O)N)C(=O)O	6928787								Organic compounds	Organic acids and derivatives	Carboxylic acids and derivatives	Carboxylic acid derivatives	Carboxylic acid amides	29598		23224					49551		26859	36263		29479			37404			33589		353346	241925	353210	306139	386180
442	1.11_333.24	333.243	1.108	[M+H]+	MSI 2	biogenic amines	Oxymetholone	ICMWWNHDUZJFDW-DHODBPELSA-N	332.478	C21H32O3	C[C@]12CC[C@H]3[C@H]([C@@H]1CC[C@]2(C)O)CC[C@@H]4[C@@]3(C/C(=C/O)/C(=O)C4)C	5281034		C07393			31827	CHEBI:7864		Organic compounds	Lipids and lipid-like molecules	Sterol lipids	Androstane steroids	Androgens and derivatives	43126				24303		7205	17738	4340	5237	49243	31400	33370	38649	34951	63743	61524	37300	41228	5676	266445	252520	241151	214705	395590
443	8.94_895.68_8.94_890.72	895.6776_890.7233	8.94_8.939	[M+Na]+_[M+NH4]+	MSI 2	lipidomics	TG 54:9|TG 18:3_18:3_18:3	UBEIMDKGOYBUKT-UHFFFAOYSA-N	873.339	C57H92O6	CCC=CCC=CCC=CCCCCCCCC(=O)OCC(COC(=O)CCCCCCCC=CCC=CCC=CCC)OC(=O)CCCCCCCC=CCC=CCC=CCC	123344								Organic compounds	Lipids and lipid-like molecules	Glycerolipids	Triradylcglycerols	TG	296636558	291528317	670634022	176132985	632644556	317722165	1074539177	446647718	342768933	273703491	41727519	26875530	267548239	196543280	32590696	76810803	124291394	26935540	73178133	90286287	69261274	20441700	431121673	33044978	46361229
444	7.44_784.67_7.44_806.65	784.6657_806.6479	7.439_7.439	[M+H]+_[M+Na]+	MSI 3	lipidomics	GlcCer d40:1	YIGARKIIFOHVPF-YAEABVQUSA-N	784.203	C46H89NO8	CCCCCCCCCCCCCCCCCCCCCC(=O)N[C@@H](CO[C@H]1C(C([C@@H]([C@H](O1)CO)O)O)O)[C@@H](/C=C/CCCCCCCCCCCCC)O	6321359			LMSP0501AA07					Organic compounds	Lipids and lipid-like molecules	Sphingolipids	Glycosphingolipids	Glycosphingolipids	37128	41343	10632	42989	33532	25184	30316	41348	10102	24898	54476	67761	111945	14158	98117	102617	65325	56189	123968	87950	371176	337896	291642	295079	424012
445	4.83_484.47	484.473	4.825	[M+H]+	MSI 2	lipidomics	Cer 30:0;O2|Cer 18:0;O2/12:0	UHWYQXNZIBLESO-UHFFFAOYSA-N	483.811	C30H61NO3	CCCCCCCCCCCCCCCC(C(CO)NC(=O)CCCCCCCCCCC)O	11397555								Organic compounds	Lipids and lipid-like molecules	Sphingolipids	Ceramides	Ceramides	71060	90083	71919	53011	74738	83012	87814	63178	99086	56735	123774	161519	144711	81749	129801	153929	166292	132291	153351	183354	799839	690264	758049	684776	982786
446	6.04_359.26	359.257	6.038	[M+H-2H2O]+	MSI 2	polyphenols	Butaprost	PAYNQYXOKJDXAV-ZHIWTBQHSA-N	394.546	C23H38O5	CCCC1(CCC1)[C@H](C/C=C/[C@H]2[C@@H](CC(=O)[C@@H]2CCCCCCC(=O)O)O)O	25886893								Organic compounds	Lipids and lipid-like molecules	Fatty Acyls	Eicosanoids	Prostaglandins and related compounds	1776142	3167379	3033994	1958279	2152809	3293590	2393851	2924419	1918519	3204369	3084432	3752853	3057455	4064344	3744475	4088089	2960910	3503826	3517744	2608382	17801242	23904650	33511547	31043964	30433256
447	6.22_194.10	194.104	6.219	[M+H]+	MSI 2	biogenic amines	(R)-9-(2-Hydroxypropyl)adenine	MJZYTEBKXLVLMY-RXMQYKEDSA-N	193.206	C8H11N5O	C[C@H](CN1C=NC2=C(N=CN=C21)N)O	445211				DB02765				Organic compounds	Organoheterocyclic compounds	Imidazopyrimidines	Purines and purine derivatives	6-aminopurines	524447	565959	459898	486729	450934	520206	693620	489660	531136	517974	1074553	1121616	1272443	1165076	1142477	1201702	1140461	1113357	1051024	1103282	33471	26822	71963	57232	51763
448	6.26_272.14	272.14	6.257	[M+H]+	MSI 2	biogenic amines	N-[(3R)-Quinuclidin-3-yl]furo[2,3-c]pyridine-5-carboxamide	IPKZCLGGYKRDES-ZDUSSCGKSA-N	271.315	C15H17N3O2	C1CN2CCC1[C@H](C2)NC(=O)C3=NC=C4C(=C3)C=CO4	9930121								Organic compounds	Organoheterocyclic compounds	Pyridines and derivatives	Pyridinecarboxylic acids and derivatives	Pyridinecarboxamides	240340	290747	195949	201365	192434	257820	276723	220016	190217	289635	502575	512319	736207	625723	588920	633209	493949	669305	652642	570150	17519	10696	5625	7708	32416
449	1.25_161.99	161.986	1.245	[M-H]-	MSI 2	biogenic amines	6-Methyl-1,2,3-oxathiazin-4(3H)-one 2,2-dioxide	YGCFIWIQZPHFLU-UHFFFAOYSA-N	163.153	C4H5NO4S	CC1=CC(=O)NS(=O)(=O)O1	36573	HMDB0033585					CHEBI:83501		Organic compounds	Organic acids and derivatives	Organic sulfuric acids and derivatives		Organic sulfuric acids and derivatives	887448	979013	654530	662130	593713	809600	1397054	747376	959213	825050	2201045	3119152	2780555	2659832	2684395	2898898	3025428	2702356	2683272	2673868	84925	80143	89013	89879	116697
450	5.31_274.16	274.155	5.31	[M+H]+	MSI 2	biogenic amines	2-{4-[3-(Trifluoromethyl)phenyl]piperazino}-1-ethanamine	YDJUKXZGPAOCSN-UHFFFAOYSA-N	273.298	C13H18F3N3	C1CN(CCN1CCN)C2=CC=CC(=C2)C(F)(F)F	11208050								Organic compounds	Organoheterocyclic compounds	Diazinanes	Piperazines	Phenylpiperazines	2047082	2767485	1961978	1885289	1869154	2132671	2962434	2100930	2132464	2193794	5415281	5438611	4975301	5559391	5184255	5134651	4967896	4466202	4881940	5267237	278217	293137	307909	268225	309840
451	10.37_892.83	892.832	10.371	[M+NH4]+	MSI 2	lipidomics	TG 53:1|TG 16:0_18:0_19:1	YBXJPDJXCJTPPN-UHFFFAOYSA-N												Organic compounds	Lipids and lipid-like molecules	Glycerolipids	Triradylcglycerols	TG	8493	9854	36974	35622	37293	33028	40554	26717	70002	21958	5793	960	14216	10256	8405	9853	12560	7200	6978	8904	246493	211272	280869	327742	236504
452	3.24_354.34	354.337	3.241	[M+H]+	MSI 2	lipidomics	NAE 20:1	YDKRGMXLBRWZJR-KTKRTIGZSA-N	353.583	C22H43NO2	CCCCCCCC/C=C\CCCCCCCCCC(=O)NCCO	5283452			LMFA08040010			CHEBI:73725		Organic compounds	Lipids and lipid-like molecules	Fatty Acyls	Fatty acids and conjugates	NAE	36291	54932	47312	51906	61273	59837	43212	24952	81096	75764	105810	110301	150995	109400	127732	140594	141588	124326	139228	130769	850119	665000	736738	539421	700396
453	5.74_315.23	315.233	5.739	[M+H-CH8O3]+	MSI 2	polyphenols	Misoprostol	OJLOPKGSLYJEMD-URPKTTJQSA-N	382.535	C22H38O5	CCCCC(C)(C/C=C/[C@H]1[C@@H](CC(=O)[C@@H]1CCCCCCC(=O)OC)O)O	5282381	HMDB0015064	D00419		DB00929	20897			Organic compounds	Lipids and lipid-like molecules	Fatty Acyls	Eicosanoids	Prostaglandins and related compounds	101330	232925	263372	118727	205569	396490	154762	273269	88569	248630	203793	279724	218765	289969	392969	289256	199610	233791	283288	272698	1586107	1992541	1986146	2521050	2839876
454	8.07_648.63_8.07_630.62	648.6293_630.6186	8.066_8.067	[M+H]+_[M+H-H2O]+	MSI 1	lipidomics	Cer 42:2;O2|Cer(d18:1/24:1(15Z))	VJSBNBBOSZJDKB-KPEYJIHVSA-N	648.099	C42H81NO3	CCCCCCCCCCCCC/C=C/[C@H]([C@H](CO)NC(=O)CCCCCCCCCCCCC/C=C\CCCCCCCC)O	5283568			LMSP02010009			CHEBI:74450		Organic compounds	Lipids and lipid-like molecules	Sphingolipids	Ceramides	Ceramides	328424	373984	234912	278751	376904	281192	279642	296974	313274	255063	426367	517429	532845	403918	452771	410629	515749	473191	455308	606362	3855850	3654445	3338743	2728483	3306619
455	8.38_696.68	696.68	8.379	[M+H]+	MSI 2	lipidomics	Cer 44:0;O3|Cer 19:0;O2/25:0;O	IKBBSHFCXBOUDY-UHFFFAOYSA-N	695.679	C44H89NO4	CCCCCCCCCCCCCCCCCCCCCCCC(C(=O)NC(CO)C(CCCCCCCCCCCCCCCC)O)O	138177659								Organic compounds	Lipids and lipid-like molecules	Sphingolipids	Ceramides	Long-chain ceramides		8884	6294	29695	9446	5962	11161	6373	12336	14132	15917	12012	16859	12880	5608	14821	20509	5813	24365		9944	10872	9506	14586	17510
456	7.43_424.34	424.343	7.428	[M+H]+	MSI 2	polyphenols	CAR 18:2	MJLXQSQYKZWZCB-DQFWFXSYSA-N	423.63	C25H45NO4	CCCCC/C=C\C/C=C\CCCCCCCC(=O)O[C@H](CC(=O)[O-])C[N+](C)(C)C	6450015	HMDB0006469		LMFA07070009			CHEBI:84098		Organic compounds	Lipids and lipid-like molecules	Fatty Acyls	Fatty acid esters	Acyl carnitines	73655	118162	164463	49642	106845	161890	66865	216615	62785	158095	31574	39927	17357	49550	37649	43034	35037	48496	47326	62820	1128886	1668214	1427872	1534570	1754919
457	4.79_206.09	206.093	4.785	[M+H-C2H2O]+	MSI 2	biogenic amines	N-[2-(5-Nitro-1H-indol-3-yl)ethyl]acetamide	PKDUVHDAPLRJMS-UHFFFAOYSA-N	247.25	C12H13N3O3	CC(=O)NCCC1=CNC2=C1C=C(C=C2)[N+](=O)[O-]	906605								Organic compounds	Organic acids and derivatives	Carboxylic acids and derivatives	Carboxylic acid derivatives	Carboxylic acid amides	123944	141949	94854	115112	79198	129456	158439	111018	115445	113190	376983	357862	418704	387678	326419	321727	355708	331725	389221	372763	2430054	1954750	2390587	2181526	2827804
458	4.61_575.47	575.465	4.614	[M+Na]+	MSI 2	lipidomics	DG 31:1	XONUZMKSMGHSFE-UHFFFAOYSA-N												Organic compounds	Lipids and lipid-like molecules	Glycerolipids	Diradylglycerols	DG	17110	17257	17288	8194	15272	23536	4581		12402	7988	73873	79112	90942	12450	62499	61406	69903	155818	68476	183483	185738	92739	212168	161402	185881
459	9.51_349.23	349.231	9.514	[2M+H]+	MSI 2	biogenic amines	Arginine	ODKSFYDXXFIFQN-BYPYZUCNSA-N	174.201	C6H14N4O2	C(C[C@@H](C(=O)O)N)CN=C(N)N	28782	HMDB0000517	C00062		DB00125	47358	CHEBI:16467		Organic compounds	Organic acids and derivatives	Carboxylic acids and derivatives	Amino acids, peptides, and analogues	Amino acids and derivatives	32643	4448	5578	9991	11569	4747	12320	4563	14812	20287	168392	160101	219154	172714	131403	131916	207871	137202	145861	305152	674372	790365	728572	605859	895194
460	6.21_328.32	328.322	6.212	[M+H]+	MSI 2	polyphenols	Stearoyl-EA	OTGQIQQTPXJQRG-UHFFFAOYSA-N	327.546	C20H41NO2	CCCCCCCCCCCCCCCCCC(=O)NCCO	27902	HMDB0013078		LMFA08040051			CHEBI:85299		Organic compounds	Organic nitrogen compounds	Organonitrogen compounds	Amines	Alkanolamines	222746	553798	606816	349970	386901	299853	377528	570720	314397	136263	710999	833304	541818	892213	829654	913333	718421	910111	537880	658207	2901415	4137020	3663442	4953823	4156335
461	8.46_939.76	939.762	8.462	[M+Na]+	MSI 2	lipidomics	TG O-58:8|TG O-22:5_18:1_18:2	PPDCUCYEBRYING-UHFFFAOYSA-N												Organic compounds	Lipids and lipid-like molecules	Glycerolipids	Triradylcglycerols	TG	46146	22848	20632	17487	82830	13224	16392		14314	14317									3194		248291	239226	270173	259138	240160
462	10.30_719.57_10.30_714.62	719.5733_714.6189	10.301_10.304	[M+H]+_[M+NH4]+	MSI 1	lipidomics	CE 22:6	VOEVEGPMRIYYKC-HNJOWPRISA-N	697.128	C49H76O2	CC/C=C\C/C=C\C/C=C\C/C=C\C/C=C\C/C=C\CCC(=O)O[C@H]1CC[C@@]2([C@H]3CC[C@]4([C@H]([C@@H]3CC=C2C1)CC[C@@H]4[C@H](C)CCCC(C)C)C)C	14274978			LMST01020019			CHEBI:74102		Organic compounds	Lipids and lipid-like molecules	Sterol lipids	Steroid esters	Cholesteryl esters	101272	102496	96200	80511	73853	93018	85028	88724	89019	89264	126458	127507	135109	174053	136890	142367	149954	149254	173680	163337	1321354	2323454	790958	1267364	1363749
463	5.15_810.60	810.601	5.146	[M+H]+	MSI 2	lipidomics	PC 38:4	PSVRFUPOQYJOOZ-QNPWAGBNSA-N	810.137	C46H84NO8P	CCCCCCCCCCCCCCCCCC(=O)OC[C@H](COP(=O)([O-])OCC[N+](C)(C)C)OC(=O)CCC/C=C\C/C=C\C/C=C\C/C=C\CCCCC	16219824	HMDB0008048		LMGP01010802			CHEBI:74965		Organic compounds	Lipids and lipid-like molecules	Glycerophospholipids	Glycerophosphocholines	PC	62386	144877	75565	67184	64742	88819	56902	69644	95762	36048	136792	130182	200070	18569	150991	106331	111156	145715	104876	152364	1032622	997307	1172471	1243190	1142278
464	8.43_636.63_8.43_618.62	636.6295_618.6187	8.432_8.433	[M+H]+_[M+H-H2O]+	MSI 1	lipidomics	Cer 41:1;O2|Cer(d18:1/23:0)	NAJHAHQNQCNWOP-PUYNVXOJSA-N	636.088	C41H81NO3	CCCCCCCCCCCCCCCCCCCCCCC(=O)N[C@@H](CO)[C@@H](/C=C/CCCCCCCCCCCCC)O	52931115	HMDB0000950		LMSP02010021			CHEBI:84372		Organic compounds	Lipids and lipid-like molecules	Sphingolipids	Ceramides	Ceramides	169239	193955	157088	137338	216409	178476	162187	133843	188827	144431	262792	246650	386875	188873	285012	271963	341733	249708	264183	329234	1474315	2064362	1616720	1728215	1606735
465	7.04_260.16	260.161	7.042	[M+H]+	MSI 2	biogenic amines	Gln-Leu	ARPVSMCNIDAQBO-YUMQZZPRSA-N	259.303	C11H21N3O4	CC(C)C[C@@H](C(=O)O)NC(=O)[C@H](CCC(=O)N)N	44232492	HMDB0028801							Organic compounds	Organic acids and derivatives	Carboxylic acids and derivatives	Amino acids, peptides, and analogues	Peptides	147603	149373	133605	124797	133525	123796	167811	127047	105681	124742	199003	141923	145741	182954	123477	164413	188250	186205	217589	193321	5896	7947	10702	17239	9123
466	5.16_533.46	533.458	5.161	[M-H]-	MSI 2	lipidomics	FAHFA 34:2;O|FAHFA 18:2/16:0;O	LZKUWZWNBYLKIE-UHFFFAOYSA-N												Organic compounds	Lipids and lipid-like molecules	Fatty Acyls	Fatty acids and conjugates	Long-chain fatty acids	102657	149541	171187	405087	187570	146177	174283	192941	138019	130685	286735	307453	406004	453950	302212	323809	356747	273778	306636	326624	1671137	1978661	1295119	1613476	1253280
467	14686	361	1131821	[M]*+	MSI 1	primary metabolism	Levan	AIHDCSAXVMAMJH-GFBKWZILSA-N	504.438	C18H32O16	C([C@@H]1[C@H]([C@@H]([C@](O1)(CO)OC[C@@H]2[C@H]([C@@H]([C@](O2)(CO)CO[C@@H]3[C@H]([C@@H]([C@](O3)(CO)O)O)O)O)O)O)O)O	22833608	HMDB0003539							Organic compounds	Organic oxygen compounds	Organooxygen compounds	Carbohydrates and carbohydrate conjugates	Glycosyl compounds	406	410	393	317	236	503	430	319	354	280	386	456	366	351	495	368	425	401	357	332	4249	3443	4523	4268	4228
468	6.83_208.03	208.028	6.825	[M-H]-	MSI 2	biogenic amines	5-(4-Fluoro-3-nitrophenyl)-1H-tetraazole	YUJQZCDGMQSNKW-UHFFFAOYSA-N	209.138	C7H4FN5O2	C1=CC(=C(C=C1C2=NNN=N2)[N+](=O)[O-])F	1250491								Organic compounds	Organoheterocyclic compounds	Azoles	Tetrazoles	Phenyltetrazoles and derivatives	8336	10799	3615	4375	7270	4742	7547	5195	3008	6054	11538	24921	16411	17329	23234	20917	20172	12960	15632	13612	93995	64815	96294	95002	108350
469	6.09_598.50	598.498	6.088	[M+CH3COO]-	MSI 2	lipidomics	Cer 33:1;O3|Cer 18:0;O2/15:1;O	YZHPELIPKZCOMX-UHFFFAOYSA-N												Organic compounds	Lipids and lipid-like molecules	Sphingolipids	Ceramides	Long-chain ceramides	175537	253256	225797	306158	198452	284139	202365	196675	188661	183049	283072	330100	311797	347265	367737	318650	442386	301648	314312	320179	3077960	2794115	2967081	2785219	2901703
470	6.83_352.16	352.161	6.833	[M+H]+	MSI 2	biogenic amines	N-2-Hydroxycyclopentyladenosine	RMRYVILDUDPDHN-LVFHOJSVSA-N	405.142	C15H24ClN5O6	C1C[C@@H]([C@H](C1)O)NC2=C3C(=NC=N2)N(C=N3)[C@H]4[C@H](C([C@H](O4)CO)O)O.O.Cl	23581827								Organic compounds	Organic acids and derivatives	Carboxylic acids and derivatives	Amino acids, peptides, and analogues	Amino acids and derivatives				7938		11555		15989							25166		23850				210929	144907	160482	253519	179505
471	7.74_392.18	392.183	7.743	[M+Hac-H]-	MSI 3	biogenic amines	Glu-Val-Phe	FVGOGEGGQLNZGH-DZKIICNBSA-N	393.435	C19H27N3O6	CC(C)[C@@H](C(=O)N[C@@H](CC1=CC=CC=C1)C(=O)O)NC(=O)[C@H](CCC(=O)O)N	193678								Organic compounds	Organic acids and derivatives	Carboxylic acids and derivatives	Amino acids, peptides, and analogues	Peptides	4313	3697		1127	2049	3393	1434	1396	3876	961	4276	10377	11573	5866	11685	11004	14308	9556	3232	5739	53088	23785	37865	30954	58775
472	12.13_852.85	852.853	12.134	[M+NH4]+	MSI 2	lipidomics	TG O-51:0|TG O-19:0_16:0_16:0	FAFWRIRSAPSLEN-UHFFFAOYSA-N												Organic compounds	Lipids and lipid-like molecules	Glycerolipids	Triradylcglycerols	TG	181309	348388	273888	260373	322860	269498	317308	267747	309769	294403	473028	499864	595168	403074	338822	483471	489074	477245	593137	417829	6991		9263	14164	32586
473	7.81_622.58	622.577	7.809	[M+H]+	MSI 2	lipidomics	Cer 39:2;O3|Cer 18:1;O2/21:1;O	YIXDUCWXPZNERS-UHFFFAOYSA-N												Organic compounds	Lipids and lipid-like molecules	Sphingolipids	Ceramides	Long-chain ceramides	53416	56112	36393	62080	53130	48473	77323	47329	74173	78874	211653	203296	210475	196329	268123	227106	266989	212122	225702	272730	209127	150684	168972	226362	230721
474	5.96_415.25	415.247	5.963	[M+Na]+	MSI 2	polyphenols	[(1S,7S,8S,8aS)-8-[2-[(2R,4R)-4-Hydroxy-6-oxooxan-2-yl]ethyl]-7-methyl-1,2,3,4,4a,7,8,8a-octahydronaphthalen-1-yl] (2S)-2-methylbutanoate	VXDSGTRNDFHIJB-WWPRMLFWSA-N	392.53	C23H36O5	CC[C@H](C)C(=O)O[C@H]1CCCC2[C@H]1[C@H]([C@H](C=C2)C)CC[C@@H]3C[C@H](CC(=O)O3)O	10000607								Organic compounds	Organoheterocyclic compounds	Lactones	Delta valerolactones	Delta valerolactones	99336	142941	160912	96831	178038	282141	96069	313515	71925	190176	11618		9844					12528		11873	2835357	3090198	3460003	3698466	4352720
475	2.79_116.07	116.071	2.786	[M+H-H2O]+	MSI 2	biogenic amines	(4S)-4-Amino-5-hydroxypentanoic acid	JPYGFLFUDLRNKX-BYPYZUCNSA-N	133.146	C5H11NO3	C(CC(=O)O)[C@@H](CO)N	9547920								Organic compounds	Organic acids and derivatives	Carboxylic acids and derivatives	Amino acids, peptides, and analogues	Amino acids and derivatives	1873652	2038059	1705404	1612840	1475627	1768172	2483078	1675816	2071129	1991146	4269316	4614291	4751733	4565515	4097580	4609042	4702235	4191055	4378465	4881106	35225547	25935427	35088746	30982191	37688997
476	3.37_343.12	343.118	3.374	[M+H]+	MSI 3	polyphenols	[(2R)-1-[(2S)-6-oxo-2,3-dihydropyran-2-yl]propan-2-yl] 3-(3,4-dihydroxyphenyl)propanoate	DEJPAJWPCTUPPL-YPMHNXCESA-N	320.338	C17H20O6	C[C@H](C[C@@H]1CC=CC(=O)O1)OC(=O)CCC2=CC(=C(C=C2)O)O	11782184								Organic compounds	Benzenoids	Phenols	Benzenediols	Catechols	16076	21902	40019	6480	29142	38807	6660	46713	6507	26202	94546	129357	64499	78912	121028	80906	89549	108815	79213	85787	6681	15507		6268
477	7.86_213.12	213.124	7.864	[M+H]+	MSI 2	biogenic amines	Pro-Pro	RWCOTTLHDJWHRS-YUMQZZPRSA-N	212.246	C10H16N2O3	C1C[C@H](NC1)C(=O)N2CCC[C@H]2C(=O)O	11622593						CHEBI:73646		Organic compounds	Organic acids and derivatives	Carboxylic acids and derivatives	Amino acids, peptides, and analogues	Peptides	806498	708759	550137	486120	585851	680359	927584	515155	546917	558853	3016972	3202926	3286497	3414934	2785463	3260262	3671267	3364695	2426462	3370234	18010082	10632529	12952181	10791801	18724041
478	5.92_566.51	566.514	5.916	[M+H]+	MSI 2	lipidomics	Cer 35:2;O3|Cer 18:0;O2/17:2;O	SBPOOQXHLCFABZ-UHFFFAOYSA-N												Organic compounds	Lipids and lipid-like molecules	Sphingolipids	Ceramides	Long-chain ceramides	284757	457927	349255	309165	437058	332407	369699	449136	455019	341628	109980	101867	153859		94790	114613	116670	94930	130150	136157	7003775	5150639	7514430	9600659	7363250
479	1.05_301.22	301.216	1.049	[M+Na]+	MSI 3	biogenic amines	Retinoic acid	SHGAZHPCJJPHSC-YCNIQYBTSA-N	300.436	C20H28O2	CC1=C(C(CCC1)(C)C)/C=C/C(=C/C=C/C(=C/C(=O)O)/C)/C	444795	HMDB0001852	C00777	LMPR01090019		21239	CHEBI:15367		Organic compounds	Lipids and lipid-like molecules	Prenol lipids	Retinoids	Retinoids	244256	331293	262590	171593	196209	270107	373893	221213	238333	178995	298324	218019	303254	385557	179419	277144	228805	326052	251314	77163	28746	18551	32212	18238	10370
480	10.82_666.62_10.81_671.57	666.6187_671.5742	10.818_10.807	[M+NH4]+_[M+H]+	MSI 1	lipidomics	CE 18:2	NAACPBBQTFFYQB-LJAITQKLSA-N	649.085	C45H76O2	CCCCC/C=C\C/C=C\CCCCCCCC(=O)O[C@H]1CC[C@@]2([C@H]3CC[C@]4([C@H]([C@@H]3CC=C2C1)CC[C@@H]4[C@H](C)CCCC(C)C)C)C	5287939	HMDB0000610	C15441	LMST01020008					Organic compounds	Lipids and lipid-like molecules	Sterol lipids	Steroid esters	Cholesteryl esters	657581	988167	864072	970904	899400	909223	1507434	886123	678873	837963	1153765	1108868	1718573	1377275	1482400	1301172	1477434	1409251	1829328	1722364	11991368	23576500	11500001	15551925	15005782
481	0.93_291.23	291.233	0.932	[M-H]-	MSI 2	lipidomics	Nonadecatrienoic acid	YBJSEORNHLUPJD-JYASHPIESA-N	292.457	C19H32O2	CCCCCCCCCCCC/C=C/C=C/C=C/C(=O)O	87702297								Organic compounds	Lipids and lipid-like molecules	Fatty Acyls	Fatty acids and conjugates	Long-chain fatty acids	7658	12733	12300	13942	6159		23314		8190	19740	78719	89910	29804	86502	121186	46194	125701	115081	71619	128414	227705	212839	218305	236703	215707
482	3.29_347.15	347.15	3.289	[M+H-H2O]+	MSI 3	polyphenols	cynaropicrin	KHSCYOFDKADJDJ-NQLMQOPMSA-N	346.375	C19H22O6	C=C1C[C@@H]([C@@H]2[C@@H]([C@@H]3[C@H]1C[C@@H](C3=C)O)OC(=O)C2=C)OC(=O)C(=C)CO	119093		C09385				CHEBI:4038		Organic compounds	Lipids and lipid-like molecules	Prenol lipids	Terpene lactones	Sesquiterpene lactones	73806	59283	102007	44434	81163	102417	14103	98822	49244	62383	131162	159852	111833	126082	143878	130534	130542	146800	122162	104435	4102	12309			5417
483	4.95_498.49_4.95_520.47	498.4876_520.4705	4.946_4.945	[M+H]+	MSI 2	lipidomics	Cer 31:0;O2|Cer 16:0;O2/15:0	PLFQAPACHYBKNX-UHFFFAOYSA-N	497.481	C31H63NO3	CCCCCCCCCCCCCCC(=O)NC(CO)C(CCCCCCCCCCCCC)O	132994308								Organic compounds	Lipids and lipid-like molecules	Sphingolipids	Ceramides	Ceramides	413809	379985	386699	405313	437582	449788	406969	428323	434222	273443	504368	586546	507543	614314	677850	626782	709763	580758	682627	756636	25276		13118	14573	29181
484	10.35_768.71_10.35_773.66	768.7078_773.6632	10.352_10.349	[M+NH4]+_[M+Na]+	MSI 1	lipidomics	TG 44:0|TG 12:0_14:0_18:0	ZPXAKNNNRATWOJ-UHFFFAOYSA-N	750.674	C47H90O6	CCCCCCCCCCCCCCCCCC(=O)OCC(COC(=O)CCCCCCCCCCC)OC(=O)CCCCCCCCCCCCC	138315726								Organic compounds	Lipids and lipid-like molecules	Glycerolipids	Triradylcglycerols	TG	350068	345756	355751	296479	419101	486060	370998	285896	399424	586314	365753	379663	314213	1245123	397570	541749	388435	406841	396407	792983	5645590	5659278	5379176	7141317	6869631
485	9.52_124.02	124.016	9.515	[M-H]-	MSI 3	biogenic amines	Ciliatine	QQVDJLLNRSOCEL-UHFFFAOYSA-N	125.064	C2H8NO3P	C(CP(=O)(O)O)N	339	HMDB0011747	C03557				CHEBI:15573	CPD-1106	Organic compounds	Organic acids and derivatives	Organic phosphonic acids and derivatives	Organic phosphonic acids	Organic phosphonic acids	7226	10663	1929	4480		5165	6678	1408	2897	1454	1496			1369	5536	8170	2837	4749	1858	3530	63735	40802	82755	67582	86039
486	8.46_934.81	934.807	8.462	[M+NH4]+	MSI 2	lipidomics	TG 54:3;2O|TG 18:1_18:2_18:0;2O	IJATYQDGGPOBSU-UHFFFAOYSA-N												Organic compounds	Lipids and lipid-like molecules	Glycerolipids	Triradylcglycerols	TG	6523	5525			28625		8689		17516												115420	75197	129126	96016	116999
487	0.96_321.28	321.279	0.961	[M+H]+	MSI 2	biogenic amines	Dihomo-.gamma.-linolenic acid methyl ester	QHATYOWJCAQINT-JPFHKJGASA-N	320.51	C21H36O2	CCCCC/C=C\C/C=C\C/C=C\CCCCCCC(=O)OC	5363092								Organic compounds	Lipids and lipid-like molecules	Fatty Acyls	Fatty acid esters	Fatty acid methyl esters	968996	64778	73283	12747	596175	11949	46163	35871	29020	30657	120603	92636	46588	168936	99404	171409	5142975	229762	193978	41335	1428458	1450951	296990	529114	1407422
488	7.76_910.75	910.749	7.763	[M+NH4]+	MSI 2	lipidomics	TG 54:7;1O|TG 18:3_18:3_18:1;1O	XSTZWDKMLJFKLB-UHFFFAOYSA-N												Organic compounds	Lipids and lipid-like molecules	Glycerolipids	Triradylcglycerols	TG	1327049	938388	2271602	504044	2475420	1046860	4291835	1325344	1564504	1399341	147075	33629	1473856	371963	106190	427081	417298	32934	175776	276486	126196		196591	200139	251660
489	8.64_190.12	190.119	8.643	[M+H]+	MSI 2	biogenic amines	Homocitrulline	XIGSAGMEBXLVJJ-YFKPBYRVSA-N	189.213	C7H15N3O3	C(CCNC(=O)N)C[C@@H](C(=O)O)N	65072	HMDB0000679	C02427				CHEBI:17443	CPD-161	Organic compounds	Organic acids and derivatives	Carboxylic acids and derivatives	Amino acids, peptides, and analogues	Amino acids and derivatives	431943	486228	367986	348765	296277	449006	601510	395746	441921	409686	1126250	1204671	1223087	1113493	1004948	1262686	1117593	1155741	1060708	1075063	8401932	5628308	6548773	6635998	8573786
490	4.87_234.10	234.099	4.871	[M+H]+	MSI 2	biogenic amines	1-(4-Ethylphenyl)-5-oxo-3-pyrrolidinecarboxylic acid	DFTUTKZCUVWXKB-UHFFFAOYSA-N	233.264	C13H15NO3	CCC1=CC=C(C=C1)N2CC(CC2=O)C(=O)O	2900602								Organic compounds	Organoheterocyclic compounds	Pyrrolidines	Phenylpyrrolidines	Phenylpyrrolidines	1278533	1193795	999459	1070249	1012932	1124023	1347337	1082273	1327294	1060355	2711432	2699739	2655844	2679378	2394866	2556085	2413604	2445875	2714057	2526658	133378	124058	137540	170477	153307
491	1.58_167.08	167.081	1.58	[M+H]+	MSI 2	biogenic amines	2-(Dimethylamino)nicotinic acid	BFXXGHDBAKMDRJ-UHFFFAOYSA-N	166.178	C8H10N2O2	CN(C)C1=C(C=CC=N1)C(=O)O	24266716								Organic compounds	Organoheterocyclic compounds	Pyridines and derivatives	Pyridinecarboxylic acids and derivatives	Pyridinecarboxylic acids	104248	294631	140441	318110	40640	168334	268157	173884	669347	201460		146123	108097	144140	157527	305353	253285	156783	197756	991250	1821216	812401	1741411	1327612	1878470
492	8.36_624.59	624.593	8.362	[M+H]+	MSI 2	lipidomics	Cer 39:1;O3|Cer 18:0;O2/21:1;O	POZPDTKZLHYTKV-UHFFFAOYSA-N												Organic compounds	Lipids and lipid-like molecules	Sphingolipids	Ceramides	Long-chain ceramides	103466	123185	105466	129199	82507	147991	152310	90661	146464	140205	267436	269571	300108	257608	257002	246533	325652	234645	337336	282296	283392	348106	294933	346780	304358
493	3.84_755.56	755.561	3.844	[M+Na]+	MSI 2	lipidomics	DG 45:9	PEGOMYLTSMJGKA-UHFFFAOYSA-N												Organic compounds	Lipids and lipid-like molecules	Glycerolipids	Diradylglycerols	DG	3573					4175				5798	17764	16254	21878		6038	30184	17828	9442	26749	4395	101321	101212	103557	91650	80879
494	5.87_746.58	746.578	5.868	[M+NH4]+	MSI 2	lipidomics	MGDG 32:1|MGDG 14:0_18:1	WLPBTXSMGKRNSH-UHFFFAOYSA-N	729.038	C41H76O10										Organic compounds	Lipids and lipid-like molecules	Glycerolipids	Glycosylglycerols	MGDG	57883	112935	62193	58458	101027	87823	65461	97872	81479	50299	68922	54823	77011		59736	55273	79064	69126	88120	115656					7299
495	6.76_355.19	355.186	6.762	[M+Na]+	MSI 2	biogenic amines	Marrubiin	HQLLRHCTVDVUJB-OBHOOXMTSA-N	332.435	C20H28O4	C[C@@H]1C[C@@H]2[C@H]3[C@](CCC[C@@]3([C@]1(CCC4=COC=C4)O)C)(C(=O)O2)C	73401		C09128				CHEBI:6696		Organic compounds	Organoheterocyclic compounds	Lactones	Gamma butyrolactones	Gamma butyrolactones	98163	153629	106872	87180	67589	97870	111264	80750	68511	95182	241906	269759	242119	214546	212788	279836	327127	216953	210136	168467	15102	8438	9293	5435	12612
496	8.00_202.08	202.082	8	[M+H-CH3N]+	MSI 2	biogenic amines	1-Methyl-2,3,4,9-tetrahydro-1H-beta-carboline-1-carboxylic acid	CNUNWGNKMNLSTM-UHFFFAOYSA-N	230.263	C13H14N2O2	CC1(C2=C(CCN1)C3=CC=CC=C3N2)C(=O)O	4247395								Organic compounds	Alkaloids and derivatives	Harmala alkaloids		Harmala alkaloids						12634	20378											4207			100580	91191	98155	83484	131903
497	9.87_859.71	859.715	9.874	[M+Na]+	MSI 2	lipidomics	DG 52:6	LIOLLSKTYUSVJF-UHFFFAOYSA-N												Organic compounds	Lipids and lipid-like molecules	Glycerolipids	Diradylglycerols	DG	27897	19413	18440	92591	29539	117474	16656	13284	41028	28828	28191	16607	16370		13681	14511	21072	21949	34657	42873	223520	171230	180719	178889	258945
498	9.35_893.74	893.741	9.347	[M+Na]+	MSI 2	lipidomics	TG 53:3|TG 16:0_19:1_18:2	CNMBZJFPDMUBIA-UHFFFAOYSA-N												Organic compounds	Lipids and lipid-like molecules	Glycerolipids	Triradylcglycerols	TG	144646095	106565078	291980069	77567625	368091904	138883213	474877745	234492763	193914284	145708449	13527822	9067279	153015498	52567929	14464681	18285738	39509992	10573803	22356142	25949536	27912129	12484456	154902623	13650124	16121782
499	7.76_204.09	204.087	7.763	[M+H-C4H8]+	MSI 2	biogenic amines	1-tert-Butyl 3-methyl 5-hydroxypiperidine-1,3-dicarboxylate	DFZMPKMSTNKZKL-UHFFFAOYSA-N	259.299	C12H21NO5	CC(C)(C)OC(=O)N1CC(CC(C1)O)C(=O)OC	45790959								Organic compounds	Organoheterocyclic compounds	Piperidines	Piperidinecarboxylic acids and derivatives	Piperidinecarboxylic acids	312217	254145	206719	235606	239878	221255	444158	224143	306523	285483	762312	713094	619337	643731	464811	697570	817988	620922	558753	739685	4280675	3807276	4086784	3994212	4721022
500	1.56_235.10	235.097	1.556	[M-H]-	MSI 1	biogenic amines	Carboxyibuprofen	DIVLBIVDYADZPL-UHFFFAOYSA-N	236.264	C13H16O4	CC(CC1=CC=C(C=C1)C(C)C(=O)O)C(=O)O	10444113	HMDB0060564							Organic compounds	Phenylpropanoids and polyketides	Phenylpropanoic acids		Phenylpropanoic acids	9860	13708	4092	6979	8741	6240	10427	4983	8015	10467	27814	49484	29392	37680	41316	38323	36327	37988	29598	43972	148645	142531	134385	151139	163078
501	6.41_275.11	275.11	6.409	[M+H]+	MSI 2	biogenic amines	Dikegulac acid	FWCBATIDXGJRMF-FLNNQWSLSA-N	274.268	C12H18O7	CC1(OC[C@H]2[C@@H](O1)[C@H]3[C@@](O2)(OC(O3)(C)C)C(=O)O)C	65420		C18825				CHEBI:81986		Organic compounds	Organic oxygen compounds	Organooxygen compounds	Ethers	Acetals	273495	310101	231325	299012	269213	293256	369797	305396	332791	301784	468056	459510	468405	522254	368620	461776	551842	473667	460886	497963	31637	12771	23766	29097	43772
502	2.02_328.13	328.133	2.025	[M+H]+	MSI 3	polyphenols	Picrotin	RYEFFICCPKWYML-QCGISDTRSA-N	310.3	C15H18O7	C[C@@]12[C@H]3[C@H]4[C@H]([C@@H]([C@@]1(C[C@@H]5[C@]2(O5)C(=O)O3)O)C(=O)O4)C(C)(C)O	442291		C09528				CHEBI:8205		Organic compounds	Organoheterocyclic compounds	Furopyrans		Furopyrans								7915											16681		85243	128482	58435	120690	113604
503	5.48_591.32	591.318	5.481	[M+H]+	MSI 2	biogenic amines	L-Urobilin	TYOWQSLRVAUSMI-WKULSOCRSA-N	594.743	C33H46N4O6	CCC1C(C(=O)NC1CC2=N/C(=C/C3=C(C(=C(N3)CC4C(C(C(=O)N4)CC)C)C)CCC(=O)O)/C(=C2C)CCC(=O)O)C	5280818	HMDB0004159							Organic compounds	Organoheterocyclic compounds	Tetrapyrroles and derivatives	Bilirubins	Bilirubins	1153261	858366	782655	634648	771539	810239	1012951	754984	779503	872874	1614322	2144418	1874541	1795410	2012450	1934542	1926808	1951014	1294450	1937484	9727318	8093399	10013770	10924842	12535106
504	2.11_123.04	123.044	2.114	[M-H-CO2]-	MSI 2	biogenic amines	2,6-Dihydroxy-4-methylbenzoic acid	YBZAVRDNSPUMFK-UHFFFAOYSA-N	168.147	C8H8O4	CC1=CC(=C(C(=C1)O)C(=O)O)O	68074								Organic compounds	Benzenoids	Benzene and substituted derivatives	Benzoic acids and derivatives	Hydroxybenzoic acid derivatives	34221	50750	35259	35559	30987	43484	60398	39550	41161	45077	99531	127500	109617	116278	99273	123560	123300	114929	112599	120318	671999	476665	565653	540305	746109
505	6.42_558.51	558.51	6.42	[M+NH4]+	MSI 2	lipidomics	DG 30:0|DG 15:0_15:0	FWYXULJVROPNGE-UHFFFAOYSA-N	540.86	C33H64O5	CCCCCCCCCCCCCCC(=O)OCC(CO)OC(=O)CCCCCCCCCCCCCC	19421281								Organic compounds	Lipids and lipid-like molecules	Glycerolipids	Diradylglycerols	DG	172989	221108	142482	162142	150155	124234	162435	158778	203120	136072	71530	51067	97056	48897	82053	77158	114963	115326	89504	103855	14903	23870	26473	7568	6358
506	6.64_607.54	607.542	6.639	[M-H]-	MSI 2	lipidomics	FA 42:6	JHOILAIIFLUKPO-UHFFFAOYSA-N												Organic compounds	Lipids and lipid-like molecules	Fatty Acyls	Fatty acids and conjugates	Fatty acids	80389	85262	96094	107981	71955	117945	99333	114753	64614	93174	101280	99091	111247	193179	222627	184241	146083	201555	181026	195556	797922	949736	889165	826066	884790
507	10.36_794.72_10.36_799.68	794.7234_799.6787	10.363_10.36	[M+NH4]+_[M+Na]+	MSI 1	lipidomics	TG 46:1|TG 12:0_16:0_18:1	KKDKCSAJJXXLKK-UHFFFAOYSA-N												Organic compounds	Lipids and lipid-like molecules	Glycerolipids	Triradylcglycerols	TG	449330	537740	514397	392328	566742	612828	523655	532278	610529	597545	412208	492182	448189	1094542	443367	441279	545302	542306	365139	581495	9841597	9248726	10392345	12612457	10245364
508	5.38_727.53	727.527	5.378	[M+Na]+	MSI 2	lipidomics	DG 43:9	LOOPTAHZDFSQNI-UHFFFAOYSA-N												Organic compounds	Lipids and lipid-like molecules	Glycerolipids	Diradylglycerols	DG	16845	22844	24346	4322	16658	16900	12900	25862	20404	18841	60236	45003	59295	12284	40216	69335	37807	52311	36488	61273	239191	201547	146326	187591	207050
509	5.20_507.44	507.442	5.203	[M-H]-	MSI 2	lipidomics	FAHFA 32:1;O|FAHFA 14:0/18:1;O	KKURJVQTCDKXRR-UHFFFAOYSA-N												Organic compounds	Lipids and lipid-like molecules	Fatty Acyls	Fatty acids and conjugates	Long-chain fatty acids	27221	10057	36397	105656	42570	27594	45107	26766	22718	26083	61704	54850	72800	108885	69660	34830	77069	44203	66217	94510	308729	320363	281802	278359	253447
510	9.46_377.16	377.156	9.462	[M+H]+	MSI 2	biogenic amines	Ailanthone	WBBVXGHSWZIJST-RLQYZCPESA-N	376.401	C20H24O7	CC1=CC(=O)[C@H]([C@]2([C@H]1C[C@@H]3[C@]45[C@@H]2[C@]([C@@H](C(=C)[C@@H]4CC(=O)O3)O)(OC5)O)C)O	72965		C08747				CHEBI:2522		Organic compounds	Lipids and lipid-like molecules	Prenol lipids	Terpene lactones	Quassinoids	20643	35458	11004	33750	8749	32106	42168	33926	25542	35028	18585	42781	52700	34617	31657	13240	25384	23217	26204	54652	286140	182904	295748	153520	320595
511	6.70_620.56	620.562	6.699	[M+NH4]+	MSI 2	lipidomics	DG O-36:4|DG O-19:1_17:3	JGSSKHWKVFXDGQ-UHFFFAOYSA-N												Organic compounds	Lipids and lipid-like molecules	Glycerolipids	Diradylglycerols	1-alkyl,2-acylglycerols	13290564	18760838	14439720	15405754	19036318	13008071	14672589	17747272	13849426	17657958	4038751	4059091	5394845	4610166	5130069	4430090	4255960	3769821	4793623	6095901	171707459	146299560	186038204	224533004	177272624
512	1.07_265.25	265.253	1.066	[M+H-H2O]+	MSI 2	biogenic amines	cis-Vaccenic acid	UWHZIFQPPBDJPM-FPLPWBNLSA-N	282.462	C18H34O2	CCCCCC/C=C\CCCCCCCCCC(=O)O	5282761	HMDB0003231		LMFA01030076	DB04801		CHEBI:50464		Organic compounds	Lipids and lipid-like molecules	Fatty Acyls	Fatty acids and conjugates	Long-chain fatty acids	405256	180611	136279	222887	416662	203978	162257	170746	126869	169819	174901	170976	252698	293402	210049	260260	100894	239540	272755	21164	2579300	2329724	2209301	1880882	2073779
513	0.98_356.22	356.223	0.976	[M+H]+	MSI 2	biogenic amines	(2E,4E,6E)-11-(1,3-Benzodioxol-5-yl)-N-(2-methylpropyl)undeca-2,4,6-trienamide	ITXVWRWWWSDXOY-HNZFQPFYSA-N	355.215	C22H29NO3	CC(C)CNC(=O)/C=C/C=C/C=C/CCCCC1=CC2=C(C=C1)OCO2	124875718								Organic compounds	Organoheterocyclic compounds	Benzodioxoles		Benzodioxoles	35341	11818	22679	97259	110058		16789	23407	31745	31543	55395	62992	69755	101229	59927	64995	71641	158739	71545
514	4.62_397.35	397.347	4.624	[M+H]+	MSI 2	lipidomics	ST 28:3;O	DNVPQKQSNYMLRS-UHFFFAOYSA-N	396.649	C28H44O	CC(C)C(C)C=CC(C)C1CCC2C1(CCC3C2=CC=C4C3(CCC(C4)O)C)C	247705								Organic compounds	Lipids and lipid-like molecules	Sterol lipids	Ergostane steroids	Ergosterols and derivatives	149654	166746	160253	118624	169504	142851	143545	110936	147530	155002	174980	184147	278143	136520	167411	187452	195209	139671	173723	206449	1430076	1393230	1231646	1234450	1229420
515	1.13_359.19	359.194	1.129	[M+2H]2+	MSI 2	polyphenols	Val-Glu-Pro-Ile-Pro-Tyr	ZQOILFFBJUNGRA-NMVUUJPQSA-N	716.823	C35H52N6O10	CC[C@H](C)[C@@H](C(=O)N1CCC[C@H]1C(=O)N[C@@H](CC2=CC=C(C=C2)O)C(=O)O)NC(=O)[C@@H]3CCCN3C(=O)[C@H](CCC(=O)O)NC(=O)[C@H](C(C)C)N	125253								Organic compounds	Organic acids and derivatives	Carboxylic acids and derivatives	Amino acids, peptides, and analogues	Peptides	376009	295861	412650	210469	356267	598094	118223	528356	273413	361137	676564	839722	621842	626330	752018	631258	712867	713607	708246	540228	16749	16125	9122	27351	26142
516	1.56_262.12	262.119	1.559	[M+H]+	MSI 2	polyphenols	Trp-Gly	UYKREHOKELZSPB-JTQLQIEISA-N	261.277	C13H15N3O3	C1=CC=C2C(=C1)C(=CN2)C[C@@H](C(=O)NCC(=O)O)N	7009666						CHEBI:74870		Organic compounds	Organic acids and derivatives	Carboxylic acids and derivatives	Amino acids, peptides, and analogues	Peptides					6856					6405	20090		14119			8208					128878	172109	106120	206314	196396
517	8.28_194.05	194.045	8.284	[M-H]-	MSI 2	biogenic amines	Salicyluric acid	ONJSZLXSECQROL-UHFFFAOYSA-N	195.172	C9H9NO4	C1=CC=C(C(=C1)C(=O)NCC(=O)O)O	10253	HMDB0000840	C07588				CHEBI:9008		Organic compounds	Benzenoids	Benzene and substituted derivatives	Benzoic acids and derivatives	Benzamides	57152	71217	57681	66732	56893	78052	107634	55871	78859	73442	239458	220904	298903	237299	272472	290863	234375	253836	201496	279779	7852	9606	13616	6089	10748
518	5.19_229.14	229.144	5.191	[M+H]+	MSI 1	polyphenols	9-methoxycarbonyldec-9-enoic acid	ZUNJWEGRDSXKIO-UHFFFAOYSA-N	228.285	C12H20O4	COC(=O)C(=C)CCCCCCCC(=O)O	23757109								Organic compounds	Lipids and lipid-like molecules	Fatty Acyls	Fatty acids and conjugates	Medium-chain fatty acids	393304	463294	521319	305507	478396	748253	202253	656988	349182	371400	1053982	1351001	891580	960330	1180482	949558	1067700	1082697	986477	748635	64000	81851	32506	68126	43782
519	1.07_283.26	283.263	1.066	[M+H]+	MSI 2	biogenic amines	trans-Vaccenic acid	UWHZIFQPPBDJPM-BQYQJAHWSA-N	282.462	C18H34O2	CCCCCC/C=C/CCCCCCCCCC(=O)O	5281127	HMDB0240219	C08367	LMFA01030077			CHEBI:28727		Organic compounds	Lipids and lipid-like molecules	Fatty Acyls	Fatty acids and conjugates	Long-chain fatty acids	2374811	991033	866271	1351586	2221844	1143200	1153025	1007311	873158	1036460	1152429	1054753	1488372	1630476	1051096	1377040	640018	1453927	1548900	275146	14558325	12974297	13075888	11431665	11775646
520	6.86_728.62	728.622	6.856	[M+NH4]+	MSI 2	lipidomics	SE 24:1;O4/22:2	MFNMRKDNUUZDND-UHFFFAOYSA-N												Organic compounds	Lipids and lipid-like molecules	Sterol lipids	Steroid esters	SE	13306	22143	6492	9838	5410	7447	10036	4977	14586	14935	60271	46821	115248		89009	55670	66820	68392	88776	90214	158174	68327	163497	138042	195858
521	1.81_466.35	466.353	1.807	[M+NH4]+	MSI 2	lipidomics	SE 24:1;O4/3:0	HVNRPHIMJIMKOD-UHFFFAOYSA-N												Organic compounds	Lipids and lipid-like molecules	Sterol lipids	Steroid esters	SE	205033	197745	169371	171807	218911	228947	229399	182784	246548	217723	127215	174644	274268	233803	159166	189595	222598	181112	179005	213069	9814	40129	13917	15976
522	9.35_897.69_9.35_892.74	897.693_892.7394	9.35_9.348	[M+Na]+_[M+NH4]+	MSI 2	lipidomics	TG 54:8|TG 18:2_18:3_18:3	IMPMCCKWZKDAGE-UHFFFAOYSA-N	874.705	C57H94O6	CCCCCC=CCC=CCCCCCCCC(=O)OCC(COC(=O)CCCCCCCC=CCC=CCC=CCC)OC(=O)CCCCCCCC=CCC=CCC=CCC	74412275								Organic compounds	Lipids and lipid-like molecules	Glycerolipids	Triradylcglycerols	TG	252219815	188649267	487755475	140077393	607141954	241380737	786724824	400247480	335296301	255781974	27387996	18700076	260384108	114854243	29018063	36367854	74150045	21854302	44452382	49648110	51169758	27051214	265532609	26063604	30533080
523	8.34_210.07	210.074	8.34	[M+Na]+	MSI 2	biogenic amines	Ethyl 2-acetamido-3-oxobutanoate	YUXXFBQECDBUIB-UHFFFAOYSA-N	187.193	C8H13NO4	CCOC(=O)C(C(=O)C)NC(=O)C	224840								Organic compounds	Organic acids and derivatives	Carboxylic acids and derivatives	Amino acids, peptides, and analogues	Amino acids and derivatives	34224	38010	32850	28401	18303	58521	56481	31147	117883	131464	87790	191027	155328	226489	357828	91627	102480	87365	67488	70191	703403	617744	579114	596195	758231
524	6.00_125.10	125.096	5.999	[M+H-C2H8O2]+	MSI 2	polyphenols	Ethyl 3-hydroxyoctanoate	VGWUJHSTGYCXQQ-UHFFFAOYSA-N	188.264	C10H20O3	CCCCCC(CC(=O)OCC)O	110975	HMDB0041600							Organic compounds	Lipids and lipid-like molecules	Fatty Acyls	Fatty alcohols	Fatty alcohols	84337	191237	191980	99422	121474	250559	168353	178501	70715	400022	121609	118634	112242	130773	249427	170195	105757	149764	181099	102855	856615	1178233	2014968	1575587	1269882
525	6.88_473.40	473.4	6.878	[M+H]+	MSI 2	polyphenols	.alpha.-Tocopheryl acetate	ZAKOWWREFLAJOT-CEFNRUSXSA-N	472.744	C31H52O3	CC1=C(C(=C(C2=C1O[C@](CC2)(C)CCC[C@H](C)CCC[C@H](C)CCCC(C)C)C)OC(=O)C)C	86472		C13202			31097	CHEBI:32321		Organic compounds	Lipids and lipid-like molecules	Prenol lipids	Quinone and hydroquinone lipids	Vitamin E compounds	4870	5681	4273	4392	620		5962	8639		4160			7770								5326	3546	118804	121127	162744
526	3.35_328.16	328.156	3.355	[M+NH4]+	MSI 1	polyphenols	Boldine	LZJRNLRASBVRRX-ZDUSSCGKSA-N	327.375	C19H21NO4	CN1CCC2=CC(=C(C3=C2[C@@H]1CC4=CC(=C(C=C43)OC)O)OC)O	10154		C09365				CHEBI:3148		Organic compounds	Alkaloids and derivatives	Aporphines		Aporphines	67150	63410	94975	39494	74589	124016	38062	125233	41716	86490	149207	195988	104124	126949	155893	139079	144037	159244	127299	115354	12500	8742		8716
527	1.62_230.12	230.118	1.621	[M+H]+	MSI 2	polyphenols	Ethyl 2-methyl-4-phenyl-1H-pyrrole-3-carboxylate	ITWKYSAIWTTWLJ-UHFFFAOYSA-N	229.275	C14H15NO2	CCOC(=O)C1=C(NC=C1C2=CC=CC=C2)C	230431								Organic compounds	Organoheterocyclic compounds	Pyrroles	Substituted pyrroles	Phenylpyrroles	35228	67571	52505	36862	66162	78238	66244	136372	36538	65302	17549	34001	8551	9906	4533	23388	41352	40010	8754	18417	326049	379228	327716	481537	412427
528	2.73_345.17	345.171	2.729	[M+H-H2O]+	MSI 2	polyphenols	2,3-Bis[(4-hydroxy-3-methoxyphenyl)methyl]butane-1,4-diol	PUETUDUXMCLALY-UHFFFAOYSA-N	362.418	C20H26O6	COC1=C(C=CC(=C1)CC(CO)C(CC2=CC(=C(C=C2)O)OC)CO)O	586372								Organic compounds	Lignans, neolignans and related compounds	Dibenzylbutane lignans	Dibenzylbutanediol lignans	Dibenzylbutanediol lignans	319459	323162	520710	291275	413644	525859	173544	525710	250858	316833	1208995	1566391	949634	1063220	1417019	1125059	1128266	1442694	1201952	940004	76017	90110	65173	29144	80105
529	3.81_387.33	387.327	3.808	[M-H]-	MSI 2	lipidomics	Hexacosatetraenoic acid	MHWUJHJVQVPKHD-KVKDIOEXSA-N	388.627	C26H44O2	CCCCCCCCCCCCCCCCC/C=C/C=C/C=C/C=C/C(=O)O	6439884								Organic compounds	Lipids and lipid-like molecules	Fatty Acyls	Fatty acids and conjugates	Very long-chain fatty acids	10560		4503			4822	5624	9842	4424	3477	37847	30174	30265	43762	45937	44107	52421	50170	37071	48020	233549	260334	213468	221535	197102
530	11.72_696.66_11.71_701.62	696.6650_701.6210	11.719_11.715	[M+NH4]+_[M+H]+	MSI 2	lipidomics	CE 20:1	OWTYWMJVQZQWFH-UQPFUGTCSA-N	679.155	C47H82O2	CCCCCCCC/C=C\CCCCCCCCCC(=O)O[C@H]1CC[C@@]2([C@H]3CC[C@]4([C@H]([C@@H]3CC=C2C1)CC[C@@H]4[C@H](C)CCCC(C)C)C)C	16061337			LMST01020011					Organic compounds	Lipids and lipid-like molecules	Sterol lipids	Steroid esters	Cholesteryl esters	45382	133436	66970	103987	155531	77594	74923	112040	78810	55579	88892	119568	124586	24271	116631	132194	100712	144506	163449	137927	1212037	2179622	1160395	1150713	1552898
531	8.04_290.14	290.135	8.041	[M+H]+	MSI 2	biogenic amines	Benzoyl ecgonine	GVGYEFKIHJTNQZ-UHFFFAOYSA-N	289.327	C16H19NO4	CN1C2CCC1C(C(C2)OC(=O)C3=CC=CC=C3)C(=O)O	2340								Organic compounds	Benzenoids	Benzene and substituted derivatives	Benzoic acids and derivatives	Benzoic acid esters	16619333	18210431	13483740	14034254	13462758	12539866	18844489	15200046	18502894	13455449	25362375	29306759	29374942	27800203	25824398	24229345	23273761	21526884	24440613	26261007	2018717	1686310	1662122	1599524	2149024
532	11.75_670.65_11.75_675.61	670.6503_675.6052	11.747_11.747	[M+NH4]+_[M+Na]+	MSI 1	lipidomics	CE 18:0	XHRPOTDGOASDJS-UHFFFAOYSA-N	653.117	C45H80O2	CCCCCCCCCCCCCCCCCC(=O)OC1CCC2(C3CCC4(C(C3CC=C2C1)CCC4C(C)CCCC(C)C)C)C	5013207								Organic compounds	Lipids and lipid-like molecules	Sterol lipids	Steroid esters	Cholesteryl esters	75509	86443	98175	91389	126512	98477	101155	85142	100976	62232	97257	103640	178442	104872	116253	124521	109676	153180	146621	153324	1280026	1293737	1100199	1064610	1374129
533	3.95_717.54	717.543	3.946	[M+Na]+	MSI 2	lipidomics	DG 42:7	AIRGHYYBGWIEJK-UHFFFAOYSA-N												Organic compounds	Lipids and lipid-like molecules	Glycerolipids	Diradylglycerols	DG	23715	28173	45559	27281	52068	52586	27654	54200	56823	52200	97867	101579	92100	112021	93995	94144	84105	115607	94044	94341	617042	575458	662368	506445	618531
534	8.83_864.71	864.712	8.833	[M+NH4]+	MSI 2	lipidomics	TG 52:8|TG 16:2_18:3_18:3	CVTYUBZRISQRAD-UHFFFAOYSA-N												Organic compounds	Lipids and lipid-like molecules	Glycerolipids	Triradylcglycerols	TG	57546	18548	111487	11878	150727	71487	534832	92055	69526	34054			129746								7249		77659
535	5.94_315.23	315.233	5.939	[M+H-CH8O3]+	MSI 1	polyphenols	5-(8,11,14-pentadecatrienyl)resorcinol	OOXBEOHCOCMKAC-AOSYACOCSA-N	314.462	C21H30O2	C=CC/C=C/C/C=C/CCCCCCCC1=CC(=CC(=C1)O)O	6440219	HMDB0038533							Organic compounds	Benzenoids	Phenols	Benzenediols	Resorcinols	309434	647002	747540	371240	532266	903125	498422	844690	347866	542660	52077	102741	32656	106782	126577	127142	100235	134002	120720	74911	4752078	5448175	6189978	6262008	7446799
536	2.53_348.29	348.287	2.529	[M+H]+	MSI 2	lipidomics	Arachidonoyl-EA	LGEQQWMQCRIYKG-DOFZRALJSA-N	347.536	C22H37NO2	CCCCC/C=C\C/C=C\C/C=C\C/C=C\CCCC(=O)NCCO	5281969	HMDB0004080	C11695	LMFA08040001			CHEBI:2700	CPD-7598	Organic compounds	Organic nitrogen compounds	Organonitrogen compounds	Amines	Alkanolamines	409448	455167	401058	373965	453281	412687	420447	281533	391918	429585	1149817	1166388	1362451	1470541	1163726	1105946	1063783	1184174	1107316	1286036	4012961	4873900	3937234	3862566	4088936
537	3.93_451.34_3.93_446.38	451.3395_446.3841	3.926_3.927	[M+Na]+_[M+NH4]+	MSI 2	lipidomics	DG 22:0|DG 10:0_12:0	ORQVFHQDXPONHR-UHFFFAOYSA-N												Organic compounds	Lipids and lipid-like molecules	Glycerolipids	Diradylglycerols	DG	915823	1121632	857321	728831	852620	733765	890822	671312	699736	803409	134412	214604	185605	181186	158861	137069	216742	129909	160648	200728	4710874	6633333	7605072	7739411	6366351
538	5.54_201.06	201.055	5.535	[M+H-H2O]+	MSI 2	polyphenols	Piperic acid	RHBGITBPARBDPH-ZPUQHVIOSA-N	218.206	C12H10O4	C1OC2=C(O1)C=C(C=C2)/C=C/C=C/C(=O)O	5370536						CHEBI:37316		Organic compounds	Organoheterocyclic compounds	Benzodioxoles		Benzodioxoles	474659	688312	443706	457788	573965	349190	393620	697391	224025	651837	566675	568714	417028	725222	670124	522341	489236	567981	486707	558752	75926	13940	275832	58713	31109
539	6.01_598.50	598.498	6.007	[M+CH3COO]-	MSI 2	lipidomics	Cer 33:1;O3|Cer 17:1;O2/16:0;O	MRCZDNIYJMMBIJ-UHFFFAOYSA-N												Organic compounds	Lipids and lipid-like molecules	Sphingolipids	Ceramides	Long-chain ceramides	435158	413863	413900	465086	485187	510180	409985	453768	420786	409177	673918	647616	892987	652876	531508	615031	603433	498974	631783	681615	3719727	3546885	2904536	3077099	3507990
540	1.90_303.23	303.233	1.896	[M-H]-	MSI 1	lipidomics	FA 20:4 (arachidonic acid)	YZXBAPSDXZZRGB-DOFZRALJSA-N	304.468	C20H32O2	CCCCC/C=C\C/C=C\C/C=C\C/C=C\CCCC(=O)O	444899	HMDB0001043	C00219	LMFA01030001		43955	CHEBI:15843		Organic compounds	Lipids and lipid-like molecules	Fatty Acyls	Fatty acids and conjugates	Long-chain fatty acids	2555696	2723958	2272042	2455249	2626825	2357873	2435377	2726176	2262415	2311120	6619496	7666254	8004735	9299767	7245900	6387796	8253714	6004014	6560161	7992602	34916031	39499493	32139962	35226309	30810143
541	3.96_625.48	625.481	3.956	[M+Na]+	MSI 2	lipidomics	DG 35:4	XYBWGQNIADQACM-UHFFFAOYSA-N												Organic compounds	Lipids and lipid-like molecules	Glycerolipids	Diradylglycerols	DG			4553		10444	8594	4409		13327		8728	33418	35156		6139	7886	26630	11184	19111	17208	102291	83393	81439	49201	79591
542	9.76_873.69_9.76_868.74	873.6936_868.739	9.763_9.762	[M+Na]+_[M+NH4]+	MSI 2	lipidomics	TG 52:6|TG 16:0_18:3_18:3	GLKWVCJIQVMKME-UHFFFAOYSA-N												Organic compounds	Lipids and lipid-like molecules	Glycerolipids	Triradylcglycerols	TG	134866016	109876558	187991532	65695371	233077472	128934796	434025655	184787207	155311384	78075629	11598902	11572725	126080803	68773844	16017311	13432699	33838646	8928505	21136914	31267763	34137301	10231777	119558832	9681017	15471527
543	5.46_332.19	332.189	5.458	[M+K]+	MSI 3	polyphenols	ANISOCOUMARIN H	VNADFOGBKXRWGC-RIYZIHGNSA-N	314.376	C19H22O4	CC(=CC(C/C(=C/COC1=CC2=C(C=C1)C=CC(=O)O2)/C)O)C	14376449								Organic compounds	Lipids and lipid-like molecules	Prenol lipids	Terpene lactones	Terpene lactones	12947	19591	7675	5629	22266	7437	4360	23579	9788	14716	58624	47337	28929	36149	34826	28097	29960	44197	48337	28748	149250	247573	111169	169817	213362
544	3.82_706.54	706.54	3.821	[M-H]-	MSI 2	lipidomics	SL 42:4;O	NUKVWIWGIZWRIU-UHFFFAOYSA-N												Organic compounds	Lipids and lipid-like molecules	Sphingolipids	Sphingoid bases	SL	389799	396062	385938	368308	377393	440909	422491	670943	442351	444517	2206745	2200850	2219066	2049087	1913793	2082971	1746629	1860638	1651577	1787671	54761	41408	75908	146772	61429
545	5.20_368.24	368.244	5.195	[M+H]+	MSI 3	polyphenols	5-(4-carboxy-3-methylbutyl)-5,6,8a-trimethyl-3-oxo-4a,6,7,8-tetrahydro-4H-naphthalene-1-carboxylic acid	XKXZAYIPFRBKHT-UHFFFAOYSA-N	350.45	C20H30O5	CC1CCC2(C(C1(C)CCC(C)CC(=O)O)CC(=O)C=C2C(=O)O)C	56776388								Organic compounds	Lipids and lipid-like molecules	Prenol lipids	Diterpenoids	Colensane and clerodane diterpenoids	87518	97843	125378	53427	93484	147911	29278	130929	63241	96358	168270	179647	114449	138351	158798	147691	149443	138270	137130	89875	5504	15183	10763	14925
546	4.01_669.45	669.448	4.013	[M+Na]+	MSI 2	lipidomics	DG 39:10	DUFUETJUZVZTLR-UHFFFAOYSA-N												Organic compounds	Lipids and lipid-like molecules	Glycerolipids	Diradylglycerols	DG	130687	143181	211610	75589	228876	63045	97714	97215	86570	348327	33364		63365	38820	6543	114095	4675	12131	4105	39703		12026	8635	10485	27181
547	4.67_222.15	222.149	4.666	[M+Na]+	MSI 2	biogenic amines	tert-Butyl cyclohexylcarbamate	DNSTUAQHBFISRZ-UHFFFAOYSA-N	199.29	C11H21NO2	CC(C)(C)OC(=O)NC1CCCCC1	300728								Organic compounds	Organic acids and derivatives	Carboxylic acids and derivatives	Amino acids, peptides, and analogues	Amino acids and derivatives	1342035	1780193	1153618	1245295	1109761	1445864	1917034	1320680	1419566	1316698	3170971	3175975	3602599	3308316	3217386	2954170	3535192	3278328	2890964	3121660	220377	168008	257697	218346	264850
548	5.33_292.19	292.192	5.328	[M+H]+	MSI 3	polyphenols	(4aS)-6,7-dihydroxy-1,1,4a-trimethyl-3,4,10,10a-tetrahydro-2H-phenanthren-9-one	JMBKXUYCBVKSSY-OMOCHNIRSA-N	274.355	C17H22O3	C[C@]12CCCC(C1CC(=O)C3=CC(=C(C=C23)O)O)(C)C	14167551								Organic compounds	Lipids and lipid-like molecules	Prenol lipids	Diterpenoids	Diterpenoids	111375	171988	190718	72535	181554	186435	70420	212099	102665	126598	173082	182362	101008	113526	154073	181129	135269	156516	130976	120664	27550	32053	8143	6791	26799
549	4.04_170.09	170.093	4.043	[M+H]+	MSI 2	biogenic amines	1-Methylhistidine	BRMWTNUJHUMWMS-LURJTMIESA-N	169.181	C7H11N3O2	CN1C=C(N=C1)C[C@@H](C(=O)O)N	7020397	HMDB0000001			DB04151		CHEBI:50599		Organic compounds	Organic acids and derivatives	Carboxylic acids and derivatives	Amino acids, peptides, and analogues	Amino acids and derivatives	259438	234695	235444	216086	172088	181943	196915	180679	224078	198309	325079	313981	332206	315455	185407	318683	313992	258578	215612	299043	1989658	1505181	2049138	1841643	2211425
550	7.45_411.22	411.221	7.452	[M+H]+	MSI 2	biogenic amines	Risperidone	RAPZEAPATHNIPO-UHFFFAOYSA-N	410.485	C23H27FN4O2	CC1=C(C(=O)N2CCCCC2=N1)CCN3CCC(CC3)C4=NOC5=C4C=CC(=C5)F	5073	HMDB0005020	D00426		DB00734				Organic compounds	Organoheterocyclic compounds	Pyridopyrimidines		Pyridopyrimidines	7717	8321	3208		4262	6727	4635	3345	5819	2718	11556	32072	35426	61181	17832	41353	43353	24896	14416	21240	105506	106088	138143	126821	130213
551	5393	241	289520	[M]*+	MSI 1	primary metabolism	Methanolphosphate	CAAULPUQFIIOTL-UHFFFAOYSA-N	112.022	CH5O4P	COP(=O)(O)O	13130	HMDB0061711				31673	CHEBI:340824		Organic compounds	Organic acids and derivatives	Organic phosphoric acids and derivatives	Phosphate esters	Alkyl phosphates	69899	78909	75883	75407	73524	78477	83098	78723	74925	74350	42021	66339	66271	77173	69057	76405	59826	85452	57944	61695	19816	19244	22155	24948	15632
552	5.13_106.07	106.069	5.132	[M+NH4]+	MSI 3	biogenic amines	3-Methylthiopropylamine	KKYSBGWCYXYOHA-UHFFFAOYSA-N	105.203	C4H11NS	CSCCCN	77743		C03354				CHEBI:16696		Organic compounds	Organosulfur compounds	Thioethers	Dialkylthioethers	Dialkylthioethers	103101	132340	88459	87046	59598	95078	145095	102327	104737	113833	280983	292876	286145	294780	276192	284154	221419	276926	262195	259504	10959	7511	17437	9119	15161
553	0.74_271.23	271.228	0.737	[M-H]-	MSI 2	lipidomics	FA 16:0;(2OH)	JGHSBPIZNUXPLA-UHFFFAOYSA-N	272.424	C16H32O3	CCCCCCCCCCCCCCC(C(=O)O)O	92836			LMFA01050047			CHEBI:65101		Organic compounds	Lipids and lipid-like molecules	Fatty Acyls	Fatty acids and conjugates	Long-chain fatty acids	26569839	22268562	23258355	20699990	20778579	24802001	19135846	27260635	20800926	19905824	103426749	89094757	111574622	101313852	92767743	97778045	91665570	88543254	67888937	111565705	404620669	361330391	364264823	359427166	359230784
554	9.84_815.75	815.746	9.842	[M+Na]+	MSI 2	lipidomics	DG 48:0	BUKUULLYWINZRJ-UHFFFAOYSA-N												Organic compounds	Lipids and lipid-like molecules	Glycerolipids	Diradylglycerols	DG	26185	30730	41599	57345	37980	35030	27440	27659	54073	46390	43964	73311	41801		48468	31694	38866	43669	69731	65508	375667	397935	335085	302960	405444
555	2.43_297.18	297.182	2.431	[M+H-H2O]+	MSI 2	polyphenols	Kahweol	JEKMKNDURXDJAD-HWUKTEKMSA-N	314.419	C20H26O3	C[C@@]12C=CC3=C([C@H]1CC[C@]45[C@H]2CC[C@H](C4)[C@](C5)(CO)O)C=CO3	114778							CPD-16468	Organic compounds	Organoheterocyclic compounds	Naphthofurans		Naphthofurans	1069234	965638	1223716	635817	1099553	1693040	400845	1548252	785311	1071350	2190775	2599940	1648017	1896274	2411569	1929609	2196590	2297155	2235405	1717295	143302	163653	106132	182508	148072
556	4.22_299.13_4.22_281.12	299.1287_281.1182	4.22_4.22	[M+H]+_[M+H-H2O]+	MSI 2	polyphenols	Enterolactone	HVDGDHBAMCBBLR-WMLDXEAASA-N	298.334	C18H18O4	C1[C@@H]([C@H](C(=O)O1)CC2=CC(=CC=C2)O)CC3=CC(=CC=C3)O	10685477								Organic compounds	Lignans, neolignans and related compounds	Furanoid lignans	Tetrahydrofuran lignans	9,9'-epoxylignans	7370444	8712735	10342383	5525558	8996867	12516407	6416606	12338511	5860762	9275578	12261148	14112523	9087774	11353356	15777380	13331458	12416381	13277949	12042664	9731989	993117	1191615	881020	1238098	1142962
557	6.12_373.24	373.236	6.123	[M+H]+	MSI 2	polyphenols	Xysmalogenin	ZICGJBPBLVXOBM-MITUEXOSSA-N	372.499	C23H32O4	C[C@]12CC[C@@H](CC1=CC[C@@H]3[C@@H]2CC[C@]4([C@@]3(CC[C@@H]4C5=CC(=O)OC5)O)C)O	12302371								Organic compounds	Lipids and lipid-like molecules	Sterol lipids	Steroid lactones	Steroid lactones	302428	870945	780232	427649	449946	681291	359653	552300	330284	397170	27909	33592	106458	115288	49342	73914	82849	63222	118769	53779	5040496	4720569	7363608	6521145	7964291
558	10.00_377.18	377.178	9.999	[M+H]+	MSI 2	biogenic amines	Ser-Asp-Arg	CNIIKZQXBBQHCX-FXQIFTODSA-N	376.171	C13H24N6O7	C(C[C@@H](C(=O)O)NC(=O)[C@H](CC(=O)O)NC(=O)[C@H](CO)N)CN=C(N)N	145457687								Organic compounds	Organic acids and derivatives	Carboxylic acids and derivatives	Amino acids, peptides, and analogues	Peptides	43283	18376	21962	15192	27566	22825	25417	12829	21982	7867	39575	28514	34863	31522	35629	19588	35907	41279	16475	51103	313118	219580	194341	235661	276478
559	5.33_295.17	295.166	5.334	[M+H-C6H7N]+	MSI 2	biogenic amines	5-Heptenoic acid, 7-[(1S,2R,3R,4R)-3-[[2-[(phenylamino)carbonyl]hydrazinyl]methyl]-7-oxabicyclo[2.2.1]hept-2-yl]-, (5Z)-	RJNDVCNWVBWHLY-YVUOLYODSA-N	387.473	C21H29N3O4	C1C[C@@H]2[C@H]([C@H]([C@H]1O2)C/C=C\CCCC(=O)O)CNNC(=O)NC3=CC=CC=C3	5311448								Organic compounds	Benzenoids	Benzene and substituted derivatives	N-phenylureas	N-phenylureas	243001	291363	206603	225191	198711	248886	341338	223789	240047	255677	541126	527494	469044	542190	505265	482818	493680	499550	435216	479186	43383	20784	27345	26828	32384
560	5.93_160.13	160.133	5.933	[M+H-C2H2O]+	MSI 2	biogenic amines	2-Acetamidooctanoic acid	JJGNMSOJTSABGA-UHFFFAOYSA-N	201.263	C10H19NO3	CCCCCCC(C(=O)O)NC(=O)C	95555	HMDB0059745							Organic compounds	Organic acids and derivatives	Carboxylic acids and derivatives	Amino acids, peptides, and analogues	Amino acids and derivatives	2619431	2689369	1998205	2230165	1886260	2141526	3482796	2235772	2473919	2398848	6151402	6047586	6657868	5696991	5776582	5705354	6035642	5735293	5440699	5539560	367844	292247	377780	346847	504845
561	4.40_570.54_4.40_592.53	570.5450_592.5283	4.399_4.397	[M+H]+	MSI 2	lipidomics	Cer 35:0;O3|Cer 17:0;O2/18:0;O	UZCJGKAZJTWPHZ-UHFFFAOYSA-N	569.538	C35H71NO4	CCCCCCCCCCCCCCCCC(C(=O)NC(CO)C(CCCCCCCCCCCCCC)O)O	138276777								Organic compounds	Lipids and lipid-like molecules	Sphingolipids	Ceramides	Long-chain ceramides	34795	49457	49471	40248	45138	50605	45567	34307	37420	46774	101321	94347	135220	56209	75273	88359	104772	81948	143806	117424	441392	206516	333264	320270	404121
562	7.39_184.11	184.108	7.391	[M+H]+	MSI 2	biogenic amines	N,N-Dimethylhistidine	IMOBSLOLPCWZKQ-ZETCQYMHSA-N	183.208	C8H13N3O2	CN(C)[C@@H](CC1=CN=CN1)C(=O)O	440274		C04259				CHEBI:16029	NALPHANALPHA-DIMETHYL-L-HISTIDINE	Organic compounds	Organic acids and derivatives	Carboxylic acids and derivatives	Amino acids, peptides, and analogues	Amino acids and derivatives	370132	427722	289105	288693	285487	316871	487254	295641	293823	313412	928190	891393	795892	917797	870258	1022505	866474	861095	705595	737303	67575	27814	41519	36930	53896
563	1.93_335.26	335.259	1.93	[M-H]-	MSI 2	lipidomics	FA 21:3;O	CRDFNKIUQSIOBS-UHFFFAOYSA-N												Organic compounds	Lipids and lipid-like molecules	Fatty Acyls	Fatty acids and conjugates	Fatty acids	1832651	2253287	1675634	2118355	1934414	1952210	1804357	1950819	1659335	1766160	4201654	4779455	5983077	5456844	4785406	3548474	4888375	3519486	4434274	6151658	11908714	13539068	13320799	10984111	11348620
564	7.50_123.06_7.50_255.10	123.0553_255.0977	7.505_7.501	[Cat-C5H8O4]+_[Cat]+	MSI 2	biogenic amines	Nicotinamide riboside	JLEBZPBDRKPWTD-TURQNECASA-O	255.248	C11H15N2O5	C1=CC(=C[N+](=C1)[C@H]2[C@@H]([C@@H]([C@H](O2)CO)O)O)C(=O)N	439924	HMDB0000855	C03150				CHEBI:15927	NICOTINAMIDE_RIBOSE	Organic compounds	Organic oxygen compounds	Organooxygen compounds	Carbohydrates and carbohydrate conjugates	Glycosyl compounds	332293	314967	276419	305301	287121	349111	439127	316053	349345	342539	280039	284873	380847	288278	267838	357408	277301	281461	241852	280875	4261867	3686508	4257368	3796281	4449517
565	5.32_700.57	700.572	5.32	[M+H]+	MSI 2	lipidomics	HexCer 34:1;2O|HexCer 18:1;2O/16:0	VJLLLMIZEJJZTE-UHFFFAOYSA-N	700.043	C40H77NO8	CCCCCCCCCCCCCCCC(=O)NC(COC1C(C(C(C(O1)CO)O)O)O)C(C=CCCCCCCCCCCCCC)O									Organic compounds	Lipids and lipid-like molecules	Sphingolipids	Glycosphingolipids	HexCer	128241	215178	149860	133943	120647	118695	190321	120496	174520	143849	363577	337443	338678	183621	302820	315493	318931	336329	305197	339540	1228362	1057133	1644906	1284765	1335855
566	5.29_635.46_5.29_630.51	635.4643_630.5095	5.285_5.286	[M+Na]+_[M+NH4]+	MSI 2	lipidomics	DG 36:6|DG 18:3_18:3	MIZLVTMVPBPVTL-UHFFFAOYSA-N												Organic compounds	Lipids and lipid-like molecules	Glycerolipids	Diradylglycerols	DG	67977852	101627486	144758199	71936386	180899586	102749386	173983620	112082004	112749201	102392593	37966563	34525611	171263043	91826104	37530740	55219031	99650854	30773164	54735089	71779223	23365805	10339325	121984025	12004430	18351124
567	9.88_945.83	945.829	9.882	[M+Na]+	MSI 2	lipidomics	TG O-58:5|TG O-22:3_18:1_18:1	UIXSEMXJWIWLCT-UHFFFAOYSA-N												Organic compounds	Lipids and lipid-like molecules	Glycerolipids	Triradylcglycerols	TG	5391	20891	20050	10034	24995	13019	11888	12248	17415	7806	3923				5711						219933	114595	168691	205818	212850
568	7.90_184.07	184.072	7.899	[M+H]+	MSI 2	biogenic amines	m-Fluoro-DL-phenylalanine	VWHRYODZTDMVSS-UHFFFAOYSA-N	183.18	C9H10FNO2	C1=CC(=CC(=C1)F)CC(C(=O)O)N	9976								Organic compounds	Organic acids and derivatives	Carboxylic acids and derivatives	Amino acids, peptides, and analogues	Amino acids and derivatives	57143	49118	32093	34290	34269	50552	85381	53731	22261	51526	138011	156144	148701	132633	139783	130317	142969	139847	121932	121399	893682	785402	812220	748998	899073
569	9.76_895.76	895.757	9.758	[M+Na]+	MSI 2	lipidomics	TG 53:2|TG 16:0_18:1_19:1	IDUAWMUEKRFTEE-UHFFFAOYSA-N												Organic compounds	Lipids and lipid-like molecules	Glycerolipids	Triradylcglycerols	TG	115816165	118518455	210660287	64866329	317577507	110486410	300584371	182103316	152242562	88349069	11091980	10551137	105376354	49481065	16607854	15730696	29444271	7992077	16677148	29924248	25931001	22581379	82173577	17416573	19951883
570	2.95_307.26	307.264	2.951	[M-H]-	MSI 1	lipidomics	FA 20:2 (eicosadienoic acid)	XSXIVVZCUAHUJO-UHFFFAOYSA-N	308.499	C20H36O2	CCCCCC=CCC=CCCCCCCCCCC(=O)O	3208								Organic compounds	Lipids and lipid-like molecules	Fatty Acyls	Fatty acids and conjugates	Long-chain fatty acids	12958714	13180724	13374602	15840683	13546698	14943574	12003319	15852313	11961196	11183567	27588159	36696193	48304617	45312434	40922833	34801177	44997173	34094072	33960152	46752798	160028166	155243499	129976623	169236822	137526620
571	7.18_334.28	334.275	7.177	[M+H]+	MSI 1	polyphenols	4-[(E)-3-hydroxy-8,10-dimethyl-2-(methylamino)dodec-6-enyl]phenol	RNCWKUCWPBNWOH-SOFGYWHQSA-N	333.509	C21H35NO2	CCC(C)CC(C)/C=C/CCC(C(CC1=CC=C(C=C1)O)NC)O	45359323								Organic compounds	Benzenoids	Benzene and substituted derivatives	Phenethylamines	Amphetamines and derivatives	165477	170539	211971	109647	176819	272422	116857	269407	142942	236268	323142	373076	216328	303952	345819	295678	288498	358198	303324	277034	1735946	2097639	1416440	2454707	2000717
572	6.11_326.31	326.306	6.111	[M+H]+	MSI 2	polyphenols	Oleoyl-EA	BOWVQLFMWHZBEF-KTKRTIGZSA-N	325.53	C20H39NO2	CCCCCCCC/C=C\CCCCCCCC(=O)NCCO	5283454	HMDB0002088		LMFA08040015			CHEBI:71466		Organic compounds	Organic nitrogen compounds	Organonitrogen compounds	Amines	Alkanolamines	674726	1262484	1437952	687194	886982	1255121	680540	1327786	582495	847912	1851916	2495533	1553953	2334736	2518432	2303834	1915662	2801495	2049606	1767812	6535145	9084350	7752874	11087095	9806243
573	5.91_506.33	506.326	5.906	[M+H]+	MSI 2	polyphenols	Oleana-1,9(11)-dien-28-oic acid, 2-cyano-3,12-dioxo-, methyl ester	WPTTVJLTNAWYAO-KPOXMGGZSA-N	505.689	C32H43NO4	C[C@@]12CC[C@]3(CCC(C[C@H]3[C@H]1C(=O)C=C4[C@]2(CC[C@@H]5[C@@]4(C=C(C(=O)C5(C)C)C#N)C)C)(C)C)C(=O)OC	400769		D09585						Organic compounds	Organic oxygen compounds	Organooxygen compounds	Carbonyl compounds	Ketones	22415	195521	73583	36885	14246	13263	59694	26666	22806	19354		12416	35237	60254	78702	72122	19783	23333	15885	16402	114163	80269	153240	125157	218290
574	5.85_616.53_5.84_637.46	616.5301_637.4592	5.847_5.839	[M+H-H2O]+_[M+H]+	MSI 2	lipidomics	Cer 39:4;O4	IZKICIHYBSZOOG-UHFFFAOYSA-N												Organic compounds	Lipids and lipid-like molecules	Sphingolipids	Ceramides	Long-chain ceramides	1514326	2264068	1970934	1580665	2015360	1715016	1532617	2293283	2098376	1807278	799732	794328	893073	692225	735287	744250	710141	783330	982341	929926	15390050	12336260	12485123	12536377	13667845
575	9.85_835.72_9.85_830.76	835.7161_830.7603	9.854_9.851	[M+Na]+_[M+NH4]+	MSI 2	lipidomics	DG 50:4	XOYBHTCLGHMOBE-UHFFFAOYSA-N												Organic compounds	Lipids and lipid-like molecules	Glycerolipids	Diradylglycerols	DG	211174	11620	13431	24311	23408	26144	29427	42608	34392	207242	11513	7027	41290	157632	12397	30037	37354	32890	14315	23604	630181	589500	453082	591015	564719
576	5.12_691.54	691.54	5.116	[M-H]-	MSI 2	lipidomics	PE-Cer 35:0;3O|PE-Cer 18:0;2O/17:0;O	RESZGEDHBKXZKO-UHFFFAOYSA-N												Organic compounds	Lipids and lipid-like molecules	Sphingolipids	Phosphosphingolipids	PE-Cer	149808	162063	123568	128212	143339	144211	141431	147976	125008	158583	457107	439476	436049	459459	430288	371840	465426	374314	387788	520794	1545729	1333985	1659058	1390506	1339826
577	1.20_367.16	367.159	1.196	[M-H]-	MSI 2	biogenic amines	Epitestosterone sulfate	WAQBISPOEAOCOG-FZPSTPAASA-N	368.489	C19H28O5S	C[C@]12CCC3[C@H](C1CC[C@@H]2OS(=O)(=O)O)CCC4=CC(=O)CC[C@]34C	53481658	HMDB0013230							Organic compounds	Lipids and lipid-like molecules	Sterol lipids	Sulfated steroids	Sulfated steroids	24639	22363	12596	11911	17348	14939	19514	19534	12792	13688	67178	84151	93112	121894	88813	87557	72636	87449	88780	96233	204657	220811	188181	254665	239013
578	7.94_172.07	172.072	7.944	[M+H-H2O]+	MSI 2	biogenic amines	.alpha.-Guanidinoglutaric acid	RHVVRMJOHATSPD-VKHMYHEASA-N	189.169	C6H11N3O4	C(CC(=O)O)[C@@H](C(=O)O)N=C(N)N	135313		C03140				CHEBI:7246		Organic compounds	Organic acids and derivatives	Carboxylic acids and derivatives	Amino acids, peptides, and analogues	Amino acids and derivatives	7484	14663	6636	13993	6482	16210	34124	12338	14278	17418	51637	61156	70191	46895	46952	52370	41321	41778	40421	27287	250077	167738	261035	230935	250261
579	10.39_910.79_10.39_915.74	910.7856_915.741	10.394_10.393	[M+NH4]+_[M+Na]+	MSI 2	lipidomics	TG 55:6|TG 19:0_18:3_18:3	KBAPIIQCFAUULH-UHFFFAOYSA-N												Organic compounds	Lipids and lipid-like molecules	Glycerolipids	Triradylcglycerols	TG	1352491	1602560	4487466	1128622	4861267	3363320	8188070	4386868	3444212	1926429	208612	166973	2523287	964444	179875	200142	784566	197409	582867	563275	498640	130765	2073414	143990	163483
580	8.29_112.09	112.087	8.289	[M+H]+	MSI 1	biogenic amines	Histamine	NTYJJOPFIAHURM-UHFFFAOYSA-N	111.145	C5H9N3	C1=C(NC=N1)CCN	774	HMDB0000870	C00388			23125	CHEBI:18295		Organic compounds	Organic nitrogen compounds	Organonitrogen compounds	Amines	Primary amines	434807	481508	354572	388339	353781	413159	535760	385650	409317	472891	1308433	1360034	1424961	1466762	1308085	1273331	1355422	1383585	1138206	1297667	7097217	5557313	6531538	6599826	7080201
581	5.36_205.10	205.097	5.363	[M+H]+	MSI 2	biogenic amines	1-Isopropyl-1H-benzimidazole-5-carboxylic acid	SQIQIYYPWAELAC-UHFFFAOYSA-N	204.226	C11H12N2O2	CC(C)N1C=NC2=C1C=CC(=C2)C(=O)O	4712703								Organic compounds	Organoheterocyclic compounds	Benzimidazoles		Benzimidazoles	3736	25235	5984	17400	9943	11333	13125	10717	664	19602	879	21262	15973	26794	25719	41392	13531	33382	23959	12883	100326	78612	91884	92560	124866
582	1.19_203.14	203.143	1.192	[M+H-CH4O3]+	MSI 2	biogenic amines	2-((1S,3aR,4S,6S,7R,8aR)-1-Hydroxy-4,8a-dimethyloctahydro-1H-3a,6-epoxyazulen-7-yl)prop-2-enoic acid	OCDVJJQZCCOISH-WTBCFXLOSA-N	266.152	C15H22O4	C[C@H]1C[C@H]2[C@H](C[C@]3([C@@]1(O2)CC[C@@H]3O)C)C(=C)C(=O)O	75368819								Organic compounds	Organoheterocyclic compounds	Oxanes		Oxanes	18890	12961		4729	3770	8668	8513	7471	7555	3209	27804	24231	24622	24783	6367	8653	23874	33276	13338	4054	59754	46334	40256	68681	127834
583	1.04_286.14	286.144	1.036	[M+H]+	MSI 1	biogenic amines	Piperine	MXXWOMGUGJBKIW-YPCIICBESA-N	285.338	C17H19NO3	C1CCN(CC1)C(=O)/C=C/C=C/C2=CC3=C(C=C2)OCO3	638024	HMDB0029377	C03882			21805	CHEBI:28821	N-EE-PIPEROYL-PIPERIDINE	Organic compounds	Alkaloids and derivatives			Alkaloids and derivatives	15837078	21142377	9884213	6130826	10151616	9416203	11775475	6375779	8668608	7168616	10100275	12455320	11412226	21674973	5916796	7696730	8365137	14096821	8388847	2263653	1128475	1011369	1142199	841068	931290
584	11.30_694.65	694.649	11.303	[M+NH4]+	MSI 2	lipidomics	CE 20:2	REFJKOQDWJELKE-AKLGJIFXSA-N	677.139	C47H80O2	CCCCC/C=C\C/C=C\CCCCCCCCCC(=O)O[C@H]1CC[C@@]2([C@H]3CC[C@]4([C@H]([C@@H]3CC=C2C1)CC[C@@H]4[C@H](C)CCCC(C)C)C)C	16061338	HMDB0062455		LMST01020012					Organic compounds	Lipids and lipid-like molecules	Sterol lipids	Steroid esters	Cholesteryl esters	104330	75310	106140	83327	96418	90788	116280	112770	46740	116161	116834	145318	207112	65784	178963	145510	155098	164495	161143	187768	1333246	2701038	1182103	1089981	1436197
585	1.94_157.09	157.086	1.943	[M+H]+	MSI 2	biogenic amines	Dihydroterrein	LFRFNLMDZHTVHB-YUMQZZPRSA-N	156.179	C8H12O3	CCCC1=CC(=O)[C@@H]([C@H]1O)O	11040921								Organic compounds	Organic oxygen compounds	Organooxygen compounds	Alcohols and polyols	Polyols	73036	42837	50563	48675	68505	67949	76395	64579	40104	58087	35351	41156	66590	27274	145136	80589	52948	35421	40826		475779	301830	415207	373086	392105
586	5.07_692.53	692.53	5.065	[M+NH4]+	MSI 2	lipidomics	MGDG 28:0|MGDG 10:0_18:0	GWPYTLKUXJCZCR-UHFFFAOYSA-N	674.497	C37H70O10	CCCCCCCCCCCCCCCCCC(=O)OC(COC1C(C(C(C(O1)CO)O)O)O)COC(=O)CCCCCCCCC	133017512								Organic compounds	Lipids and lipid-like molecules	Glycerolipids	Glycosylglycerols	MGDG	27811			13844	11966	24322	15901	11404	21761			26307			34135			11550	40533	30819	200529	159878	300933	191850	267269
587	4.81_237.19	237.186	4.81	[M+H-2H2O]+	MSI 1	polyphenols	(4aR,5S,6S,8R,8aS)-6-hydroxy-3,8-dimethyl-5-propan-2-yl-4a,5,6,7,8,8a-hexahydro-1H-naphthalen-2-one	KLDSZMWMGCWFKH-GIEZYDSUSA-N	236.35	C15H24O2	C[C@@H]1C[C@@H]([C@H]([C@@H]2[C@H]1CC(=O)C(=C2)C)C(C)C)O	26297667								Organic compounds	Lipids and lipid-like molecules	Prenol lipids	Sesquiterpenoids	Sesquiterpenoids	204845	224168	293237	156001	228676	379739	111528	334105	174632	219778	494952	585099	358970	417365	490360	420614	494382	552674	463835	359023	41601	45422	30945	45607	40711
588	7.91_854.69	854.687	7.907	[M+NH4]+	MSI 2	lipidomics	ASG 29:1;O;Hex;FA 18:3	BYFNXTURFRVSSA-UHFFFAOYSA-N	836.653	C53H88O7	CCC=CCC=CCC=CCCCCCCCC(=O)OCC1C(C(C(C(O1)OC2CCC3(C4CCC5(C(C4CC=C3C2)CCC5C(C)CCC(CC)C(C)C)C)C)O)O)O	77916710								Organic compounds	Lipids and lipid-like molecules	Sterol lipids	Stigmastanes and derivatives	Stigmastanes and derivatives	456305	601126	653060	395776	1086453	684696	1201410	804509	713363	403217	303619	225151	892467	210706	254487	278518	555703	283263	435894	456973	49748	22103	102976	180060	67443
589	4.62_782.57	782.569	4.615	[M+H]+	MSI 2	lipidomics	PC 36:4	NKQPOVROGSWLTO-NVPMBMBWSA-N	782.083	C44H80NO8P	CCCCCCCC/C=C\CCCCCCCC(=O)O[C@H](COC(=O)CCCC/C=C\C/C=C\C/C=C\CCCCC)COP(=O)([O-])OCC[N+](C)(C)C	52922783	HMDB0008170		LMGP01011652			CHEBI:86123		Organic compounds	Lipids and lipid-like molecules	Glycerophospholipids	Glycerophosphocholines	PC	4507	31316	44824		15138	10687	3782	1773	24341	12105	28118	26202	50273		14982	25271	28460	17550	28897	48246	189203	149666	212561	207198	207383
590	4.12_627.50	627.497	4.121	[M+Na]+	MSI 2	lipidomics	DG 35:3	IKJJVJOIPHETGJ-UHFFFAOYSA-N												Organic compounds	Lipids and lipid-like molecules	Glycerolipids	Diradylglycerols	DG	8893	14209		6112	5690		5918	3939	12948	10439	29251	40522	22784	13431	18088	21709	25001	31173	39487	21781	75262	60008	86743	97381	101041
591	7.61_906.72	906.719	7.613	[M+NH4]+	MSI 2	lipidomics	TG 54:9;1O|TG 18:3_18:3_18:3;1O	XTGILNAGWOVVAM-UHFFFAOYSA-N												Organic compounds	Lipids and lipid-like molecules	Glycerolipids	Triradylcglycerols	TG	1845655	1575429	3025686	1014154	3077134	1491383	5215127	2622390	2485315	1717957	196716	158617	2637609	967222	285227	811546	1196882	165038	497207	661760	909752	118787	4164289	136371	254004
592	1.68_331.23	331.228	1.681	[M-H]-	MSI 2	lipidomics	FA 21:5;O	DBSDSUINMGNGLQ-UHFFFAOYSA-N												Organic compounds	Lipids and lipid-like molecules	Fatty Acyls	Fatty acids and conjugates	Fatty acids	60464	92144	46435	36124	71204	77023	86068	71590	48043	55639	96568	145358	244951	153728	120703	127158	138713	125766	124911	190351	307693	311034	309692	356864	302914
593	8.52_322.15	322.15	8.519	[M+H]+	MSI 2	biogenic amines	Famciclovir	GGXKWVWZWMLJEH-UHFFFAOYSA-N	321.332	C14H19N5O4	CC(=O)OCC(CCN1C=NC2=CN=C(N=C21)N)COC(=O)C	3324	HMDB0014570	D00317		DB00426	23038	CHEBI:4974		Organic compounds	Organoheterocyclic compounds	Imidazopyrimidines	Purines and purine derivatives	Purines and purine derivatives	847658	1123878	805877	855863	745075	812069	1142544	787103	924619	896957	1460704	1579398	1613629	1719920	1663369	1816496	1588605	1707814	1583436	1844667	156947	118668	137226	117837	147073
594	2.96_263.09	263.092	2.963	[M+H]+	MSI 3	polyphenols	Violaceol i	YRZXKRQRZJMBFT-UHFFFAOYSA-N	262.259	C14H14O5	CC1=CC(=C(C(=C1)OC2=CC(=CC(=C2O)O)C)O)O	100615						CHEBI:64415		Organic compounds	Benzenoids	Benzene and substituted derivatives	Diphenylethers	Diphenylethers			4007		4775	15501	5329	4818	4822	3485	20732	27044	5041	6517	16024	12939	12692	15437	8310	5015	38579	71172	26142	54047	47251
595	6.71_548.54_6.71_566.55	548.5401_566.5507	6.705_6.706	[M+H-H2O]+_[M+H]+	MSI 1	lipidomics	Cer(d18:1/18:0)	VODZWWMEJITOND-NXCSZAMKSA-N	565.955	C36H71NO3	CCCCCCCCCCCCCCCCCC(=O)N[C@@H](CO)[C@@H](/C=C/CCCCCCCCCCCCC)O	5283565			LMSP02010006			CHEBI:72961		Organic compounds	Lipids and lipid-like molecules	Sphingolipids	Ceramides	Long-chain ceramides	1084995	1616273	1323502	1333782	1440668	1209279	1462514	1492415	1336497	1600821	1994738	1938913	2288383	2275199	2386902	2161024	2004297	1840150	2270465	2746300	13972871	13066892	14173435	13819187	13726076
596	2.44_126.09	126.091	2.441	[M+H-H2O]+	MSI 2	biogenic amines	1-Methylpiperidine-3-carboxylic acid	AYIXGVABNMIOLK-UHFFFAOYSA-N	143.184	C7H13NO2	CN1CCCC(C1)C(=O)O	2736937								Organic compounds	Organoheterocyclic compounds	Piperidines	Piperidinecarboxylic acids and derivatives	Piperidinecarboxylic acids	976629	1032189	759461	779289	746703	851799	1180192	761113	751051	809388	1731949	1877489	2152645	1950164	1807741	1981810	1669240	1757595	1878691	1979639	123946	91042	145520	133685	172026
597	6.63_383.33	383.332	6.631	[M+H]+	MSI 1	polyphenols	Cholest-4,6-Dien-3-One	XIWMRKFKSRYSIJ-GYKMGIIDSA-N	382.623	C27H42O	C[C@H](CCCC(C)C)[C@H]1CC[C@@H]2[C@@]1(CC[C@H]3[C@H]2C=CC4=CC(=O)CC[C@]34C)C	3034666	HMDB0002394		LMST01010059					Organic compounds	Lipids and lipid-like molecules	Sterol lipids	Cholestane steroids	Cholesterols and derivatives	142877	111463	245844	121449	143428	219184	123715	232953	109163	157398	100749	90184	46694	131351	222073	115757	198582	183411	197515	173955	363170	490773	919147	1328318	1336784
598	1.22_361.17	361.166	1.219	[M-H]-	MSI 3	biogenic amines	Secoisolariciresinol	PUETUDUXMCLALY-HOTGVXAUSA-N	362.418	C20H26O6	COC1=C(C=CC(=C1)C[C@@H](CO)[C@@H](CC2=CC(=C(C=C2)O)OC)CO)O	65373	HMDB0013692	C18167				CHEBI:65004	CPD-8909	Organic compounds	Lignans, neolignans and related compounds	Dibenzylbutane lignans	Dibenzylbutanediol lignans	Dibenzylbutanediol lignans	10594	5066	5964	8081	4804	6146	12995	6521	7609	5917	33212	27284	31220	55602	27447	35080	7373	34866	19357	41479	71235	55269	73636	76051	79830
599	9.42_918.76	918.755	9.423	[M+NH4]+	MSI 2	lipidomics	TG 56:9|TG 18:3_18:3_20:3	RACUAPSXWSDIHL-UHFFFAOYSA-N												Organic compounds	Lipids and lipid-like molecules	Glycerolipids	Triradylcglycerols	TG	492680	457192	1211554	341527	1561916	457911	2325337	874008	668176	595310	53987	20424	565823	166369	33459	94636	191072	26162	68504	158782	145626		846061	49016	71834
600	0.73_285.24	285.243	0.733	[M-H]-	MSI 2	lipidomics	FA 17:0;(2OH)	KUZABABLVHWUGR-UHFFFAOYSA-N	286.451	C17H34O3	CCCCCCCCCCCCCCCC(C(=O)O)O	5282906			LMFA01050052			CHEBI:84854		Organic compounds	Lipids and lipid-like molecules	Fatty Acyls	Fatty acids and conjugates	Long-chain fatty acids	2625403	1971559	3347197	3291796	2575027	3119060	2217337	4103573		2755658	10519131	10989393	12364991	10164292	11905945	13224104	11117016	9233128	10972878	82987	29395426	33804265	27783548	30100619	31309022
601	62261	398	588335	[M]*+	MSI 1	primary metabolism	Ciliatine	QQVDJLLNRSOCEL-UHFFFAOYSA-N	125.064	C2H8NO3P	C(CP(=O)(O)O)N	339	HMDB0011747	C03557				CHEBI:15573	CPD-1106	Organic compounds	Organic acids and derivatives	Organic phosphonic acids and derivatives	Organic phosphonic acids	Organic phosphonic acids	1893	1521	1590	1723	1120	1501	1569	1843	636	590	776	865	1433	1828	1372	919	670	1778	938	1116	14987	10666	14147	14766	11474
602	6.73_385.35	385.347	6.726	[M+H]+	MSI 2	polyphenols	Cholestenone	OZRGLPAXIYOWIG-HZPUXBNGSA-N	384.648	C27H44O	C[C@H](CCC(=O)C(C)C)[C@H]1CC[C@@H]2[C@@]1(CC[C@H]3[C@H]2CCC4=CCCC[C@]34C)C	129628117								Organic compounds	Lipids and lipid-like molecules	Sterol lipids	Cholestane steroids	Cholesterols and derivatives	6692908	10450055	10526436	5719206	7368560	11164090	5198215	10443114	5167208	7759331	8091310	9502142	6476087	9646759	10253403	9639809	8698529	10996136	9942849	7990175	47251388	55855181	55788827	74095121	79944857
603	6.24_114.09	114.091	6.243	[M+H-C2H7N]+	MSI 2	biogenic amines	N-[3-(Dimethylamino)propyl]propanamide	LPRTUAMEQDRMAZ-UHFFFAOYSA-N	158.242	C8H18N2O	CCC(=O)NCCCN(C)C	104430								Organic compounds	Organic acids and derivatives	Carboxylic acids and derivatives	Carboxylic acid derivatives	Carboxylic acid amides	256356	262337	215695	229111	218618	250922	299920	234718	243931	278226	498743	534589	579118	534545	529810	575520	521638	546511	489788	564744	2800982	2206345	2964886	2551452	3452973
604	1.07_337.27	337.274	1.067	[M+H-H2O]+	MSI 2	biogenic amines	MG 18:2 9Z,12Z	WECGLUPZRHILCT-FQEVSTJZSA-N	354.525	C21H38O4	CCCCCC=CCC=CCCCCCCCC(=O)OC[C@H](CO)O	92175								Organic compounds	Lipids and lipid-like molecules	Fatty Acyls	Lineolic acids and derivatives	Lineolic acids and derivatives	99710	35933	11104	6287	66171	12626	39248	46760	23197	15355	152107	93828	114247	256330	109747	178109	222514	184902	169885		919687	498989	380554	555373	996804
605	6.21_137.07	137.071	6.214	[M+Na]+	MSI 1	biogenic amines	1-Methyl nicotinamide	LDHMAVIPBRSVRG-UHFFFAOYSA-O	137.159	C7H9N2O	C[N+]1=CC=CC(=C1)C(=O)N	457	HMDB0000699	C02918				CHEBI:16797	CPD-396	Organic compounds	Organoheterocyclic compounds	Pyridines and derivatives	Pyridinecarboxylic acids and derivatives	Pyridinecarboxamides	189545	434386	213089	208734	190755	168834	217570	196949	159297	177517	209244	242262	241816	221941	293841	193770	213700	187330	232587	210251	1864087	1477984	1958049	1751427	2550665
606	3.56_250.18	250.18	3.558	[M+H]+	MSI 2	biogenic amines	O-Desmethyl-cis-tramadol	UWJUQVWARXYRCG-UHFFFAOYSA-N	249.349	C15H23NO2	CN(C)CC1CCCCC1(C2=CC(=CC=C2)O)O	130829								Organic compounds	Benzenoids	Benzene and substituted derivatives	Cyclohexylphenols	Cyclohexylphenols	1809575	2238851	1667144	1608394	1600962	2032025	2673020	1782545	1406085	1967806	3794161	4378923	4717602	4639835	4690830	4165810	4976121	4473577	4219955	3361890	357857	272960	335629	325487	398722
607	2.53_326.31	326.305	2.527	[M+H]+	MSI 2	lipidomics	Oleoyl-EA	BOWVQLFMWHZBEF-KTKRTIGZSA-N	325.53	C20H39NO2	CCCCCCCC/C=C\CCCCCCCC(=O)NCCO	5283454	HMDB0002088		LMFA08040015			CHEBI:71466		Organic compounds	Organic nitrogen compounds	Organonitrogen compounds	Amines	Alkanolamines	1764941	2058661	1660579	1560639	2084585	1840485	2064441	1314868	1658497	1770633	4690315	5008955	5693765	5712715	4812761	4531688	4549656	5014821	4729983	5673746	17542979	18763747	17019985	16825019	18144057
608	7.87_141.07	141.066	7.866	[M+H]+	MSI 2	biogenic amines	2-(1-Methyl-1H-imidazol-5-yl)acetic acid	UJCGYTCAMOHYCG-UHFFFAOYSA-N	140.14	C6H8N2O2	CN1C=NC=C1CC(=O)O	6451814	HMDB0004988					CHEBI:70966		Organic compounds	Organoheterocyclic compounds	Azoles	Imidazoles	Substituted imidazoles	35188276	40074833	29437203	29803473	26856154	32691783	47629496	31241863	31726073	34573149	74724734	76563834	76048943	74390098	71672212	75845081	77409216	71755246	67214006	71735292	448139425	359404920	427554621	379430814	466410685
609	6.15_194.05	194.049	6.149	[M-H]-	MSI 2	biogenic amines	Pencolide	NFDKQFGUQFNACT-UTCJRWHESA-N	195.172	C9H9NO4	C/C=C(/C(=O)O)\N1C(=O)C=C(C1=O)C	38353904								Organic compounds	Organic acids and derivatives	Carboxylic acids and derivatives	Amino acids, peptides, and analogues	Amino acids and derivatives	17223	19832	10061	9107	11609	15655	19998	15054	13821	12964	39022	41039	33390	36071	35639	39820	42039	34597	35733	27164	109291	91487	113177	111205	123061
610	4.60_237.16	237.16	4.6	[M+Na]+	MSI 2	biogenic amines	tert-Butyl 4-(aminomethyl)-1-piperidinecarboxylate	KLKBCNDBOVRQIJ-UHFFFAOYSA-N	214.305	C11H22N2O2	CC(C)(C)OC(=O)N1CCC(CC1)CN	736817								Organic compounds	Organoheterocyclic compounds	Piperidines	Piperidinecarboxylic acids and derivatives	Piperidinecarboxylic acids	10993924	11854198	8824989	8946674	8667068	9958323	15104299	9860622	10374213	10303335	22860581	26058933	28788951	26156908	25144113	25866083	25890519	24878431	19675479	24686545	1869132	1372265	1782417	1681170	2203084
611	4.70_584.56	584.562	4.695	[M+H]+	MSI 2	lipidomics	Cer 36:0;O3|Cer 18:0;O2/18:0;O	TWVUZTCVZAHCIE-UHFFFAOYSA-N	583.97	C36H73NO4	CCCCCCCCCCCCCCCCC(C(=O)NC(CO)C(CCCCCCCCCCCCCCC)O)O	18625180								Organic compounds	Lipids and lipid-like molecules	Sphingolipids	Ceramides	Long-chain ceramides	95658	73171	85665	106808	134788	98523	81415	109890	114354	94568	199395	222989	249480	96862	223601	233784	235242	218006	211569	302708	756438	544435	739236	651658	788712
612	6.22_319.26	319.264	6.218	[M+H-2H2O]+	MSI 1	polyphenols	Bilobol	TUGAUFMQYWZJAB-FPLPWBNLSA-N	318.494	C21H34O2	CCCCCC/C=C\CCCCCCCC1=CC(=CC(=C1)O)O	5281852		C10770				CHEBI:3104		Organic compounds	Benzenoids	Phenols	Benzenediols	Resorcinols	8677072	19491140	19940840	10936476	13045931	21547378	9915403	19358150	8660940	12250207	3825760	4224744	3843498	5613986	5347231	5222055	4497138	5934600	5522500	4137680	77713370	92306698	102449289	118941485	128502336
613	7.89_235.04	235.039	7.893	[M-H]-	MSI 2	biogenic amines	Asp-Cys	FKBFDTRILNZGAI-UHFFFAOYSA-N	236.247	C7H12N2O5S	C(C(C(=O)NC(CS)C(=O)O)N)C(=O)O	18218191	HMDB0028750							Organic compounds	Organic acids and derivatives	Carboxylic acids and derivatives	Amino acids, peptides, and analogues	Peptides	173259	183225	185941	191928	150791	194514	187832	182400	177756	176453	265733	243289	284736	263475	303218	298054	258064	262492	250598	245439	17947	14581	15676	14268	19310
614	9.75_899.71_9.75_894.75	899.7086_894.7542	9.75_9.754	[M+Na]+_[M+NH4]+	MSI 2	lipidomics	TG 54:7|TG 18:2_18:2_18:3	NGPHUAVENUDDAO-UHFFFAOYSA-N	876.721	C57H96O6	CCCCCC=CCC=CCCCCCCCC(=O)OCC(COC(=O)CCCCCCCC=CCC=CCC=CCC)OC(=O)CCCCCCCC=CCC=CCCCCC	85034647								Organic compounds	Lipids and lipid-like molecules	Glycerolipids	Triradylcglycerols	TG	196370825	202802483	348065032	113732453	522561673	186600573	493130857	303972296	256844841	152598581	21045368	19666794	177085694	99614892	30248467	29027887	52859327	15296827	30547099	52938580	46766901	48209145	137457087	33228557	37458261
615	6.41_369.34	369.338	6.41	[M+H-H2O]+	MSI 2	polyphenols	Monoarachidin	UMEKPPOFCOUEDT-UHFFFAOYSA-N	386.61	C23H46O4	CCCCCCCCCCCCCCCCCCCC(=O)OCC(CO)O	3246944			LMGL01010007					Organic compounds	Lipids and lipid-like molecules	Glycerolipids	Monoradylglycerols	Monoacylglycerols	1443880	2420208	2410762	989904	1670138	2881298	889304	3968126	530746	1714893	967656	861513	425509	1294238	1120632	1030499	950089	1519039	1108783	1041586	10737659	12947882	13013380	16440769	11699031
616	7.35_230.11	230.114	7.346	[M+Na]+	MSI 2	biogenic amines	N-(4-tert-Butoxyphenyl)acetamide	QTNZYVAMNRDUAD-UHFFFAOYSA-N	207.269	C12H17NO2	CC(=O)NC1=CC=C(C=C1)OC(C)(C)C	16426		D03181						Organic compounds	Benzenoids	Benzene and substituted derivatives	Anilides	Acetanilides	1886726	1944926	1324039	1211050	1293034	1280571	1696128	1298293	1312089	1280615	3215466	3407355	3153285	3323755	2755910	3333954	3340833	3466724	2576752	2718848	289205	238971	263519	243206	278430
617	4.89_385.35	385.346	4.895	[M+H]+	MSI 2	lipidomics	ST 27:2;O	AVSXSVCZWQODGV-UHFFFAOYSA-N	384.639	C27H44O	CC(CCC=C(C)C)C1CCC2C1(CCC3C2CC=C4C3(CCC(C4)O)C)C	313036								Organic compounds	Lipids and lipid-like molecules	Sterol lipids	Cholestane steroids	Cholesterols and derivatives	41105353	43869225	40112312	23884113	39875482	37579285	32948380	36812567	32240820	31365216	47942277	38089673	52569755	57111800	54906529	41146760	47426195	36737860	55690284	51716311	293033716	256409082	315292698	235261282	317347684
618	2.61_355.32	355.322	2.613	[M-H]-	MSI 2	lipidomics	FA 22:0;(2OH)	RPGJJWLCCOPDAZ-UHFFFAOYSA-N	356.584	C22H44O3	CCCCCCCCCCCCCCCCCCCCC(C(=O)O)O	193484	HMDB0061660		LMFA01050077			CHEBI:76980		Organic compounds	Lipids and lipid-like molecules	Fatty Acyls	Fatty acids and conjugates	Very long-chain fatty acids	130427	67606	843038	1175152	1771248	2154902	929766	2406342	1441515	435064	477820	538166	2371239	3945842	15084452	15788344	78807624	20060790	75689220	77670325	103791	66442	631748	515002	1700255
619	3.48_377.32	377.32	3.484	[M+H-H2O]+	MSI 2	lipidomics	ST 28:4;O	QSVJYFLQYMVBDR-UHFFFAOYSA-N	394.634	C28H42O	CC(C)C(C)C=CC(C)C1CCC2C1(CC=C3C2=CC=C4C3(CCC(C4)O)C)C	3593510								Organic compounds	Lipids and lipid-like molecules	Sterol lipids	Ergostane steroids	Ergosterols and derivatives		24995	14331	35953	15366	34519	21404	20294	26911	21374	57079	65726	61853	46547	61219	55227	79766	39997	71807	102640	6976		4346	5001
620	12.32_1047.01	1047.01	12.325	[M+NH4]+	MSI 2	lipidomics	TG 64:1|TG 22:0_24:0_18:1	BDYAOBMCGRJNQC-UHFFFAOYSA-N												Organic compounds	Lipids and lipid-like molecules	Glycerolipids	Triradylcglycerols	TG	317628	338169	134193	222861	202083	164929	359630	217440	249766	264474	127651	132450	87454	202510	103462	214611	137872	169395	122676	187097	178960	30532	345986	52868	53007
621	1.33_237.19	237.185	1.331	[M+H-H2O]+	MSI 2	biogenic amines	4,11-Dimethyl-8-(propan-2-yl)-5,12-dioxatricyclo[9.1.0.04,6]dodecan-7-ol	CZZAIHWBOUXBPS-UHFFFAOYSA-N	254.188	C15H26O3	CC(C)C1CCC2(C(O2)CCC3(C(C1O)O3)C)C	45359817								Organic compounds	Lipids and lipid-like molecules	Prenol lipids	Sesquiterpenoids	Germacrane sesquiterpenoids	1214608	1656743	1180008	1215324	1048384	1420144	1645430	1362726	1210824	1262232	3349875	3535466	3401294	3235272	2466534	3426114	2732247	2324473	3113359	3040512	232205	203432	232256	256945	254014
622	6.42_309.32	309.316	6.415	[M+H-2H2O]+	MSI 2	polyphenols	3-Hexadecyl-4-methoxy-5-methyloxolan-2-one	DJNFXUFERDZHCD-UHFFFAOYSA-N	354.568	C22H42O3	CCCCCCCCCCCCCCCCC1C(C(OC1=O)C)OC	23872036								Organic compounds	Organoheterocyclic compounds	Lactones	Gamma butyrolactones	Gamma butyrolactones	111834	219789	180092	104431	127445	284355	39253	383240	25214	152145	61994	95765	16874	113623	93857	109185	80225	225857	140951	160616	903864	1025820	1160790	1433273	976741
623	4.88_181.10	181.097	4.884	[M+H-H2O]+	MSI 2	biogenic amines	2-Methylbenzhydrol	MXHXXJOHFRHBFB-UHFFFAOYSA-N	198.261	C14H14O	CC1=CC=CC=C1C(C2=CC=CC=C2)O	95659								Organic compounds	Benzenoids	Benzene and substituted derivatives	Diphenylmethanes	Diphenylmethanes	44158	99552	52674	66301	54445	73866	103527	59762	78020	65477	129892	143682	169520	173432	165494	151239	154129	157084	146201	101174	859422	621082	803646	734342	788478
624	6431	315	804279	[M]*+	MSI 1	primary metabolism	Fructose 6-phosphate	GSXOAOHZAIYLCY-HSUXUTPPSA-N	260.136	C6H13O9P	C([C@H]([C@H]([C@@H](C(=O)CO)O)O)O)OP(=O)(O)O	69507	HMDB0000124					CHEBI:15946		Organic compounds	Organic oxygen compounds	Organooxygen compounds	Carbohydrates and carbohydrate conjugates	Monosaccharides	16197	12140	13922	16519	9991	12669	15235	16477	7665	4738	559	863	700	1598	983	973	649	1764	498	816	428	518	481	267	288
625	6.64_564.54	564.536	6.64	[M-H]-	MSI 2	lipidomics	Cer 36:1;O2|Cer 18:1;O2/18:0	VODZWWMEJITOND-UHFFFAOYSA-N	565.955	C36H71NO3	CCCCCCCCCCCCCCCCCC(=O)NC(CO)C(C=CCCCCCCCCCCCCC)O	3607830								Organic compounds	Lipids and lipid-like molecules	Sphingolipids	Ceramides	Ceramides	86258	99612	130274	112009	78177	106270	85150	78373	88806	102925	151811	130810	112996	136501	159221	148486	141351	168167	140877	189886	732271	800346	581280	600568	663164
626	6.17_275.24	275.238	6.173	[M+H-H2O]+	MSI 2	polyphenols	5.beta.-Androstane-3.alpha.,17.beta.-diol	CBMYJHIOYJEBSB-GCFMDFLISA-N	292.457	C19H32O2	CC12CC[C@H](C[C@H]1CCC3C2CCC4(C3CC[C@@H]4O)C)O	6432196								Organic compounds	Lipids and lipid-like molecules	Sterol lipids	Androstane steroids	Androgens and derivatives	2863516	7430210	8003909	4254316	4204923	7902247	3687057	6425936	3001797	4260704	1258943	1367184	1373402	2053236	1836106	1600786	1818485	1922853	1761573	1265390	32794450	42067570	45573952	52106072	53682706
627	5.79_264.20	264.196	5.786	[M+H]+	MSI 2	polyphenols	rac-N-Desmethylvenlafaxine	MKAFOJAJJMUXLW-UHFFFAOYSA-N	263.376	C16H25NO2	CNCC(C1=CC=C(C=C1)OC)C2(CCCCC2)O	3501942	HMDB0013892					CHEBI:83525		Organic compounds	Benzenoids	Phenol ethers	Anisoles	Anisoles	100262	74941	132698	64533	119346	183536	58557	175641	82539	166319	190103	272886	153719	156536	243214	171125	236113	217813	241982	192796
628	4.67_249.16	249.16	4.668	[M+H-CO]+	MSI 2	biogenic amines	5-[4-(Isopentyloxy)phenyl]-5-methyl-2,4-imidazolidinedione	QNZJWTRKDHNKFB-UHFFFAOYSA-N	276.331	C15H20N2O3	CC(C)CCOC1=CC=C(C=C1)C2(C(=O)NC(=O)N2)C	2835307								Organic compounds	Organoheterocyclic compounds	Azolidines	Imidazolidines	Imidazolidinones	1508568	1733250	1205542	1268036	1219757	1463088	1922305	1326872	1439388	1341936	3244762	3481193	3998265	3607485	3502737	3214160	3879476	3589222	2899240	3272294	271353	222553	312000	236487	303488
629	8.81_493.50	493.499	8.808	[M-H]-	MSI 2	lipidomics	Psyllic acid	HQRWEDFDJHDPJC-UHFFFAOYSA-N	494.877	C33H66O2	CCCCCCCCCCCCCCCCCCCCCCCCCCCCCCCCC(=O)O	181572			LMFA01010033					Organic compounds	Lipids and lipid-like molecules	Fatty Acyls	Fatty acids and conjugates	Very long-chain fatty acids	161154	148094	213601	169457	209004	174954	225486	184676	93539	122032	252163	283793	483534	447485	315094	374280	426332	262320	292427	370885	25566	20775	41621	9651	18822
630	9.31_423.22	423.224	9.309	[M+H]+	MSI 2	biogenic amines	Phe-Glu-Lys	PSKRILMFHNIUAO-JYJNAYRXSA-N	422.217	C20H30N4O6	C1=CC=C(C=C1)C[C@@H](C(=O)N[C@@H](CCC(=O)O)C(=O)N[C@@H](CCCCN)C(=O)O)N	91975163								Organic compounds	Organic acids and derivatives	Carboxylic acids and derivatives	Amino acids, peptides, and analogues	Peptides	38057	22063	22339	19352	35096	23397	7270	5268	10548	10736	51551	50299	61882	58534	76881	65692	56514	69147	37760	93024	302193	273715	266554	250132	253179
631	2.56_493.34	493.336	2.558	[M-H]-	MSI 2	lipidomics	ST 29:1;O;S	IPVNPUHVCZJVOI-UHFFFAOYSA-N	494.343	C29H50O4S	CCC(CCC(C)C1CCC2C1(CCC3C2CC=C4C3(CCC(C4)OS(=O)(=O)O)C)C)C(C)C	21954218								Organic compounds	Lipids and lipid-like molecules	Sterol lipids	Stigmastanes and derivatives	Stigmastanes and derivatives	14737	10828	14258	28645	10150	4902	4385	8342	7265	25597			37082		2775	2668	11055		9012	529134
632	7.15_118.09	118.086	7.154	[M+H]+	MSI 1	biogenic amines	Betaine	KWIUHFFTVRNATP-UHFFFAOYSA-N	117.147	C5H11NO2	C[N+](C)(C)CC(=O)[O-]	247	HMDB0000043	C00719			22666	CHEBI:17750	BETAINE	Organic compounds	Organic acids and derivatives	Carboxylic acids and derivatives	Amino acids, peptides, and analogues	Amino acids and derivatives	5330888	6054933	5053794	4660107	4499357	5288458	6228319	5276618	5830328	5139616	9947200	10912869	10623847	10540319	10868411	10184863	10650934	11130660	9364292	11172319	58203724	41866607	55694306	50434962	62054320
633	7.46_199.12	199.119	7.462	[M+H]+	MSI 2	biogenic amines	Tacrine	YLJREFDVOIBQDA-UHFFFAOYSA-N	198.264	C13H14N2	C1CCC2=NC3=CC=CC=C3C(=C2C1)N	1935	HMDB0014526	C01453		DB00382	43723		CPD-10887	Organic compounds	Organoheterocyclic compounds	Quinolines and derivatives	Benzoquinolines	Acridines	565678	667899	517706	532886	461817	589650	750316	533715	589236	609845	1164407	1284160	1209263	1232381	1044867	1239103	1117175	1077242	939193	1045482	87083	68568	109783	94059	113513
634	0.74_353.23	353.231	0.737	[M-H]-	MSI 2	lipidomics	FA 20:3;3O	DHVGNYSCNRCFGZ-UHFFFAOYSA-N												Organic compounds	Lipids and lipid-like molecules	Fatty Acyls	Fatty acids and conjugates	Fatty acids	229802	161516	230758	152930	159433	212594	188825	267968	206327	158914	620310	393331	565183	607452	623806	603381	564055	624956	407089	698647	2146422	1998458	2115266	2279766	2126710
635	8.11_622.61_8.11_604.60	622.6135_604.6028	8.106_8.107	[M+H]+_[M+H-H2O]+	MSI 1	lipidomics	Cer 40:1;O2|Cer(d18:1/22:0)	KEPQASGDXIEOIL-GLQCRSEXSA-N	622.062	C40H79NO3	CCCCCCCCCCCCCCCCCCCCCC(=O)N[C@@H](CO)[C@@H](/C=C/CCCCCCCCCCCCC)O	5283567			LMSP02010008			CHEBI:72966		Organic compounds	Lipids and lipid-like molecules	Sphingolipids	Ceramides	Ceramides	566612	671417	507872	505446	680295	552053	514931	529548	488365	417196	776026	817310	1056528	841776	761082	722512	929902	822915	794521	1105895	5256023	3937456	4642403	3977218	4550613
636	1.20_537.29	537.286	1.204	[M+H-2H2O]+	MSI 2	biogenic amines	Ganoderic acid H	YCXUCEXEMJPDRZ-UHFFFAOYSA-N	572.688	C32H44O9	CC(CC(=O)CC(C)C(=O)O)C1CC(=O)C2(C1(C(C(=O)C3=C2C(=O)CC4C3(CCC(C4(C)C)O)C)OC(=O)C)C)C		HMDB0035987							Organic compounds	Lipids and lipid-like molecules	Prenol lipids	Triterpenoids	Triterpenoids	16374504	10342230	12913136	10286512	14289771	12779069	12383125	11195654	11835192	10441327	13870434	12595508	14152127	16465293	14082396	14418074	13798605	14477664	9861555	12099685	1854910	1154833	1320424	1690381	1725900
637	6.04_600.56	600.557	6.035	[M+H]+	MSI 2	lipidomics	Cer 36:0;O4|Cer 18:0;O3/18:0;(2OH)	BBAFBDLICMHBNU-UHFFFAOYSA-N	599.97	C36H73NO5	CCCCCCCCCCCCCCCCC(C(=O)NC(CO)C(C(CCCCCCCCCCCCCC)O)O)O	9894945								Organic compounds	Lipids and lipid-like molecules	Sphingolipids	Ceramides	Long-chain ceramides	46585	67272	50194	70368	67299	45294	34015	34584	46705	60000	100352	134288	114955	71241	125125	105415	122271	92716	107808	172420	486793	391252	422919	471159	522786
638	1.06_299.26_1.06_335.24	299.2591_335.2360	1.065_1.061	[M-H]-_[M+Cl]-	MSI 2	biogenic amines	3-Hydroxy stearic acid	POMQYTSPMKEQNB-UHFFFAOYSA-N	300.477	C18H36O3	CCCCCCCCCCCCCCCC(CC(=O)O)O	5282907			LMFA02000121			CHEBI:50578		Organic compounds	Lipids and lipid-like molecules	Fatty Acyls	Fatty acids and conjugates	Long-chain fatty acids	62977931	21974652	18494584	37334829	55939734	27984360	30184205	22819335	23378532	24083056	24856363	36420857	33673775	45468881	37916034	37225186	17930162	30350881	35939531	9128091	236354846	235539594	217318139	246774692	225694364
639	5.06_328.15	328.154	5.06	[M+H]+	MSI 2	biogenic amines	Naloxone	UZHSEJADLWPNLE-GRGSLBFTSA-N	327.375	C19H21NO4	C=CCN1CC[C@]23[C@@H]4C(=O)CC[C@]2([C@H]1CC5=C3C(=C(C=C5)O)O4)O	5284596	HMDB0015314	C07252		DB01183	23349	CHEBI:7459		Organic compounds	Benzenoids	Phenanthrenes and derivatives		Phenanthrenes and derivatives	194827	180346	141294	152666	147593	165626	203244	142990	164764	126964	357396	402822	439103	447015	349355	313875	433185	380754	258289	365466	25787	20920	17989	10331	26230
640	7.89_610.61	610.613	7.888	[M+H]+	MSI 2	lipidomics	Cer 39:0;O2|Cer 19:0;O2/20:0	BIFMSTXKGBZSAW-UHFFFAOYSA-N	609.606	C39H79NO3	CCCCCCCCCCCCCCCCCCCC(=O)NC(CO)C(CCCCCCCCCCCCCCCC)O	132994579								Organic compounds	Lipids and lipid-like molecules	Sphingolipids	Ceramides	Long-chain ceramides	54790	83824	76422	38105	77884	88298	55534	55082	72098	73044	114757	83841	175770	25066	87920	124398	151466	145616	138426	147572	9956	9533	6005	7524	9951
641	3.86_165.13	165.128	3.864	[M+H-CH4O3]+	MSI 2	polyphenols	Traumatic acid	MAZWDMBCPDUFDJ-VQHVLOKHSA-N	228.285	C12H20O4	C(CCCCC(=O)O)CCC/C=C/C(=O)O	5283028	HMDB0000933	C16308	LMFA01170002			CHEBI:545687		Organic compounds	Lipids and lipid-like molecules	Fatty Acyls	Fatty acids and conjugates	Medium-chain fatty acids	47494	48304	52378	41620	40910	92075	20394	62584	30505	46034	107477	98405	62518	62089	104948	98084	100394	118688	85285	73546	345213	486333	305002	470631	435266
642	9.10_878.72_9.09_883.68	878.7229_883.6779	9.095_9.093	[M+NH4]+_[M+Na]+	MSI 2	lipidomics	TG 53:8|TG 18:2_17:3_18:3	CGNGQPZWYJGZST-UHFFFAOYSA-N												Organic compounds	Lipids and lipid-like molecules	Glycerolipids	Triradylcglycerols	TG	388799	248183	695381	243578	582833	451293	1419018	599838	546323	309444	15278	6755	628530	93781	30663	143274	74018	9438	38850	77785	136059	25674	502982	52046	69454
643	4.73_350.23	350.233	4.73	[M+H]+	MSI 2	biogenic amines	Mavorixafor	WVLHHLRVNDMIAR-IBGZPJMESA-N	349.473	C21H27N5	C1C[C@@H](C2=C(C1)C=CC=N2)N(CCCCN)CC3=NC4=CC=CC=C4N3	11256587		C20266						Organic compounds	Organoheterocyclic compounds	Quinolines and derivatives	Aminoquinolines and derivatives	Aminoquinolines and derivatives	311664	412162	289087	295039	262074	298759	494918	357006	326377	343883	824970	774297	999970	844505	878081	794912	922860	881703	719641	744974	80364	49512	69010	57646	71919
644	7.15_156.04	156.042	7.152	[M+H]+	MSI 2	biogenic amines	4-Amino-2-oxo-1,2-dihydropyrimidine-5-carboxylic acid	BLQMCTXZEMGOJM-UHFFFAOYSA-N	155.112	C5H5N3O3	C1=NC(=O)NC(=C1C(=O)O)N	77213						CHEBI:76793		Organic compounds	Organoheterocyclic compounds	Diazines	Pyrimidines and pyrimidine derivatives	Pyrimidinecarboxylic acids and derivatives	64284	118313	85154	32479	44191	76738	166887	86349	43719	99226	377122	416518	387190	434244	381749	370375	383758	433523	296270	342564	1748036	903042	1473407	1141295	1681558
645	1.44_424.34	424.342	1.441	[M+H]+	MSI 2	lipidomics	CAR 18:2	MJLXQSQYKZWZCB-DQFWFXSYSA-N	423.63	C25H45NO4	CCCCC/C=C\C/C=C\CCCCCCCC(=O)O[C@H](CC(=O)[O-])C[N+](C)(C)C	6450015	HMDB0006469		LMFA07070009			CHEBI:84098		Organic compounds	Lipids and lipid-like molecules	Fatty Acyls	Fatty acid esters	Acyl carnitines											28635	20333	46503		46452	3604	37612	36822	40471	13639	521544	1025312	400204	539352	508887
646	5.95_369.13	369.135	5.945	[M+H]+	MSI 3	polyphenols	3-(3,4-dimethoxyphenyl)-1-(2-hydroxy-4,6-dimethoxyphenyl)propan-1-one	MQEOTHTYNCMSAN-UHFFFAOYSA-N	346.375	C19H22O6	COC1=C(C=C(C=C1)CCC(=O)C2=C(C=C(C=C2OC)OC)O)OC	12493013								Organic compounds	Phenylpropanoids and polyketides	Linear 1,3-diarylpropanoids	Chalcones and dihydrochalcones	2'-Hydroxy-dihydrochalcones	9940	50830	1599	7425	4229	12385	1278	10378		32848							4922	35824			22453	37640	23257	26268	64421
647	5.07_286.14	286.144	5.073	[M+H]+	MSI 1	biogenic amines	Hydromorphone	WVLOADHCBXTIJK-YNHQPCIGSA-N	285.338	C17H19NO3	CN1CC[C@]23[C@@H]4[C@H]1CC5=C2C(=C(C=C5)O)O[C@H]3C(=O)CC4	5284570	HMDB0014472	C07042		DB00327	23133	CHEBI:5790		Organic compounds	Alkaloids and derivatives	Morphinans		Morphinans	2464115	2465024	1822577	2011643	1894859	2105297	3009795	2030544	2237373	1771916	4635988	5624162	5994326	5580797	5093692	4778754	5536902	4728903	3956807	4814741	401306	278632	369093	334247	462269
648	6.06_549.49	549.489	6.064	[M-H]-	MSI 2	lipidomics	FAHFA 35:1;O|FAHFA 18:1/17:0;O	BWBVZLJSOBLMGJ-UHFFFAOYSA-N												Organic compounds	Lipids and lipid-like molecules	Fatty Acyls	Fatty acids and conjugates	Long-chain fatty acids	61225	103629	246322	154032	148316	126702	99430	216518	271253	105491	119607	148847	187757	179845	193606	141738	193757	121645	167077	176491	767363	1081752	715139	977640	841855
649	3.59_778.52	778.516	3.593	[M-H]-	MSI 2	lipidomics	SHexCer 34:1;O2	GNEPXEXPDFPEGA-UHFFFAOYSA-N												Organic compounds	Lipids and lipid-like molecules	Sphingolipids	Glycosphingolipids	SHexCer	7117	14483		25512	12567	8853		13918	18832	6021	32607	43157	59228	54435	46254	41147	49672	62137	49732	46514	245282	337043	168487	208572	214262
650	5.13_152.03	152.034	5.126	[M-H]-	MSI 2	biogenic amines	4-Aminosalicylic acid	WUBBRNOQWQTFEX-UHFFFAOYSA-N	153.136	C7H7NO3	C1=CC(=C(C=C1N)O)C(=O)O	4649	HMDB0014378	C02518		DB00233	22591			Organic compounds	Benzenoids	Benzene and substituted derivatives	Benzoic acids and derivatives	Hydroxybenzoic acid derivatives	138258	128828	87244	113651	83884	112211	139742	116940	112732	99618	309755	354231	320665	276030	289620	269507	271276	263304	219211	243556	1019720	702227	982204	892958	1117746
651	8.69_295.09	295.094	8.685	[M-H]-	MSI 2	biogenic amines	Asp-Tyr	NALWOULWGHTVDA-UWVGGRQHSA-N	296.276	C13H16N2O6	C1=CC(=CC=C1C[C@@H](C(=O)O)NC(=O)[C@H](CC(=O)O)N)O	152455						CHEBI:73455		Organic compounds	Organic acids and derivatives	Carboxylic acids and derivatives	Amino acids, peptides, and analogues	Peptides	10078	18331	9751	6113	5080	17356	16573	8803	14542	15198	65542	68951	74532	90331	70731	82006	75324	76668	61633	81503	245589	141432	200153	152136	219598
652	8.49_884.73	884.735	8.495	[M+NH4]+	MSI 2	lipidomics	TG 52:6;1O|TG 16:0_18:3_18:3;1O	NEARCVKCLXTTGF-UHFFFAOYSA-N												Organic compounds	Lipids and lipid-like molecules	Glycerolipids	Triradylcglycerols	TG	415177	487810	705834	290390	1007592	607603	1031040	632738	583761	397966	61939	79839	701360	270433	98915	209661	324712	25098	115092	204764	276911	44721	846739	60057	157276
653	9.92_347.17	347.168	9.918	[M+H]+	MSI 2	biogenic amines	Asp-Gly-Arg	YNCHFVRXEQFPBY-BQBZGAKWSA-N	346.34	C12H22N6O6	C(C[C@@H](C(=O)O)NC(=O)CNC(=O)[C@H](CC(=O)O)N)CN=C(N)N	9950112								Organic compounds	Organic acids and derivatives	Carboxylic acids and derivatives	Amino acids, peptides, and analogues	Peptides	102643	91106	68073	64688	64488	71983	85372	63957	46144	58926	151397	115330	176351	171545	176615	170130	142932	141126	127408	186346	715836	526597	680972	622582	843094
654	6.07_544.49	544.495	6.068	[M+NH4]+	MSI 2	lipidomics	DG 29:0|DG 14:0_15:0	UWIIGCBFEBKNOZ-UHFFFAOYSA-N	526.46	C32H62O5	CCCCCCCCCCCCCCC(=O)OC(CO)COC(=O)CCCCCCCCCCCCC	76040438								Organic compounds	Lipids and lipid-like molecules	Glycerolipids	Diradylglycerols	DG	463293	477649	394437	421929	428489	417181	555691	429777	415843	345706	266692	312959	215873	393949	288428	257327	289971	274848	232820	275111	55918	57386	96137	69428	142454
655	8.75_650.64_8.75_632.63	650.645_632.6342	8.746_8.746	[M+H]+_[M+H-H2O]+	MSI 1	lipidomics	Cer 42:1;O2|Cer(d18:1/24:0)	ZJVVOYPTFQEGPH-AUTSUKAISA-N	650.115	C42H83NO3	CCCCCCCCCCCCCCCCCCCCCCCC(=O)N[C@@H](CO)[C@@H](/C=C/CCCCCCCCCCCCC)O	5283571			LMSP02010012			CHEBI:72965		Organic compounds	Lipids and lipid-like molecules	Sphingolipids	Ceramides	Ceramides	606532	659550	527628	598404	705579	733315	696635	611987	520501	603864	932865	881770	1140856	819119	855086	901014	1216070	837349	1074995	1412270	4661240	3972052	4082679	2922875	4289479
656	4.56_780.55_4.56_802.54	780.5534_802.5365	4.558_4.561	[M+H]+_[M+Na]+	MSI 1	lipidomics	PC 36:5	SUZYROYNFNQALJ-MHEIZRSESA-N	780.067	C44H78NO8P	CCCCCCCCCCCCCCCC(=O)O[C@H](COC(=O)CCC/C=C\C/C=C\C/C=C\C/C=C\C/C=C\CC)COP(=O)([O-])OCC[N+](C)(C)C	52923341	HMDB0008495		LMGP01011932					Organic compounds	Lipids and lipid-like molecules	Glycerophospholipids	Glycerophosphocholines	PC	664158	174761	573830	204272	256973	226130	562650	119376	444695	365936	263726	33129	133056	12988	32411	98223	129756	29353	55539	161295	37896	17388	66312	30539	61931
657	6.50_282.17	282.17	6.499	[M+H]+	MSI 2	biogenic amines	2H-Pyran-4-acetamide, 2-(3,5-dimethyl-2-oxocyclohexyl)tetrahydro-6-oxo-	SAVFIMRLAWCZGX-UHFFFAOYSA-N	281.348	C15H23NO4	CC1CC(C(=O)C(C1)C2CC(CC(=O)O2)CC(=O)N)C	10923981								Organic compounds	Organoheterocyclic compounds	Lactones	Delta valerolactones	Delta valerolactones	261876	307800	254342	226043	202765	272804	348642	230959	281593	276750	569654	619665	591870	698108	553148	557582	577642	571553	530306	450887	54779	29911	47450	38451	31070
658	9.70_217.12	217.119	9.696	[M-H]-	MSI 2	biogenic amines	3-(Octylsulfanyl)propanoic acid	OIXUWMYLRUBAHK-UHFFFAOYSA-N	218.358	C11H22O2S	CCCCCCCCSCCC(=O)O	81416								Organic compounds	Lipids and lipid-like molecules	Fatty Acyls	Fatty acids and conjugates	Straight chain fatty acids	33242	34750	25681	31614	21747	34186	43532	31700	36035	31475	89249	74347	85586	81303	91638	93833	86251	80304	73467	76272	309408	224353	319321	237210	272380
659	5.12_703.54	703.541	5.118	[M-H]-	MSI 2	lipidomics	PE-Cer 36:1;3O|PE-Cer 19:0;2O/17:1;O	XOWXQFOERLRUGH-UHFFFAOYSA-N												Organic compounds	Lipids and lipid-like molecules	Sphingolipids	Phosphosphingolipids	PE-Cer	18314	8937	4445	9619	20445	12804	11339	8209	4908		98692	77616	93363	53050	109915	72845	78185	89772	96326	109876	255528	222408	251466	205116	245659
660	1.79_299.22	299.222	1.793	[M-H]-	MSI 2	lipidomics	FA 17:1;2O	AZANSJCEQIAFGI-UHFFFAOYSA-N												Organic compounds	Lipids and lipid-like molecules	Fatty Acyls	Fatty acids and conjugates	Fatty acids	76570	119434	43963	113848	86221	68253	56418	58199	58742	60257	220247	240562	329824	293472	237341	181149	224664	189284	183527	268264	815263	1111872	818854	808497	739998
661	6.22_301.25	301.253	6.216	[M+H]+	MSI 2	polyphenols	5.alpha.-Pregn-2-en-20-one	PERPPAKFLWZECF-QYYVTAPASA-N	300.479	C21H32O	CC(=O)[C@H]1CC[C@@H]2[C@@]1(CC[C@H]3[C@H]2CC[C@@H]4[C@@]3(CC=CC4)C)C	246883		C15420				CHEBI:79921		Organic compounds	Lipids and lipid-like molecules	Sterol lipids	Pregnane steroids	Pregnane steroids	34493440	81927707	81299835	44759995	53111494	88816540	41620318	78374414	36034278	48985187	16445605	18539498	16433578	23535828	23275752	22175503	18552617	24262474	24017550	15972661	310892380	375029891	417261001	465606844	505544226
662	5.97_556.51	556.508	5.967	[M+H-H2O]+	MSI 2	lipidomics	Cer 37:4;O2|Cer 18:0;O2/19:4	HVSNZPYVRYMJAE-UHFFFAOYSA-N												Organic compounds	Lipids and lipid-like molecules	Sphingolipids	Ceramides	Long-chain ceramides	33414	21639	23033	15349	17309	12139	30482	31488	22581	9443	46147	64367	70050	16678	65549	63300	75360	74667	69214	68130
663	2.17_328.32	328.321	2.172	[M+H]+	MSI 2	biogenic amines	N,N-Dimethylsphingosine	YRXOQXUDKDCXME-YIVRLKKSSA-N	327.546	C20H41NO2	CCCCCCCCCCCCC/C=C/[C@H]([C@H](CO)N(C)C)O	5282309		C13914	LMSP01070001			CHEBI:78759		Organic compounds	Organic nitrogen compounds	Organonitrogen compounds	Amines	Alkanolamines	48357	89600	36640	53973	72098	61990	105202	51295	1985	86519	36563	29690	59241	69469	49857	22689	66222	52553	37057	2060	309588	323689	325467	337899	355141
664	6.12_273.22	273.222	6.12	[M+H-CH6O4]+	MSI 2	polyphenols	5-[5-Hydroxy-3-(hydroxymethyl)pentyl]-8a-(hydroxymethyl)-5,6-dimethyl-3,4,4a,6,7,8-hexahydronaphthalene-1-carboxylic acid	VOCJFEUCJDTXSA-UHFFFAOYSA-N	354.482	C20H34O5	CC1CCC2(C(C1(C)CCC(CCO)CO)CCC=C2C(=O)O)CO	57509450								Organic compounds	Lipids and lipid-like molecules	Prenol lipids	Diterpenoids	Colensane and clerodane diterpenoids	576632	1327617	1282034	701840	768656	1291076	541720	1024097	575198	693006	227855	355985	283026	335824	235362	333951	345247	205961	346490	256633	7823817	8213956	10237960	10888353	11287254
665	1.61_148.08	148.076	1.614	[M+H]+	MSI 2	polyphenols	Indole-3-carbinol	IVYPNXXAYMYVSP-UHFFFAOYSA-N	147.174	C9H9NO	C1=CC=C2C(=C1)C(=CN2)CO	3712	HMDB0005785				31447	CHEBI:24814	CPDQT-428	Organic compounds	Organoheterocyclic compounds	Indoles and derivatives	Indoles	3-alkylindoles	31619	64887	74034	33118	91645	112912	26598	108690	40831	75764	150703	170217	79070	137330	153953	161740	168309	155431	146126	138859	566707	716004	545479	797717	784168
666	9.04_664.66	664.66	9.045	[M+H]+	MSI 2	lipidomics	Cer 43:1;O2|Cer 18:1;O2/25:0	QHPYSHVSWAOLHS-UHFFFAOYSA-N	664.142	C43H85NO3	CCCCCCCCCCCCCCCCCCCCCCCCC(=O)NC(CO)C(C=CCCCCCCCCCCCCC)O	54228626								Organic compounds	Organic oxygen compounds	Organooxygen compounds	Alcohols and polyols	Secondary alcohols	31051	32619	31096	26435	16526	19567	32942	22399	38591	31342	30158	55215	47730	46250	51787	29461	51356	47593	60119	52810	184709	200180	159510	171461	185988
667	8.10_206.08	206.085	8.102	[M+H]+	MSI 2	biogenic amines	Indolelactic acid	XGILAAMKEQUXLS-UHFFFAOYSA-N	205.21	C11H11NO3	C1=CC=C2C(=C1)C(=CN2)CC(C(=O)O)O	92904	HMDB0000671	C02043				CHEBI:24813		Organic compounds	Organoheterocyclic compounds	Indoles and derivatives	Indolyl carboxylic acids and derivatives	Indolyl carboxylic acids and derivatives	277054	278554	202731	245552	177087	260065	365825	203539	232258	246143	663958	657251	698671	727094	617453	637141	625927	693588	580468	702766	66396	37873	49153	39856	33673
668	0.77_263.17	263.165	0.774	[M-H]-	MSI 2	lipidomics	FA 16:4;O	VJDWEEHZIYVLHJ-UHFFFAOYSA-N												Organic compounds	Lipids and lipid-like molecules	Fatty Acyls	Fatty acids and conjugates	Fatty acids	303277	288689	382922	358332	345644	383054	236501	454904	222313	379530	318911	342135	414417	362715	347400	351384	407092	253161	399571	450342	6090		6975	50386	50591
669	5.33_559.43_5.34_554.48	559.4335_554.4782	5.329_5.337	[M+Na]+_[M+NH4]+	MSI 2	lipidomics	DG 30:2|DG 12:0_18:2	BYSRPAGGVIYRKS-UHFFFAOYSA-N												Organic compounds	Lipids and lipid-like molecules	Glycerolipids	Diradylglycerols	DG	375913	340932	305012	278072	326236	312152	319321	328591	359683	308713	626998	535342	694127	374979	659277	627538	749468	566135	534258	698580	4082226	4967750	6176463	4750736	4180085
670	6.40_285.18	285.181	6.402	[M+H-H2O]+	MSI 2	biogenic amines	6.beta.-Hydroxy-17.alpha.-boldenone	VLTNWNUPWHBSQY-HXEWTNOOSA-N	302.188	C19H26O3	C[C@]12CC[C@H]3[C@H]([C@@H]1CC[C@H]2O)C[C@H](C4=CC(=O)C=C[C@]34C)O	131668010								Organic compounds	Lipids and lipid-like molecules	Sterol lipids	Androstane steroids	Androgens and derivatives	469411	537380	378221	438785	360292	503109	637392	448951	443618	443509	1013364	1120254	971736	1247777	1014184	951555	1245471	1083876	1005330	953727	102169	78370	111926	78141	112010
671	8.31_233.11	233.113	8.307	[M+H-H2O]+	MSI 2	biogenic amines	1H-2-Benzopyran-1-one, 3,4-dihydro-8-hydroxy-3-(4-hydroxypentyl)-	JDIGWVAMJGGRBY-UHFFFAOYSA-N	250.291	C14H18O4	CC(CCCC1CC2=C(C(=CC=C2)O)C(=O)O1)O	23786292								Organic compounds	Organoheterocyclic compounds	Benzopyrans	2-benzopyrans	2-benzopyrans	5964800	7022100	5115120	5576768	4667219	5902409	7481518	5521283	6152150	6044777	11569549	11538702	10990125	11671491	11176062	10100567	11339795	11121771	11512202	11044764	1327778	936710	1123656	997501	1151005
672	6.36_593.28	593.277	6.363	[M+H]+	MSI 2	polyphenols	Pheophorbide a	RKEBXTALJSALNU-LDCXZXNSSA-N	592.696	C35H36N4O5	CCC1=C(C2=NC1=CC3=C(C4=C([C@@H](C(=C5[C@H]([C@@H](C(=CC6=NC(=C2)C(=C6C)C=C)N5)C)CCC(=O)O)C4=N3)C(=O)OC)O)C)C	253193								Organic compounds	Organoheterocyclic compounds	Tetrapyrroles and derivatives		Tetrapyrroles and derivatives	7179672	14557793	12680217	5860895	9990520	18200632	6789375	16606466	4511436	10790691	18966537	22940819	11924610	21636349	25438140	21131729	18135652	23684838	19770443	17513535	2113495	3113324	2750565	5019620	3191635
673	8.62_389.19	389.192	8.619	[M+Na]+	MSI 2	biogenic amines	20-Carboxy-LTB4	SXWGPVJGNOLNHT-VFLUTPEKSA-N	366.449	C20H30O6	C(CCC(=O)O)C/C=C\C[C@H](/C=C/C=C/C=C\[C@H](CCCC(=O)O)O)O	5280877	HMDB0006059	C05950	LMFA03020016			CHEBI:27562		Organic compounds	Lipids and lipid-like molecules	Fatty Acyls	Fatty acids and conjugates	Long-chain fatty acids	2083447	2216598	1443507	1933204	1289468	1797897	2369708	1834643	2125163	1844677	3375171	3727781	4156755	3141653	2750166	3697769	3728799	3688283	3222637	2922307	365654	211938	286202	290621	355340
674	3.81_484.44	484.436	3.809	[M+H]+	MSI 2	lipidomics	CAR 22:0	IUMXSSOVGPXXJL-UHFFFAOYSA-N	483.768	C29H57NO4	CCCCCCCCCCCCCCCCCCCCCC(=O)OC(CC(=O)[O-])C[N+](C)(C)C	71464577	HMDB0062468					CHEBI:73105		Organic compounds	Lipids and lipid-like molecules	Fatty Acyls	Fatty acid esters	Acyl carnitines	75195	87586	80619	57877	97494	85543	58299	64310	90043	90886	184493	212263	256740	224704	232647	262587	260997	204938	237800	287406	791659	840784	804311	724712	815235
675	6.24_309.18	309.181	6.243	[M+H]+	MSI 2	biogenic amines	Nitracaine	SPTIETJWCCCJSE-UHFFFAOYSA-N	308.378	C16H24N2O4	CCN(CC)CC(C)(C)COC(=O)C1=CC=C(C=C1)[N+](=O)[O-]	91936940								Organic compounds	Benzenoids	Benzene and substituted derivatives	Benzoic acids and derivatives	Nitrobenzoic acids and derivatives	7413815	8379884	6385677	7156895	6221499	7950570	10953572	6742316	6374017	8298890	14974401	15497263	19954181	17591937	17684721	17836364	16833908	18721686	14569432	15231112	1313767	1029363	1397353	1271877	1830750
676	3.79_166.12	166.123	3.788	[M+H]+	MSI 2	biogenic amines	4-Amino-2-isopropyl-5-methylphenol	RGRUKJFIPJHWNL-UHFFFAOYSA-N	165.233	C10H15NO	CC1=CC(=C(C=C1N)C(C)C)O	70781								Organic compounds	Lipids and lipid-like molecules	Prenol lipids	Monoterpenoids	Aromatic monoterpenoids	90657	117347	73101	85270	58519	94397	125614	102488	123736	85194	203896	197195	274264	258965	237860	276046	268465	246905	194176	281606	1001804	687584	918326	863735	1225043
677	1.56_311.26	311.259	1.562	[M-H]-	MSI 2	lipidomics	FA 19:1;O	ZMFQHSWMBZVMNI-UHFFFAOYSA-N												Organic compounds	Lipids and lipid-like molecules	Fatty Acyls	Fatty acids and conjugates	Long-chain fatty acids	217830	498439	342176	233435	333946	276527	244696	270582	282763	280965	50680	75454	771421	722927	689056	514822	357350	522454	543675	478487	1477854	1534644	1660849	1771032	1519282
678	4.11_649.48	649.484	4.11	[M-H]-	MSI 2	lipidomics	EPC 32:0;O2;O	FTXARVPGEATRQM-UHFFFAOYSA-N												Organic compounds	Lipids and lipid-like molecules	Sphingolipids	Phosphosphingolipids	PE-Cer	450975	486065	532699	530826	380444	582864	352061	519148	486940	460531	934833	785204	821826	992554	618435	700024	875798	773934	689420	830875	94370	71791	92527	66655	64998
679	10.15_918.81_10.16_939.74	918.8114_939.7404	10.152_10.160	[M+NH4]+_[M+K]+	MSI 2	lipidomics	TG 54:3;1O|TG 18:0_18:1_18:2;1O	XFDFINMSLVPSOY-UHFFFAOYSA-N												Organic compounds	Lipids and lipid-like molecules	Glycerolipids	Triradylcglycerols	TG	101294	291318	165434	110541	258029	212119	16023	125741	236408	78007	8462	1133			9312		8732	7877	7081	90691	1828350	899655	1777398	1423411	956282
680	7.45_243.15	243.145	7.454	[M+H]+	MSI 2	biogenic amines	5-(1-Piperidinylmethyl)-8-quinolinol	LZFBSWZQNARANH-UHFFFAOYSA-N	242.317	C15H18N2O	C1CCN(CC1)CC2=C3C=CC=NC3=C(C=C2)O	279619								Organic compounds	Organoheterocyclic compounds	Quinolines and derivatives	8-hydroxyquinolines	8-hydroxyquinolines	1242391	1376580	1096269	1124273	880639	1290423	1688729	1084845	1165635	1197949	2677054	2764894	3112773	2966841	2399875	2767148	2484990	2416412	2383118	2558258	245911	198691	257156	249161	294327
681	1.03_335.24	335.236	1.03	[M-H]-	MSI 2	lipidomics	FA 20:4;2O	WTTRVKVOOJHCSN-UHFFFAOYSA-N												Organic compounds	Lipids and lipid-like molecules	Fatty Acyls	Fatty acids and conjugates	Fatty acids	2787482	5582758	802655	5123632	1602123	1043196	1024757	1159790	534117	671100	10580454	13318201	10749068	12875925	9837908	10142898	3231628	4992371	9131951	2042704	36352212	34516822	34452716	29246056	27877154
682	3.81_308.11	308.111	3.815	[M+H]+	MSI 2	biogenic amines	Tolnaftate	FUSNMLFNXJSCDI-UHFFFAOYSA-N	307.411	C19H17NOS	CC1=CC(=CC=C1)N(C)C(=S)OC2=CC3=CC=CC=C3C=C2	5510	HMDB0005005	D00381		DB00525		CHEBI:9620		Organic compounds	Benzenoids	Naphthalenes		Naphthalenes	837710	850221	845404	944243	757722	884673	844865	828312	862352	974405	858427	759841	868918	882235	873997	1074203	1021387	1116876	1030134	1311066	122986	95633	124558	103370	121638
683	6.79_520.51	520.51	6.792	[M+H-H2O]+	MSI 2	polyphenols	N-Palmitoyl-D-sphingosine	YDNKGFDKKRUKPY-ORIPQNMZSA-N	537.902	C34H67NO3	CCCCCCCCCCCCCCCC(=O)NC(CO)C(/C=C/CCCCCCCCCCCCC)O	5353456	HMDB0000790							Organic compounds	Lipids and lipid-like molecules	Sphingolipids	Ceramides	Ceramides	313184	427838	404991	364690	342667	427161	221999	474359	187712	266283	479553	599771	337793	504519	642635	476424	496195	610262	508186	488846	2108052	2672895	3070974	4168404	3545016
684	7.49_275.20	275.197	7.489	[M+H]+	MSI 2	biogenic amines	17.alpha.-Nandrolone	NPAGDVCDWIYMMC-SHRADXDESA-N	274.399	C18H26O2	C[C@]12CC[C@H]3[C@H]([C@@H]1CC[C@H]2O)CCC4=CC(=O)CC[C@H]34	6451993								Organic compounds	Lipids and lipid-like molecules	Sterol lipids	Estrane steroids	Estrogens and derivatives	77475	104990	67355	50516	51031	55784	106754	52679	38755	55180	262115	270231	307944	306319	208590	279993	223682	230487	189559	191670	1014825	640130	1002202	738102	994348
685	5.72_337.11	337.108	5.723	[M+H-H2O]+	MSI 2	polyphenols	Asarinin	PEYUIKBAABKQKQ-FQZPYLGXSA-N	354.354	C20H18O6	C1[C@@H]2[C@@H](CO[C@@H]2C3=CC4=C(C=C3)OCO4)[C@@H](O1)C5=CC6=C(C=C5)OCO6	11869417								Organic compounds	Lignans, neolignans and related compounds	Furanoid lignans		Furanoid lignans	63989	164155	81353	29146	132658	92292	136574	439404	1449896	67448	117048	128266	24814	85677	242243	224583	100502	146422	109301	138625		14853
686	1.47_148.08	148.076	1.468	[M+H-C8H11N]+	MSI 2	polyphenols	Ethyl centralite	PZIMIYVOZBTARW-UHFFFAOYSA-N	268.354	C17H20N2O	CCN(C1=CC=CC=C1)C(=O)N(CC)C2=CC=CC=C2	6828					31688			Organic compounds	Benzenoids	Benzene and substituted derivatives	N-phenylureas	N-phenylureas	50909	43565	56653	24719	46562	99827	16093	78998	36252	57054	123531	131176	85781	105688	127973	99737	139133	128749	97387	82403	396704	565981	356857	552341	519172
687	9.87_892.83	892.827	9.868	[M+NH4]+	MSI 2	lipidomics	TG 53:1|TG 16:0_19:0_18:1	UTEQTZMSLZVDRN-UHFFFAOYSA-N												Organic compounds	Lipids and lipid-like molecules	Glycerolipids	Triradylcglycerols	TG	12255	52499	37709	170894	14546	281921	14239	6834	122257	117214	71050	61250	108123	25458	56601	49378	69702	64997	94030	97250	258007	184603	183063	186823	331121
688	3.59_496.44	496.436	3.586	[M+H]+	MSI 2	lipidomics	CAR 23:1	DTQFHIGRBSFXNG-UHFFFAOYSA-N												Organic compounds	Lipids and lipid-like molecules	Fatty Acyls	Fatty esters	Fatty acyl carnitines	20658	22832	10940	7950	6947	10131	13952	9216	6186	11686	4426	10046	17707		28441	5987	14777	11978	19440	25236	67770		53219	62015	53573
689	4.00_715.53	715.528	4	[M+Na]+	MSI 2	lipidomics	DG 42:8	RMEUSPDWGQLTRX-UHFFFAOYSA-N												Organic compounds	Lipids and lipid-like molecules	Glycerolipids	Diradylglycerols	DG											9091	10779	8409			10661			11622	10126	17064		31322	27113	11597
690	5.70_591.32	591.319	5.696	[M+H]+	MSI 2	polyphenols	L-Urobilin	TYOWQSLRVAUSMI-WKULSOCRSA-N	594.743	C33H46N4O6	CCC1C(C(=O)NC1CC2=N/C(=C/C3=C(C(=C(N3)CC4C(C(C(=O)N4)CC)C)C)CCC(=O)O)/C(=C2C)CCC(=O)O)C	5280818	HMDB0004159							Organic compounds	Organoheterocyclic compounds	Tetrapyrroles and derivatives	Bilirubins	Bilirubins	1746995	1848718	2890229	1540283	2394267	3191065	1108130	2670895	1412157	1904764	3265888	4086772	2426751	2847721	3945485	3130241	3141200	3249188	3163771	2615634	15647610	22326268	11924300	18414088	28308797
691	0.78_403.23	403.231	0.781	[M+H]+	MSI 2	polyphenols	Ile-Asp-Arg	UMYZBHKAVTXWIW-GMOBBJLQSA-N	402.223	C16H30N6O6	CC[C@H](C)[C@@H](C(=O)N[C@@H](CC(=O)O)C(=O)N[C@@H](CCCN=C(N)N)C(=O)O)N	145456076								Organic compounds	Organic acids and derivatives	Carboxylic acids and derivatives	Amino acids, peptides, and analogues	Peptides	20435		11548	6123	11616	23342		27169		29023	96084	128148	45065	40123	75097	52571	108809	24593	76434	77506	121359	181548	58778	226041	104009
692	5.86_417.26	417.262	5.864	[M+Na]+	MSI 2	polyphenols	Prostaglandin E2 isopropyl ester	NOHLKSJQMSPOTB-FZNVCOGTSA-N	394.552	C23H38O5	CCCCC[C@@H](/C=C/[C@H]1[C@@H](CC(=O)[C@@H]1C/C=C\CCCC(=O)OC(C)C)O)O	71684700								Organic compounds	Lipids and lipid-like molecules	Fatty Acyls	Eicosanoids	Prostaglandins and related compounds	322552	657497	646465	539004	576842	657438	572179	676380	408325	457889	33002	54371	36430	50233	70663	83511	41260	70415	26284	33502	4207934	4144379	5525557	4718686	6305973
693	1.14_347.22	347.222	1.139	[2M+K]+	MSI 1	biogenic amines	Corticosterone	OMFXVFTZEKFJBZ-HJTSIMOOSA-N	346.461	C21H30O4	C[C@]12CCC(=O)C=C1CC[C@@H]3[C@@H]2[C@H](C[C@]4([C@H]3CC[C@@H]4C(=O)CO)C)O	5753	HMDB0001547	C02140	LMST02030186	DB04652	22474	CHEBI:16827	CORTICOSTERONE	Organic compounds	Lipids and lipid-like molecules	Sterol lipids	Hydroxysteroids	21-hydroxysteroids	4006		4732		10954	6417		5747			18056	13991	12269	22973	7047	19130	13098	12155	14933	11962	68681	38895	73943	58599	82502
694	1.79_253.22	253.217	1.795	[M-H]-	MSI 1	lipidomics	FA 16:1 (palmitoleic acid)	SECPZKHBENQXJG-FPLPWBNLSA-N	254.409	C16H30O2	CCCCCC/C=C\CCCCCCCC(=O)O	445638	HMDB0003229	C08362	LMFA01030056			CHEBI:28716		Organic compounds	Lipids and lipid-like molecules	Fatty Acyls	Fatty acids and conjugates	Long-chain fatty acids	26945775	29172629	24436253	36808837	35531373	29376625	21003283	36459056	26131758	35711549	61093038	75019887	84969092	88540290	75307472	58881315	67799591	63309436	69136220	85702197	237486660	301774776	252601113	266861407	233746126
695	4.63_282.28	282.279	4.633	[M+H-H2O]+	MSI 2	biogenic amines	2S-Amino-4E-octadecene-1,3S-diol	WWUZIQQURGPMPG-DNWQSSKHSA-N	299.493	C18H37NO2	CCCCCCCCCCCCC/C=C/[C@@H]([C@H](CO)N)O	11130338								Organic compounds	Organic nitrogen compounds	Organonitrogen compounds	Amines	Alkanolamines	37293		6477		87854		4383	8630		6724	10680			36910	14606	11520		6823	39040	9712	20546	27075	15319	18835	72042
696	6.00_199.17	199.17	6	[M+H]+	MSI 2	polyphenols	.delta.-Dodecalactone	QRPLZGZHJABGRS-UHFFFAOYSA-N	198.302	C12H22O2	CCCCCCCC1CCCC(=O)O1	12844	HMDB0037742		LMFA07040040					Organic compounds	Organoheterocyclic compounds	Lactones	Delta valerolactones	Delta valerolactones	1325202	2376531	2540323	1370606	1772204	3228692	2227123	2932343	1435369	4183430	2077824	2403186	1421620	2178928	2965925	2522711	2156234	2779754	2139855	1750813	8847428	13336159	19193587	17784991	14900393
697	2.40_377.27	377.27	2.397	[M-H]-	MSI 2	lipidomics	FAHFA 23:3;O|FAHFA 6:0/17:3;O	KMPKYPUJKUPJMS-UHFFFAOYSA-N												Organic compounds	Lipids and lipid-like molecules	Fatty Acyls	Fatty acids and conjugates	Long-chain fatty acids	9017683	12889988	6125497	7505884	7202288	9625923	8678529	9951128	6093169	6882485	4003946	5693360	5905692	5257812	5986814	4714972	6225894	4092328	3705255	5933913	56334683	51155697	61209215	43263480	56837820
698	3.39_465.35	465.351	3.387	[M+Na]+	MSI 2	lipidomics	DG 23:0	WJDHKDCFZWCXJC-UHFFFAOYSA-N												Organic compounds	Lipids and lipid-like molecules	Glycerolipids	Diradylglycerols	DG	32928	48924	38247	42328	44455	31113	33045	59114	39312	33077	46629	47057	54933	62785	31934	42194	48889	51528	66528	58402	378723	450822	321371	371762	303840
699	1.52_554.35	554.346	1.523	[M+CH3COO]-	MSI 1	lipidomics	LPC 16:0	ASWBNKHCZGQVJV-HSZRJFAPSA-N	495.631	C24H50NO7P	CCCCCCCCCCCCCCCC(=O)OC[C@H](COP(=O)([O-])OCC[N+](C)(C)C)O	460602	HMDB0010382		LMGP01050018			CHEBI:72998	CPD-8343	Organic compounds	Lipids and lipid-like molecules	Glycerophospholipids	Glycerophosphocholines	Lysophosphatidylcholines	40371	28074	80140	62695	22791	54793	32704	85931	27193	165042									33805	9547	249352	343196	266376	533169	380533
700	6.53_331.19	331.192	6.53	[M+H]+	MSI 2	polyphenols	Carnosol	XUSYGBPHQBWGAD-PJSUUKDQSA-N	330.419	C20H26O4	CC(C)C1=C(C(=C2C(=C1)[C@@H]3C[C@@H]4[C@@]2(CCCC4(C)C)C(=O)O3)O)O	442009	HMDB0002121	C09069				CHEBI:3429		Organic compounds	Lipids and lipid-like molecules	Prenol lipids	Terpene lactones	Diterpene lactones	45768	229498	204150	49048	86995	150849	34117	156889	61235	76206	62837	241652	7587	127461	140989	85981	137157	61233	78191	40741	83589	11444	9836
701	6.00_153.13	153.128	6	[M+H-H2O]+	MSI 2	polyphenols	.gamma.-Decalactone	IFYYFLINQYPWGJ-UHFFFAOYSA-N	170.249	C10H18O2	CCCCCCC1CCC(=O)O1	12813	HMDB0037217				22109			Organic compounds	Organoheterocyclic compounds	Lactones	Gamma butyrolactones	Gamma butyrolactones	1129194	1830113	2028154	1088436	1449283	2757274	1777050	2542743	1258628	3637553	1756673	1993245	1209133	1805454	2387098	1943735	1866298	2092949	1804117	1463033	8045974	11522616	16901665	14375398	12368986
702	3.19_714.57	714.569	3.187	[M-H]-	MSI 2	lipidomics	SL 41:1;2O	HZSUWOHKROULPS-UHFFFAOYSA-N												Organic compounds	Lipids and lipid-like molecules	Sphingolipids	Sphingoid bases	SL	180285	213683	142081	170800	143424	129973	173032	214192	158388	184731	518516	612058	614677	630613	508011	504139	376246	445511	310679	462254	1653554	1728257	1465062	1417624	1199816
703	11.78_982.88_11.78_987.84	982.8801_987.8357	11.778_11.782	[M+NH4]+_[M+Na]+	MSI 1	lipidomics	TG 60:5|TG 24:0_18:2_18:3	NCTGMGBJXWCUSU-UHFFFAOYSA-N												Organic compounds	Lipids and lipid-like molecules	Glycerolipids	Triradylcglycerols	TG	764994	1089696	1439512	916878	2184319	1436836	1634982	1258144	1414039	971675	39678	39445	413305	277641	70021	180120	274004	31745	74817	163652	373444	197260	504992	64826	211710
704	1.42_225.08	225.08	1.416	[M-H]-	MSI 2	biogenic amines	4,8-Dihydroxy-3,7,8-trimethyl-5,7-dihydropyrano[4,3-b]pyran-2-one	LORTWVPBXJUYJM-UHFFFAOYSA-N	226.226	C11H14O5	CC1C(C2=C(CO1)C(=C(C(=O)O2)C)O)(C)O	54749171								Organic compounds	Organoheterocyclic compounds	Pyrans	Pyranones and derivatives	Pyranones and derivatives	251383	282819	168750	181746	179397	211499	346843	196864	273381	234892	502250	585971	575594	511537	479317	629058	579502	428996	505355	501092	1878258	1117568	1614090	1973781	1797865
705	389051	180	381532	[M]*+	MSI 1	primary metabolism	Picolinic acid	SIOXPEMLGUPBBT-UHFFFAOYSA-N	123.11	C6H5NO2	C1=CC=NC(=C1)C(=O)O	1018	HMDB0002243	C10164			31904	CHEBI:28747		Organic compounds	Organoheterocyclic compounds	Pyridines and derivatives	Pyridinecarboxylic acids and derivatives	Pyridinecarboxylic acids	3714	3715	3799	4832	2688	4489	4319	4097	3016	4040	4750	5888	5778	7706	7863	5679	4341	8434	5350	3121	31633	27069	31926	34946	29270
706	6.22_379.29	379.285	6.218	[2M+H]+	MSI 1	polyphenols	MG 18:1	RZRNAYUHWVFMIP-KTKRTIGZSA-N	356.541	C21H40O4	CCCCCCCC/C=C\CCCCCCCC(=O)OCC(CO)O	5283468	HMDB0094684		LMGL01010005			CHEBI:75342		Organic compounds	Lipids and lipid-like molecules	Glycerolipids	Monoradylglycerols	Monoacylglycerols	15877856	36939815	36992803	20748372	23748652	38535421	20235318	36209525	16083480	22817249	7218186	7810288	7544674	10431163	9794782	9708471	8187104	10216628	10075706	6977391	135836520	163833895	177946672	202550758	223527317
707	5.08_882.61	882.615	5.075	[M+NH4]+	MSI 2	lipidomics	DGDG 30:0|DGDG 14:0_16:0	RHHXWKPNZITYHO-UHFFFAOYSA-N	864.581	C45H84O15	CCCCCCCCCCCCCCCC(=O)OC(COC1C(C(C(C(O1)COC2C(C(C(C(O2)CO)O)O)O)O)O)O)COC(=O)CCCCCCCCCCCCC	132996312								Organic compounds	Lipids and lipid-like molecules	Glycerolipids	Glycosylglycerols	Glycosyldiradylglycerols	7284			7914												13102	7222			10173	23780	19868	43986	19582	37383
708	6.00_283.26	283.264	5.999	[M+H]+	MSI 2	polyphenols	trans-Vaccenic acid	UWHZIFQPPBDJPM-BQYQJAHWSA-N	282.462	C18H34O2	CCCCCC/C=C/CCCCCCCCCC(=O)O	5281127	HMDB0240219	C08367	LMFA01030077			CHEBI:28727		Organic compounds	Lipids and lipid-like molecules	Fatty Acyls	Fatty acids and conjugates	Long-chain fatty acids	109625538	179785808	194966504	99739307	145184440	267980460	166986958	238690440	118686370	353943678	168440107	192990786	113199958	173860109	217847127	190894236	173742704	217412756	166939049	142346288	749705146	1076242635	1588301752	1365067975	1167312768
709	7.65_160.10	160.097	7.648	[M+H]+	MSI 2	biogenic amines	Betonicine	MUNWAHDYFVYIKH-RITPCOANSA-N	159.183	C7H13NO3	C[N+]1(C[C@@H](C[C@H]1C(=O)[O-])O)C	164642	HMDB0029412	C08269				CHEBI:81	CPD-17183	Organic compounds	Organic acids and derivatives	Carboxylic acids and derivatives	Amino acids, peptides, and analogues	Amino acids and derivatives	457601	431661	311804	510382	287286	343137	502550	332869	314968	332330	965133	991461	1120698	950983	785237	957407	827916	774601	782360	786445	3957839	2711458	3830508	3772736	4591540
710	6.00_247.24	247.243	5.999	[M+H-2H2O]+	MSI 2	polyphenols	cis-Vaccenic acid	UWHZIFQPPBDJPM-FPLPWBNLSA-N	282.462	C18H34O2	CCCCCC/C=C\CCCCCCCCCC(=O)O	5282761	HMDB0003231		LMFA01030076	DB04801		CHEBI:50464		Organic compounds	Lipids and lipid-like molecules	Fatty Acyls	Fatty acids and conjugates	Long-chain fatty acids	7670503	13030103	13853345	7319369	10207776	18699429	12094670	16586278	8464953	25641483	12012458	13521893	8344974	12702642	16617159	13523343	12575124	15353847	12309749	9687500	54345519	78155221	116156290	103857204	85005230
711	6.09_368.22	368.223	6.095	[M+H]+	MSI 2	polyphenols	Piperundecalidine	BADLEYLQAILHPV-AZMZBSBOSA-N	367.482	C23H29NO3	C1CCN(CC1)C(=O)/C=C/C=C/CCCC/C=C/C2=CC3=C(C=C2)OCO3	44453654	HMDB0030240							Organic compounds	Organoheterocyclic compounds	Benzodioxoles		Benzodioxoles	3482392	395934	248480	672707	135431	267607	437275	223690	48251	503414	279721	422944	284326	532913	292052	375090	269904	970616	190567	246867			34342
712	10.02_349.17	349.172	10.017	[M+H]+	MSI 2	biogenic amines	Ser-Asp-Lys	BYIROAKULFFTEK-CIUDSAMLSA-N	348.353	C13H24N4O7	C(CCN)C[C@@H](C(=O)O)NC(=O)[C@H](CC(=O)O)NC(=O)[C@H](CO)N	9819698								Organic compounds	Organic acids and derivatives	Carboxylic acids and derivatives	Amino acids, peptides, and analogues	Peptides	31273	24617	10642	28394	21033	24968	39410	16855	11234	8312	33623	39724	51383	23583	55006	42960	49441	51392	13432	50431	282499	159445	177483	207555	262929
713	6.00_167.14	167.143	6	[M+H-CH4O3]+	MSI 2	polyphenols	Dodecanedioic acid	TVIDDXQYHWJXFK-UHFFFAOYSA-N	230.301	C12H22O4	C(CCCCCC(=O)O)CCCCC(=O)O	12736	HMDB0000623	C02678	LMFA01170009		27298	CHEBI:4676		Organic compounds	Lipids and lipid-like molecules	Fatty Acyls	Fatty acids and conjugates	Medium-chain fatty acids	1360110	2131320	2419078	1267217	1805019	3343933	2149523	2909756	1437202	4241830	2060761	2442416	1371102	2097994	2728219	2372587	2335874	2829708	2160167	1650143	8676066	13392110	19080324	17544281	14230862
714	6.00_213.19	213.185	6	[M+H]+	MSI 2	polyphenols	cis-11-Methyl-2-dodecenoic acid	SNTXNGAQYNSTHI-LUAWRHEFSA-N	212.329	C13H24O2	CC(C)CCCCCCC/C=C\C(=O)O	11469920		C18206				CHEBI:81585		Organic compounds	Lipids and lipid-like molecules	Fatty Acyls	Fatty acids and conjugates	Medium-chain fatty acids	1548561	2530238	2696619	1392195	1983058	3592635	2346292	3273228	1635001	5068648	2360865	2745132	1607395	2492520	3136076	2640150	2430385	3201736	2499415	1909331	10593014	15169879	22077350	19818012	16293614
715	9.27_866.72_9.27_871.68	866.7235_871.6788	9.273_9.267	[M+NH4]+_[M+Na]+	MSI 2	lipidomics	TG 52:7|TG 16:1_18:3_18:3	LROSQJOAECQISB-UHFFFAOYSA-N	848.689	C55H92O6	CCCCCCC=CCCCCCCCC(=O)OCC(COC(=O)CCCCCCCC=CCC=CCC=CCC)OC(=O)CCCCCCCC=CCC=CCC=CCC	85034472								Organic compounds	Lipids and lipid-like molecules	Glycerolipids	Triradylcglycerols	TG	1605288	1285202	2434539	831676	3875708	1620460	5622253	1906760	2132524	1474451	127497	163961	1801713	774218	165888	304679	425771	91013	205515	334612	660146	390108	1701234	316261	462248
716	1.35_389.24	389.241	1.348	[M+H]+	MSI 2	polyphenols	Glu-Ile-Lys	XTZDZAXYPDISRR-MNXVOIDGSA-N	388.232	C17H32N4O6	CC[C@H](C)[C@@H](C(=O)N[C@@H](CCCCN)C(=O)O)NC(=O)[C@H](CCC(=O)O)N	145455411								Organic compounds	Organic acids and derivatives	Carboxylic acids and derivatives	Amino acids, peptides, and analogues	Peptides		6151			12303		5819	10092	6194	20234	65384	50991	40291	29363	86382	44492	96985	70065	87053	40272	174927	242473	113960	212603	198727
717	6.22_361.27	361.275	6.218	[M+H-H2O]+	MSI 2	polyphenols	MG 20:4	RCRCTBLIHCHWDZ-DOFZRALJSA-N	378.546	C23H38O4	CCCCC/C=C\C/C=C\C/C=C\C/C=C\CCCC(=O)OC(CO)CO	5282280	HMDB0004666	C13856	LMGL01010023			CHEBI:52392		Organic compounds	Lipids and lipid-like molecules	Endocannabinoids		Endocannabinoids	5777236	13500790	13793270	7474907	8654075	14030112	6912228	13057128	5883732	8310919	2885266	3190649	2731392	4033830	4391019	4506239	3646614	4466705	4271220	3188108	51413997	61758587	67332739	75582205	83795795
718	6.00_209.19	209.19	6	[M+H-2H2O]+	MSI 2	polyphenols	14-Hydroxymyristic acid	JOSXCARTDOQGLV-UHFFFAOYSA-N	244.371	C14H28O3	C(CCCCCCC(=O)O)CCCCCCO	3084276			LMFA01050044			CHEBI:77168		Organic compounds	Lipids and lipid-like molecules	Fatty Acyls	Fatty acids and conjugates	Long-chain fatty acids	1505676	2313693	2596523	1342932	1916658	3499670	2255174	3071651	1542820	4622645	2155590	2519528	1543838	2463867	3028684	2648022	2321619	2783712	2353068	1830585	9428945	14350282	20361491	19507152	15646498
719	5.14_399.36	399.362	5.144	[M+H]+	MSI 2	lipidomics	ST 28:2;O	OILXMJHPFNGGTO-UHFFFAOYSA-N	398.665	C28H46O	CC(C)C(C)C=CC(C)C1CCC2C1(CCC3C2CC=C4C3(CCC(C4)O)C)C	86576								Organic compounds	Lipids and lipid-like molecules	Sterol lipids	Ergostane steroids	Ergosterols and derivatives	9073992	14322615	8482585	8950660	11274532	11183573	8733170	9242992	10763513	9682037	11098965	13935142	16501024	12836884	14133260	12674726	13311839	12476235	13986902	17071848	69786432	74103617	73002868	73333737	63797840
720	4.12_538.52	538.519	4.12	[M+H-H2O]+	MSI 2	lipidomics	Cer 34:0;O3|Cer 21:0;O2/13:0;O	FLEFOXRXSBQXEP-UHFFFAOYSA-N	555.523	C34H69NO4	CCCCCCCCCCCCCCCCCCC(C(CO)NC(=O)C(CCCCCCCCCCC)O)O	138153043								Organic compounds	Lipids and lipid-like molecules	Sphingolipids	Ceramides	Long-chain ceramides	22103	14599	6755	10451	4114	13136		9783	9046	9402	52941	43222	44316	20108	39160	57341	72190	53193	51849	52114	118808	38870	138598	112409	121329
721	1.43_272.13	272.128	1.429	[M+H]+	MSI 2	biogenic amines	Taxol side chain diol	OCRUDDLKDFDNGT-GJZGRUSLSA-N	271.316	C16H17NO3	C1=CC=C(C=C1)[C@@H]([C@H](CO)O)NC(=O)C2=CC=CC=C2	12986278								Organic compounds	Benzenoids	Benzene and substituted derivatives		Benzene and substituted derivatives	112242	113954	81641	89291	99454	65403	153239	91884	77021	110678	202947	278359	227034	230734	249781	265867	179045	240758	272032	289540	649237	1171594	770635	817188	1057820
722	5.19_193.12	193.123	5.194	[M+H-H2O]+	MSI 2	polyphenols	Jasmonic acid	ZNJFBWYDHIGLCU-HWKXXFMVSA-N	210.27	C12H18O3	CC/C=C\C[C@@H]1[C@H](CCC1=O)CC(=O)O	5281166	HMDB0032797	C08491	LMFA02020001		43043	CHEBI:18292		Organic compounds	Lipids and lipid-like molecules	Fatty Acyls	Lineolic acids and derivatives	Jasmonic acids	342634	396590	431942	258109	382013	608372	192781	564610	278635	311437	901808	1071578	698461	783640	958485	804312	840944	924718	848414	626340	72242	117161	71521	115953	91143
723	6.04_419.28	419.278	6.035	[M+Na]+	MSI 2	polyphenols	Prostaglandin F2.alpha. isopropyl ester	FPABVZYYTCHNMK-YNRDDPJXSA-N	396.562	C23H40O5	CCCCC[C@@H](/C=C/[C@H]1[C@@H](C[C@@H]([C@@H]1C/C=C\CCCC(=O)OC(C)C)O)O)O	5283077			LMFA03010076					Organic compounds	Lipids and lipid-like molecules	Fatty Acyls	Eicosanoids	Prostaglandins and related compounds	726824	1351456	1695841	952330	1137379	1979887	1178635	1961274	646986	1481570	127198	153597	123012	253233	215352	206617	238543	235547	304288	182346	6212715	6960552	8153321	9197556	10117652
724	1.33_299.19	299.187	1.329	[M-H]-	MSI 2	biogenic amines	13,14-Dihydro-15-ketotetranorprostaglandin F1.alpha.	UIZLUZTVNFGFMX-TUVASFSCSA-N	300.391	C16H28O5	CCCCCC(=O)CC[C@H]1[C@@H](C[C@@H]([C@@H]1CCC(=O)O)O)O	168168								Organic compounds	Lipids and lipid-like molecules	Fatty Acyls	Eicosanoids	Prostaglandins and related compounds	2567246	2504938	1148962	1934260	1334930	2023918	2347825	2173325	2605569	2306399	4565336	6751936	5721974	6064177	4691578	5464542	4550687	4678871	4555880	4730076	464724	288956	386331	377219	456601
725	3.60_770.52	770.518	3.605	[M+H]+	MSI 2	lipidomics	IPC 32:0;O2;O	PTUGNHVOYLRHDN-UHFFFAOYSA-N												Organic compounds	Lipids and lipid-like molecules	Sphingolipids	Ceramides	Ceramide phosphoinositols	11003		13266	15056		5330	11359	4801		10116	12372	21980	26444	15622	22535	25156	23177	9540	38277	15252	87154	24201	74643	78065	86224
726	6.00_223.21	223.206	6	[M+H]+	MSI 1	polyphenols	Guaiol(-)	TWVJWDMOZJXUID-SDDRHHMPSA-N	222.367	C15H26O	C[C@H]1CC[C@H](CC2=C1CC[C@@H]2C)C(C)(C)O	227829		C09676	LMPR0103410007			CHEBI:5552		Organic compounds	Lipids and lipid-like molecules	Prenol lipids	Sesquiterpenoids	Sesquiterpenoids	749914	1161158	1314975	675023	900478	1690445	1106545	1580128	731808	2156666	1056073	1183254	702408	1190612	1406417	1220660	1094805	1384406	1109152	867098	4447798	6468479	10115705	8805411	7683002
727	0.96_303.27	303.268	0.965	[M+H-C6H12O]+	MSI 2	biogenic amines	25(S)-26-Hydroxycholesterol	FYHRJWMENCALJY-VICXTREFSA-N	402.654	C27H46O2	C[C@@H](CCC[C@@H](C)[C@H]1CC[C@@H]2[C@@]1(CC[C@H]3[C@H]2CC=C4[C@@]3(CC[C@@H](C4)O)C)C)CO	13873476								Organic compounds	Lipids and lipid-like molecules	Sterol lipids	Bile acids, alcohols and derivatives	Hydroxy bile acids, alcohols and derivatives	4494460	336343	316113	68434	2520351	47191	182339	193459	149882	64789	489160	387700	378087	631223	375303	762799	18509046	859750	875235	282304	2298823	5706963	1285678	1542996	4435994
728	12.09_850.84	850.839	12.091	[M+NH4]+	MSI 2	lipidomics	TG O-51:1|TG O-19:1_16:0_16:0	XNSPGBKAHMJRGZ-UHFFFAOYSA-N												Organic compounds	Lipids and lipid-like molecules	Glycerolipids	Triradylcglycerols	TG	60648	62032	53954	21471	52204	50633	55056	71681	50630	28109	77834	82528	93753	31404	70621	84168	82407	62320	101197	107566		10821	7495	8956
729	6.00_139.11	139.112	6	[M+H-CH4O3]+	MSI 2	polyphenols	Sebacic acid	CXMXRPHRNRROMY-UHFFFAOYSA-N	202.248	C10H18O4	C(CCCCC(=O)O)CCCC(=O)O	5192	HMDB0000792	C08277	LMFA01170006	DB07645	26868			Organic compounds	Lipids and lipid-like molecules	Fatty Acyls	Fatty acids and conjugates	Medium-chain fatty acids	774550	1213427	1504028	652035	957664	1708988	1101549	1545530	823256	2262294	1102526	1329677	846205	1195806	1565880	1246956	1237205	1619510	1152560	1009570	4797072	7438365	10571356	9545307	7869348
730	0.76_278.14	278.14	0.763	[M+H]+	MSI 2	polyphenols	Thr-Gly-Thr	KBBRNEDOYWMIJP-KYNKHSRBSA-N	277.127	C10H19N3O6	C[C@H]([C@@H](C(=O)NCC(=O)N[C@@H]([C@@H](C)O)C(=O)O)N)O	145458070								Organic compounds	Organic acids and derivatives	Carboxylic acids and derivatives	Amino acids, peptides, and analogues	Peptides	61510	63555	41478	18572	63900	164710	25126	110347	65959	104532	65894	94198	33887	79666	53009	83916	34184	50430	56784	75751	336854	442524	267331	473811	413778
731	2.37_276.13	276.127	2.371	[M+H-2H2O]+	MSI 3	polyphenols	7-ethenyl-1,4a,7-trimethyl-3,4,6,8,8a,9,10,10a-octahydro-2H-phenanthrene-1-carboxylic acid	TVHDZSRRHQKNEZ-UHFFFAOYSA-N	302.452	C20H30O2	CC12CCCC(C1CCC3C2=CCC(C3)(C)C=C)(C)C(=O)O	14239484								Organic compounds	Lipids and lipid-like molecules	Prenol lipids	Diterpenoids	Diterpenoids	8619							12702			25067	41265	10079		27259	13688		21577	19283	17022	84539	113648	50458	95573	68728
732	6.77_577.52	577.521	6.774	[M-H]-	MSI 2	lipidomics	FAHFA 37:1;O|FAHFA 19:1/18:0;O	PAHZIPDHLOXNDJ-UHFFFAOYSA-N												Organic compounds	Lipids and lipid-like molecules	Fatty Acyls	Fatty acids and conjugates	Long-chain fatty acids	17212	48833	148960	38297	78954	70470	23359	147048	177512	45339	60579	63685	94756	117289	86496	73065	105889	31558	65224	98123	338999	484170	339079	354482	345713
733	125	111	474435	[M]*+	MSI 1	primary metabolism	Adipic acid	WNLRTRBMVRJNCN-UHFFFAOYSA-N	146.141	C6H10O4	C(CCC(=O)O)CC(=O)O	196	HMDB0000448	C06104	LMFA01170048		21605	CHEBI:30832		Organic compounds	Lipids and lipid-like molecules	Fatty Acyls	Fatty acids and conjugates	Medium-chain fatty acids	43557	40201	44821	43131	38614	43023	44451	45044	38250	35995	80691	83128	80772	82411	82819	81916	85065	88554	79048	82683	293310	260115	298525	316807	293810
734	5.57_328.25_5.57_333.20	328.2486_333.2049	5.572_5.574	[M+NH4]+_[M+Na]+	MSI 1	polyphenols	dihydroalbocycline	XIHUXEHAQPSMTF-SIMDOIPESA-N	310.429	C18H30O4	C[C@H]1CC/C=C(/[C@H](/C=C/[C@@](CCC(=O)O[C@@H]1C)(C)O)OC)\C	23724567		C15753				CHEBI:80081		Organic compounds	Phenylpropanoids and polyketides	Macrolides and analogues		Macrolides and analogues	470708	498426	520359	373076	472363	652613	298466	702009	472057	455768	1374719	1778569	1439850	1272137	1727207	1579301	1376530	1437920	1456890	1160696	108936	153884	50472	100822	78715
735	5.87_698.57	698.572	5.868	[M+H]+	MSI 2	lipidomics	NAGly 42:6;2O|NAGly 24:5;O(FA 18:0)	ZHDFOKYPPRUONZ-UHFFFAOYSA-N												Organic compounds	Lipids and lipid-like molecules	Fatty Acyls	Fatty acids and conjugates	NAGly	251570	287956	272480	212392	298716	295025	175197	265274	242934	213382	616486	565690	730733	214471	522381	589876	524359	571891	702042	716816	1782068	978588	1306517	1178254	1701413
736	5.92_579.51	579.511	5.917	[M-H]-	MSI 2	lipidomics	FA 40:6	MTFKNULUZHJPFJ-UHFFFAOYSA-N												Organic compounds	Lipids and lipid-like molecules	Fatty Acyls	Fatty acids and conjugates	Fatty acids	256671	375252	407375	258108	360719	366543	285236	387694	263024	350936	557793	439971	515032	473427	439541	442105	531553	401750	466720	441802	2046276	2028688	1598103	2311594	1941622
737	1.33_219.17	219.174	1.33	[M+H-2H2O]+	MSI 2	biogenic amines	15.alpha.-Hydroxyculmorin	OLWYTMKUCGVHCZ-VQYQIXSWSA-N	254.366	C15H26O3	C[C@@]1(CCCC2([C@@H]3C1[C@H](C2(C[C@H]3O)C)O)C)CO	23815357								Organic compounds	Lipids and lipid-like molecules	Prenol lipids	Monoterpenoids	Bicyclic monoterpenoids	380683	515526	392773	393513	324097	497719	544113	438504	389819	382202	956243	1139128	1094361	1058299	774715	1100839	834424	764045	958011	947004	74506	71926	81385	76011	88902
738	9.39_437.21	437.214	9.391	[M+H]+	MSI 2	biogenic amines	Phe-Asp-Arg	XMPUYNHKEPFERE-IHRRRGAJSA-N	436.463	C19H28N6O6	C1=CC=C(C=C1)C[C@@H](C(=O)N[C@@H](CC(=O)O)C(=O)N[C@@H](CCCN=C(N)N)C(=O)O)N	10320819								Organic compounds	Organic acids and derivatives	Carboxylic acids and derivatives	Amino acids, peptides, and analogues	Peptides	23555	5502		5909	7817	9794	8539	5960	4103	2201	42873	33352	30258	44741	54714	27655	66486	64637	47872	53063	171188	140506	147909	142085	151838
739	6.00_157.12	157.123	6	[M+H-H2O]+	MSI 2	polyphenols	9-Hydroxynonanoic acid	AFZMICRBFKZNIH-UHFFFAOYSA-N	174.238	C9H18O3	C(CCCCO)CCCC(=O)O	138052			LMFA01050028			CHEBI:79121		Organic compounds	Organic acids and derivatives	Hydroxy acids and derivatives	Medium-chain hydroxy acids and derivatives	Medium-chain hydroxy acids and derivatives	542140	943019	1045170	549667	809291	1266163	873465	1233331	613038	1847155	936107	1080994	603470	883084	1082215	961387	911103	1135178	892045	732170	3702385	5711260	8141082	6987051	5690398
740	6.00_181.16	181.159	6	[M+H-H2O]+	MSI 2	polyphenols	.gamma.-Dodecalactone	WGPCZPLRVAWXPW-UHFFFAOYSA-N	198.302	C12H22O2	CCCCCCCCC1CCC(=O)O1	16821	HMDB0031683		LMFA07040042					Organic compounds	Organoheterocyclic compounds	Lactones	Gamma butyrolactones	Gamma butyrolactones	1631517	2508693	2976030	1425201	2072464	3739286	2353635	3283073	1617577	4803054	2325241	2560428	1706109	2579067	3320596	2768704	2574599	3136746	2603650	2011718	10050670	15231191	22303020	20467088	16685474
741	7.58_271.18_7.58_182.10_7.53_271.18	271.1812_182.0969_271.1812	7.581_7.581_7.528	[M+H]+_[M+H-C4H11NO]+_[M+H]+	MSI 2	polyphenols	Doxylamine	HCFDWZZGGLSKEP-UHFFFAOYSA-N	270.37	C17H22N2O	CC(C1=CC=CC=C1)(C2=CC=CC=N2)OCCN(C)C	3162	HMDB0001936	D07878		DB00366	22970	CHEBI:51380		Organic compounds	Benzenoids	Benzene and substituted derivatives	Benzylethers	Benzylethers	1185159	1002858	1165909	650362	870989	1347851	895800	1407851	886069	967002	1104218	1526027	1183300	1270359	1563901	1569620	1234048	1555424	1386197	1356547	152100	229512	147247	177611	328242
742	7.88_624.59_7.88_629.55	624.5929_629.5476	7.882_7.879	[M+NH4]+_[M+Na]+	MSI 2	lipidomics	DG O-36:2|DG O-19:0_17:2	JJNBOEOFUQGZCS-UHFFFAOYSA-N												Organic compounds	Lipids and lipid-like molecules	Glycerolipids	Diradylglycerols	1-alkyl,2-acylglycerols	324341	446810	404790	337020	509677	449056	405806	438837	563926	421377	7438	16495	2683	10657	3710	4668	13114	14365	10520	5182	1924738	2557142	1907535	2264666	2201452
743	10.14_875.71_10.13_870.75	875.7101_870.7548	10.144_10.134	[M+Na]+_[M+NH4]+	MSI 1	lipidomics	TG 52:5|TG 16:0_18:2_18:3	MVAGPZSVOSGBMR-UHFFFAOYSA-N	853.349	C55H96O6	CCCCCCCCCCCCCCCC(=O)OCC(COC(=O)CCCCCCCC=CCC=CCC=CCC)OC(=O)CCCCCCCC=CCC=CCCCCC	74412181								Organic compounds	Lipids and lipid-like molecules	Glycerolipids	Triradylcglycerols	TG	85178239	80703702	171683834	65446190	208807095	144368483	226382764	113714565	118601505	81611175	9238363	8598641	77088320	47198358	12266579	11251960	27442216	8353131	14737866	22571397	33340984	27191944	65248968	17847513	21116429
744	12.28_1071.00	1071	12.282	[M+NH4]+	MSI 2	lipidomics	TG 66:3|TG 30:0_18:1_18:2	XSAUNJJWFCTYQP-UHFFFAOYSA-N												Organic compounds	Lipids and lipid-like molecules	Glycerolipids	Triradylcglycerols	TG	102256	38422	73902	47934	112808	142902	91789	66915	90599	34842			3641				9983		9303		11591		8720
745	5.85_313.21	313.212	5.851	[M+H-3H2O]+	MSI 2	biogenic amines	3.beta.-Allotetrahydrocortisol	AODPIQQILQLWGS-VSJLKEFSSA-N	366.492	C21H34O5	C[C@]12CC[C@@H](C[C@@H]1CC[C@@H]3[C@@H]2[C@H](C[C@]4([C@H]3CC[C@@]4(C(=O)CO)O)C)O)O	12444612	HMDB0000314							Organic compounds	Lipids and lipid-like molecules	Sterol lipids	Hydroxysteroids	21-hydroxysteroids	241041	243405	192321	203636	155246	213763	324060	184585	245820	226828	563238	566912	617681	566168	532691	544220	550080	511318	479237	474241	35207	13252	46638	31459	72259
746	2.52_309.18	309.182	2.525	[M+H]+	MSI 2	polyphenols	Gestrinone	BJJXHLWLUDYTGC-ANULTFPQSA-N	308.415	C21H24O2	CC[C@]12C=CC3=C4CCC(=O)C=C4CC[C@H]3[C@@H]1CC[C@]2(C#C)O	27812	HMDB0002720	D04317			23094			Organic compounds	Lipids and lipid-like molecules	Sterol lipids	Estrane steroids	Estrogens and derivatives	2398394	2125493	2753113	1389594	2344669	3534313	1029481	3329869	1736565	2372417	5014040	5888944	3523465	4187438	5080369	4173436	4512912	4875013	4438677	3325902	323753	440690	367229	588533	503174
747	5.38_722.57	722.573	5.384	[M+NH4]+	MSI 2	lipidomics	SE 24:1;O4/22:5	IWTHWFAQSBTZPQ-UHFFFAOYSA-N												Organic compounds	Lipids and lipid-like molecules	Sterol lipids	Steroid esters	SE	162715	271411	185834	141555	183199	213106	175090	185117	218672	203820	312074	283117	403540	254351	337760	383756	302425	315036	277486	388691	1521856	1002889	1134144	1293805	1361085
748	5.88_391.19	391.187	5.875	[M+Na]+	MSI 2	biogenic amines	1-Benzyl 2-(1-ethylhexyl) phthalate	AMJMHZXMMFYORT-UHFFFAOYSA-N	368.467	C23H28O4	CCCCCC(CC)OC(=O)C1=CC=CC=C1C(=O)OCC2=CC=CC=C2	22670785								Organic compounds	Benzenoids	Benzene and substituted derivatives	Benzoic acids and derivatives	Benzoic acid esters	4351573	4748996	3775390	3723109	3016756	4122733	6203459	3826082	4241322	4044324	9487638	9610971	11023015	9292039	9556388	8876955	10984781	8819477	7399411	9116636	845372	653411	962980	816246	1077356
749	6.77_572.53_6.77_577.48	572.5252_577.4807	6.774_6.770	[M+NH4]+_[M+Na]+	MSI 2	lipidomics	DG 31:0|DG 15:0_16:0	PENDWALPEZESAS-UHFFFAOYSA-N	554.491	C34H66O5	CCCCCCCCCCCCCCCC(=O)OC(CO)COC(=O)CCCCCCCCCCCCCC	14275228								Organic compounds	Lipids and lipid-like molecules	Glycerolipids	Diradylglycerols	DG	943463	1265507	908096	1058639	1001998	1100984	1225509	958457	1154450	989966	610341	601869	603961	941794	580420	664216	547390	646953	605486	655220	188549	161574	224578	119690	230310
750	3.20_391.19	391.188	3.202	[M+Na]+	MSI 2	polyphenols	1-Benzyl 2-(1-ethylhexyl) phthalate	AMJMHZXMMFYORT-UHFFFAOYSA-N	368.467	C23H28O4	CCCCCC(CC)OC(=O)C1=CC=CC=C1C(=O)OCC2=CC=CC=C2	22670785								Organic compounds	Benzenoids	Benzene and substituted derivatives	Benzoic acids and derivatives	Benzoic acid esters	1278310	1093903	1404115	651586	1160198	1852821	460036	1616139	845784	1027109	2465155	2991464	1787163	2010690	2548388	2176918	2402444	2515885	2329113	1829754	207092	284803	164802	290209	260183
751	1.00_309.24	309.243	1.003	[M+H-H2O]+	MSI 2	biogenic amines	1,2-Dihydroxyheptadec-16-yn-4-yl acetate	FHGZOCAZNHYWAL-UHFFFAOYSA-N	326.472	C19H34O4	CC(=O)OC(CCCCCCCCCCCC#C)CC(CO)O	45782986	HMDB0031049							Organic compounds	Lipids and lipid-like molecules	Fatty Acyls	Fatty alcohols	Long-chain fatty alcohols	57011	26397	15052	8565	93006	4421	4803	18532	1030	5741	23582	9713	13444	37979	23940	27063	353920	15391	26257	5338	237092	109569	24699	103434	623989
752	3.48_249.11	249.11	3.481	[M+Na]+	MSI 1	polyphenols	(2S,3S)-3-hydroxy-4-methoxy-2-(2-phenylethyl)-2,3-dihydropyran-6-one	VJCNEDVMYQCMBK-FZMZJTMJSA-N	248.275	C14H16O4	COC1=CC(=O)O[C@H]([C@@H]1O)CCC2=CC=CC=C2	11322609								Organic compounds	Phenylpropanoids and polyketides	Kavalactones		Kavalactones	37668	25157	27946	11021	15961	44849	5448	25956	23965	18528	49716	53080	53288	52922	53001	43199	52139	60344	37756	43554	188956	273225	159327	267369	223587
753	8.05_908.73	908.734	8.052	[M+NH4]+	MSI 2	lipidomics	TG 54:8;1O|TG 18:2_18:3_18:3;1O	IXIWBHWTKQYZDO-UHFFFAOYSA-N												Organic compounds	Lipids and lipid-like molecules	Glycerolipids	Triradylcglycerols	TG	1002512	1069844	1663821	709759	2584924	987364	2335658	1516043	1316261	991081	138759	145718	1607719	518873	133236	369377	548742	108033	213734	423501	464328	155887	1922507	97510	264234
754	6.11_277.25	277.253	6.114	[M+H-CH2O2]+	MSI 2	polyphenols	(1R,4aS,5R,8aS)-5-(5-Hydroxy-3-methylpentyl)-1,4a-dimethyl-6-methylidene-3,4,5,7,8,8a-hexahydro-2H-naphthalene-1-carboxylic acid	NSRKLZRKJJQJLD-KXBJDGJWSA-N	322.483	C20H34O3	CC(CC[C@@H]1C(=C)CC[C@H]2[C@]1(CCC[C@@]2(C)C(=O)O)C)CCO	23955908								Organic compounds	Lipids and lipid-like molecules	Prenol lipids	Diterpenoids	Diterpenoids	2342242	4163214	5443068	2840497	3178417	5351473	2943332	5492485	1915312	3113337	1160024	1081547	973894	1493547	1312736	1362011	1256744	1339395	1489752	1035722	19702273	21997482	26052604	30281504	30972477
755	6.81_564.54	564.535	6.811	[M+H-H2O]+	MSI 2	lipidomics	Cer 36:1;O3|Cer 21:0;O2/15:1;O	IRLYNLZVDITIPH-UHFFFAOYSA-N												Organic compounds	Lipids and lipid-like molecules	Sphingolipids	Ceramides	Long-chain ceramides	179208	231556	202102	185904	296934	229073	237850	168842	197188	182665	139431	150879	207937	101938	120531	124926	194109	131458	163226	201702	2061054	2171490	2406168	2236839	2254621
756	1.61_227.20	227.201	1.607	[M-H]-	MSI 1	lipidomics	FA 14:0 (myristic acid)	TUNFSRHWOTWDNC-UHFFFAOYSA-N	228.371	C14H28O2	CCCCCCCCCCCCCC(=O)O	11005	HMDB0000806	C06424	LMFA01010014	DB08231	21666	CHEBI:28875		Organic compounds	Lipids and lipid-like molecules	Fatty Acyls	Fatty acids and conjugates	Long-chain fatty acids	54216874	70125977	58937913	66579058	67891259	63954040	62307302	72644685	51240606	47224694	150468719	144866972	159989893	165783763	167913069	145014781	157842591	141909006	142572121	158219678	500531409	483731272	442706155	447092828	509172078
757	4.93_299.26	299.259	4.927	[M-H]-	MSI 2	lipidomics	FA 18:0;O	RKHXDCVAPIMDMG-UHFFFAOYSA-N	300.477	C18H36O3	CCCCCCCCCC(CCCCCCCC(=O)O)O	9570127	HMDB0061661		LMFA02000127					Organic compounds	Lipids and lipid-like molecules	Fatty Acyls	Fatty acids and conjugates	Long-chain fatty acids	823623	783157	909353	731308	795630	925511	818872	1371837	660131	677099	375313	324304	425547	418801	563067	672840	538084	624536	527873	763673	4733323	4066396	4969109	5128564	4395744
758	2.17_237.16	237.16	2.169	[M+H-2H2O]+	MSI 2	polyphenols	tert-Butyl 4-(aminomethyl)-1-piperidinecarboxylate	KLKBCNDBOVRQIJ-UHFFFAOYSA-N	214.305	C11H22N2O2	CC(C)(C)OC(=O)N1CCC(CC1)CN	736817								Organic compounds	Organoheterocyclic compounds	Piperidines	Piperidinecarboxylic acids and derivatives	Piperidinecarboxylic acids	1112543	1141808	1347931	878969	1137741	1659776	640631	1625034	913079	1067050	2488032	1391676	1782283	2076692	2311788	1993021	2158862	2262011	2127670	1749286	206135	256850	169836	239500	217913
759	6.11_259.24	259.243	6.111	[M+H-CH2O2]+	MSI 2	polyphenols	Anticopalic acid	JFQBNOIJWROZGE-VQGREHCUSA-N	304.468	C20H32O2	C/C(=C\C(=O)O)/CC[C@H]1C(=C)CC[C@@H]2[C@@]1(CCCC2(C)C)C	11808890								Organic compounds	Lipids and lipid-like molecules	Prenol lipids	Diterpenoids	Diterpenoids	603663	1048487	1405535	796813	846280	1429796	701281	1427970	482630	791075	254686	282288	267945	477470	372439	419649	358039	477558	442188	298084	4823219	5206875	6237005	7254629	7499179
760	4.87_696.56	696.556	4.872	[M+H]+	MSI 2	lipidomics	NAGly 42:7;2O|NAGly 24:5;O(FA 18:1)	KXFSDMGGNXLJJN-UHFFFAOYSA-N												Organic compounds	Lipids and lipid-like molecules	Fatty Acyls	Fatty acids and conjugates	NAGly	161196	173569	144005	102283	199729	170863	185892	167672	195828	142229	378001	367584	427069	340585	388601	394381	442844	311613	423923	482154	1173137	993107	1187658	1140671	1402654
761	1.10_593.28	593.276	1.104	[M+H]+	MSI 2	biogenic amines	Pheophorbide a	RKEBXTALJSALNU-LDCXZXNSSA-N	592.696	C35H36N4O5	CCC1=C(C2=NC1=CC3=C(C4=C([C@@H](C(=C5[C@H]([C@@H](C(=CC6=NC(=C2)C(=C6C)C=C)N5)C)CCC(=O)O)C4=N3)C(=O)OC)O)C)C	253193								Organic compounds	Organoheterocyclic compounds	Tetrapyrroles and derivatives		Tetrapyrroles and derivatives	1254870	940992	736784	743352	1474832	842454	975582	798959	748427	691560	1201414	1088597	970333	1421872	1170014	1078645	1053658	1327173	1149362	500772	220485	282731	179124	162846	266916
762	0.64_265.18	265.181	0.637	[M-H]-	MSI 2	lipidomics	FA 16:3;O	SUQSGDDQZSXVOO-UHFFFAOYSA-N												Organic compounds	Lipids and lipid-like molecules	Fatty Acyls	Fatty acids and conjugates	Fatty acids	6880	137584	105257	139372	175431	171586	118021	199506	126384	133365	99007		173284	282505	173170	179166	217098	214298	251457	260424	27795	45056	18624	28522	30150
763	6.00_241.22	241.217	6	[M+H]+	MSI 2	polyphenols	Methyl myristoleate	RWIPSJUSVXDVPB-SREVYHEPSA-N	240.382	C15H28O2	CCCC/C=C\CCCCCCCC(=O)OC	5352674			LMFA07010493					Organic compounds	Lipids and lipid-like molecules	Fatty Acyls	Fatty acid esters	Fatty acid methyl esters	756873	1329277	1533154	716103	1026114	1923458	1289425	1597738	859603	2413618	1251753	1426273	838092	1326377	1522574	1327365	1247548	1615128	1272042	1089983	5004950	7542633	10440375	9807795	8069769
764	9.30_89.11	89.1074	9.303	[M+H]+	MSI 1	biogenic amines	Putrescine	KIDHWZJUCRJVML-UHFFFAOYSA-N	88.1516	C4H12N2	C(CCN)CN	1045	HMDB0001414	C00134		DB01917	49405	CHEBI:17148		Organic compounds	Organic nitrogen compounds	Organonitrogen compounds	Amines	Primary amines	702097	699414	583421	601425	605694	543954	422041	440007	553184	426216	6406366	5987899	6473041	5305624	5706415	6008217	6165970	6014067	6663509	6990570	491943	466221	379844	420869	317424
765	4.41_796.65	796.647	4.414	[M+NH4]+	MSI 2	lipidomics	SE 24:1;O4/26:4;O	RRSHNVAYXYEBNX-UHFFFAOYSA-N												Organic compounds	Lipids and lipid-like molecules	Sterol lipids	Steroid esters	SE		16743	4051	4426	5039	6765	19654	4377	21019	13519	12121	9899	63827		26781	4988	41738	50132	67081	109681	61344		39699	81609	111559
766	3.70_376.18	376.177	3.696	[M+H]+	MSI 3	polyphenols	(1R,2S,3S,5S,11R,12R)-5-(furan-3-yl)-12-hydroxy-3,11-dimethyl-6,14-dioxatetracyclo[10.2.2.0²,¹¹.0³,⁸]hexadec-15-ene-7,13-dione	AALLCALQGXXWNA-LZDJLBIOSA-N	358.386	C20H22O6	C[C@@]12CCC3C(=O)O[C@@H](C[C@]3([C@@H]1[C@H]4C=C[C@@]2(C(=O)O4)O)C)C5=COC=C5	23872140								Organic compounds	Organoheterocyclic compounds	Naphthopyrans		Naphthopyrans	8453	15402	36062		24683	28793		18198	19851	18777	57327	72522	19794	35204	67886	29933	52043	62943	41815	35996	4967
767	6.00_171.14	171.138	6	[M+H-C5H10O]+	MSI 2	polyphenols	1,7-Dioxacycloheptadecan-8-one	MKEIDVFLAWJKMY-UHFFFAOYSA-N	256.382	C15H28O3	C1CCCCC(=O)OCCCCCOCCCC1	18826								Organic compounds	Phenylpropanoids and polyketides	Macrolides and analogues		Macrolides and analogues	758623	1385187	1586837	824091	1069344	1998194	1184698	1809373	892529	2738102	1224580	1544825	884004	1397530	1690537	1431169	1366270	1617359	1347728	1149133	5832581	7999175	11208516	10588316	8707734
768	8.09_246.10	246.099	8.085	[M+H]+	MSI 2	biogenic amines	{[3-Ethoxy-2-(ethoxycarbonyl)-3-oxo-1-propenyl]amino}acetic acid	VHDKFEVVWUENKR-UHFFFAOYSA-N	245.23	C10H15NO6	CCOC(=O)C(=CNCC(=O)O)C(=O)OCC	1570605								Organic compounds	Organic acids and derivatives	Carboxylic acids and derivatives	Amino acids, peptides, and analogues	Amino acids and derivatives	184058	215513	117514	66011	25401	91307	70347	59981	46941	33009	46822	34529	70522	190867	117646	111093	60912	77941	262622	404282	286050	173182	243570	239630	292721
769	7.79_582.55	582.546	7.79	[M+H]+	MSI 2	lipidomics	Cer 36:1;O3|Cer 21:1;O2/15:0;O	APRZZTJZQMPPRD-UHFFFAOYSA-N												Organic compounds	Lipids and lipid-like molecules	Sphingolipids	Ceramides	Long-chain ceramides	271069	433749	385664	788222	449540	814462	314300	258218	686241	563734	314139	288882	432879	342476	380415	375205	417749	325071	380929	433205	2633355	2423968	1970279	2356375	2811261
770	6.31_404.32	404.316	6.306	[M+H]+	MSI 2	polyphenols	N-(14-Methylpentadecanoyl)phenylalanine	WICAPTTWPBEVPW-UHFFFAOYSA-N	403.309	C25H41NO3	CC(C)CCCCCCCCCCCCC(=O)NC(CC1=CC=CC=C1)C(=O)O	102571592								Organic compounds	Organic acids and derivatives	Carboxylic acids and derivatives	Amino acids, peptides, and analogues	Amino acids and derivatives			114218			118424					253554	408821	153166	354922	324023	317711	246449	381959	159556	236302	745269	1113230	418819	1256177	143895
771	7.13_283.17	283.166	7.13	[M+H-C6H10]+	MSI 2	biogenic amines	2-(Dicyclohexylphosphino)-2'-methylbiphenyl	GPVWUKXZFDHGMZ-UHFFFAOYSA-N	364.504	C25H33P	CC1=CC=CC=C1C2=CC=CC=C2P(C3CCCCC3)C4CCCCC4	2734938								Organic compounds	Benzenoids	Benzene and substituted derivatives	Biphenyls and derivatives	Biphenyls and derivatives	8509383	10081429	8012516	7559888	6960595	8331774	11803877	8092926	8599889	8473226	19858267	20938217	19288042	22100649	17135760	18869041	17724304	19933101	13292581	20037806	1999577	1526414	1889110	1781178	2045125
772	6.00_227.20	227.201	6	[M+H]+	MSI 2	polyphenols	Myristoleic acid	YWWVWXASSLXJHU-WAYWQWQTSA-N	226.356	C14H26O2	CCCC/C=C\CCCCCCCC(=O)O	5281119	HMDB0002000	C08322	LMFA01030051			CHEBI:27781		Organic compounds	Lipids and lipid-like molecules	Fatty Acyls	Fatty acids and conjugates	Long-chain fatty acids	1618772	2562806	2783708	1455657	2002714	3682457	2280390	3306412	1716101	4897297	2137342	2881774	1504575	2587829	3120833	2617352	2543475	2956035	2449614	2008374	10099218	14296640	21408918	19069128	15823640
773	3.27_220.12	220.118	3.27	[M+NH4]+	MSI 3	biogenic amines	Pantothenic acid	GHOKWGTUZJEAQD-ZETCQYMHSA-N	219.235	C9H17NO5	CC(C)(CO)[C@H](C(=O)NCCC(=O)O)O	6613		C00864			23417			Organic compounds	Organic oxygen compounds	Organooxygen compounds	Alcohols and polyols	Secondary alcohols	162507	145840	109975	119877	115441	134580	191141	144458	142957	142188	300564	303787	343073	321034	262885	282885	290715	309595	270229	319727	31319	13098	28494	25394	17467
774	0.96_384.25	384.253	0.962	[M+H]+	MSI 2	biogenic amines	Guineensine	FPMPOFBEYSSYDQ-AUVZEZIHSA-N	383.525	C24H33NO3	CC(C)CNC(=O)/C=C/C=C/CCCCCC/C=C/C1=CC2=C(C=C1)OCO2	6442405								Organic compounds	Organoheterocyclic compounds	Benzodioxoles		Benzodioxoles	40436	36546	59051	336952	77194	89338	12171	30839	57767	31035	121152	135331	86486	147706	120297	110294	78269	193106	81024	8926				4382	14832
775	9.24_229.01	229.012	9.238	[M-H]-	MSI 1	biogenic amines	Ribose 5-phosphate	PPQRONHOSHZGFQ-LMVFSUKVSA-N	230.11	C5H11O8P	C([C@H]([C@H]([C@H](C=O)O)O)O)OP(=O)(O)O	77982						CHEBI:17797		Organic compounds	Organic oxygen compounds	Organooxygen compounds	Carbohydrates and carbohydrate conjugates	Monosaccharides	156181	229602	138993	145385	68354	167139	309199	194795	209787	168834		2508		6261		3981	3892		1960		28617	10232	22614	24768	52383
776	5.17_223.14	223.144	5.171	[M+Na]+	MSI 2	biogenic amines	4-Amino-N-Boc-piperidine	LZRDHSFPLUWYAX-UHFFFAOYSA-N	200.278	C10H20N2O2	CC(C)(C)OC(=O)N1CCC(CC1)N	1268291								Organic compounds	Organoheterocyclic compounds	Piperidines	Piperidinecarboxylic acids and derivatives	Piperidinecarboxylic acids	8928558	10178488	6982735	7780571	7305022	9099303	12450769	8592526	8035221	8781038	18820441	19909251	18530332	17804301	19529674	18398872	18403125	18812495	16891484	18426846	1971808	1680519	2208938	1951866	2408421
777	5.23_359.22	359.22	5.229	[M+Na]+	MSI 2	polyphenols	8S,15S-DiHETE	NNPWRKSGORGTIM-HCCKYKKOSA-N	336.466	C20H32O4	CCCCC[C@@H](/C=C/C=C\C=C\[C@H](C/C=C\CCCC(=O)O)O)O	5283183			LMFA03060050					Organic compounds	Lipids and lipid-like molecules	Fatty Acyls	Eicosanoids	Hydroxyeicosatetraenoic acids	977724	1132176	1232885	952476	1078219	1507708	758814	1335468	880940	947101	1504441	1833298	1434101	1533591	1675933	1508476	1511038	1507833	1354153	1230272	164541	204569	146120	185542	214561
778	1.54_79.02	79.0213	1.541	[M+H]+	MSI 1	biogenic amines	Dimethyl sulfoxide	IAZDPXIOMUYVGZ-UHFFFAOYSA-N	78.1346	C2H6OS	CS(=O)C	679	HMDB0002151	C11143		DB01093	21735	CHEBI:28262	DMSO	Organic compounds	Organosulfur compounds	Sulfoxides		Sulfoxides	2128534	2933934	1741596	1648785	2141267	2509055	2403134	1217037	3719327	1243186	738737	1025635	1344593	869256	1368050	1474083	1559940	1445847	1569186	4488635	10414792	8910344	10815307	8055283	10275877
779	7.59_671.56	671.558	7.592	[M+Na]+	MSI 2	lipidomics	TG O-38:2|TG O-20:2_9:0_9:0	VANPFWJMOLHVHJ-UHFFFAOYSA-N												Organic compounds	Lipids and lipid-like molecules	Glycerolipids	Triradylcglycerols	TG	60678	76793	64092	55502	87525	84895	52798	79357	124964	61265	2612	9444	20362	11847	22239	9078	28024	17288	20888	30473	450701	576725	388226	506508	421542
780	9.81_163.11	163.108	9.811	[M+Na]+	MSI 3	biogenic amines	5-Hydroxylysine	YSMODUONRAFBET-UHNVWZDZSA-N	162.187	C6H14N2O3	C(C[C@@H](C(=O)O)N)[C@H](CN)O	3032849	HMDB0000450	C16741				CHEBI:18040		Organic compounds	Organic acids and derivatives	Carboxylic acids and derivatives	Amino acids, peptides, and analogues	Amino acids and derivatives	74866	90822	66199	78740	61010	74252	66860	76497	95420	75747	113519	57696	148685	98905	75871	96698	80243	90425	83838	102556	469086	381485	445672	400671	497490
781	6.79_702.57	702.57	6.794	[M+NH4]+	MSI 2	lipidomics	SE 24:1;O4/19:2;O	CAHHKDBUOSMGPU-UHFFFAOYSA-N												Organic compounds	Lipids and lipid-like molecules	Sterol lipids	Steroid esters	SE	120675	224936	175598	76651	196093	123326	90888	120436	114029	96686	9410	4296	63104		5561	4566	30905	9110	15526	18277	18740	61021	120131	11373	6918
782	7.55_704.62	704.619	7.552	[M+NH4]+	MSI 2	lipidomics	SE 24:1;O4/20:0	CYINYKDHDGYRDJ-UHFFFAOYSA-N												Organic compounds	Lipids and lipid-like molecules	Sterol lipids	Steroid esters	SE	598647	772220	654953	610186	819804	788571	677514	783274	877715	719076	1072871	942384	971711	1068240	1125605	932055	1075105	1005609	1038002	1135609	104003	122220	157772	103179	109418
783	9.92_404.21	404.214	9.921	[M+H]+	MSI 2	biogenic amines	Gln-Glu-Lys	MAGNEQBFSBREJL-DCAQKATOSA-N	403.207	C16H29N5O7	C(CCN)C[C@@H](C(=O)O)NC(=O)[C@H](CCC(=O)O)NC(=O)[C@H](CCC(=O)N)N	145455057								Organic compounds	Organic acids and derivatives	Carboxylic acids and derivatives	Amino acids, peptides, and analogues	Peptides	88454	96223	67949	65068	78569	58681	92781	77252	77813	71016	149822	132314	179458	203287	167617	179999	189844	172158	169640	191699	693342	559790	681131	678218	838425
784	1.48_162.05	162.055	1.48	[M+Na]+	MSI 3	biogenic amines	2,8-Quinolinediol	ZXZKYYHTWHJHFT-UHFFFAOYSA-N	161.158	C9H7NO2	C1=CC2=C(C(=C1)O)NC(=O)C=C2	97250		C06342				CHEBI:17715	CPD-15134	Organic compounds	Organoheterocyclic compounds	Quinolines and derivatives	Quinolones and derivatives	Quinolones and derivatives	5010				4428		8708							13972		9535			6638		29073	31893	21572	27526	46322
785	2.10_141.05_2.03_141.05	141.0547_141.0547	2.097_2.034	[M-H-H2O]-_[M-H-H2O]-	MSI 2	biogenic amines	2,2-Dimethylglutaric acid	BTUDGPVTCYNYLK-UHFFFAOYSA-N	160.168	C7H12O4	CC(C)(CCC(=O)O)C(=O)O	12681	HMDB0061676				21585	CHEBI:68459		Organic compounds	Lipids and lipid-like molecules	Fatty Acyls	Fatty acids and conjugates	Branched fatty acids	1530702	1564225	1377735	1156038	1006370	1647219	2269974	1296930	1589469	1446714	4184235	4582042	4419652	4629889	4369472	4396584	4369428	4341297	3995741	4561057	374763	247081	386338	345171	417611
786	3.49_678.51	678.509	3.492	[M-H]-	MSI 2	lipidomics	SL 40:4;O	OCPGVQMBSDOQTC-UHFFFAOYSA-N												Organic compounds	Lipids and lipid-like molecules	Sphingolipids	Sphingoid bases	SL	1647737	1427092	1568768	1306706	2039505	2222664	1056365	1923534	1496202	1581460	5733256	5568834	4751994	6071076	5832130	4405814	4791733	5579513	4268814	5861105	526504	406989	489243	326512	522273
787	5.75_305.21	305.212	5.749	[M+H-H2O]+	MSI 2	polyphenols	8-Gingerol	BCIWKKMTBRYQJU-INIZCTEOSA-N	322.44	C19H30O4	CCCCCCC[C@@H](CC(=O)CCC1=CC(=C(C=C1)O)OC)O	168114		C17495				CHEBI:81133		Organic compounds	Benzenoids	Phenols	Methoxyphenols	Gingerols	708647	1515669	885161	403526	1118056	2293792	2578344	3314038	1889019	1320282	890888	1059250	796602	1173941	987195	1101042	967679	1255432	909621	765966	30045	47438	149088	247738	161256
788	3.90_178.05	178.05	3.898	[M-H]-	MSI 2	biogenic amines	1-(3-Pyridyl)-1-butanone-4-carboxylic acid	VWCYZEGYPFRNBD-UHFFFAOYSA-N	215.035	C9H10ClNO3	C1=CC(=CN=C1)C(=O)CCC(=O)O.Cl	53439941								Organic compounds	Organic acids and derivatives	Keto acids and derivatives	Gamma-keto acids and derivatives	Gamma-keto acids and derivatives	115729	98728	86858	91904	77374	109375	146432	91478	103546	111509	255840	263207	282702	273475	291241	292352	280786	282806	263272	288223	16258	18234	26825	21954	23044
789	7.80_596.56	596.561	7.802	[M+H]+	MSI 2	lipidomics	Cer 37:1;O3|Cer 18:0;O2/19:1;O	LUENCKJFKWZCNG-UHFFFAOYSA-N												Organic compounds	Lipids and lipid-like molecules	Sphingolipids	Ceramides	Long-chain ceramides	177087	276479	279391	327584	315671	376015	316737	200650	409147	430424	161760	173520	206084	141560	208929	208446	276311	188002	198960	257303	1585280	2360761	1343597	2171972	1828721
790	6.00_195.17_6.00_177.16	195.1748_177.1641	6_6	[M+H-CH4O3]+_[M+H-CH6O4]+	MSI 2	polyphenols	Tetradecanedioic acid	HQHCYKULIHKCEB-UHFFFAOYSA-N	258.354	C14H26O4	C(CCCCCCC(=O)O)CCCCCC(=O)O	13185	HMDB0000872		LMFA01170018			CHEBI:76308		Organic compounds	Lipids and lipid-like molecules	Fatty Acyls	Fatty acids and conjugates	Long-chain fatty acids	3182896	5184608	5658443	2841580	4237341	7447908	4790896	6487391	3316843	9200564	4638821	5322472	3217881	5014157	6457447	5634453	5192970	6267615	5106445	3978038	19692615	28656967	40798905	36521947	30966886
791	8.09_155.03_8.09_191.02	155.0341_191.0191	8.086_8.089	[M-H]-	MSI 2	biogenic amines	D-Saccharic acid 1,4-lactone	XECPAIJNBXCOBO-MMPJQOAZSA-N	192.124	C6H8O7	[C@H]1([C@H](C(=O)O[C@@H]1[C@@H](C(=O)O)O)O)O	122306	HMDB0041862					CHEBI:85805		Organic compounds	Organoheterocyclic compounds	Lactones	Gamma butyrolactones	Gamma butyrolactones	747704	633384	596033	570980	599879	745299	769766	477792	690687	703802	6650122	7212095	7435895	8555443	7487534	7185254	7402604	6369365	7703130	7391218	160562	156127	173662	116171	155683
792	6.27_121.10	121.102	6.269	[M+H-C2H8O4]+	MSI 2	polyphenols	Sebacic acid monomethyl ester	OSYQOBUUFRGFNG-UHFFFAOYSA-N	216.275	C11H20O4	COC(=O)CCCCCCCCC(=O)O	69957								Organic compounds	Lipids and lipid-like molecules	Fatty Acyls	Fatty acids and conjugates	Medium-chain fatty acids	132572	234715	310499	141862	206737	243343	118619	303871	118203	207749	25584	44359	12625	55609	78377	72190	74262	67699	92436	49925	791127	1042758	1092028	1158585	1106340
793	11.84_1008.90	1008.9	11.844	[M+NH4]+	MSI 2	lipidomics	TG 62:6|TG 26:0_18:3_18:3	QRPKRRRXRFNEHS-UHFFFAOYSA-N												Organic compounds	Lipids and lipid-like molecules	Glycerolipids	Triradylcglycerols	TG	126121	132448	206197	82365	251124	144050	316463	150121	130663	110676			90451		4692	7720	17396		7478	16335	29400		81404		10436
794	2.41_352.32	352.319	2.41	[M+H]+	MSI 2	lipidomics	Eicosadienoyl-EA	MWQCBVWCBTUPDQ-UHFFFAOYSA-N	351.567	C22H41NO2	CCCCCC=CCC=CCCCCCCCCCC(=O)NCCO	49824003								Organic compounds	Organic nitrogen compounds	Organonitrogen compounds	Amines	Alkanolamines	315146	300719	463912	482051	286022	353131	349320	290900	405565	322916	889707	870628	750734	1403033	769312	838357	967791	738356	802237	820603	20875	53146	10268		24605
795	1.71_186.09	186.092	1.707	[M+Na]+	MSI 1	polyphenols	N-Acetyl-2-phenylethylamine	MODKMHXGCGKTLE-UHFFFAOYSA-N	163.217	C10H13NO	CC(=O)NCCC1=CC=CC=C1	70143		C06746				CHEBI:18177	N-ACETYLPHENYLETHYLAMINE	Organic compounds	Organic acids and derivatives	Carboxylic acids and derivatives	Carboxylic acid derivatives	Carboxylic acid amides	493841	482830	613759	350681	556157	877187	223653	787983	389734	515760	1051528	1277996	738528	825044	1105373	937781	1055657	1068402	1013287	753912	102001	130403	94480	142989	129358
796	1.19_551.27	551.266	1.192	[M+Na]+	MSI 2	biogenic amines	17-(Furan-3-yl)-3-hydroxy-4,4,8-trimethyl-16-oxo-14,15-epoxyandrostane-1,7-diyl diacetate	LZMUZSFHEIXIJR-UHFFFAOYSA-N	528.635	C30H40O8	CC(=O)OC1CC2C(C(CC(C2(C3C1(C45C(O4)C(=O)C(C5(CC3)C)C6=COC=C6)C)C)OC(=O)C)O)(C)C	45359823								Organic compounds	Lipids and lipid-like molecules	Prenol lipids	Triterpenoids	Limonoids	1229280	1030551	1019774	879821	1066212	1099283	980816	970572	1086469	938859	1469875	1626016	1959824	1776292	1519853	1440149	1855319	1503298	1188221	1566650	185352	148825	177373	203678	196846
797	7.06_271.17	271.165	7.061	[M+H]+	MSI 2	biogenic amines	Estra-1,3,5(10),7-tetraene-3,17.beta.-diol	NLLMJANWPUQQTA-UBDQQSCGSA-N	270.367	C18H22O2	C[C@]12CC[C@H]3C(=CCC4=C3C=CC(=C4)O)[C@@H]1CC[C@@H]2O	11954027		C14485				CHEBI:62851		Organic compounds	Lipids and lipid-like molecules	Sterol lipids	Hydroxysteroids	17-hydroxysteroids	6013759	5989165	5052766	4761457	4683132	5289528	7695755	5252031	5288777	5370134	9763845	9001907	9384403	9753948	8187372	9471818	9877594	9064187	8205368	10034886	1085017	986830	1232403	1003339	1339050
798	5.28_361.24	361.236	5.282	[2M+K]+	MSI 3	polyphenols	2-(2-hydroxybut-3-en-2-yl)-3a,6,6,9a-tetramethyl-2,4,5,5a,7,8,9,9b-octahydro-1H-benzo[e][1]benzofuran-4,5-diol	UNORIIWPFZFSEC-UHFFFAOYSA-N	338.482	C20H34O4	CC1(CCCC2(C1C(C(C3(C2CC(O3)C(C)(C=C)O)C)O)O)C)C	57509442								Organic compounds	Organoheterocyclic compounds	Naphthofurans		Naphthofurans	174161	173095	216838	149698	172720	247449	126813	223405	143261	167161	182273	277223	258649	238190	260254	244750	235310	230606	233919	194725	29310	44113	9898	70054	36138
799	6.77_222.12	222.124	6.766	[M+H]+	MSI 2	biogenic amines	1-(4-Nitrobenzyl)piperazine	VDHHZWTYFFZYBM-UHFFFAOYSA-N	221.256	C11H15N3O2	C1CN(CCN1)CC2=CC=C(C=C2)[N+](=O)[O-]	93982								Organic compounds	Benzenoids	Benzene and substituted derivatives	Nitrobenzenes	Nitrobenzenes	74937	71116	41256	52407	50237	66204	70610	67942	43209	59610	140850	103799	132578	142538	126967	140323	128495	106242	147304	104697	13871	7036	14289	7503	8290
800	6.30_341.31	341.306	6.297	[M+K]+	MSI 2	polyphenols	2,3-Dihydroxypropyl octadecanoate	VBICKXHEKHSIBG-UHFFFAOYSA-N	358.557	C21H42O4	CCCCCCCCCCCCCCCCCC(=O)OCC(CO)O	24699		D01947	LMGL01010003		29161	CHEBI:75555		Organic compounds	Lipids and lipid-like molecules	Glycerolipids	Monoradylglycerols	Monoacylglycerols	6262618	10952786	12476389	6527934	8623235	15520533	6422222	14411472	3883490	9147875	4875098	5469405	3104989	7433627	6364623	5358979	5248450	7050808	6044852	5324081	37237970	53026073	45295057	57884155	43525576
801	5.34_852.51	852.513	5.338	[M+H]+	MSI 2	polyphenols	.alpha.-Chaconine	TYNQWWGVEGFKRU-AJDPQWBVSA-N	852.061	C45H73NO14	C[C@H]1CC[C@@H]2[C@H]([C@H]3[C@@H](N2C1)C[C@@H]4[C@@]3(CC[C@H]5[C@H]4CC=C6[C@@]5(CC[C@@H](C6)O[C@H]7[C@@H]([C@H]([C@@H]([C@H](O7)CO)O[C@H]8[C@@H]([C@@H]([C@H]([C@@H](O8)C)O)O)O)O)O[C@H]9[C@@H]([C@@H]([C@H]([C@@H](O9)C)O)O)O)C)C)C	442971		C10796				CHEBI:10219		Organic compounds	Lipids and lipid-like molecules	Sterol lipids	Steroidal glycosides	Steroidal saponins	482523	242044	2036693	104587	877360	334786	326906	465500	158347	175210	53055	78864	15290	35424	32102	53266	59556	215716	13439	15296	9317	142950	31381	21452	23204
802	11.34_900.84	900.837	11.343	[M+NH4]+	MSI 2	lipidomics	TG O-55:4|TG O-19:2_18:1_18:1	LNWGWOPKHLORMO-UHFFFAOYSA-N												Organic compounds	Lipids and lipid-like molecules	Glycerolipids	Triradylcglycerols	TG		18773		21258	12676	16105	24213	7977	21154	7649	95064	101563	113808		107077	68663	120041	61232	71310	130986
803	3.90_432.35	432.348	3.898	[M+H]+	MSI 2	polyphenols	Peimine	IUKLSMSEHKDIIP-BZMYINFQSA-N	431.652	C27H45NO3	C[C@H]1CC[C@H]2[C@@]([C@H]3CC[C@@H]4[C@H]([C@@H]3CN2C1)C[C@H]5[C@H]4C[C@@H]([C@@H]6[C@@]5(CC[C@@H](C6)O)C)O)(C)O	131900		C10830				CHEBI:9970		Organic compounds	Lipids and lipid-like molecules	Sterol lipids	Steroidal alkaloids	Cerveratrum-type alkaloids	39150	85025	75526	27487	68223	90237	35314	112572	42001	66070	43210	51382	29263	29989	44106	49590	21301	26842	41635	29326			7244
804	6.31_339.29	339.29	6.314	[M+H-H2O]+	MSI 2	polyphenols	Monoelaidin	RZRNAYUHWVFMIP-MDZDMXLPSA-N	356.541	C21H40O4	CCCCCCCC/C=C/CCCCCCCC(=O)OCC(CO)O	5364833								Organic compounds	Lipids and lipid-like molecules	Glycerolipids	Monoradylglycerols	Monoacylglycerols	1887223	2596806	3906574	1799485	2318868	3996620	1757884	4584469	1243431	3184067	721463	970241	521076	1095077	1264362	1181306	980575	1570478	1312764	1166704	8558726	10794346	12263732	16767676	15397367
805	5.24_301.22	301.217	5.242	[M+H-H2O]+	MSI 2	polyphenols	5-HEPE	FTAGQROYQYQRHF-FCWZHQICSA-N	318.451	C20H30O3	CC/C=C\C/C=C\C/C=C\C/C=C\C=C\C(CCCC(=O)O)O	6439678	HMDB0005081		LMFA03070027			CHEBI:72801		Organic compounds	Lipids and lipid-like molecules	Fatty Acyls	Eicosanoids	Hydroxyeicosapentaenoic acids	1170871	1340750	1696969	781769	1370201	2285818	632973	2048777	911245	1356857	3029292	3696982	1957518	2471080	3174449	2573229	2669270	2718731	2538684	2048166	284401	361216	181042	301468	283489
806	3.86_318.18	318.182	3.862	[M+H]+	MSI 2	polyphenols	Trp-Leu	LYMVXFSTACVOLP-ZFWWWQNUSA-N	317.383	C17H23N3O3	CC(C)C[C@@H](C(=O)[O-])NC(=O)[C@H](CC1=CNC2=CC=CC=C21)[NH3+]	6997509						CHEBI:74871		Organic compounds	Organic acids and derivatives	Carboxylic acids and derivatives	Amino acids, peptides, and analogues	Peptides	12372	16490	17845	4376	18702	26464	4572	35421		22492	67368	46633	19354	35219	36392	31649	41991	53178	30948	20325	200895	268505	177647	309168	254173
807	6.31_297.28	297.279	6.311	[M+H-H2O]+	MSI 2	polyphenols	Methyl 12-hydroxystearate	RVWOWEQKPMPWMQ-UHFFFAOYSA-N	314.504	C19H38O3	CCCCCCC(CCCCCCCCCCC(=O)OC)O	8840					27087			Organic compounds	Lipids and lipid-like molecules	Fatty Acyls	Fatty alcohols	Fatty alcohols	2043639	2678078	3459880	1580757	2304035	4579571	1854914	4518743	1244725	3453806	3189892	3075168	1551232	4374839	5836025	5122904	3759462	4899914	4650922	2993462	7060752	10149392	11896232	13465593	13400492
808	4.59_172.10	172.097	4.591	[M+H]+	MSI 2	biogenic amines	1-Acetamidocyclopentane-1-carboxylic acid	WMLJYVSRHSZWQY-UHFFFAOYSA-N	171.194	C8H13NO3	CC(=O)NC1(CCCC1)C(=O)O	229296								Organic compounds	Organic acids and derivatives	Carboxylic acids and derivatives	Amino acids, peptides, and analogues	Amino acids and derivatives	53442	61741	39934	51671	42855	52913	71638	36590	59049	53212	146354	108488	141356	147259	107385	101941	109863	100097	116420	120463	477921	358247	433740	392815	501460
809	6.74_574.56_6.74_592.57	574.5562_592.5665	6.74_6.738	[M+H-H2O]+_[M+H]+	MSI 2	lipidomics	Cer 38:2;O2|Cer 18:1;O2/20:1	VJSANVIMIYPTLW-UHFFFAOYSA-N												Organic compounds	Lipids and lipid-like molecules	Sphingolipids	Ceramides	Long-chain ceramides	53396	102324	91771	88159	86578	69080	88101	79974	101774	111011	170426	166188	205476	122140	172815	160969	156209	123441	194627	228226	633772	341562	462343	390803	520631
810	6.00_163.15	163.148	6	[M+H-2H2O]+	MSI 2	polyphenols	cis-5-Dodecenoic acid	IJBFSOLHRKELLR-FPLPWBNLSA-N	198.302	C12H22O2	CCCCCC/C=C\CCCC(=O)O	5312378	HMDB0000529		LMFA01030226					Organic compounds	Lipids and lipid-like molecules	Fatty Acyls	Fatty acids and conjugates	Medium-chain fatty acids	1595475	2487132	2703571	1497009	1932695	3614359	2326279	3211769	1650182	4430879	2248367	2508332	1588878	2331954	3004063	2709314	2528812	2899675	2749428	1960329	9253613	13268246	18470597	16915732	15172556
811	9.49_129.10	129.102	9.488	[M+H]+	MSI 2	biogenic amines	N-Methyl-L-prolinamide	URHXQSTYLJNJMT-YFKPBYRVSA-N	128.173	C6H12N2O	CNC(=O)[C@@H]1CCCN1	10374482								Organic compounds	Organic acids and derivatives	Carboxylic acids and derivatives	Amino acids, peptides, and analogues	Amino acids and derivatives	393255	368270	298560	325286	284528	350523	472026	321662	362802	329164	978217	952106	1120324	903894	970137	827520	841514	898366	818335	950552	108171	76999	81756	81545	110640
812	3.66_166.12	166.123	3.657	[M+H]+	MSI 2	biogenic amines	Hordenine	KUBCEEMXQZUPDQ-UHFFFAOYSA-N	165.233	C10H15NO	CN(C)CCC1=CC=C(C=C1)O	68313	HMDB0004366	C06199				CHEBI:5764		Organic compounds	Benzenoids	Benzene and substituted derivatives	Phenethylamines	Phenethylamines	112123	131010	62494	88859	87792	115372	171700	108326	73921	96621	283793	254241	338353	272505	281120	233133	277747	202806	218661	249019	1039247	726718	1094385	860125	1087444
813	1.14_319.26	319.263	1.138	[M+H-H2O]+	MSI 2	biogenic amines	8,11-Tridecadienoic acid, 13-(3-pentyl-2-oxiranyl)-, methyl ester, (8Z,11Z)-	FZUFCVATWQINBH-PYQKRGIJSA-N	336.266	C21H36O3	CCCCC[C@@H]1[C@@H](O1)C/C=C\C/C=C\CCCCCCC(=O)OC	124518521								Organic compounds	Lipids and lipid-like molecules	Fatty Acyls	Fatty acid esters	Fatty acid methyl esters	229186	96902	48889	28627	208145	33478	62002	47388	26154	26438	185224	130656	86779	204462	55103	216191	434205	185711	172066	22529	658117	297944	404001	422593	1001352
814	5.27_510.49_5.27_492.48	510.488_492.4773	5.267_5.267	[M+H]+_[M+H-H2O]+	MSI 2	lipidomics	Cer 32:1;O2|Cer 18:1;O2/14:0	ZKRPGPZHULJLKJ-UHFFFAOYSA-N	509.849	C32H63NO3	CCCCCCCCCCCCCC=CC(C(CO)NC(=O)CCCCCCCCCCCCC)O	5176144								Organic compounds	Lipids and lipid-like molecules	Sphingolipids	Ceramides	Long-chain ceramides	289552	406880	414029	293659	438561	429010	385865	377966	432117	371515	689644	706690	831993	582268	778101	798116	892116	653609	762894	1026501	2396264	1641343	2493968	2254963	2415670
815	1.04_275.20	275.2	1.037	[M+Na]+	MSI 3	biogenic amines	Nandrolone	NPAGDVCDWIYMMC-IZPLOLCNSA-N	274.399	C18H26O2	C[C@]12CC[C@H]3[C@H]([C@@H]1CC[C@@H]2O)CCC4=CC(=O)CC[C@H]34	9904	HMDB0002725	C07254	LMST02010044		23350	CHEBI:7466		Organic compounds	Lipids and lipid-like molecules	Sterol lipids	Estrane steroids	Estrogens and derivatives	73439	97406	65589	76276	748167	100685	172029	131821	40339	60099	201548	103014	230031	207308	139508	187298	167550	188237	138955	93441	22384	18371	12621	24221	18056
816	4.87_238.09	238.09	4.873	[M+H]+	MSI 2	biogenic amines	1-(3-Fluoro-4-methylphenyl)-5-oxo-3-pyrrolidinecarboxylic acid	DEFUAHXVPYNTKQ-UHFFFAOYSA-N	237.227	C12H12FNO3	CC1=C(C=C(C=C1)N2CC(CC2=O)C(=O)O)F	2986484								Organic compounds	Organoheterocyclic compounds	Pyrrolidines	Phenylpyrrolidines	Phenylpyrrolidines	86344	76355	64529	44254	57019	68970	99605	51985	96260	57038	186867	189517	172658	173779	164370	174514	172186	157756	165867	209851				3410	12005
817	5.08_734.60	734.595	5.079	[M+H-H2O]+	MSI 2	lipidomics	HexCer 38:3;2O|HexCer 18:1;2O/20:2	CTGKBCKUAHEIBZ-UHFFFAOYSA-N												Organic compounds	Lipids and lipid-like molecules	Sphingolipids	Glycosphingolipids	HexCer	91830	149444	50199	23678	47479	51591	63816	45066	56734	37001	13039		46891					33153		24668	271020	67958	289257	291909	281117
818	8.76_332.08	332.076	8.759	[2M+K]+	MSI 3	biogenic amines	dAMP	KHWCHTKSEGGWEX-RRKCRQDMSA-N	331.222	C10H14N5O6P	C1[C@@H]([C@H](O[C@H]1N2C=NC3=C(N=CN=C32)N)COP(=O)(O)O)O	12599	HMDB0000905	C00360				CHEBI:17713		Organic compounds	Nucleosides, nucleotides, and analogues	Purine nucleotides	Purine deoxyribonucleotides	Purine deoxyribonucleoside monophosphates	119567	116876	89004	98290	62267	87241	145512	108253	81731	118804	4147	30801	30775	33589	19340	39817	30339	22297		37668	6639	6582		8950	17977
819	10.40_820.74_10.40_825.69	820.7393_825.6946	10.403_10.404	[M+NH4]+_[M+Na]+	MSI 1	lipidomics	TG 48:2|TG 12:0_18:1_18:1	SJWUGKDDADDDHD-UHFFFAOYSA-N	802.705	C51H94O6	CCCCCCCCCCCC(=O)OCC(COC(=O)CCCCCCCC=CCCCCCCCC)OC(=O)CCCCCCCC=CCCCCCCCC	76464025								Organic compounds	Lipids and lipid-like molecules	Glycerolipids	Triradylcglycerols	TG	1435017	1715978	2816539	1536747	2288050	2098713	3655484	1930964	3484421	2040755	612636	559503	816663	1383981	602866	653653	954793	589472	921900	872294	16225575	13548407	19528736	22522896	15377481
820	4.10_363.33	363.327	4.102	[M-H]-	MSI 2	lipidomics	Tetracosadienoic acid	HQHCYKULIHKCEB-UHFFFAOYSA-N	258.354	C14H26O4	C(CCCCCCC(=O)O)CCCCCC(=O)O	13185	HMDB0000872		LMFA01170018			CHEBI:76308		Organic compounds	Lipids and lipid-like molecules	Fatty Acyls	Fatty acids and conjugates	Long-chain fatty acids	903050	882873	963887	951001	803408	1056657	676226	996116	873547	871428	3119553	2694575	2935876	3253378	2219205	2274889	2976544	2626559	2358503	3054623	8370250	7785621	7239356	6728489	6072737
821	4.79_592.49	592.494	4.794	[M+NH4]+	MSI 2	lipidomics	SE 24:1;O4/12:0	UYEDYUMWUKRZOV-UHFFFAOYSA-N												Organic compounds	Lipids and lipid-like molecules	Sterol lipids	Steroid esters	SE	38824	105590	30724	30437	47847	61959	31507	41691	27080	56132	83152	82837	100468	41921	75016	78092	100064	56520	92138	120109	316729	274058	299726	314253	323958
822	6.02_188.13	188.128	6.02	[M+H]+	MSI 2	biogenic amines	8-Amino-7-oxononanoic acid	GUAHPAJOXVYFON-UHFFFAOYSA-N	187.237	C9H17NO3	CC(C(=O)CCCCCC(=O)O)N	173		C01092	LMFA01060168			CHEBI:15830	8-AMINO-7-OXONONANOATE	Organic compounds	Lipids and lipid-like molecules	Fatty Acyls	Fatty acids and conjugates	Medium-chain fatty acids	1581144	1493220	1121872	1231939	1223989	1267809	1841254	1241931	1252027	1332426	3738122	3397273	3490245	3320681	3072735	3572176	3590219	3028389	3015481	3063714	403447	337644	409058	338415	439422
823	6.04_337.27	337.274	6.043	[M+H-H2O]+	MSI 2	polyphenols	MG 18:2 9Z,12Z	WECGLUPZRHILCT-FQEVSTJZSA-N	354.525	C21H38O4	CCCCCC=CCC=CCCCCCCCC(=O)OC[C@H](CO)O	92175								Organic compounds	Lipids and lipid-like molecules	Fatty Acyls	Lineolic acids and derivatives	Lineolic acids and derivatives	5416539	7943466	8993499	5040979	6250808	10150748	5192178	9434129	4212515	5426938	11335521	13891203	8678284	13804860	13553916	12889256	10890132	13782479	12468122	9448169	28356441	36817976	32855772	45433383	44950412
824	7.48_202.12	202.119	7.476	[M+H-H2O]+	MSI 2	biogenic amines	2-(Cyclohexylamino)benzoic acid	JSXMFCCPQQJLCR-UHFFFAOYSA-N	219.28	C13H17NO2	C1CCC(CC1)NC2=CC=CC=C2C(=O)O	19826721				DB07038				Organic compounds	Benzenoids	Benzene and substituted derivatives	Benzoic acids and derivatives	Aminobenzoic acids and derivatives	428497	540745	407405	401147	359913	464698	614908	403589	423918	485636	1133470	1231847	1200565	1206444	984892	1179299	1064589	1013624	911648	905223	125234	91254	132969	106906	126596
825	6.00_191.18	191.18	6.002	[M+H-H2O]+	MSI 2	polyphenols	1-(Cyclododec-1-en-1-yl)ethanone	MLCBOXBUBJRZHC-KAMYIIQDSA-N	208.34	C14H24O	CC(=O)/C/1=C\CCCCCCCCCC1	6365623								Organic compounds	Organic oxygen compounds	Organooxygen compounds	Carbonyl compounds	Ketones	1160255	1739623	2010893	1083793	1532889	2674830	1655962	2344449	1206162	3328064	1607034	1812565	1245643	1827046	2199742	1800098	1874131	2015938	1878245	1431096	6799593	9382605	13940499	13033680	10519373
826	10.56_690.62	690.619	10.558	[M+NH4]+	MSI 2	lipidomics	CE 20:4	IMXSFYNMSOULQS-BEDFLICRSA-N	673.107	C47H76O2	CCCCC/C=C\C/C=C\C/C=C\C/C=C\CCCC(=O)O[C@H]1CC[C@@]2([C@H]3CC[C@]4([C@H]([C@@H]3CC=C2C1)CC[C@@H]4[C@H](C)CCCC(C)C)C)C	6479222	HMDB0006726		LMST01020014			CHEBI:82751		Organic compounds	Lipids and lipid-like molecules	Sterol lipids	Steroid esters	Cholesteryl esters	24290	35087	16329	21876	26606	61537	42028	19044	36422	20397	104960	73002	91500	12215	94836	73417	97008	95526	103520	76311	156164	266573	239516	217770	202834
827	4.54_367.21	367.213	4.536	[M-H]-	MSI 2	biogenic amines	Thromboxane B3	OYPPJMLKAYYWHH-NXJDUNGTSA-N	368.465	C20H32O6	CC/C=C\C[C@@H](/C=C/[C@@H]1[C@H]([C@H](CC(O1)O)O)C/C=C\CCCC(=O)O)O	5283140			LMFA03030006			CHEBI:84444		Organic compounds	Lipids and lipid-like molecules	Fatty Acyls	Eicosanoids	Thromboxanes	300108	199839	182233	178751	174702	238549	273045	198531	259836	212236	561751	571498	612843	657860	724001	646268	620981	577557	559946	522973	48676	40627	47408	39154	54670
828	6.01_346.27	346.272	6.014	[M+H-H2O]+	MSI 2	polyphenols	Leukotriene B4 dimethylamide	BBJRTSLPWQUASB-DBBPNLNOSA-N	363.535	C22H37NO3	CCCCC/C=C\C[C@@H](/C=C/C=C\C=C\[C@@H](CCCC(=O)N(C)C)O)O	6439635								Organic compounds	Lipids and lipid-like molecules	Fatty Acyls	Fatty amides	N-acyl amines	128891	435630	248365	182371	145675	228430	185918	194162	128309	228991	501212	549737	359204	592360	697598	562066	445668	568587	420132	338142	974038	1183871	1070812	1212627	1417343
829	5.37_193.05	193.05	5.368	[M+H]+	MSI 3	polyphenols	4-Methylesculetin	KVOJTUXGYQVLAJ-UHFFFAOYSA-N	192.168	C10H8O4	CC1=CC(=O)OC2=CC(=C(C=C12)O)O	5319502	HMDB0136755							Organic compounds	Phenylpropanoids and polyketides	Coumarins and derivatives	Hydroxycoumarins	6,7-dihydroxycoumarins	13370	15337	33652	9652	17611	31799	5623	22019	8716	24410	31115	19922	37400	19306	23450	26196	15321	26921	24470	18577	96750	121283	82976	122688	116429
830	1.70_283.17	283.166	1.699	[M+Na]+	MSI 2	polyphenols	Carisoprodol	OFZCIYFFPZCNJE-UHFFFAOYSA-N	260.33	C12H24N2O4	CCCC(C)(COC(=O)N)COC(=O)NC(C)C	2576	HMDB0014539	C07927		DB00395	30971	CHEBI:3419		Organic compounds	Organic acids and derivatives	Carboxylic acids and derivatives	Amino acids, peptides, and analogues	Amino acids and derivatives	3537110	3152126	3802716	2167680	3289791	5029458	1310439	4519240	2581251	3013524	6867732	8120165	5192248	5624325	6520879	5849843	6507749	6530348	6153841	4581108	625804	798256	504252	841346	749040
831	2.40_317.25	317.248	2.398	[M-H]-	MSI 2	lipidomics	Heneicosatetraenoic acid	FKUZSZSHDNEWMR-OOHUXFJYSA-N	318.494	C21H34O2	CCCCCCCCCCCC/C=C/C=C/C=C/C=C/C(=O)O	71774758								Organic compounds	Lipids and lipid-like molecules	Fatty Acyls	Fatty acids and conjugates	Long-chain fatty acids	636608	856268	465940	541121	458431	641687	576687	713267	443910	495847	340410	410017	565904	567030	495538	450711	552981	336586	326643	569700	3909732	3451426	4398410	3082764	4008395
832	5.82_264.11	264.11	5.82	[M+H]+	MSI 2	biogenic amines	(-)-Neplanocin A	XUGWUUDOWNZAGW-CNUIFLNQSA-N	263.253	C11H13N5O3	C1=C([C@@H]([C@@H]([C@H]1N2C=NC3=C(N=CN=C32)N)O)O)CO	490421								Organic compounds	Nucleosides, nucleotides, and analogues	Nucleoside and nucleotide analogues	Cyclopentyl nucleosides	1,3-substituted cyclopentyl nucleosides	728182	777632	580708	675625	620107	592384	787288	686848	730494	741424	1184803	1191895	1194600	1356158	1162180	1253041	1165452	1202425	982546	1230980	152251	147238	157278	148091	155536
833	5.08_720.56	720.556	5.081	[M+NH4]+	MSI 2	lipidomics	SE 24:1;O4/22:6	QCSVCJLAZMOWSH-UHFFFAOYSA-N												Organic compounds	Lipids and lipid-like molecules	Sterol lipids	Steroid esters	SE	487440	575144	407608	439123	485383	613719	491712	393083	488231	380665	550282	703292	824353	488457	920187	763344	1012145	665845	875940	970518	2861383	1674225	2878896	2682700	2680342
834	7.34_118.09	118.086	7.336	[M+H]+	MSI 2	biogenic amines	2S-Aminopentanoic acid	SNDPXSYFESPGGJ-SCSAIBSYSA-N	117.147	C5H11NO2	CCC[C@H](C(=O)O)N	439575	HMDB0013716	C01799				CHEBI:28804		Organic compounds	Organic acids and derivatives	Carboxylic acids and derivatives	Amino acids, peptides, and analogues	Amino acids and derivatives	37875836	42502454	30563106	29781928	29038954	34703778	49100363	33008473	35459324	36513584	75189693	82076200	84613135	77150814	74036911	84951516	87672216	85753949	71815397	72381183	324445853	229864724	299977160	270979025	355456758
835	1.06_343.16	343.155	1.059	[M-H]-	MSI 2	biogenic amines	Galdosol	SWVDNEGGBBYXGS-UWVAXJGDSA-N	344.402	C20H24O5	CC(C)C1=C(C(=C2C(=C1)C(=O)[C@@H]3[C@@H]4[C@@]2(CCCC4(C)C)C(=O)O3)O)O	13966127								Organic compounds	Lipids and lipid-like molecules	Prenol lipids	Terpene lactones	Diterpene lactones	13307	12583	7495	13652	27586	25845	24206	13189	22789	35288	70146	82419	71845	175412	100109	90334	53003	80787	56818	44056	155866	123433	159034	188883	195956
836	2.92_367.22	367.224	2.92	[M+Na]+	MSI 2	polyphenols	20-HDoHE	YUZXOJOCNGKDNI-LFVREGEGSA-N	344.489	C22H32O3	CCC(/C=C/C=C\C/C=C\C/C=C\C/C=C\C/C=C\CCC(=O)O)O	16061143			LMFA04000033			CHEBI:72615		Organic compounds	Lipids and lipid-like molecules	Fatty Acyls	Fatty acids and conjugates	Very long-chain fatty acids	34876	14633	30394	8404	36992	39244	5433	42089	22872	19934	52200	71746	22123	45240	62970	58168	62649	70910	66957	39799		6639	4899	11927
837	7.22_183.08	183.085	7.224	[M+H]+	MSI 2	biogenic amines	2-Amino-N-(4-fluoro-2-methylphenyl)acetamide	UDPZJCBLPCNAGG-UHFFFAOYSA-N	182.195	C9H11FN2O	CC1=C(C=CC(=C1)F)NC(=O)CN	24692398								Organic compounds	Organic acids and derivatives	Carboxylic acids and derivatives	Amino acids, peptides, and analogues	Amino acids and derivatives	81428	87491	63244	77489	64760	75944	82470	88966	61459	106097	77127	109953	95744	164479	41670	72439	92465	58587	90426	72301	10739	93035	10427		11885
838	6.35_347.30	347.296	6.346	[M+H]+	MSI 2	polyphenols	cis-4,10,13,16-Docosatetraenoic acid methyl ester	JXKCBSKPWHNCFL-MUDRAGMJSA-N	346.547	C23H38O2	CCCCC/C=C\C/C=C\C/C=C\CCCC/C=C\CCC(=O)OC	16211081								Organic compounds	Lipids and lipid-like molecules	Fatty Acyls	Fatty acid esters	Fatty acid methyl esters	400360	758160	929258	411456	592800	994629	480544	1176477	242188	793914	200677	222313	74788	245693	271599	274173	231766	259685	240375	218540	1941012	2739118	2911507	3464484	3145733
839	2448	156	404121	[M]*+	MSI 1	primary metabolism	Pipecolic acid	HXEACLLIILLPRG-UHFFFAOYSA-N	129.157	C6H11NO2	C1CCNC(C1)C(=O)O	25200477	HMDB0000070					CHEBI:17964		Organic compounds	Organic acids and derivatives	Carboxylic acids and derivatives	Amino acids, peptides, and analogues	Amino acids and derivatives	49165	52845	47370	54573	42934	56902	47546	42571	60624	47817	130695	133609	135667	140852	137690	131329	106137	110107	134544	136837	308379	302186	253072	280232	337467
840	5.92_582.51	582.511	5.917	[M-H]-	MSI 2	lipidomics	Cer 35:1;O4|Cer 18:0;O3/17:1;(2OH)	LUBNGGRODLZNDW-UHFFFAOYSA-N												Organic compounds	Lipids and lipid-like molecules	Sphingolipids	Ceramides	Long-chain ceramides	1834071	2193833	2239355	2008968	1999026	2310408	1899679	2698293	2133464	1949480	3493092	3038460	3638528	3291202	3460426	3036005	3075659	3040652	3346307	2745920	13050121	13683137	10797878	12211226	12463579
841	1.37_300.29	300.29	1.373	[M+H]+	MSI 2	lipidomics	Sphingosine	WWUZIQQURGPMPG-KRWOKUGFSA-N	299.493	C18H37NO2	CCCCCCCCCCCCC/C=C/[C@H]([C@H](CO)N)O	5280335		C00319	LMSP01010001			CHEBI:16393		Organic compounds	Organic nitrogen compounds	Organonitrogen compounds	Amines	Alkanolamines	1324744	1668603	1445510	1419768	1450163	1495086	1400211	1322391	1574734	1371531	3094557	3007819	3308490	3567703	2931413	2910683	3150121	2687011	2894829	3549786	9028252	10650106	8230442	8211038	9786940
842	9.68_890.78	890.781	9.683	[M+NH4]+	MSI 2	lipidomics	TG 52:3;1O|TG 16:0_18:1_18:2;1O	DFCBOWJIHNPXMG-UHFFFAOYSA-N												Organic compounds	Lipids and lipid-like molecules	Glycerolipids	Triradylcglycerols	TG	197469	606126	417680	235718	633388	414927	232514	156007	624634	219891	9709	13679	72421	27994	45926	26601	112064	58894	54214	162824	2311505	1125598	4568750	2312424	1336789
843	7.78_608.60	608.597	7.782	[M+H]+	MSI 2	lipidomics	Cer 39:1;O2|Cer 16:1;O2/23:0	WYSRACVJQVNCRW-UHFFFAOYSA-N	607.59	C39H77NO3	CCCCCCCCCCCCCCCCCCCCCCC(=O)NC(CO)C(C=CCCCCCCCCCCC)O	72778956								Organic compounds	Lipids and lipid-like molecules	Sphingolipids	Ceramides	Long-chain ceramides	51851	79512	90487	94175	100846	78187	93890	84539	97237	91331	93289	87396	117225	29617	121582	111872	132192	92321	94665	115402	435102	450868	378978	417171	455761
844	0.69_272.26	272.258	0.694	[M+H]+	MSI 2	lipidomics	Myristoyl-EA	JHIXEZNTXMFXEK-UHFFFAOYSA-N	271.439	C16H33NO2	CCCCCCCCCCCCCC(=O)NCCO	8890			LMFA08040042			CHEBI:85262		Organic compounds	Organic nitrogen compounds	Organonitrogen compounds	Amines	Alkanolamines	4249049	5722081	4611082	3996044	4336206	4333460	5626645	4512674	4258471	4449078	6574301	6663341	6814292	6690386	6491211	5317426	8142256	5958737	6500549	5223552	548898	935370	570664	635467	777953
845	5.09_247.14	247.144	5.092	[M+H-C6H7N]+	MSI 2	biogenic amines	Octanediamide, N1-(2-aminophenyl)-N8-phenyl-	RFLHBLWLFUFFDZ-UHFFFAOYSA-N	339.432	C20H25N3O2	C1=CC=C(C=C1)NC(=O)CCCCCCC(=O)NC2=CC=CC=C2N	9543540						CHEBI:61077		Organic compounds	Benzenoids	Benzene and substituted derivatives	Anilides	2'-Aminoanilides	637819	721488	517883	545812	494403	590206	762562	576103	573208	524007	1198222	1475708	1572246	1449089	1311963	1371650	1325135	1371844	1132503	1223643	152121	99754	134314	133732	170503
846	9.47_170.09	170.093	9.472	[M+H]+	MSI 1	biogenic amines	3-Methyl-L-histidine	JDHILDINMRGULE-LURJTMIESA-N	169.181	C7H11N3O2	CN1C=NC=C1C[C@@H](C(=O)O)N	64969	HMDB0000479	C01152				CHEBI:27596	CPD-1823	Organic compounds	Organic acids and derivatives	Carboxylic acids and derivatives	Amino acids, peptides, and analogues	Amino acids and derivatives	346639	357066	299188	322767	280025	317680	367892	328277	352314	313937	668556	638087	693433	645707	608133	609571	541916	597589	515752	651999	2023964	1661633	2280214	1930750	2627351
847	5.22_534.49	534.488	5.22	[M+H]+	MSI 2	lipidomics	Cer 34:3;O2|Cer 18:2;O2/16:1	VHPCEGFOAKXVAQ-UHFFFAOYSA-N												Organic compounds	Lipids and lipid-like molecules	Sphingolipids	Ceramides	Ceramides	404957	433804	437571	395760	357207	502619	441643	445973	476926	457196	604091	658023	702303	745338	579112	519366	744260	643767	744653	880596	2248183	1419792	2014381	1740274	2122574
848	1.29_325.27	325.275	1.29	[M-H]-	MSI 2	lipidomics	FA 20:1;O	KAQZCVMCZHNZFA-UHFFFAOYSA-N												Organic compounds	Lipids and lipid-like molecules	Fatty Acyls	Fatty acids and conjugates	Fatty acids	100575	134306	148581	143456	122258	140183	111700	141256	154604	154211	345314	390555	476982	419523	359577	296469	366679	370708	328917	411313	1150099	1240522	1057467	940303	1021276
849	131445	333	669400	[M]*+	MSI 1	primary metabolism	DL-Galacturonic acid	IAJILQKETJEXLJ-RSJOWCBRSA-N	194.14	C6H10O7	C(=O)[C@@H]([C@H]([C@H]([C@@H](C(=O)O)O)O)O)O	84740	HMDB0002545					CHEBI:47962		Organic compounds	Organic oxygen compounds	Organooxygen compounds	Carbohydrates and carbohydrate conjugates	Sugar acids and derivatives	161055	152931	178833	163162	152479	170760	173922	172024	155716	135211	227182	272740	280934	320843	296268	290249	285946	305350	264712	331481	753767	591286	726795	758121	711758
850	6.79_158.12	158.118	6.794	[M+H]+	MSI 2	biogenic amines	3-Cyclopentylalanine	KDYAKYRBGLKMAK-ZETCQYMHSA-N	157.211	C8H15NO2	C1CCC(C1)C[C@@H](C(=O)[O-])[NH3+]	7000136								Organic compounds	Organic acids and derivatives	Carboxylic acids and derivatives	Amino acids, peptides, and analogues	Amino acids and derivatives	888785	1013954	673141	768903	659757	845189	1219145	798278	902603	860943	2039983	2056359	2049212	1987761	1774957	2083488	1994954	1885571	1717671	1830034	7403487	5378142	7551422	6766018	8683777
851	4.31_251.18	251.175	4.312	[M+H-C2H4]+	MSI 2	biogenic amines	Diethyl decylphosphonate	HYQXIVAZQBYBAF-UHFFFAOYSA-N	278.368	C14H31O3P	CCCCCCCCCCP(=O)(OCC)OCC	2773697								Organic compounds	Organic acids and derivatives	Organic phosphonic acids and derivatives	Phosphonic acid diesters	Dialkyl alkylphosphonates	714953	792976	611113	600015	580224	591334	837905	613941	639570	639181	1509405	1696475	1780640	1651824	1523897	1687626	1826500	1551128	1240855	1481609	178967	137640	169458	157417	188025
852	1.71_165.06	165.055	1.714	[M+H-H2O]+	MSI 2	polyphenols	p-Hydroxyphenyllactic acid	JVGVDSSUAVXRDY-UHFFFAOYSA-N	182.174	C9H10O4	C1=CC(=CC=C1CC(C(=O)O)O)O	9378	HMDB0000755	C03672				CHEBI:17385		Organic compounds	Phenylpropanoids and polyketides	Phenylpropanoic acids		Phenylpropanoic acids	45286	51792	37623	36757	20290	65892	80157	37001	58787	47350	70212	40144	35501	26813	65853	17668	23077	59199	22657	25916	250103	295403	269793	327296	322610
853	5.79_316.15	316.155	5.792	[M+H]+	MSI 2	biogenic amines	Oxycodone	BRUQQQPBMZOVGD-XFKAJCMBSA-N	315.364	C18H21NO4	CN1CC[C@]23[C@@H]4C(=O)CC[C@]2([C@H]1CC5=C3C(=C(C=C5)OC)O4)O	5284603	HMDB0014640	C08018		DB00497	23407	CHEBI:7852		Organic compounds	Benzenoids	Phenanthrenes and derivatives		Phenanthrenes and derivatives	1293965	1268782	849366	1019463	917289	1175013	1589352	938618	1053280	1172803	2624382	2685428	2640791	2798250	2614763	2644848	2846892	2641742	1746903	2455141	263957	192253	249936	215232	302114
854	6.87_117.10	117.102	6.871	[M+H]+	MSI 2	biogenic amines	N-(3-Aminopropyl)acetamide	YFZBPSXRYCOKCW-UHFFFAOYSA-N	116.162	C5H12N2O	CC(=O)NCCCN	13793967								Organic compounds	Organic acids and derivatives	Carboxylic acids and derivatives	Carboxylic acid derivatives	Carboxylic acid amides	250636	246875	208492	217903	177740	194452	286874	209882	232966	232657	516859	605895	578129	560107	508591	498234	552681	470636	474906	530539	2081249	1482883	1885445	1683843	2093885
855	5.92_422.29	422.291	5.922	[M+Na]+	MSI 3	polyphenols	Lovastatin	PCZOHLXUXFIOCF-BXMDZJJMSA-N	404.541	C24H36O5	CC[C@H](C)C(=O)O[C@H]1C[C@H](C=C2[C@H]1[C@H]([C@H](C=C2)C)CC[C@@H]3C[C@H](CC(=O)O3)O)C	53232	HMDB0014372	C07074		DB00227	20784			Organic compounds	Organoheterocyclic compounds	Lactones	Delta valerolactones	Delta valerolactones	728756	682291	813140	464394	774023	1167912	480028	1206001	593112	780185	1444303	1634030	956098	1104313	1395360	1280220	1220310	1477561	1421813	1116425	92295	149925	115343	204341	231566
856	3.88_211.13	211.133	3.885	[M+H-H2O]+	MSI 2	polyphenols	3-(5,6-Dihydroxyheptyl)-4-methyl-2H-furan-5-one	HNNQILZBIHECCU-UHFFFAOYSA-N	228.285	C12H20O4	CC1=C(COC1=O)CCCCC(C(C)O)O	45359400								Organic compounds	Lipids and lipid-like molecules	Fatty Acyls	Fatty alcohols	Fatty alcohols	77808	65657	98000	57271	72433	115566	37959	107881	60097	69380	134437	137652	118911	108107	142722	116134	140190	140807	143522	96400	429210	608217	368623	579686	545139
857	2.18_145.05	145.05	2.178	[M-H]-	MSI 1	biogenic amines	Adipic acid	WNLRTRBMVRJNCN-UHFFFAOYSA-N	146.141	C6H10O4	C(CCC(=O)O)CC(=O)O	196	HMDB0000448	C06104	LMFA01170048		21605	CHEBI:30832		Organic compounds	Lipids and lipid-like molecules	Fatty Acyls	Fatty acids and conjugates	Medium-chain fatty acids	17941321	17131887	12201291	13364445	12091611	15910840	23025679	14831622	18224601	14290335	36687524	38458751	39931684	35861023	40683104	40085814	36471631	38803872	31726350	34220456	120576156	82729201	112297439	98830728	122197235
858	4.50_670.54	670.542	4.495	[M+NH4]+	MSI 2	lipidomics	SE 24:1;O4/18:3	AHXOKELWZLQCQP-UHFFFAOYSA-N												Organic compounds	Lipids and lipid-like molecules	Sterol lipids	Steroid esters	SE	205057	251501	182093	191270	227250	214599	273149	238093	216996	201554	228032	295227	350531	413176	291292	258086	314929	290650	338127	381303	22454		46374	22719	9696
859	5.94_295.26	295.264	5.939	[M+H-H2O]+	MSI 2	polyphenols	Ricinoleic acid methyl ester	XKGDWZQXVZSXAO-ADYSOMBNSA-N	312.488	C19H36O3	CCCCCC[C@H](C/C=C\CCCCCCCC(=O)OC)O	5354133					29170			Organic compounds	Lipids and lipid-like molecules	Fatty Acyls	Fatty alcohols	Fatty alcohols	1945733	3096222	4266374	1994570	2671932	3810742	2002166	4475744	1481783	2552412	3325363	3677936	2304852	3782543	3647630	3993018	3336177	4174603	3498519	2931119	12860806	16198109	17764667	23037239	20433777
860	9.29_838.75	838.751	9.293	[M+CH3COO]-	MSI 2	lipidomics	Cer 49:1;O4|Cer 17:0;O2/17:0;(3OH)(FA 15:0)	ADXWNRFIPPOLTL-UHFFFAOYSA-N												Organic compounds	Lipids and lipid-like molecules	Sphingolipids	Ceramides	Long-chain ceramides	14032	22032	22159	18918	34629	29214	15653	44680	17206	24160	71807	56255	90907	93437	94513	59185	113618	86872	85478	120172	135435	135642	165672	143450	157740
861	9.25_738.70_9.26_774.68	738.6987_774.6754	9.252_9.258	[M-H]-_[M+Cl]-	MSI 2	lipidomics	Cer 46:0;O4|Cer 20:0;O3/26:0;(2OH)	CUUCRKRHESTOAG-UHFFFAOYSA-N	739.705	C46H93NO5	CCCCCCCCCCCCCCCCCCCCCCCCC(C(=O)NC(CO)C(C(CCCCCCCCCCCCCCCC)O)O)O	77908674								Organic compounds	Organic oxygen compounds	Organooxygen compounds	Alcohols and polyols	Secondary alcohols	180059	212266	257332	122717	225938	150636	184466	240709	171843	163434	639306	495531	497789	599179	670885	572794	671678	734710	536028	733884	38186	43383	39797	45171	28822
862	1.52_231.17	231.171	1.517	[M+H]+	MSI 2	polyphenols	DL-Leu-DL-Val	MDSUKZSLOATHMH-UHFFFAOYSA-N	230.304	C11H22N2O3	CC(C)CC(C(=O)NC(C(C)C)C(=O)O)N	352038	HMDB0028942							Organic compounds	Organic acids and derivatives	Carboxylic acids and derivatives	Amino acids, peptides, and analogues	Peptides	2373714	2448611	3194416	1768395	2691255	4323428	1500495	3999798	1895433	2700599	6070752	6988674	4170897	5128794	6817852	5724947	5904846	5905358	5631794	4568890	16975383	22816517	15407701	24123220	23458762
863	5.92_536.51	536.505	5.916	[M-H]-	MSI 2	lipidomics	Cer 34:1;O2|Cer 18:1;O2/16:0	YDNKGFDKKRUKPY-UHFFFAOYSA-N	537.902	C34H67NO3	CCCCCCCCCCCCCCCC(=O)NC(CO)C(C=CCCCCCCCCCCCCC)O	2498								Organic compounds	Lipids and lipid-like molecules	Sphingolipids	Ceramides	Ceramides	251374	326493	368206	308872	320217	386973	318081	467368	343103	288407	481133	382996	474536	428974	470568	428839	404725	426454	521716	358990	1759746	2026333	1559714	1743694	1772796
864	7.22_391.19	391.186	7.222	[2M+H]+	MSI 2	biogenic amines	O-Benzyl-L-serine	IDGQXGPQOGUGIX-VIFPVBQESA-N	195.216	C10H13NO3	C1=CC=C(C=C1)COC[C@@H](C(=O)O)N	6923806								Organic compounds	Organic acids and derivatives	Carboxylic acids and derivatives	Amino acids, peptides, and analogues	Amino acids and derivatives	1149195	1263361	851778	972508	706107	1131239	1107735	868358	826886	865401	2090264	2671205	3200278	2813307	2186095	2860156	2700969	2119405	2347898	2932638	399951	306318	303549	307802	319412
865	5.56_323.20	323.197	5.558	[M+H-C11H20N2O7]+	MSI 2	biogenic amines	Neomycin	PGBHMTALBVVCIT-VCIWKGPPSA-N	614.645	C23H46N6O13	C1[C@H]([C@@H]([C@H]([C@@H]([C@H]1N)O[C@@H]2[C@@H]([C@H]([C@@H]([C@H](O2)CN)O)O)N)O[C@H]3[C@@H]([C@@H]([C@H](O3)CO)O[C@@H]4[C@@H]([C@H]([C@@H]([C@@H](O4)CN)O)O)N)O)O)N	8378	HMDB0015129	C01737		DB00452	23359	CHEBI:7508		Organic compounds	Organic oxygen compounds	Organooxygen compounds	Carbohydrates and carbohydrate conjugates	Aminosaccharides	734141	906736	587327	583667	608321	726790	970073	702247	636506	754100	1683809	1872844	1845220	1921875	1835861	1770573	1631700	1705499	1367822	1338765	203768	155136	189729	167848	212010
866	5.75_632.52_5.75_637.48	632.5249_637.48	5.75_5.75	[M+NH4]+_[M+Na]+	MSI 2	lipidomics	DG 36:5|DG 18:2_18:3	PGXBELQFNRPKBC-UHFFFAOYSA-N	614.491	C39H66O5	CCCCCC=CCC=CCCCCCCCC(=O)OCC(CO)OC(=O)CCCCCCCC=CCC=CCC=CCC	85034078								Organic compounds	Lipids and lipid-like molecules	Fatty Acyls	Lineolic acids and derivatives	Lineolic acids and derivatives	94048268	100739633	156855116	74499722	174871136	136811528	157704170	105611104	121267220	94740513	36287278	22965288	122496647	56930141	29442973	42623289	71918229	29383062	40302686	53126701	30308848	18780834	61890956	20439756	21940216
867	2.33_477.30	477.304	2.331	[M-H]-	MSI 2	lipidomics	ST 28:2;O;S	FOEFJGLJLQXUDF-UHFFFAOYSA-N	478.312	C28H46O4S	CC(C)C(C)C=CC(C)C1CCC2C1(CCC3C2CC=C4C3(CCC(C4)OS(=O)(=O)O)C)C	163129426								Organic compounds	Lipids and lipid-like molecules	Sterol lipids	Ergostane steroids	Ergostane steroids	89453	460893	333559	350118	377297	451275	362596	512071	412758	418972	189320	251187	288588	237116	905207	848609	1000545	867672	862814	998538	209979	48399	2308942	1517319	1925658
868	7.46_315.19	315.192	7.458	[M+H-C5H10O2]+	MSI 2	biogenic amines	(4R,6R)-3,3,7,9-Tetramethyl-6-((3-methylbutanoyl)oxy)-11-oxotricyclo[5.4.0.02,8]undec-9-en-4-yl (2Z)-2-methylbut-2-enoate	SCDIIKOGQOUENK-FGRHQERASA-N	416.551	C25H36O5	C/C=C(/C)\C(=O)O[C@@H]1C[C@H](C2(C3C(C2C(=O)C=C3C)C1(C)C)C)OC(=O)CC(C)C	23928005								Organic compounds	Lipids and lipid-like molecules	Prenol lipids	Monoterpenoids	Bicyclic monoterpenoids	595132	745384	552373	592621	467178	625511	870064	560566	637087	669771	1521297	1561874	1686674	1602309	1308795	1606433	1409707	1414031	1229949	1418918	174044	85893	175905	160616	193634
869	10.02_348.19	348.188	10.021	[M+H]+	MSI 2	biogenic amines	Ser-Asn-Lys	VGNYHOBZJKWRGI-CIUDSAMLSA-N	347.368	C13H25N5O6	C(CCN)C[C@@H](C(=O)O)NC(=O)[C@H](CC(=O)N)NC(=O)[C@H](CO)N	71351265								Organic compounds	Organic acids and derivatives	Carboxylic acids and derivatives	Amino acids, peptides, and analogues	Peptides	63878	37386	24263	36499	44300	39784	47879	28842	37686	23299	54383	53147	56427	50512	60017	41704	57158	44306	23332	53002	257550	209025	214530	251843	265443
870	7.87_155.03_7.86_191.02	155.0340_191.0191	7.871_7.858	[M-H]-_[M-H-H2O]-	MSI 2	biogenic amines	Glucaric acid	DSLZVSRJTYRBFB-LLEIAEIESA-N	210.139	C6H10O8	[C@H]([C@@H]([C@@H](C(=O)O)O)O)([C@H](C(=O)O)O)O	33037	HMDB0000663	C00818	LMFA01170108			CHEBI:16002		Organic compounds	Organic oxygen compounds	Organooxygen compounds	Carbohydrates and carbohydrate conjugates	Sugar acids and derivatives	890993	787385	705905	762644	693007	779733	868014	782300	808524	814839	11307044	12988222	12684618	14387805	12863639	11728279	13610614	12202519	10580547	13452489	150273	129379	162315	137681	134137
871	5.64_526.52_5.64_548.50	526.5193_548.5012	5.640_5.636	[M+H]+_[M+Na]+	MSI 2	lipidomics	Cer 33:0;O2|Cer 18:0;O2/15:0	IZHDCKVGRKOGIB-UHFFFAOYSA-N	525.891	C33H67NO3	CCCCCCCCCCCCCCCC(C(CO)NC(=O)CCCCCCCCCCCCCC)O	18625179								Organic compounds	Lipids and lipid-like molecules	Sphingolipids	Ceramides	Long-chain ceramides	6487100	7790566	5778578	6198629	7475423	6368034	7608527	6777242	7113816	6508780	11592743	10173714	13582134	9207466	10381818	10229655	11839585	10526286	11536923	14132737	1256899	1019422	1249204	1087449	1144593
872	5.99_317.25	317.248	5.99	[M+H]+	MSI 1	polyphenols	5-{8(Z),11(Z)-pentadecadienyl}resorcinol	UFMJCOLGRWKUKO-UTOQUPLUSA-N	316.478	C21H32O2	CCC/C=C\C/C=C\CCCCCCCC1=CC(=CC(=C1)O)O	11702450	HMDB0038534							Organic compounds	Benzenoids	Phenols	Benzenediols	Resorcinols	1680568	2917472	3228927	2098848	2620995	3848621	2636040	3591494	1434463	2146233	825549	848641	665369	996016	1189704	1022597	1032148	1072749	906339	783066	11789237	14170395	13446227	16857022	18200683
873	2.01_413.12	413.122	2.012	[M+H]+	MSI 3	polyphenols	2-[3-hydroxy-5-[(E)-2-(4-hydroxyphenyl)ethenyl]phenoxy]-6-(hydroxymethyl)oxane-3,4,5-triol	HSTZMXCBWJGKHG-OWOJBTEDSA-N	390.385	C20H22O8	C1=CC(=CC=C1/C=C/C2=CC(=CC(=C2)OC3C(C(C(C(O3)CO)O)O)O)O)O	5470020								Organic compounds	Phenylpropanoids and polyketides	Stilbenes	Stilbene glycosides	Stilbene glycosides	16598	42539	46061	36808	45324	38837	40308	33747	41703	26601	22833	35647	153215	103109	57999	96817	54408	5244	16508	49249	5530	5196			16344
874	5.47_542.51	542.514	5.467	[M+H]+	MSI 2	lipidomics	Cer 33:0;O3|Cer 17:0;O2/16:0;O	IETAKJALHLJGRK-UHFFFAOYSA-N	541.507	C33H67NO4	CCCCCCCCCCCCCCC(C(CO)NC(=O)C(CCCCCCCCCCCCCC)O)O	138175986								Organic compounds	Lipids and lipid-like molecules	Sphingolipids	Ceramides	Long-chain ceramides	17391020	22561222	20122869	14001137	16377127	23059781	19436725	19355817	18520314	19161843	32857532	31960725	35151464	28048551	33264734	28476023	36924384	25591708	27384616	39396591	3512292	2837978	4118629	3210800	3666318
875	4.41_389.34	389.342	4.412	[M-H]-	MSI 2	lipidomics	Hexacosatrienoic acid	PIZMHCCXGUQRGS-FMYOFDGFSA-N	390.643	C26H46O2	CCCCCCCCCCCCCCCCCCC/C=C/C=C/C=C/C(=O)O	88010695								Organic compounds	Lipids and lipid-like molecules	Fatty Acyls	Fatty acids and conjugates	Very long-chain fatty acids	314387	326745	293928	722528	342636	416261	377113	439109	363236	308871	372579	352513	506209	672226	376530	360657	456357	348857	397109	511248	66762	24733	53587	46341	31726
876	3.03_768.50	768.505	3.028	[M-H]-	MSI 2	lipidomics	SHexCer 32:0;O3	QBESSSDYIATLHW-UHFFFAOYSA-N												Organic compounds	Lipids and lipid-like molecules	Sphingolipids	Glycosphingolipids	SHexCer	35482	24489	59808	12501	32365	17223	11834	25892	21515	22906	121080	80815	124107	52900	70579	56513	56836	73073	93878	35113	213344	218715	279615	224156	329514
877	7.36_628.54_7.36_652.59	628.5446_652.5891	7.357_7.355	[M-H]-_[M+CH3COO]-	MSI 1	lipidomics	Cer 38:1;O2|Cer(d18:1/20:0)	XWBWIAOWSABHFI-NUKVNZTCSA-N	594.008	C38H75NO3	CCCCCCCCCCCCCCCCCCCC(=O)N[C@@H](CO)[C@@H](/C=C/CCCCCCCCCCCCC)O	5283566			LMSP02010007			CHEBI:72962		Organic compounds	Lipids and lipid-like molecules	Sphingolipids	Ceramides	Long-chain ceramides	210044	276427	224845	223640	285789	234463	238398	303908	228029	223179	461951	331117	388137	384028	422677	450259	473562	394001	442850	446482	1594245	1328750	1626667	1517281	1620119
878	5.68_233.15	233.154	5.676	[M+H-H2O]+	MSI 1	polyphenols	Helenine	PXOYOCNNSUAQNS-AGNJHWRGSA-N	232.319	C15H20O2	C[C@H]1CCC[C@]2(C1=C[C@H]3[C@@H](C2)OC(=O)C3=C)C	72724		C09289	LMPR0103190013			CHEBI:2540		Organic compounds	Lipids and lipid-like molecules	Prenol lipids	Terpene lactones	Sesquiterpene lactones	132200	201853	185874	113314	183072	247195	109238	353705	128007	220090	300419	164539	140957	171172	228895	194382	208933	203968	187050	209194	909502	947670	858558	1175723	882731
[truncated: 3,048 more rows]
[truncated: 25 more columns]

## Sheet: Targeted
																											Matrix	RM10162_vg-ly	RM10162_vg-ly	RM10162_vg-ly	RM10162_vg-ly	RM10162_vg-ly	RM10162_vg-ly	RM10162_vg-ly	RM10162_vg-ly	RM10162_vg-ly	RM10162_vg-ly	RM10171_vg-aq	RM10171_vg-aq	RM10171_vg-aq	RM10171_vg-aq	RM10171_vg-aq	RM10171_vg-aq	RM10171_vg-aq	RM10171_vg-aq	RM10171_vg-aq	RM10171_vg-aq	RM10172_om-ly	RM10172_om-ly
[truncated: 26 more rows]
[truncated: 22 more columns]
